# Supplementary material for: Comparison of IncK-blaCMY-2 Plasmids in Extended-Spectrum Cephalosporin-Resistant Escherichia coli Isolated from Poultry and Humans in Denmark, Finland, and Germany
Source: MDPI journal article supplement (doi:10.3390/antibiotics13040349), 2024-04-10
Supplement: s1 [file s1]

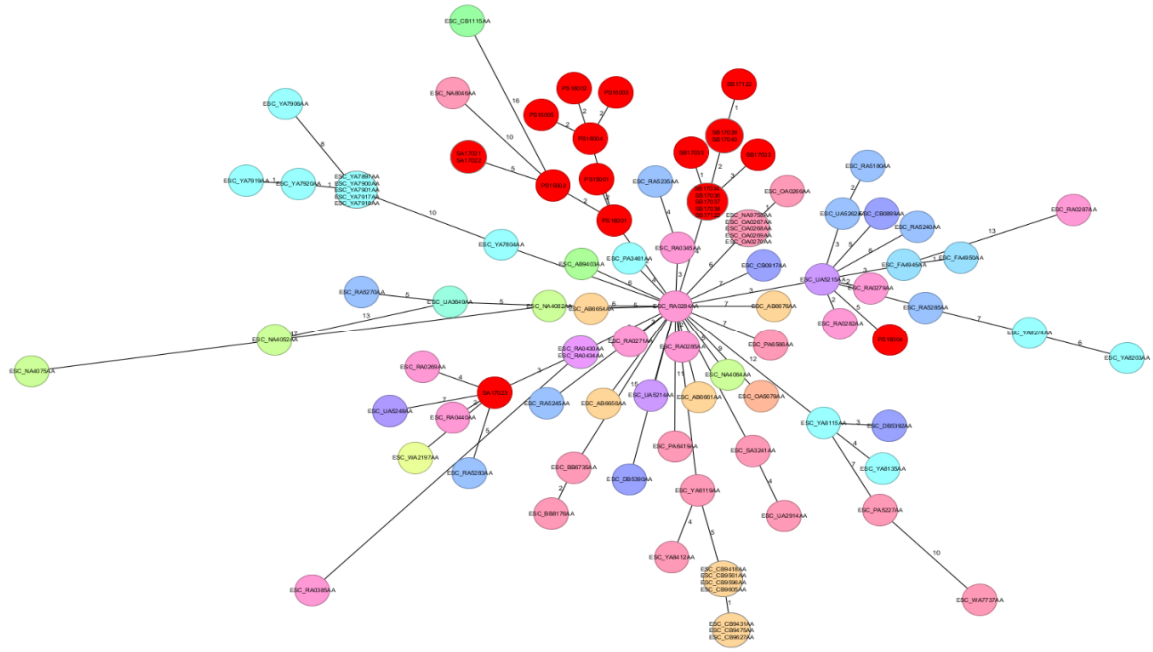

(a)

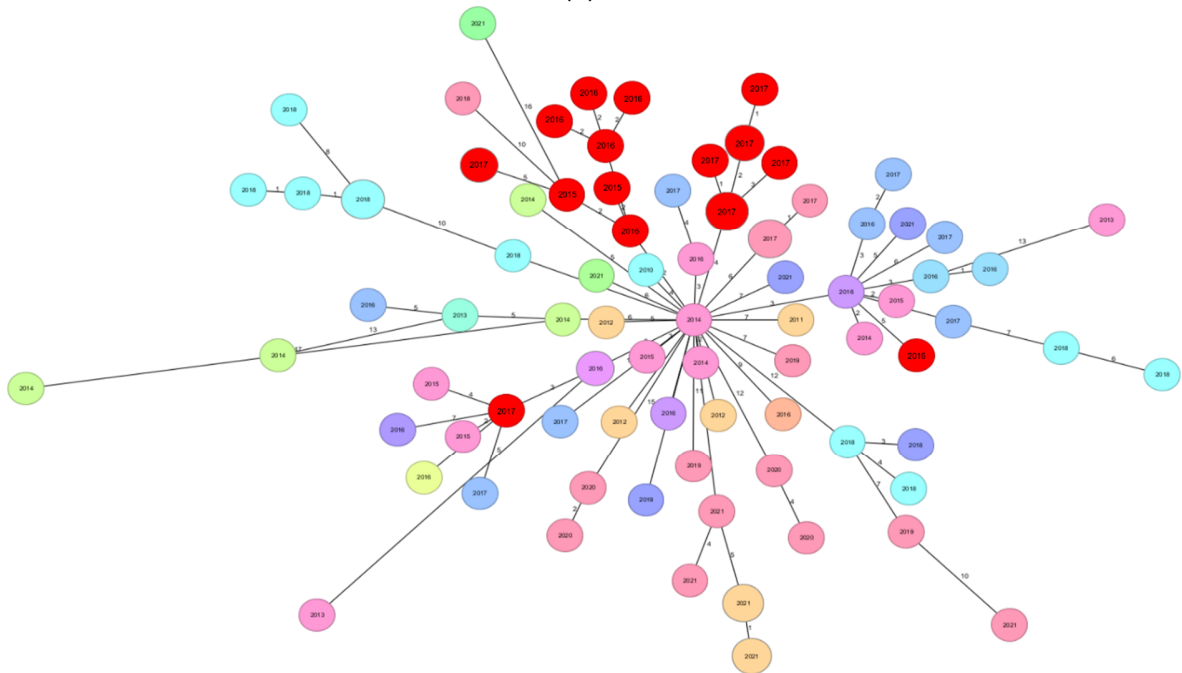

(b)

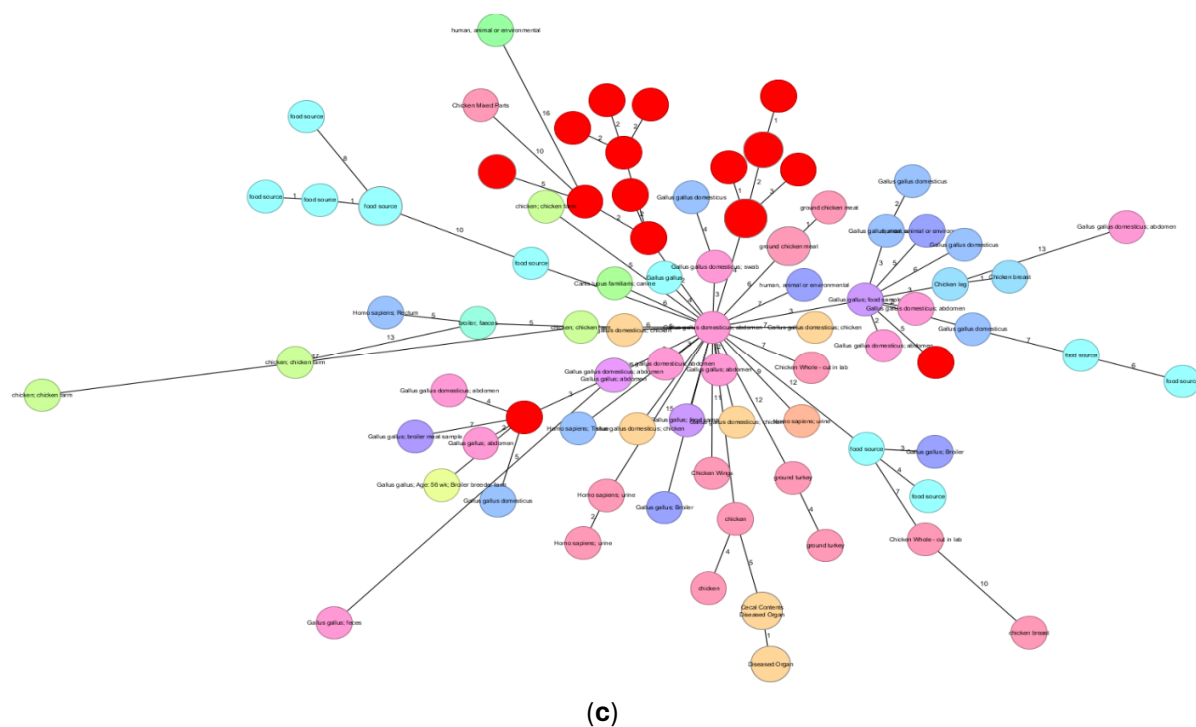

**Figure S3.** (a) Minimum spanning trees of the *E. coli* ST429 with information regarding isolate numbers. (b) Minimum spanning trees of the *E. coli* ST429 with information regarding year of isolation. (c) Minimum spanning trees of the *E. coli* ST429 with information regarding source. All Danish isolated (red circles) are from chicken production.
