# Supplementary material for: Comparison of IncK-blaCMY-2 Plasmids in Extended-Spectrum Cephalosporin-Resistant Escherichia coli Isolated from Poultry and Humans in Denmark, Finland, and Germany
Source: MDPI journal article supplement (doi:10.3390/antibiotics13040349), 2024-04-10
Supplement: s1 [file s1]

(a)

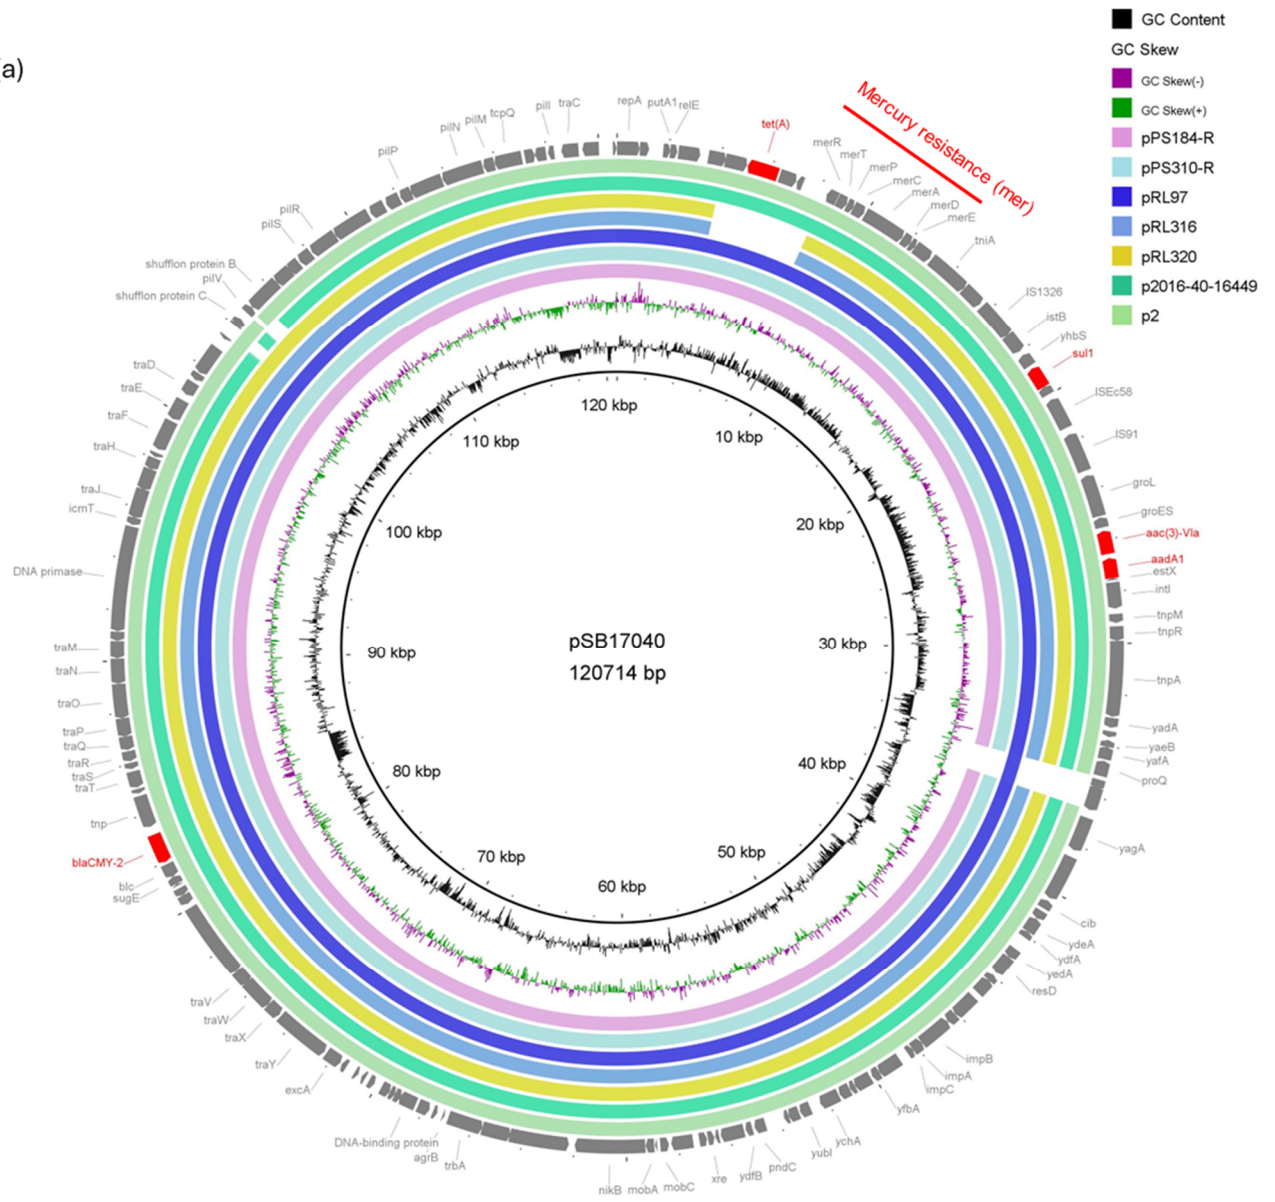

(b)

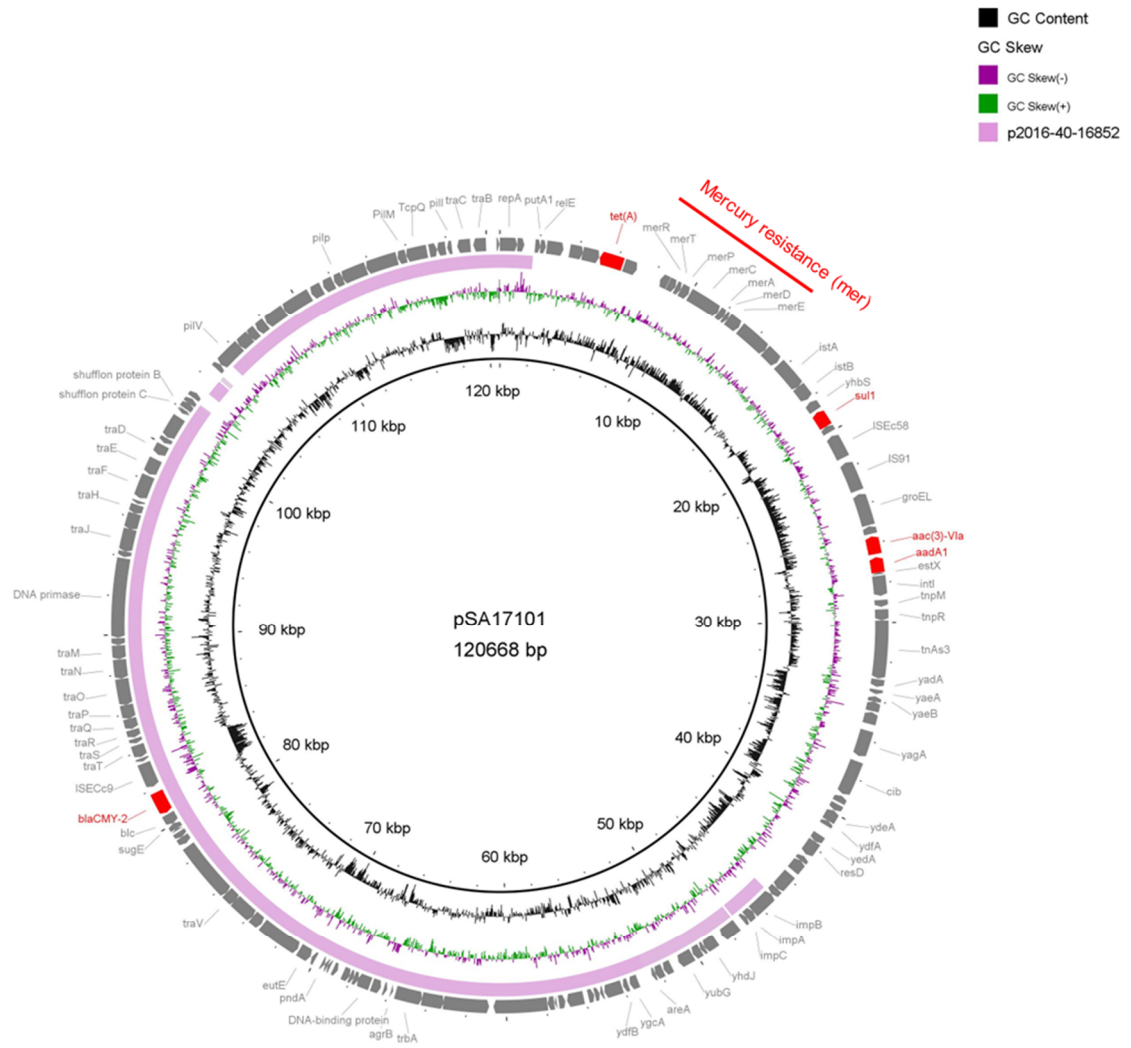

**Supplementary Figure S2.** Circular comparison analysis of Danish IncK-*bla*<sub>CMY-2</sub> plasmids with plasmids from other countries. GC content and GC skew are shown in the inner map. The predicted coding sequence of the plasmid within the circle is annotated in the outer ring with resistance genes highlighted in red. (a) Seven IncK-*bla*<sub>CMY-2</sub> plasmids in ST429 ESC-resistant *E. coli* from other countries were compared with the Danish pSB17040. Among them were ones characterized in the present study; pPS184-R and pPS310-R from Finish poultry, and pRL-97, pRL310 and pRL320 from German chicken meat. Previously published poultry associated plasmids from Norway (p2016-40-16449, Mo et al., 2021), and USA (p2, Feng et al., 2023) were also included. (b) Comparison of the Danish pSA17101 with an IncK-*bla*<sub>CMY-2</sub> plasmid present in a ST162 ESC-resistant *E. coli* from Norwegian poultry.
