# Supplementary material for: Comparison of IncK-blaCMY-2 Plasmids in Extended-Spectrum Cephalosporin-Resistant Escherichia coli Isolated from Poultry and Humans in Denmark, Finland, and Germany
Source: Antibiotics (Basel). 2024 Apr 10;13(4):349. doi: 10.3390/antibiotics13040349 (PMC11047599; doi:10.3390/antibiotics13040349)
Supplement: Supplementary file 1 [file antibiotics-13-00349-s001.zip]

Archive with 9 entries (9 files):
- Fig S1. Comparison of Danish plasmids.pdf
- Fig S2. Comparison of Danish and international plasmids.pdf
- FigS3a-c. Minimum spanning trees of the E. coli ST429.pdf
- Table S1. MIC results.xlsx
- Table S2. Gene_presence_absence.csv
- Table S3. SNP matrix of ST429 and ST1286.xlsx
- Table S4. ST429 in EnteroBase with spanning trees.xlsx
- Table S5. Plasmids annotation.xlsx
- Table S6. IncK plasmids - public and this study.xlsx
