# Supplementary material for: Comparison of IncK-blaCMY-2 Plasmids in Extended-Spectrum Cephalosporin-Resistant Escherichia coli Isolated from Poultry and Humans in Denmark, Finland, and Germany
Source: Antibiotics (Basel). 2024 Apr 10;13(4):349. doi: 10.3390/antibiotics13040349 (PMC11047599; doi:10.3390/antibiotics13040349)
Supplement: Supplementary file 1 [file antibiotics-13-00349-s001.zip › Fig S1. Comparison of Danish plasmids.pdf]

(a)

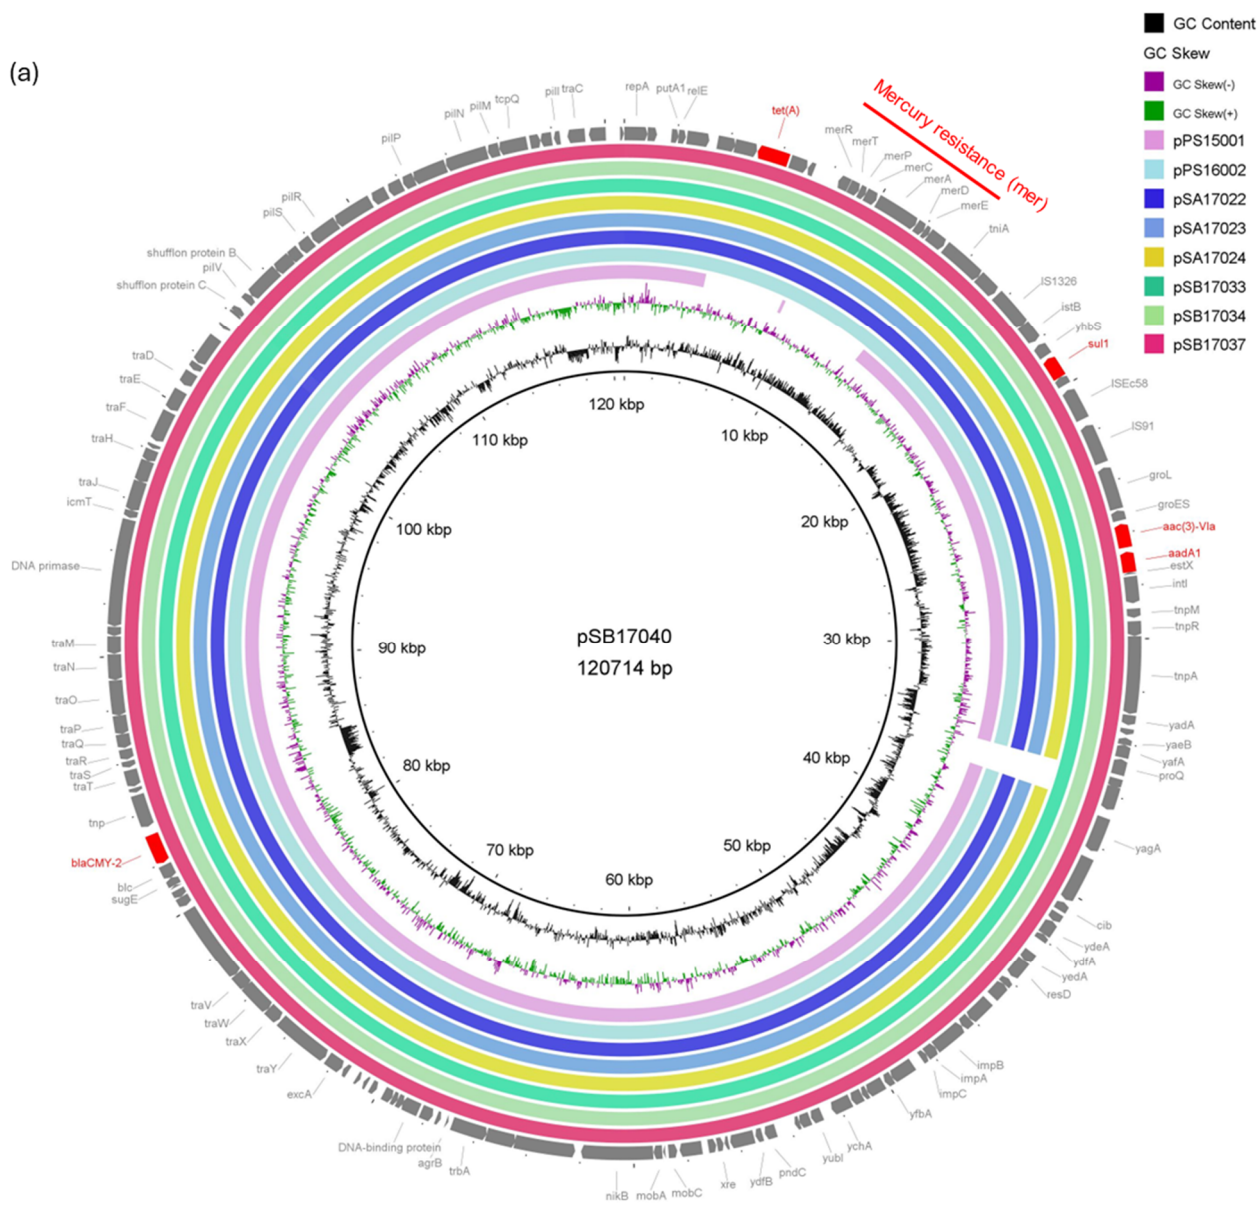

(b)

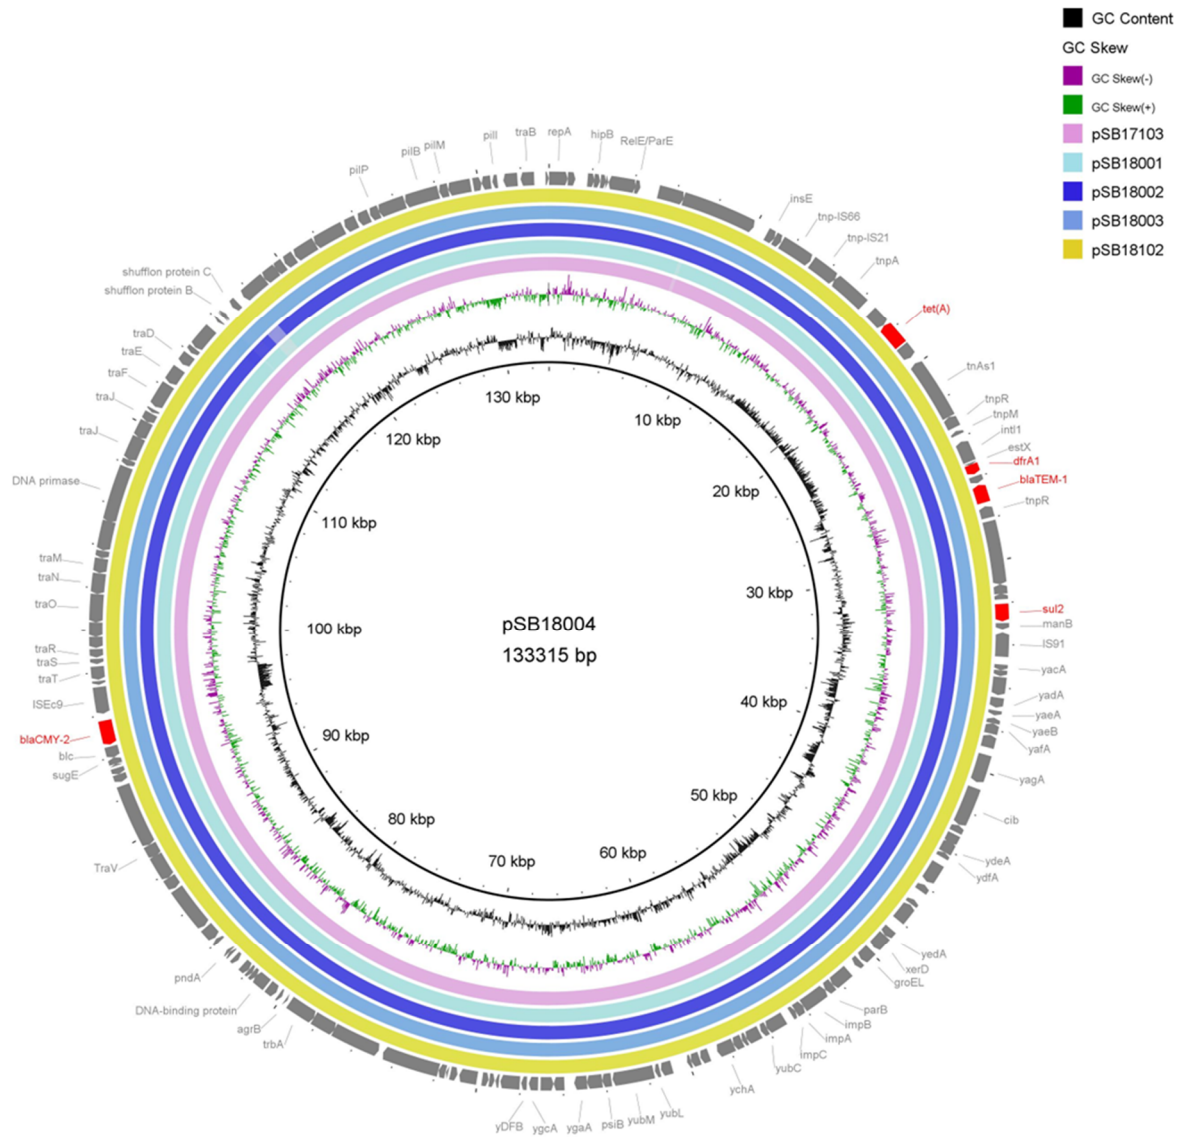

(c)

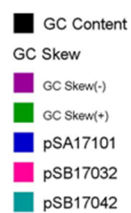

(d)

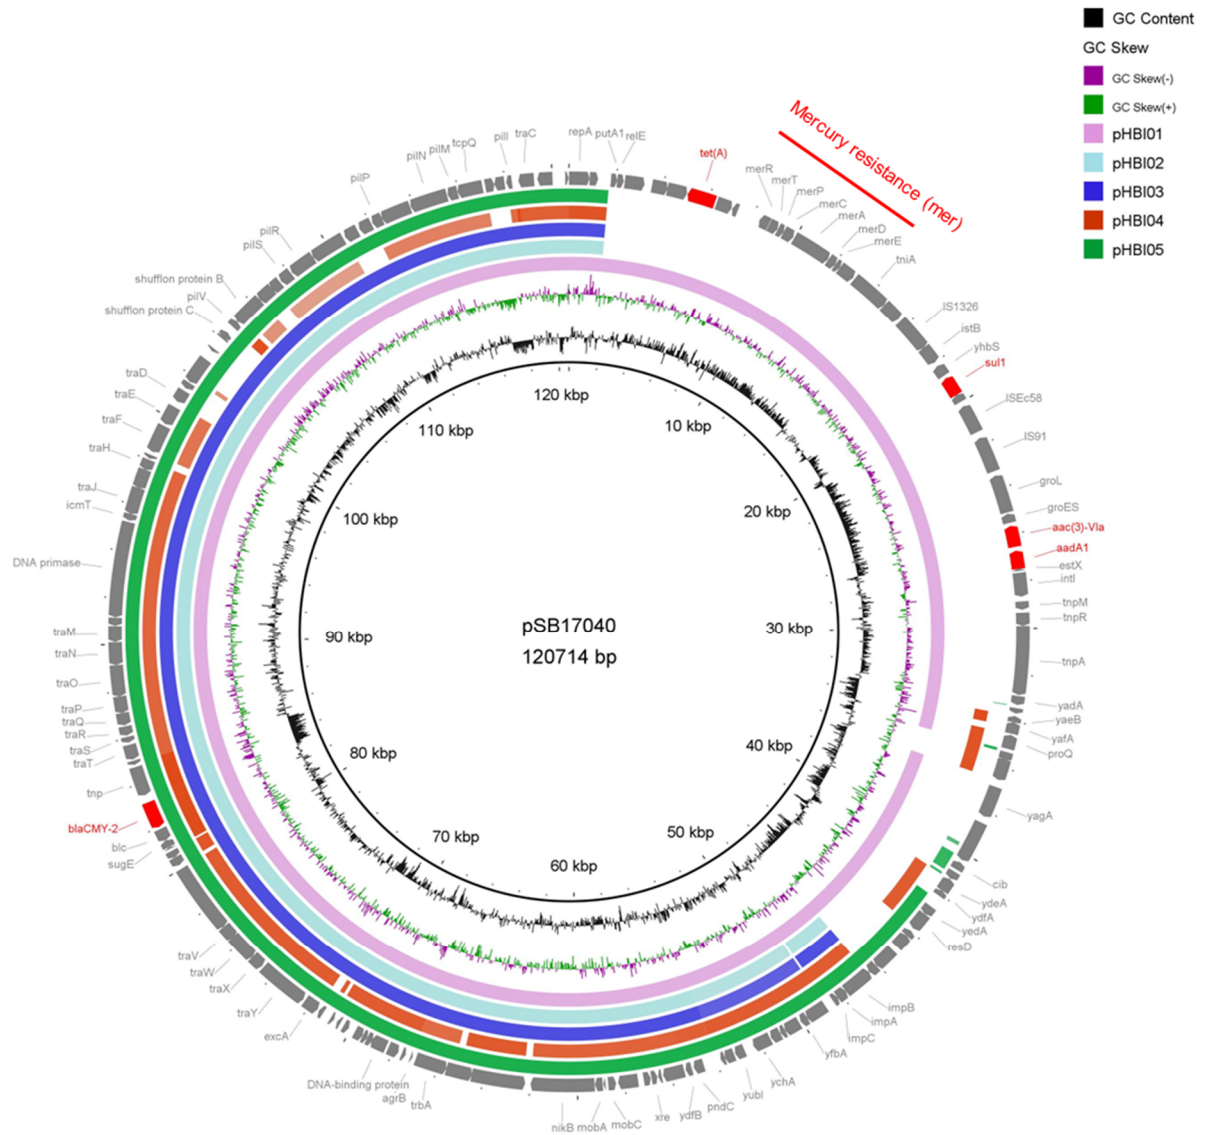

**Supplementary Figure S1.** Circular comparison analysis of Danish IncK-*bla*<sub>CMY-2</sub> plasmids. GC content and GC skew are shown in the inner map. The predicted coding sequence of the plasmid within the circle is annotated in the outer ring with resistance genes highlighted in red. (a) Comparison of nine IncK-*bla*<sub>CMY-2</sub> plasmids in ST429 ESC-resistant *E. coli* from the Danish poultry system and slaughterhouses using pSB17040 as the reference. (b) Comparison of six IncK-*bla*<sub>CMY-2</sub> plasmids present in ST1286 ESC-resistant *E. coli* from Danish slaughterhouses using pSB18004 as the reference. (c) Comparison of three IncK-*bla*<sub>CMY-2</sub> plasmids in ST162, ST350 and ST57 ESC-resistant *E. coli* from Danish slaughterhouses using pSB17040 as the referene. (d) Comparison of five IncK-*bla*<sub>CMY-2</sub> plasmids in different STs (ST429, ST69, ST131, ST95, ST12) ESC-resistant *E. coli* from Danish human clinical samples with the poultry associated pSB17040 reference plasmid.
