# Supplementary material for: Comparison of IncK-blaCMY-2 Plasmids in Extended-Spectrum Cephalosporin-Resistant Escherichia coli Isolated from Poultry and Humans in Denmark, Finland, and Germany
Source: Antibiotics (Basel). 2024 Apr 10;13(4):349. doi: 10.3390/antibiotics13040349 (PMC11047599; doi:10.3390/antibiotics13040349)
Supplement: Supplementary file 1 [file antibiotics-13-00349-s001.zip › Table S1. MIC results.xlsx]

## Sheet: Table S1
Supplementary Table S1. Distribution of minumum inhibitory concentration (MIC) against antibiotics among E. coli isolates in the study
							Beta-lactam				Aminoglycoside		Tetracycline		Folate pathway antagonist		Amphenicol	Macrolide	Polymycin	Quinolone
No.	New_ID	Country	Year/Date	Source	Sample	STs	Amipicin (AMP)	Ceftazidime (TAZ)	Cefotaxime (FOT)	Meropenem (Mero)	Amikacin (AMI)	Gentamicin (Gen)	Tetracycline (TET)	Tigecycline (TGC)	Trimethoprim (TMP)	Sulfamethoxazole (SMX)	Chloramphenicol (CHL)	Azithromycin (AZI)	Colistin (COL)	Nalixic acid (Nali)	Ciprofloxacin (CIP)
1	PS15001	Denmark	2015-10-01	Farm	Environment	429	>32	8	>4	0.03	4	16	2	0.25	0.5	>512	8	4	1	4	0.015
2	PS15002	Denmark	2015-04-09	Farm	Environment	p	>32	8	4	0.03	4	16	2	0.25	0.25	>512	8	4	1	4	0.015
3	PS16001	Denmark	2016-02-08	Farm	Environment	429	>32	8	4	0.03	4	16	>32	0.25	0.5	>512	8	4	1	4	0.015
4	PS16002	Denmark	2016-04-04	Farm	Environment	429	>32	>8	>4	0.03	4	>16	>32	0.25	0.25	>512	8	2	1	4	0.015
5	PS16003	Denmark	2016-04-04	Farm	Environment	429	>32	8	>4	0.03	4	16	>32	0.25	0.25	>512	8	2	1	4	0.015
6	PS16004	Denmark	2016-11-14	Farm	Environment	429	>32	8	>4	0.03	4	>16	>32	0.25	0.25	>512	8	4	1	4	0.015
7	PS16005	Denmark	2016-11-14	Farm	Environment	429	>32	8	>4	0.03	4	>16	>32	0.25	0.25	>512	8	4	1	4	0.015
8	SA17021	Denmark	2017-02-08	Slaughterhouse	Meat	429	>32	8	>4	0.03	4	>16	>32	0.25	0.25	>512	8	4	1	4	0.015
9	SA17022	Denmark	2017-02-08	Slaughterhouse	Meat	429	>32	8	>4	0.03	4	16	>32	0.25	0.25	>512	8	4	1	4	0.015
10	SA17023	Denmark	2017-04-25	Slaughterhouse	Meat	429	>32	8	4	0.03	4	16	>32	0.25	0.25	>512	8	4	1	4	0.015
11	SA17024	Denmark	2017-11-07	Slaughterhouse	Meat	429	>32	8	>4	0.03	4	16	>32	0.25	0.25	>512	8	4	1	4	0.015
12	SB17033	Denmark	2017-09-04	Slaughterhouse	Meat	429	>32	>8	>4	0.03	4	1	2	0.25	0.5	>512	8	8	1	4	0.015
13	SB17034	Denmark	2017-09-04	Slaughterhouse	Meat	429	>32	8	>4	0.03	4	1	2	0.25	0.25	16	8	4	1	4	0.03
14	SB17035	Denmark	2017-09-04	Slaughterhouse	Meat	429	>32	>8	>4	0.03	4	>16	>32	0.25	0.5	>512	8	4	1	4	0.03
15	SB17036	Denmark	2017-09-04	Slaughterhouse	Meat	429	>32	>8	>4	0.03	4	>16	>32	0.25	0.25	>512	8	4	1	4	0.03
16	SB17037	Denmark	2017-09-05	Slaughterhouse	Meat	429	>32	>8	>4	0.03	4	>16	>32	0.25	0.25	>512	8	4	1	4	0.015
17	SB17038	Denmark	2017-09-05	Slaughterhouse	Meat	429	>32	>8	>4	0.03	4	16	>32	0.25	0.5	>512	8	4	1	4	0.03
18	SB17039	Denmark	2017-11-13	Slaughterhouse	Meat	429	>32	>8	>4	0.03	4	>16	>32	0.25	0.25	>512	8	4	1	4	0.03
19	SB17040	Denmark	2017-11-14	Slaughterhouse	Meat	429	>32	>8	>4	0.03	4	>16	>32	0.25	0.5	>512	8	4	1	4	0.03
20	SB17121	Denmark	2017-09-04	Slaughterhouse	Intestine	429	>32	>8	>4	0.03	4	2	>32	0.25	0.5	>512	8	4	1	4	0.015
21	SB17122	Denmark	2017-11-13	Slaughterhouse	Intestine	429	>32	>8	>4	0.03	4	16	>32	0.25	0.25	>512	8	4	1	4	0.03
22	SB17123	Denmark	2017-04-25	Slaughterhouse	Intestine	429	>32	>8	>4	0.03	4	>16	>32	0.25	0.25	>512	8	4	1	4	0.03
23	SB17103	Denmark	2017-09-13	Slaughterhouse	Intestine	1286	>32	>8	>4	0.03	4	1	>32	0.25	>16	>512	8	4	1	4	0.015
24	SB18102	Denmark	2018-01-17	Slaughterhouse	Intestine	1286	>32	8	>4	0.03	4	1	>32	0.25	>16	>512	8	4	1	4	0.015
25	SB18001	Denmark	2018-04-16	Slaughterhouse	Meat	1286	>32	>8	>4	0.03	4	1	>32	0.25	>16	>512	8	2	1	4	0.015
26	SB18002	Denmark	2018-04-16	Slaughterhouse	Meat	1286	>32	>8	>4	0.03	4	1	>32	0.25	>16	>512	8	4	1	4	0.015
27	SB18003	Denmark	2018-01-08	Slaughterhouse	Meat	1286	>32	8	>4	0.03	4	1	>32	0.25	>16	>512	8	4	1	4	0.015
28	SB18004	Denmark	2018-01-17	Slaughterhouse	Meat	1286	>32	>8	>4	0.03	4	1	>32	0.25	>16	>512	8	4	1	4	0.015
29	SA17101	Denmark	2017-02-07	Slaughterhouse	Intestine	162	>32	8	>4	0.03	4	>16	>32	0.5	0.5	>512	8	8	1	4	0.015
30	SB17032	Denmark	2017-02-14	Slaughterhouse	Meat	350	32	2	4	0.03	4	0.5	>32	0.25	0.5	>512	8	4	1	>64	0.25
31	SB17042	Denmark	2017-09-05	Slaughterhouse	Meat	57	>32	>8	>4	0.03	4	0.5	>32	0.25	>16	>512	8	8	1	4	0.03
32	HBI01	Denmark	2017-05-01	Clinical	Blood	429, 634	>32	>8	>4	0.03	4	16	>32	0.25	0.25	>512	16	4	1	4	0.015
33	HBI02	Denmark	2020-05-01	Clinical	Blood	69,3	>32	>8	>4	0.03	4	>16	>32	0.25	>16	>512	32	>64	1	>64	0.5
34	HBI03	Denmark	2021-03-01	Clinical	Blood	131, 506	>32	>8	>4	0.03	4	0.5	2	0.25	0.5	16	8	4	1	>64	0.5
35	HBI04	Denmark	2019-11-01	Clinical	Blood	95, 2	>32	4	2	0.03	4	>16	>32	0.25	>16	>512	16	4	1	>64	0.25
36	HBI05	Denmark	2017-10-01	Clinical	Blood	12, 35	>32	8	>4	0.03	4	0.5	>32	0.25	0.5	16	8	4	1	4	0.015
37	2E151-R	Finland	2017-06-01	Farm	Egg	429	>32	8	>4	0.03	4	>16	>32	0.25	0.25	>512	8	4	1	4	0.015
38	PS310-R	Finland	2017-06-01	Farm	Parent bird	429	>32	8	>4	0.03	4	>16	>32	0.25	0.25	>512	8	4	1	4	0.015
39	PS184-R	Finland	2017-06-01	Farm	Parent bird	429	>32	8	>4	0.03	4	>16	>32	0.25	0.25	>512	8	4	1	4	0.015
40	PS148-R	Finland	2017-06-01	Farm	Parent bird	429	>32	8	>4	0.03	4	>16	>32	0.25	0.25	>512	8	4	1	4	0.03
41	PS378-R	Finland	2017-06-01	Farm	Parent bird	429	>32	8	>4	0.03	4	16	>32	0.25	0.25	>512	8	4	1	4	0.015
42	Y13-R	Finland	2017-06-01	Farm	Environment	429	>32	8	>4	0.03	4	>16	>32	0.25	0.25	>512	8	4	1	4	0.015
43	PS57-R	Finland	2017-06-01	Farm	Parent bird	429	>32	>8	>4	0.03	4	>16	>32	0.25	0.25	>512	8	4	1	4	0.015
44	RL97	Germany	2012	Food	Chicken Meat	429	>32	>8	>4	0.03	4	>16	>32	0.25	0.25	>512	8	2	1	4	0.015
45	RL316	Germany	2012	Food	Chicken Meat	429	>32	>8	>4	0.03	4	>16	2	0.25	1	>512	8	2	1	4	0.015
46	RL320	Germany	2012	Food	Chicken Meat	429	>32	>8	>4	0.03	4	>16	2	0.25	1	>512	8	2	1	4	0.015
