# Supplementary material for: Comparison of IncK-blaCMY-2 Plasmids in Extended-Spectrum Cephalosporin-Resistant Escherichia coli Isolated from Poultry and Humans in Denmark, Finland, and Germany
Source: Antibiotics (Basel). 2024 Apr 10;13(4):349. doi: 10.3390/antibiotics13040349 (PMC11047599; doi:10.3390/antibiotics13040349)
Supplement: Supplementary file 1 [file antibiotics-13-00349-s001.zip › Table S2. Gene_presence_absence.csv]

Gene	Non-unique Gene name	Annotation	No. isolates	No. sequences	Avg sequences per isolate	Genome Fragment	Order within Fragment	Accessory Fragment	Accessory Order with Fragment	QC	Min group size nuc	Max group size nuc	Avg group size nuc	2E151-R	HBI01	HBI05	HBI04	HBI02	HBI03	PS148-R	PS15001	PS15002	PS16001	PS16002	PS16003	PS16004	PS16005	PS184-R	PS310-R	PS378-R	PS57-R	RL316	RL320	RL97	SA17021	SA17022	SA17023	SA17024	SA17101	SB17032	SB17033	SB17034	SB17035	SB17036	SB17037	SB17038	SB17039	SB17040	SB17042
nusG		transcription termination/antitermination protein NusG	46	46	1	99	6775				545	545	545	2E151-R_24900	HBI01_15295	HBI05_14090	HBI04_15105	HBI02_14945	HBI03_13915	PS148-R_24640	PS15001_11745	PS15002_11770	PS16001_13690	PS16002_12740	PS16003_14060	PS16004_21860	PS16005_23155	PS184-R_25170	PS310-R_24995	PS378-R_25140	PS57-R_24865	RL316_16075	RL320_17900	RL97_10300	SA17021_16465	SA17022_15725	SA17023_24365	SA17024_15710	SA17101_16155	SB17032_10980	SB17033_19685	SB17034_17200	SB17035_12855	SB17036_17465	SB17037_16010	SB17038_20400	SB17039_13300	SB17040_16290	SB17042_24035
ppiD		peptidylprolyl isomerase	46	46	1	99	1989				1871	1871	1871	2E151-R_12150	HBI01_14230	HBI05_12645	HBI04_08145	HBI02_26090	HBI03_02125	PS148-R_11870	PS15001_01490	PS15002_04385	PS16001_06700	PS16002_01975	PS16003_10505	PS16004_00525	PS16005_17070	PS184-R_11720	PS310-R_13120	PS378-R_11890	PS57-R_10265	RL316_00710	RL320_11020	RL97_13950	SA17021_04755	SA17022_23400	SA17023_10695	SA17024_07575	SA17101_14330	SB17032_12940	SB17033_09660	SB17034_08885	SB17035_08385	SB17036_06550	SB17037_23875	SB17038_25505	SB17039_11340	SB17040_00135	SB17042_14730
kdgA		bifunctional 4-hydroxy-2-oxoglutarate aldolase/2-dehydro-3-deoxy-phosphogluconate aldolase	46	46	1	99	9523				641	641	641	2E151-R_09995	HBI01_00895	HBI05_15840	HBI04_03255	HBI02_22285	HBI03_01770	PS148-R_09765	PS15001_03845	PS15002_16525	PS16001_07100	PS16002_20720	PS16003_20705	PS16004_16600	PS16005_20645	PS184-R_01390	PS310-R_01335	PS378-R_07035	PS57-R_12490	RL316_12350	RL320_10485	RL97_10615	SA17021_08475	SA17022_21190	SA17023_19470	SA17024_12145	SA17101_00520	SB17032_19800	SB17033_15685	SB17034_04450	SB17035_03715	SB17036_22700	SB17037_02545	SB17038_19730	SB17039_16955	SB17040_14015	SB17042_13430
fdoI		formate dehydrogenase cytochrome b556 subunit	46	46	1	99	1054				635	635	635	2E151-R_20835	HBI01_10210	HBI05_07845	HBI04_11715	HBI02_13860	HBI03_04155	PS148-R_21075	PS15001_16345	PS15002_00930	PS16001_11345	PS16002_05555	PS16003_00740	PS16004_06205	PS16005_03755	PS184-R_20935	PS310-R_17530	PS378-R_21300	PS57-R_20895	RL316_03675	RL320_15755	RL97_01480	SA17021_17040	SA17022_11765	SA17023_07300	SA17024_10145	SA17101_09080	SB17032_09545	SB17033_18345	SB17034_24335	SB17035_09860	SB17036_07130	SB17037_09200	SB17038_04570	SB17039_00250	SB17040_08675	SB17042_20535
mscL		large-conductance mechanosensitive channel protein MscL	46	46	1	99	6795				410	413	412	2E151-R_23685	HBI01_09440	HBI05_17310	HBI04_05575	HBI02_12910	HBI03_21880	PS148-R_23355	PS15001_18640	PS15002_17295	PS16001_18810	PS16002_22795	PS16003_23215	PS16004_25350	PS16005_22555	PS184-R_23785	PS310-R_24010	PS378-R_24150	PS57-R_23620	RL316_02150	RL320_03180	RL97_02865	SA17021_17905	SA17022_15915	SA17023_25450	SA17024_14370	SA17101_08675	SB17032_06745	SB17033_21085	SB17034_24660	SB17035_25390	SB17036_21040	SB17037_10385	SB17038_19030	SB17039_11010	SB17040_17060	SB17042_24510
dtd		D-aminoacyl-tRNA deacylase	46	46	1	99	1044				437	437	437	2E151-R_20895	HBI01_10270	HBI05_07880	HBI04_25715	HBI02_21515	HBI03_00325	PS148-R_21135	PS15001_16405	PS15002_00990	PS16001_11405	PS16002_05615	PS16003_00800	PS16004_06145	PS16005_03695	PS184-R_20995	PS310-R_17590	PS378-R_21360	PS57-R_20955	RL316_03615	RL320_15695	RL97_01420	SA17021_17100	SA17022_11825	SA17023_07240	SA17024_10085	SA17101_09125	SB17032_09505	SB17033_18285	SB17034_24395	SB17035_09920	SB17036_07070	SB17037_09140	SB17038_04630	SB17039_00190	SB17040_08615	SB17042_20505
gudP		galactarate/glucarate/glycerate transporter GudP	46	46	1	99	7730				1352	1352	1352	2E151-R_16545	HBI01_09135	HBI05_20815	HBI04_20755	HBI02_26935	HBI03_12605	PS148-R_15850	PS15001_06225	PS15002_00210	PS16001_01835	PS16002_17785	PS16003_18130	PS16004_11410	PS16005_07180	PS184-R_15695	PS310-R_18320	PS378-R_15810	PS57-R_15290	RL316_18515	RL320_21225	RL97_14955	SA17021_19905	SA17022_08015	SA17023_16125	SA17024_24875	SA17101_06725	SB17032_01515	SB17033_13720	SB17034_15375	SB17035_19260	SB17036_05985	SB17037_19400	SB17038_10745	SB17039_06300	SB17040_11055	SB17042_12980
rseA		anti-sigma-E factor RseA	46	46	1	99	250				650	650	650	2E151-R_15215	HBI01_20215	HBI05_06580	HBI04_24020	HBI02_01425	HBI03_06605	PS148-R_14190	PS15001_13155	PS15002_13005	PS16001_04625	PS16002_08115	PS16003_07950	PS16004_06675	PS16005_20375	PS184-R_14035	PS310-R_12330	PS378-R_11530	PS57-R_14375	RL316_09530	RL320_25905	RL97_10830	SA17021_03455	SA17022_03965	SA17023_20365	SA17024_02415	SA17101_05815	SB17032_15690	SB17033_07650	SB17034_11475	SB17035_20000	SB17036_04880	SB17037_15600	SB17038_07465	SB17039_09290	SB17040_00495	SB17042_00095
acrB		efflux RND transporter permease AcrB	46	46	1	99	2010				3149	3149	3149	2E151-R_12255	HBI01_14335	HBI05_12750	HBI04_08250	HBI02_26195	HBI03_22600	PS148-R_11975	PS15001_01595	PS15002_04280	PS16001_06805	PS16002_01870	PS16003_10610	PS16004_00420	PS16005_17175	PS184-R_11825	PS310-R_13225	PS378-R_11785	PS57-R_10370	RL316_00605	RL320_10915	RL97_13845	SA17021_04650	SA17022_23505	SA17023_12015	SA17024_07680	SA17101_14435	SB17032_12835	SB17033_09555	SB17034_08780	SB17035_08280	SB17036_06445	SB17037_23770	SB17038_25400	SB17039_11235	SB17040_00240	SB17042_14625
barA		two-component sensor histidine kinase BarA	46	46	1	99	7733				2756	2756	2756	2E151-R_16530	HBI01_09120	HBI05_20800	HBI04_20740	HBI02_26950	HBI03_12590	PS148-R_15865	PS15001_06210	PS15002_00225	PS16001_01820	PS16002_17770	PS16003_18115	PS16004_11425	PS16005_07195	PS184-R_15710	PS310-R_18305	PS378-R_15795	PS57-R_15305	RL316_18500	RL320_21240	RL97_14940	SA17021_19890	SA17022_08030	SA17023_16110	SA17024_24890	SA17101_06710	SB17032_01530	SB17033_13705	SB17034_15360	SB17035_19275	SB17036_06000	SB17037_19415	SB17038_10760	SB17039_06315	SB17040_11070	SB17042_12995
gadC		acid resistance gamma-aminobutyrate antiporter GadC	46	46	1	99	3259				1535	1535	1535	2E151-R_25035	HBI01_12555	HBI05_06830	HBI04_13045	HBI02_26370	HBI03_13885	PS148-R_25045	PS15001_19150	PS15002_19785	PS16001_21030	PS16002_12880	PS16003_16485	PS16004_16945	PS16005_22620	PS184-R_25180	PS310-R_25105	PS378-R_25250	PS57-R_25100	RL316_04200	RL320_10745	RL97_12200	SA17021_22200	SA17022_19355	SA17023_26220	SA17024_18710	SA17101_25550	SB17032_25470	SB17033_21875	SB17034_05355	SB17035_10110	SB17036_18390	SB17037_17320	SB17038_15105	SB17039_08620	SB17040_18260	SB17042_22505
xylA		xylose isomerase	46	46	1	99	7147				1322	1322	1322	2E151-R_07480	HBI01_06395	HBI05_16170	HBI04_03700	HBI02_16210	HBI03_08140	PS148-R_05940	PS15001_05250	PS15002_06695	PS16001_01165	PS16002_00540	PS16003_04220	PS16004_05495	PS16005_00265	PS184-R_09415	PS310-R_09720	PS378-R_08915	PS57-R_05805	RL316_02695	RL320_09800	RL97_23945	SA17021_15210	SA17022_00150	SA17023_15040	SA17024_04725	SA17101_13660	SB17032_18925	SB17033_01375	SB17034_02550	SB17035_05730	SB17036_00445	SB17037_20885	SB17038_21900	SB17039_02235	SB17040_04660	SB17042_03645
folC		bifunctional tetrahydrofolate synthase/dihydrofolate synthase	46	46	1	99	10220				1268	1268	1268	2E151-R_05170	HBI01_10950	HBI05_05460	HBI04_14710	HBI02_25840	HBI03_07260	PS148-R_03450	PS15001_14300	PS15002_03055	PS16001_03480	PS16002_11965	PS16003_06800	PS16004_01645	PS16005_14280	PS184-R_07000	PS310-R_08200	PS378-R_03450	PS57-R_04280	RL316_14550	RL320_08740	RL97_22120	SA17021_13380	SA17022_02820	SA17023_10015	SA17024_17995	SA17101_04490	SB17032_14190	SB17033_06705	SB17034_12625	SB17035_21150	SB17036_15180	SB17037_06135	SB17038_06320	SB17039_02545	SB17040_01640	SB17042_01360
ubiU		Ubiquinone biosynthesis protein UbiU	46	46	1	99	9102				995	995	995	2E151-R_01455	HBI01_07075	HBI05_13355	HBI04_01735	HBI02_24360	HBI03_13010	PS148-R_00585	PS15001_06905	PS15002_21940	PS16001_10015	PS16002_25845	PS16003_02065	PS16004_03750	PS16005_08570	PS184-R_03320	PS310-R_04490	PS378-R_00585	PS57-R_00585	RL316_26295	RL320_24110	RL97_17165	SA17021_09635	SA17022_05940	SA17023_06250	SA17024_09300	SA17101_11180	SB17032_16880	SB17033_23330	SB17034_06320	SB17035_24185	SB17036_16505	SB17037_16485	SB17038_01900	SB17039_04780	SB17040_08085	SB17042_05600
htpG		molecular chaperone HtpG	46	46	1	99	2021				1874	1874	1874	2E151-R_12310	HBI01_14390	HBI05_12805	HBI04_08305	HBI02_26250	HBI03_22655	PS148-R_12030	PS15001_01650	PS15002_04225	PS16001_06860	PS16002_01815	PS16003_10665	PS16004_00365	PS16005_17235	PS184-R_11880	PS310-R_13280	PS378-R_11730	PS57-R_10425	RL316_00550	RL320_10860	RL97_13790	SA17021_04595	SA17022_23560	SA17023_12070	SA17024_07735	SA17101_14490	SB17032_00145	SB17033_09500	SB17034_08725	SB17035_08225	SB17036_06390	SB17037_23715	SB17038_25345	SB17039_11180	SB17040_00295	SB17042_14570
trhO		rhodanese-related sulfurtransferase	46	46	1	99	678				1052	1052	1052	2E151-R_03500	HBI01_23765	HBI05_14655	HBI04_23410	HBI02_21315	HBI03_23080	PS148-R_05260	PS15001_22385	PS15002_01585	PS16001_17825	PS16002_10060	PS16003_12380	PS16004_19740	PS16005_18580	PS184-R_06225	PS310-R_06530	PS378-R_04230	PS57-R_02450	RL316_24445	RL320_23170	RL97_06685	SA17021_00165	SA17022_08735	SA17023_02035	SA17024_16860	SA17101_02695	SB17032_04305	SB17033_02765	SB17034_19325	SB17035_05050	SB17036_10035	SB17037_02845	SB17038_12565	SB17039_23505	SB17040_18965	SB17042_09615
yohK		CidB/LrgB family autolysis modulator	46	46	1	99	28				695	695	695	2E151-R_04275	HBI01_18385	HBI05_09855	HBI04_17100	HBI02_06130	HBI03_10895	PS148-R_02555	PS15001_15195	PS15002_03950	PS16001_02585	PS16002_15565	PS16003_05905	PS16004_02940	PS16005_14540	PS184-R_07895	PS310-R_07305	PS378-R_02555	PS57-R_05175	RL316_15445	RL320_12655	RL97_05875	SA17021_12880	SA17022_01925	SA17023_09115	SA17024_19975	SA17101_03665	SB17032_24345	SB17033_18940	SB17034_14440	SB17035_22045	SB17036_03285	SB17037_07030	SB17038_05425	SB17039_03440	SB17040_02535	SB17042_08250
leuC		3-isopropylmalate dehydratase large subunit	46	46	1	99	8900				1400	1400	1400	2E151-R_10730	HBI01_16555	HBI05_11285	HBI04_18355	HBI02_18595	HBI03_06425	PS148-R_07720	PS15001_12575	PS15002_25270	PS16001_12935	PS16002_23565	PS16003_11395	PS16004_23615	PS16005_24305	PS184-R_10300	PS310-R_10600	PS378-R_09895	PS57-R_07680	RL316_06240	RL320_04305	RL97_18555	SA17021_21360	SA17022_25815	SA17023_23365	SA17024_21620	SA17101_12875	SB17032_27685	SB17033_00715	SB17034_00195	SB17035_13900	SB17036_11525	SB17037_00970	SB17038_17110	SB17039_19480	SB17040_23150	SB17042_02630
ybjQ		UPF0145 protein Ent638_1382	46	46	1	99	10030				323	323	323	2E151-R_02645	HBI01_13230	HBI05_07105	HBI04_05140	HBI02_03200	HBI03_01200	PS148-R_04405	PS15001_23240	PS15002_02440	PS16001_05515	PS16002_10915	PS16003_14855	PS16004_14835	PS16005_19705	PS184-R_05370	PS310-R_05675	PS378-R_05085	PS57-R_03305	RL316_16890	RL320_14915	RL97_09275	SA17021_00925	SA17022_09590	SA17023_00480	SA17024_00640	SA17101_01775	SB17032_23295	SB17033_04495	SB17034_20180	SB17035_06420	SB17036_04505	SB17037_03700	SB17038_02460	SB17039_22650	SB17040_19820	SB17042_18685
group_10019	feoB	Fe(2+) transporter permease subunit FeoB	46	46	1	99	6925				2321	2321	2321	2E151-R_14060	HBI01_03730	HBI05_17815	HBI04_11395	HBI02_12480	HBI03_23325	PS148-R_13500	PS15001_03095	PS15002_22870	PS16001_14030	PS16002_18665	PS16003_13120	PS16004_14040	PS16005_06225	PS184-R_13625	PS310-R_14745	PS378-R_13960	PS57-R_13220	RL316_19870	RL320_13735	RL97_00345	SA17021_16085	SA17022_16490	SA17023_08030	SA17024_05515	SA17101_15325	SB17032_03715	SB17033_11195	SB17034_26015	SB17035_03145	SB17036_23730	SB17037_25190	SB17038_18455	SB17039_13640	SB17040_25410	SB17042_04720
yoaB		RutC family protein YoaB	46	46	1	99	9469				344	347	344	2E151-R_05620	HBI01_19805	HBI05_24000	HBI04_17570	HBI02_22060	HBI03_08375	PS148-R_09980	PS15001_24625	PS15002_06920	PS16001_21400	PS16002_20945	PS16003_24760	PS16004_25700	PS16005_21660	PS184-R_01165	PS310-R_01560	PS378-R_07260	PS57-R_09460	RL316_21475	RL320_00130	RL97_03560	SA17021_08250	SA17022_20965	SA17023_19250	SA17024_11920	SA17101_00740	SB17032_20025	SB17033_25830	SB17034_04225	SB17035_08910	SB17036_19290	SB17037_07340	SB17038_19955	SB17039_16730	SB17040_14240	SB17042_13205
ybjS		Uncharacterized protein YbjS	46	46	1	99	10032				1013	1013	1013	2E151-R_02655	HBI01_13240	HBI05_07095	HBI04_05150	HBI02_03210	HBI03_01210	PS148-R_04415	PS15001_23230	PS15002_02430	PS16001_05505	PS16002_10905	PS16003_14865	PS16004_14825	PS16005_19715	PS184-R_05380	PS310-R_05685	PS378-R_05075	PS57-R_03295	RL316_16880	RL320_14905	RL97_09285	SA17021_00915	SA17022_09580	SA17023_00490	SA17024_00630	SA17101_01785	SB17032_23305	SB17033_04485	SB17034_20170	SB17035_06410	SB17036_04515	SB17037_03690	SB17038_02450	SB17039_22660	SB17040_19810	SB17042_18675
waaA		lipid IV(A) 3-deoxy-D-manno-octulosonic acid transferase	46	46	1	99	4796				1277	1277	1277	2E151-R_07815	HBI01_04675	HBI05_08665	HBI04_19940	HBI02_04205	HBI03_07695	PS148-R_06275	PS15001_05585	PS15002_06360	PS16001_00830	PS16002_00875	PS16003_03885	PS16004_07740	PS16005_01085	PS184-R_09080	PS310-R_09385	PS378-R_08580	PS57-R_06140	RL316_03030	RL320_09465	RL97_08215	SA17021_14875	SA17022_00485	SA17023_04350	SA17024_04390	SA17101_01505	SB17032_18580	SB17033_01710	SB17034_02215	SB17035_06065	SB17036_00780	SB17037_21220	SB17038_21565	SB17039_01900	SB17040_04995	SB17042_19360
glgB		1,4-alpha-glucan branching enzyme	46	46	1	99	6954				2186	2186	2186	2E151-R_13945	HBI01_03845	HBI05_17965	HBI04_18800	HBI02_20565	HBI03_14595	PS148-R_13615	PS15001_02980	PS15002_22985	PS16001_14145	PS16002_18550	PS16003_13005	PS16004_19020	PS16005_06110	PS184-R_13510	PS310-R_14860	PS378-R_14075	PS57-R_13105	RL316_19985	RL320_13850	RL97_00460	SA17021_15970	SA17022_16605	SA17023_08145	SA17024_05400	SA17101_26660	SB17032_03580	SB17033_11310	SB17034_25900	SB17035_03030	SB17036_23615	SB17037_25075	SB17038_18340	SB17039_13755	SB17040_25295	SB17042_04585
emrB		multidrug efflux MFS transporter permease subunit EmrB	46	46	1	99	8029				1538	1538	1538	2E151-R_21925	HBI01_02970	HBI05_00165	HBI04_22150	HBI02_17475	HBI03_14140	PS148-R_21635	PS15001_10460	PS15002_17855	PS16001_26485	PS16002_07465	PS16003_24400	PS16004_10740	PS16005_02960	PS184-R_21785	PS310-R_22650	PS378-R_22390	PS57-R_21745	RL316_17915	RL320_05665	RL97_11750	SA17021_11000	SA17022_14885	SA17023_14520	SA17024_06135	SA17101_06160	SB17032_02055	SB17033_13120	SB17034_17630	SB17035_11690	SB17036_13260	SB17037_14020	SB17038_14550	SB17039_20870	SB17040_16600	SB17042_16820
sltY		murein transglycosylase	46	46	1	99	8657				1937	1937	1937	2E151-R_10270	HBI01_17020	HBI05_19010	HBI04_22670	HBI02_15060	HBI03_09135	PS148-R_07255	PS15001_20585	PS15002_24810	PS16001_13400	PS16002_24030	PS16003_10930	PS16004_24080	PS16005_23840	PS184-R_09835	PS310-R_10140	PS378-R_10360	PS57-R_08145	RL316_05780	RL320_03840	RL97_04445	SA17021_20895	SA17022_25350	SA17023_23830	SA17024_22085	SA17101_25300	SB17032_28140	SB17033_04365	SB17034_03610	SB17035_13435	SB17036_11990	SB17037_00505	SB17038_16640	SB17039_19015	SB17040_22685	SB17042_03075
ispH		4-hydroxy-3-methylbut-2-enyl diphosphate reductase	46	46	1	99	8700				950	950	950	2E151-R_10470	HBI01_16820	HBI05_22900	HBI04_04225	HBI02_18825	HBI03_18600	PS148-R_07455	PS15001_20785	PS15002_25010	PS16001_13200	PS16002_23830	PS16003_11130	PS16004_23880	PS16005_24040	PS184-R_10035	PS310-R_10340	PS378-R_10160	PS57-R_07945	RL316_05980	RL320_04040	RL97_18295	SA17021_21095	SA17022_25550	SA17023_23630	SA17024_21885	SA17101_12645	SB17032_27935	SB17033_00980	SB17034_03810	SB17035_13635	SB17036_11790	SB17037_00705	SB17038_16840	SB17039_19215	SB17040_22885	SB17042_02875
hisS		histidine--tRNA ligase	46	46	1	99	312				1274	1274	1274	2E151-R_14920	HBI01_20510	HBI05_06245	HBI04_23645	HBI02_09960	HBI03_09570	PS148-R_14485	PS15001_13450	PS15002_08750	PS16001_04330	PS16002_07820	PS16003_07655	PS16004_06970	PS16005_02670	PS184-R_14330	PS310-R_12035	PS378-R_11235	PS57-R_14080	RL316_09825	RL320_26200	RL97_11125	SA17021_03750	SA17022_03670	SA17023_20660	SA17024_02710	SA17101_05490	SB17032_15345	SB17033_07945	SB17034_11770	SB17035_20295	SB17036_04585	SB17037_05280	SB17038_07170	SB17039_08995	SB17040_00790	SB17042_00440
pdxH		pyridoxamine 5'-phosphate oxidase	46	46	1	99	3036				656	656	656	2E151-R_06740	HBI01_03210	HBI05_23530	HBI04_08960	HBI02_08990	HBI03_10415	PS148-R_11100	PS15001_25745	PS15002_08040	PS16001_22520	PS16002_22065	PS16003_25880	PS16004_12845	PS16005_05420	PS184-R_00045	PS310-R_02680	PS378-R_17335	PS57-R_08340	RL316_22595	RL320_17135	RL97_25790	SA17021_07580	SA17022_19845	SA17023_18125	SA17024_10800	SA17101_21375	SB17032_20940	SB17033_16960	SB17034_05570	SB17035_12240	SB17036_25315	SB17037_08480	SB17038_08530	SB17039_15610	SB17040_15375	SB17042_11290
nagK		N-acetylglucosamine kinase	46	46	1	99	2744				911	911	911	2E151-R_03820	HBI01_23445	HBI05_14985	HBI04_20875	HBI02_25295	HBI03_17375	PS148-R_05580	PS15001_22065	PS15002_01265	PS16001_12050	PS16002_09740	PS16003_15850	PS16004_17565	PS16005_21480	PS184-R_06545	PS310-R_06850	PS378-R_03910	PS57-R_02130	RL316_24125	RL320_22850	RL97_07005	SA17021_13795	SA17022_08415	SA17023_02355	SA17024_17185	SA17101_03020	SB17032_04625	SB17033_12340	SB17034_19005	SB17035_05370	SB17036_17735	SB17037_10085	SB17038_12245	SB17039_04025	SB17040_11665	SB17042_09935
pstC		phosphate ABC transporter permease PstC	46	46	1	99	4688				959	959	959	2E151-R_08490	HBI01_09880	HBI05_22150	HBI04_23230	HBI02_20515	HBI03_12910	PS148-R_06950	PS15001_11200	PS15002_15300	PS16001_00155	PS16002_01550	PS16003_24100	PS16004_09270	PS16005_01760	PS184-R_08405	PS310-R_08710	PS378-R_07905	PS57-R_06815	RL316_01570	RL320_07395	RL97_07940	SA17021_14200	SA17022_01160	SA17023_05025	SA17024_03715	SA17101_00985	SB17032_12795	SB17033_02385	SB17034_13415	SB17035_10365	SB17036_01455	SB17037_21895	SB17038_11465	SB17039_01225	SB17040_05670	SB17042_15775
yidC		membrane protein insertase YidC	46	46	1	99	4714				1646	1646	1646	2E151-R_08380	HBI01_09770	HBI05_08970	HBI04_02310	HBI02_06375	HBI03_20280	PS148-R_06840	PS15001_11310	PS15002_15410	PS16001_00265	PS16002_01440	PS16003_03320	PS16004_08125	PS16005_01650	PS184-R_08515	PS310-R_08820	PS378-R_08015	PS57-R_06705	RL316_01680	RL320_07505	RL97_07830	SA17021_14310	SA17022_01050	SA17023_04915	SA17024_03825	SA17101_01100	SB17032_10505	SB17033_02275	SB17034_13525	SB17035_10475	SB17036_01345	SB17037_21785	SB17038_11355	SB17039_01335	SB17040_05560	SB17042_15885
fdoH		formate dehydrogenase O subunit beta	46	46	1	99	1055				902	902	902	2E151-R_20830	HBI01_10205	HBI05_07840	HBI04_11710	HBI02_13855	HBI03_04160	PS148-R_21070	PS15001_16340	PS15002_00925	PS16001_11340	PS16002_05550	PS16003_00735	PS16004_06210	PS16005_03760	PS184-R_20930	PS310-R_17525	PS378-R_21295	PS57-R_20890	RL316_03680	RL320_15760	RL97_01485	SA17021_17035	SA17022_11760	SA17023_07305	SA17024_10150	SA17101_09075	SB17032_09550	SB17033_18350	SB17034_24330	SB17035_09855	SB17036_07135	SB17037_09205	SB17038_04565	SB17039_00255	SB17040_08680	SB17042_20540
Lactoylglutathione lyase		Lactoylglutathione lyase	46	46	1	99	3023				407	407	407	2E151-R_06675	HBI01_03145	HBI05_23465	HBI04_08895	HBI02_08925	HBI03_18845	PS148-R_11035	PS15001_25680	PS15002_07975	PS16001_22455	PS16002_22000	PS16003_25815	PS16004_12910	PS16005_05485	PS184-R_00110	PS310-R_02615	PS378-R_17400	PS57-R_08405	RL316_22530	RL320_17200	RL97_25855	SA17021_07515	SA17022_19910	SA17023_18190	SA17024_10865	SA17101_21440	SB17032_20875	SB17033_17025	SB17034_05635	SB17035_12305	SB17036_25380	SB17037_08415	SB17038_08465	SB17039_15675	SB17040_15310	SB17042_11225
tdh		L-threonine 3-dehydrogenase	46	46	1	99	6656				1025	1025	1025	2E151-R_07745	HBI01_10065	HBI05_10110	HBI04_20365	HBI02_13170	HBI03_20335	PS148-R_06205	PS15001_05515	PS15002_06430	PS16001_00900	PS16002_00805	PS16003_03955	PS16004_05230	PS16005_00530	PS184-R_09150	PS310-R_09455	PS378-R_08650	PS57-R_06070	RL316_02960	RL320_09535	RL97_14635	SA17021_14945	SA17022_00415	SA17023_15305	SA17024_04460	SA17101_08480	SB17032_18650	SB17033_01640	SB17034_02285	SB17035_05995	SB17036_00710	SB17037_21150	SB17038_21635	SB17039_01970	SB17040_04925	SB17042_19440
yieP		Uncharacterized HTH-type transcriptional regulator YieP	46	46	1	99	4659				692	692	692	2E151-R_08640	HBI01_10030	HBI05_22320	HBI04_23380	HBI02_17045	HBI03_10385	PS148-R_07100	PS15001_11050	PS15002_15150	PS16001_00005	PS16002_01700	PS16003_23950	PS16004_09420	PS16005_01910	PS184-R_08255	PS310-R_08560	PS378-R_07755	PS57-R_06965	RL316_01420	RL320_07245	RL97_08090	SA17021_14050	SA17022_01310	SA17023_05175	SA17024_03565	SA17101_00820	SB17032_12645	SB17033_02535	SB17034_13265	SB17035_10215	SB17036_01605	SB17037_22045	SB17038_11615	SB17039_01075	SB17040_05820	SB17042_15630
iap		alkaline phosphatase isozyme conversion aminopeptidase	46	46	1	99	8116				1037	1037	1037	2E151-R_16375	HBI01_08965	HBI05_15650	HBI04_19065	HBI02_17820	HBI03_18265	PS148-R_16020	PS15001_06055	PS15002_00380	PS16001_01665	PS16002_17615	PS16003_17960	PS16004_11580	PS16005_07350	PS184-R_15865	PS310-R_18150	PS378-R_15640	PS57-R_15460	RL316_18345	RL320_21395	RL97_14785	SA17021_19735	SA17022_08185	SA17023_15955	SA17024_25045	SA17101_06530	SB17032_01715	SB17033_13550	SB17034_15205	SB17035_19430	SB17036_06155	SB17037_19570	SB17038_10915	SB17039_06470	SB17040_11225	SB17042_17160
guaA		glutamine-hydrolyzing GMP synthase	46	46	1	99	328				1577	1577	1577	2E151-R_14870	HBI01_20560	HBI05_06190	HBI04_02485	HBI02_01195	HBI03_23040	PS148-R_14535	PS15001_13500	PS15002_08700	PS16001_04280	PS16002_07770	PS16003_07605	PS16004_01495	PS16005_09975	PS184-R_14380	PS310-R_11985	PS378-R_11185	PS57-R_14030	RL316_09875	RL320_26250	RL97_11175	SA17021_03800	SA17022_03620	SA17023_20710	SA17024_02760	SA17101_05455	SB17032_15310	SB17033_07995	SB17034_11820	SB17035_20345	SB17036_04535	SB17037_05330	SB17038_07120	SB17039_08945	SB17040_00840	SB17042_00475
fumC		class II fumarate hydratase	46	46	1	99	3068				1403	1403	1403	2E151-R_06875	HBI01_00620	HBI05_04180	HBI04_05805	HBI02_09130	HBI03_12795	PS148-R_19625	PS15001_25880	PS15002_09080	PS16001_22655	PS16002_22200	PS16003_26015	PS16004_12710	PS16005_05285	PS184-R_19730	PS310-R_02815	PS378-R_20095	PS57-R_18745	RL316_22730	RL320_17000	RL97_25655	SA17021_06620	SA17022_19705	SA17023_17990	SA17024_10665	SA17101_21235	SB17032_22740	SB17033_16825	SB17034_05435	SB17035_12105	SB17036_25180	SB17037_08615	SB17038_08665	SB17039_15475	SB17040_15510	SB17042_22820
cgtA		Obg family GTPase CgtA	46	46	1	99	9077				1172	1172	1172	2E151-R_01595	HBI01_07215	HBI05_13505	HBI04_01875	HBI02_24510	HBI03_19000	PS148-R_00445	PS15001_07045	PS15002_22080	PS16001_10155	PS16002_25985	PS16003_02205	PS16004_03890	PS16005_08710	PS184-R_03180	PS310-R_04630	PS378-R_00445	PS57-R_00445	RL316_26435	RL320_23970	RL97_17305	SA17021_09495	SA17022_06080	SA17023_06390	SA17024_09440	SA17101_11320	SB17032_16740	SB17033_23190	SB17034_09895	SB17035_24325	SB17036_16365	SB17037_16625	SB17038_01760	SB17039_04920	SB17040_07945	SB17042_05460
qmcA		Protein QmcA	46	46	1	99	2053				917	917	917	2E151-R_12410	HBI01_14490	HBI05_15180	HBI04_03890	HBI02_12560	HBI03_22770	PS148-R_12130	PS15001_01750	PS15002_04125	PS16001_06960	PS16002_01715	PS16003_10765	PS16004_00265	PS16005_17335	PS184-R_11980	PS310-R_13380	PS378-R_11630	PS57-R_10525	RL316_00450	RL320_10760	RL97_13690	SA17021_04495	SA17022_23660	SA17023_12170	SA17024_07835	SA17101_14580	SB17032_07275	SB17033_09400	SB17034_08625	SB17035_08125	SB17036_06290	SB17037_23615	SB17038_25245	SB17039_11080	SB17040_00395	SB17042_18175
clpB		ATP-dependent chaperone ClpB	46	46	1	99	7835				2573	2573	2573	2E151-R_21645	HBI01_02690	HBI05_12920	HBI04_00205	HBI02_14315	HBI03_00065	PS148-R_21915	PS15001_10740	PS15002_17575	PS16001_26205	PS16002_07745	PS16003_24120	PS16004_11020	PS16005_03240	PS184-R_22065	PS310-R_22370	PS378-R_22110	PS57-R_22025	RL316_17635	RL320_05945	RL97_16415	SA17021_11280	SA17022_14605	SA17023_14240	SA17024_06415	SA17101_05840	SB17032_03265	SB17033_12840	SB17034_17910	SB17035_23225	SB17036_13540	SB17037_13740	SB17038_14270	SB17039_21150	SB17040_16885	SB17042_23560
punC		purine nucleoside transporter PunC	46	46	1	99	3013				1211	1211	1211	2E151-R_06625	HBI01_03095	HBI05_23410	HBI04_08845	HBI02_08870	HBI03_18795	PS148-R_10985	PS15001_25630	PS15002_07925	PS16001_22405	PS16002_21950	PS16003_25765	PS16004_10255	PS16005_05535	PS184-R_00160	PS310-R_02565	PS378-R_17450	PS57-R_08455	RL316_22480	RL320_17250	RL97_25905	SA17021_07465	SA17022_19960	SA17023_18240	SA17024_10915	SA17101_21495	SB17032_20815	SB17033_17075	SB17034_05685	SB17035_12355	SB17036_17845	SB17037_08365	SB17038_08415	SB17039_15725	SB17040_15260	SB17042_11170
mqo		malate dehydrogenase (quinone)	46	46	1	99	10341				1646	1646	1646	2E151-R_04635	HBI01_18025	HBI05_21680	HBI04_17455	HBI02_09475	HBI03_12165	PS148-R_02915	PS15001_14835	PS15002_03590	PS16001_02945	PS16002_11430	PS16003_06265	PS16004_02580	PS16005_14900	PS184-R_07535	PS310-R_07665	PS378-R_02915	PS57-R_04815	RL316_15085	RL320_13095	RL97_05515	SA17021_13240	SA17022_02285	SA17023_09480	SA17024_14615	SA17101_04010	SB17032_15790	SB17033_18580	SB17034_18620	SB17035_21685	SB17036_02925	SB17037_06670	SB17038_05785	SB17039_03080	SB17040_02175	SB17042_01920
hflD		high frequency lysogenization protein HflD	46	46	1	99	3678				641	641	641	2E151-R_03885	HBI01_23380	HBI05_15055	HBI04_20940	HBI02_24860	HBI03_22905	PS148-R_05645	PS15001_22000	PS15002_01200	PS16001_12115	PS16002_09675	PS16003_15785	PS16004_17630	PS16005_25505	PS184-R_06610	PS310-R_06915	PS378-R_03845	PS57-R_02065	RL316_24060	RL320_22785	RL97_07070	SA17021_13730	SA17022_08350	SA17023_02420	SA17024_17250	SA17101_03085	SB17032_04680	SB17033_12405	SB17034_18940	SB17035_05435	SB17036_17800	SB17037_10020	SB17038_12180	SB17039_03960	SB17040_11730	SB17042_09990
treR		trehalose operon repressor TreR	46	46	1	99	6547				947	947	947	2E151-R_12840	HBI01_02240	HBI05_02860	HBI04_09985	HBI02_04760	HBI03_11985	PS148-R_12755	PS15001_17900	PS15002_05370	PS16001_20245	PS16002_04910	PS16003_22465	PS16004_08830	PS16005_15805	PS184-R_12410	PS310-R_14005	PS378-R_13015	PS57-R_10955	RL316_09165	RL320_02545	RL97_15270	SA17021_05850	SA17022_10700	SA17023_13610	SA17024_23145	SA17101_24260	SB17032_08500	SB17033_10530	SB17034_08405	SB17035_00670	SB17036_24795	SB17037_04845	SB17038_14060	SB17039_06810	SB17040_06830	SB17042_19010
lpxH		UDP-2,3-diacylglucosamine diphosphatase	46	46	1	99	2096				722	722	722	2E151-R_25995	HBI01_12310	HBI05_12255	HBI04_21885	HBI02_13305	HBI03_03475	PS148-R_25945	PS15001_18240	PS15002_14905	PS16001_15875	PS16002_06885	PS16003_15595	PS16004_16655	PS16005_22100	PS184-R_24060	PS310-R_25980	PS378-R_26010	PS57-R_25915	RL316_21010	RL320_01630	RL97_19470	SA17021_23255	SA17022_23845	SA17023_20200	SA17024_18995	SA17101_09915	SB17032_26240	SB17033_12465	SB17034_13845	SB17035_14855	SB17036_18535	SB17037_25690	SB17038_25060	SB17039_25625	SB17040_25810	SB17042_18330
der		ribosome biogenesis GTPase Der	46	46	1	99	324				1472	1472	1472	2E151-R_14905	HBI01_20525	HBI05_06230	HBI04_23630	HBI02_09945	HBI03_09555	PS148-R_14500	PS15001_13465	PS15002_08735	PS16001_04315	PS16002_07805	PS16003_07640	PS16004_06985	PS16005_02655	PS184-R_14345	PS310-R_12020	PS378-R_11220	PS57-R_14065	RL316_09840	RL320_26215	RL97_11140	SA17021_03765	SA17022_03655	SA17023_20675	SA17024_02725	SA17101_05475	SB17032_15330	SB17033_07960	SB17034_11785	SB17035_20310	SB17036_04570	SB17037_05295	SB17038_07155	SB17039_08980	SB17040_00805	SB17042_00455
nadK		NAD(+) kinase	46	46	1	99	7886				878	878	878	2E151-R_21755	HBI01_02800	HBI05_13035	HBI04_02835	HBI02_14430	HBI03_07040	PS148-R_21805	PS15001_10630	PS15002_17685	PS16001_26315	PS16002_07635	PS16003_24230	PS16004_10910	PS16005_03130	PS184-R_21955	PS310-R_22480	PS378-R_22220	PS57-R_21915	RL316_17745	RL320_05835	RL97_16525	SA17021_11170	SA17022_14715	SA17023_14350	SA17024_06305	SA17101_05955	SB17032_03150	SB17033_12950	SB17034_17800	SB17035_11520	SB17036_13430	SB17037_13850	SB17038_14380	SB17039_21040	SB17040_16770	SB17042_23675
citC		[citrate (pro-3S)-lyase] ligase	46	46	1	99	1523				1058	1058	1058	2E151-R_17810	HBI01_21245	HBI05_02225	HBI04_04110	HBI02_01715	HBI03_12325	PS148-R_17280	PS15001_08845	PS15002_10400	PS16001_16130	PS16002_05850	PS16003_13465	PS16004_15965	PS16005_14935	PS184-R_17125	PS310-R_19580	PS378-R_17075	PS57-R_16970	RL316_07705	RL320_21995	RL97_10190	SA17021_02260	SA17022_07285	SA17023_13270	SA17024_01865	SA17101_23345	SB17032_17850	SB17033_05720	SB17034_21405	SB17035_07645	SB17036_02125	SB17037_12225	SB17038_03685	SB17039_10695	SB17040_21035	SB17042_06740
aroP		aromatic amino acid transporter AroP	46	46	1	99	8860				1370	1370	1370	2E151-R_10940	HBI01_16345	HBI05_11075	HBI04_20090	HBI02_07600	HBI03_14190	PS148-R_07930	PS15001_12365	PS15002_25480	PS16001_12725	PS16002_23355	PS16003_11605	PS16004_23405	PS16005_24515	PS184-R_10510	PS310-R_10810	PS378-R_09685	PS57-R_07470	RL316_06450	RL320_04515	RL97_18765	SA17021_21570	SA17022_26025	SA17023_23155	SA17024_21410	SA17101_13085	SB17032_27455	SB17033_00505	SB17034_00405	SB17035_14110	SB17036_11310	SB17037_01180	SB17038_17320	SB17039_19690	SB17040_23360	SB17042_02400
yijD		YijD family membrane protein	46	46	1	99	924				359	359	359	2E151-R_20090	HBI01_25745	HBI05_18845	HBI04_07820	HBI02_13490	HBI03_22260	PS148-R_20640	PS15001_15940	PS15002_00525	PS16001_10940	PS16002_05150	PS16003_00335	PS16004_21830	PS16005_04160	PS184-R_20190	PS310-R_17130	PS378-R_20555	PS57-R_19735	RL316_04080	RL320_16160	RL97_12595	SA17021_16635	SA17022_11360	SA17023_24285	SA17024_12815	SA17101_22230	SB17032_09145	SB17033_06415	SB17034_23920	SB17035_09455	SB17036_07535	SB17037_09605	SB17038_04165	SB17039_00655	SB17040_09080	SB17042_20290
nrdD		anaerobic ribonucleoside-triphosphate reductase	46	46	1	99	6550				2138	2138	2138	2E151-R_12825	HBI01_02255	HBI05_02875	HBI04_10005	HBI02_04775	HBI03_12000	PS148-R_12770	PS15001_17885	PS15002_05385	PS16001_20260	PS16002_04895	PS16003_22480	PS16004_08845	PS16005_15790	PS184-R_12395	PS310-R_14020	PS378-R_13000	PS57-R_10940	RL316_09150	RL320_02530	RL97_15285	SA17021_05865	SA17022_10715	SA17023_13625	SA17024_23160	SA17101_24245	SB17032_08485	SB17033_10545	SB17034_08390	SB17035_00655	SB17036_24780	SB17037_04830	SB17038_14045	SB17039_06825	SB17040_06845	SB17042_19025
fryB		PTS system fructose-like EIIB component 1	46	46	1	99	475				326	326	326	2E151-R_05480	HBI01_05800	HBI05_05765	HBI04_16570	HBI02_08600	HBI03_23460	PS148-R_03760	PS15001_13990	PS15002_08210	PS16001_03790	PS16002_06450	PS16003_07110	PS16004_01005	PS16005_10465	PS184-R_06690	PS310-R_08510	PS378-R_03760	PS57-R_03970	RL316_10365	RL320_26740	RL97_13030	SA17021_04290	SA17022_03130	SA17023_10325	SA17024_18305	SA17101_04855	SB17032_14495	SB17033_21765	SB17034_12310	SB17035_20835	SB17036_14870	SB17037_05820	SB17038_06630	SB17039_09650	SB17040_01330	SB17042_01055
ychF		redox-regulated ATPase YchF	46	46	1	99	6057				1091	1091	1091	2E151-R_18980	HBI01_08420	HBI05_25125	HBI04_25490	HBI02_07320	HBI03_17895	PS148-R_18225	PS15001_04810	PS15002_19020	PS16001_25740	PS16002_08575	PS16003_16825	PS16004_00060	PS16005_04525	PS184-R_18070	PS310-R_15520	PS378-R_18135	PS57-R_17670	RL316_13635	RL320_25580	RL97_21780	SA17021_24755	SA17022_18470	SA17023_02685	SA17024_20630	SA17101_19680	SB17032_12425	SB17033_07290	SB17034_12885	SB17035_16450	SB17036_09640	SB17037_19030	SB17038_00410	SB17039_25275	SB17040_03995	SB17042_10280
znuB		zinc ABC transporter permease subunit ZnuB	46	46	1	99	9537				785	785	785	2E151-R_09945	HBI01_00945	HBI05_15890	HBI04_03305	HBI02_22335	HBI03_01820	PS148-R_09715	PS15001_03795	PS15002_16475	PS16001_07150	PS16002_20670	PS16003_20755	PS16004_16550	PS16005_20695	PS184-R_01440	PS310-R_01285	PS378-R_06985	PS57-R_12440	RL316_12300	RL320_10435	RL97_10565	SA17021_08525	SA17022_21240	SA17023_19520	SA17024_12195	SA17101_00390	SB17032_19750	SB17033_15735	SB17034_04500	SB17035_03765	SB17036_22750	SB17037_02495	SB17038_19680	SB17039_17005	SB17040_13965	SB17042_13480
hypD		hydrogenase formation protein HypD	46	46	1	99	8076				1121	1121	1121	2E151-R_16170	HBI01_08815	HBI05_15525	HBI04_21205	HBI02_17695	HBI03_10815	PS148-R_16225	PS15001_10240	PS15002_18075	PS16001_01465	PS16002_15030	PS16003_24620	PS16004_18395	PS16005_11610	PS184-R_16065	PS310-R_17950	PS378-R_15440	PS57-R_15665	RL316_18140	RL320_05440	RL97_11520	SA17021_10780	SA17022_15115	SA17023_14745	SA17024_05910	SA17101_06385	SB17032_01835	SB17033_13345	SB17034_14190	SB17035_22725	SB17036_13030	SB17037_14250	SB17038_14780	SB17039_20640	SB17040_16370	SB17042_17040
gpsA		NAD(P)H-dependent glycerol-3-phosphate dehydrogenase	46	46	1	99	6664				1019	1019	1019	2E151-R_07705	HBI01_10105	HBI05_10070	HBI04_20405	HBI02_13130	HBI03_21025	PS148-R_06165	PS15001_05475	PS15002_06470	PS16001_00940	PS16002_00765	PS16003_03995	PS16004_05270	PS16005_00490	PS184-R_09190	PS310-R_09495	PS378-R_08690	PS57-R_06030	RL316_02920	RL320_09575	RL97_14595	SA17021_14985	SA17022_00375	SA17023_15265	SA17024_04500	SA17101_08520	SB17032_18690	SB17033_01600	SB17034_02325	SB17035_05955	SB17036_00670	SB17037_21110	SB17038_21675	SB17039_02010	SB17040_04885	SB17042_19480
hflX		GTPase HflX	46	46	1	99	4169				1280	1280	1280	2E151-R_12465	HBI01_02615	HBI05_21990	HBI04_19270	HBI02_04655	HBI03_13510	PS148-R_13130	PS15001_17525	PS15002_05745	PS16001_20620	PS16002_04535	PS16003_22840	PS16004_09205	PS16005_15430	PS184-R_12035	PS310-R_14380	PS378-R_12640	PS57-R_10580	RL316_08790	RL320_02170	RL97_15645	SA17021_06225	SA17022_11075	SA17023_13985	SA17024_23520	SA17101_23900	SB17032_08145	SB17033_09350	SB17034_08030	SB17035_00295	SB17036_24420	SB17037_04470	SB17038_13685	SB17039_07185	SB17040_07205	SB17042_14015
adiC		arginine/agmatine antiporter	46	46	1	99	8230				1337	1337	1337	2E151-R_20700	HBI01_21815	HBI05_20030	HBI04_23915	HBI02_03795	HBI03_07905	PS148-R_20940	PS15001_02070	PS15002_11955	PS16001_08770	PS16002_03420	PS16003_05225	PS16004_17980	PS16005_12935	PS184-R_20800	PS310-R_22015	PS378-R_21165	PS57-R_20540	RL316_23185	RL320_06030	RL97_22300	SA17021_11345	SA17022_04790	SA17023_01460	SA17024_02825	SA17101_08275	SB17032_23555	SB17033_08280	SB17034_01695	SB17035_15200	SB17036_08410	SB17037_15015	SB17038_09010	SB17039_07530	SB17040_05885	SB17042_21985
rmuC		DNA recombination protein RmuC	46	46	1	99	4363				1427	1427	1427	2E151-R_18120	HBI01_22845	HBI05_20430	HBI04_00765	HBI02_19985	HBI03_13645	PS148-R_18485	PS15001_24195	PS15002_23550	PS16001_24595	PS16002_24275	PS16003_26470	PS16004_22085	PS16005_26115	PS184-R_18330	PS310-R_20275	PS378-R_19090	PS57-R_17930	RL316_08410	RL320_08915	RL97_11400	SA17021_26345	SA17022_13615	SA17023_22735	SA17024_13370	SA17101_09700	SB17032_00455	SB17033_20245	SB17034_22360	SB17035_25740	SB17036_16655	SB17037_23045	SB17038_15340	SB17039_14535	SB17040_12205	SB17042_17295
mdh		malate dehydrogenase	46	46	1	99	9029				938	938	938	2E151-R_01825	HBI01_07445	HBI05_13745	HBI04_02105	HBI02_03150	HBI03_19230	PS148-R_00215	PS15001_07275	PS15002_22310	PS16001_10385	PS16002_26215	PS16003_02435	PS16004_04120	PS16005_08940	PS184-R_02950	PS310-R_04860	PS378-R_00215	PS57-R_00215	RL316_26665	RL320_23740	RL97_17535	SA17021_09265	SA17022_06310	SA17023_06620	SA17024_09670	SA17101_11560	SB17032_16500	SB17033_22960	SB17034_09820	SB17035_24555	SB17036_16135	SB17037_16855	SB17038_01530	SB17039_05150	SB17040_07715	SB17042_05220
pntB		Re/Si-specific NAD(P)(+) transhydrogenase subunit beta	46	46	1	99	3079				1388	1388	1388	2E151-R_06920	HBI01_00575	HBI05_04135	HBI04_05850	HBI02_09175	HBI03_12840	PS148-R_19670	PS15001_25925	PS15002_09125	PS16001_22700	PS16002_22245	PS16003_26060	PS16004_12665	PS16005_05240	PS184-R_19685	PS310-R_02860	PS378-R_20050	PS57-R_18700	RL316_22775	RL320_16955	RL97_25610	SA17021_06665	SA17022_19660	SA17023_17945	SA17024_10620	SA17101_21190	SB17032_22695	SB17033_16780	SB17034_05390	SB17035_12060	SB17036_25135	SB17037_08660	SB17038_08710	SB17039_15430	SB17040_15555	SB17042_22865
btsS		two-component regulatory system sensor histidine kinase BtsS	46	46	1	99	11				1685	1685	1685	2E151-R_04190	HBI01_18470	HBI05_09770	HBI04_17015	HBI02_06045	HBI03_06090	PS148-R_02470	PS15001_15280	PS15002_04035	PS16001_02500	PS16002_15650	PS16003_05820	PS16004_03025	PS16005_19225	PS184-R_07980	PS310-R_07220	PS378-R_02470	PS57-R_05260	RL316_15530	RL320_12570	RL97_05960	SA17021_12795	SA17022_01840	SA17023_09030	SA17024_19890	SA17101_03580	SB17032_24430	SB17033_19025	SB17034_14525	SB17035_22130	SB17036_03370	SB17037_07115	SB17038_05340	SB17039_03525	SB17040_02620	SB17042_08335
treF		Cytoplasmic trehalase	46	46	1	99	7083				1649	1649	1649	2E151-R_07220	HBI01_11170	HBI05_01355	HBI04_03530	HBI02_24140	HBI03_01070	PS148-R_05680	PS15001_12890	PS15002_11310	PS16001_01425	PS16002_00280	PS16003_04480	PS16004_05750	PS16005_00010	PS184-R_09675	PS310-R_09980	PS378-R_09175	PS57-R_05545	RL316_02435	RL320_10060	RL97_23685	SA17021_15465	SA17022_17105	SA17023_14780	SA17024_14775	SA17101_26185	SB17032_19225	SB17033_01115	SB17034_17525	SB17035_05470	SB17036_13885	SB17037_20630	SB17038_22160	SB17039_02495	SB17040_04400	SB17042_03950
mdtH		multidrug efflux MFS transporter MdtH	46	46	1	99	666				1208	1208	1208	2E151-R_03550	HBI01_23715	HBI05_14705	HBI04_12310	HBI02_00420	HBI03_02470	PS148-R_05310	PS15001_22335	PS15002_01535	PS16001_11780	PS16002_10010	PS16003_12330	PS16004_19690	PS16005_18530	PS184-R_06275	PS310-R_06580	PS378-R_04180	PS57-R_02400	RL316_24395	RL320_23120	RL97_06735	SA17021_00215	SA17022_08685	SA17023_02085	SA17024_16910	SA17101_02745	SB17032_04355	SB17033_02715	SB17034_19275	SB17035_05100	SB17036_20915	SB17037_02795	SB17038_12515	SB17039_23555	SB17040_18915	SB17042_09665
bax		protein bax	46	46	1	99	7153				824	824	824	2E151-R_07505	HBI01_06420	HBI05_16195	HBI04_03675	HBI02_16235	HBI03_08165	PS148-R_05965	PS15001_05275	PS15002_06670	PS16001_01140	PS16002_00565	PS16003_04195	PS16004_05470	PS16005_00290	PS184-R_09390	PS310-R_09695	PS378-R_08890	PS57-R_05830	RL316_02720	RL320_09775	RL97_23970	SA17021_15185	SA17022_00175	SA17023_15065	SA17024_04700	SA17101_13685	SB17032_18895	SB17033_01400	SB17034_02525	SB17035_05755	SB17036_00470	SB17037_20910	SB17038_21875	SB17039_02210	SB17040_04685	SB17042_03620
yhfK		Uncharacterized protein YhfK	46	46	1	99	6872				2090	2090	2090	2E151-R_14290	HBI01_22680	HBI05_17585	HBI04_11165	HBI02_12250	HBI03_19335	PS148-R_13270	PS15001_11595	PS15002_22640	PS16001_13800	PS16002_18895	PS16003_13350	PS16004_14270	PS16005_06455	PS184-R_13855	PS310-R_14515	PS378-R_13730	PS57-R_13450	RL316_19640	RL320_13505	RL97_01095	SA17021_16315	SA17022_16260	SA17023_07800	SA17024_05745	SA17101_15060	SB17032_03930	SB17033_10965	SB17034_16545	SB17035_03375	SB17036_23960	SB17037_25420	SB17038_18685	SB17039_13410	SB17040_25640	SB17042_04935
gntR		gluconate operon transcriptional repressor GntR	46	46	1	99	6960				995	995	995	2E151-R_13905	HBI01_03885	HBI05_17995	HBI04_18830	HBI02_20595	HBI03_14635	PS148-R_13655	PS15001_02940	PS15002_23025	PS16001_14185	PS16002_18510	PS16003_12965	PS16004_18980	PS16005_06070	PS184-R_13470	PS310-R_14900	PS378-R_14115	PS57-R_13065	RL316_20025	RL320_13890	RL97_00500	SA17021_15930	SA17022_16645	SA17023_08185	SA17024_05360	SA17101_26630	SB17032_03540	SB17033_11350	SB17034_25860	SB17035_02990	SB17036_23575	SB17037_25035	SB17038_18300	SB17039_13795	SB17040_25255	SB17042_04545
cysG		siroheme synthase CysG	46	46	1	99	6883				1373	1373	1373	2E151-R_14235	HBI01_22735	HBI05_17640	HBI04_11220	HBI02_12305	HBI03_10470	PS148-R_13325	PS15001_11540	PS15002_22695	PS16001_13855	PS16002_18840	PS16003_13295	PS16004_14215	PS16005_06400	PS184-R_13800	PS310-R_14570	PS378-R_13785	PS57-R_13395	RL316_19695	RL320_13560	RL97_01150	SA17021_16260	SA17022_16315	SA17023_07855	SA17024_05690	SA17101_15115	SB17032_03875	SB17033_11020	SB17034_16600	SB17035_03320	SB17036_23905	SB17037_25365	SB17038_18630	SB17039_13465	SB17040_25585	SB17042_04880
rnhA		ribonuclease HI	46	46	1	99	3562				467	467	467	2E151-R_24850	HBI01_20610	HBI05_01495	HBI04_15290	HBI02_14760	HBI03_03815	PS148-R_24390	PS15001_16825	PS15002_12175	PS16001_24855	PS16002_12180	PS16003_14115	PS16004_24530	PS16005_12155	PS184-R_24940	PS310-R_24620	PS378-R_24965	PS57-R_24760	RL316_20645	RL320_18195	RL97_02525	SA17021_01470	SA17022_12995	SA17023_17360	SA17024_00580	SA17101_16340	SB17032_25770	SB17033_16305	SB17034_07505	SB17035_09395	SB17036_15635	SB17037_09725	SB17038_07655	SB17039_20400	SB17040_18055	SB17042_26430
dlsT		putative serine transporter	46	46	1	99	9149				1331	1331	1331	2E151-R_01250	HBI01_06870	HBI05_22825	HBI04_24455	HBI02_11245	HBI03_07955	PS148-R_00790	PS15001_06700	PS15002_21735	PS16001_09810	PS16002_25640	PS16003_01860	PS16004_03545	PS16005_08365	PS184-R_03525	PS310-R_04285	PS378-R_00790	PS57-R_00790	RL316_26090	RL320_24315	RL97_16960	SA17021_09840	SA17022_05735	SA17023_06045	SA17024_09095	SA17101_10945	SB17032_17120	SB17033_23535	SB17034_06525	SB17035_23980	SB17036_18580	SB17037_16280	SB17038_02105	SB17039_04575	SB17040_08290	SB17042_05835
nrdA		ribonucleoside-diphosphate reductase subunit alpha	46	46	1	99	10315				2285	2285	2285	2E151-R_04765	HBI01_24895	HBI05_21545	HBI04_22565	HBI02_25420	HBI03_02755	PS148-R_03045	PS15001_14705	PS15002_03460	PS16001_03075	PS16002_11560	PS16003_06395	PS16004_02450	PS16005_18180	PS184-R_07405	PS310-R_07795	PS378-R_03045	PS57-R_04685	RL316_14955	RL320_13225	RL97_13575	SA17021_22690	SA17022_02415	SA17023_09610	SA17024_14485	SA17101_04115	SB17032_13755	SB17033_12120	SB17034_18750	SB17035_21555	SB17036_15585	SB17037_06540	SB17038_05915	SB17039_02950	SB17040_02045	SB17042_01790
ycbJ		Uncharacterized protein YcbJ	46	46	1	99	829				893	893	893	2E151-R_02905	HBI01_01550	HBI05_04910	HBI04_00150	HBI02_18925	HBI03_21250	PS148-R_04665	PS15001_22980	PS15002_02180	PS16001_05255	PS16002_10655	PS16003_15115	PS16004_14575	PS16005_02155	PS184-R_05630	PS310-R_05935	PS378-R_04825	PS57-R_03045	RL316_16630	RL320_14655	RL97_06090	SA17021_00665	SA17022_09330	SA17023_16335	SA17024_16265	SA17101_02050	SB17032_21480	SB17033_03360	SB17034_19920	SB17035_04455	SB17036_10630	SB17037_03440	SB17038_13160	SB17039_22910	SB17040_19560	SB17042_15535
livJ		branched chain amino acid ABC transporter substrate-binding protein LivJ	46	46	1	99	6983				1103	1103	1103	2E151-R_13805	HBI01_03985	HBI05_18385	HBI04_18300	HBI02_06995	HBI03_11685	PS148-R_13755	PS15001_02840	PS15002_23125	PS16001_14285	PS16002_18410	PS16003_12865	PS16004_18880	PS16005_05970	PS184-R_13370	PS310-R_15000	PS378-R_14215	PS57-R_12965	RL316_20125	RL320_13990	RL97_00600	SA17021_15830	SA17022_16745	SA17023_08285	SA17024_05260	SA17101_26510	SB17032_03435	SB17033_11450	SB17034_25760	SB17035_02890	SB17036_23475	SB17037_24935	SB17038_18200	SB17039_13895	SB17040_25155	SB17042_04440
speE		polyamine aminopropyltransferase	46	46	1	99	8849				866	866	866	2E151-R_11005	HBI01_16280	HBI05_11025	HBI04_18110	HBI02_07550	HBI03_08720	PS148-R_07995	PS15001_12300	PS15002_25545	PS16001_12660	PS16002_23290	PS16003_11670	PS16004_23340	PS16005_24580	PS184-R_10575	PS310-R_10875	PS378-R_09620	PS57-R_07405	RL316_06515	RL320_04580	RL97_24240	SA17021_21640	SA17022_26090	SA17023_12235	SA17024_21345	SA17101_13135	SB17032_27405	SB17033_00440	SB17034_00470	SB17035_14175	SB17036_11245	SB17037_10490	SB17038_17385	SB17039_19755	SB17040_23425	SB17042_02350
cyoC		cytochrome o ubiquinol oxidase subunit III	46	46	1	99	1978				614	614	614	2E151-R_12090	HBI01_14170	HBI05_12585	HBI04_08085	HBI02_26030	HBI03_02065	PS148-R_11810	PS15001_01430	PS15002_04445	PS16001_06640	PS16002_02035	PS16003_10445	PS16004_00585	PS16005_17010	PS184-R_11660	PS310-R_13060	PS378-R_11950	PS57-R_10205	RL316_00770	RL320_11080	RL97_14010	SA17021_04815	SA17022_23340	SA17023_10755	SA17024_07515	SA17101_14270	SB17032_13000	SB17033_09720	SB17034_08945	SB17035_08445	SB17036_06610	SB17037_23935	SB17038_25565	SB17039_11400	SB17040_00075	SB17042_14790
glk		glucokinase	46	46	1	99	474				965	965	965	2E151-R_05485	HBI01_05805	HBI05_05770	HBI04_16575	HBI02_08595	HBI03_23465	PS148-R_03765	PS15001_13985	PS15002_08215	PS16001_03795	PS16002_06455	PS16003_07115	PS16004_01010	PS16005_10460	PS184-R_06685	PS310-R_08515	PS378-R_03765	PS57-R_03965	RL316_10360	RL320_26735	RL97_13035	SA17021_04285	SA17022_03135	SA17023_10330	SA17024_18310	SA17101_04860	SB17032_14500	SB17033_21760	SB17034_12305	SB17035_20830	SB17036_14865	SB17037_05815	SB17038_06635	SB17039_09645	SB17040_01325	SB17042_01050
ispU		(2E,6E)-farnesyl-diphosphate-specific ditrans,polycis-undecaprenyl-diphosphate synthase	46	46	1	99	8764				758	758	758	2E151-R_11300	HBI01_24150	HBI05_01715	HBI04_17840	HBI02_03555	HBI03_17165	PS148-R_08290	PS15001_07425	PS15002_25840	PS16001_12365	PS16002_23005	PS16003_11965	PS16004_23045	PS16005_24875	PS184-R_10870	PS310-R_11170	PS378-R_09325	PS57-R_07110	RL316_06810	RL320_04875	RL97_04955	SA17021_21940	SA17022_26385	SA17023_11695	SA17024_21050	SA17101_13410	SB17032_27130	SB17033_00145	SB17034_00765	SB17035_14470	SB17036_10950	SB17037_10785	SB17038_17680	SB17039_20050	SB17040_23720	SB17042_02075
actS		amidase activator ActS	46	46	1	99	7407				752	755	754	2E151-R_15610	HBI01_15780	HBI05_10890	HBI04_21475	HBI02_23275	HBI03_08945	PS148-R_15330	PS15001_00225	PS15002_14165	PS16001_24155	PS16002_03700	PS16003_08305	PS16004_07160	PS16005_09725	PS184-R_15250	PS310-R_16725	PS378-R_14880	PS57-R_14845	RL316_18975	RL320_20760	RL97_05265	SA17021_20365	SA17022_12570	SA17023_03760	SA17024_24415	SA17101_07180	SB17032_01020	SB17033_14180	SB17034_15835	SB17035_18805	SB17036_05525	SB17037_12610	SB17038_10305	SB17039_05840	SB17040_10595	SB17042_12480
deaD		ATP-dependent RNA helicase DeaD	46	46	1	99	9097				1889	1901	1889	2E151-R_01475	HBI01_07095	HBI05_13385	HBI04_01755	HBI02_24390	HBI03_13030	PS148-R_00565	PS15001_06925	PS15002_21960	PS16001_10035	PS16002_25865	PS16003_02085	PS16004_03770	PS16005_08590	PS184-R_03300	PS310-R_04510	PS378-R_00565	PS57-R_00565	RL316_26315	RL320_24090	RL97_17185	SA17021_09615	SA17022_05960	SA17023_06270	SA17024_09320	SA17101_11200	SB17032_16860	SB17033_23310	SB17034_06300	SB17035_24205	SB17036_16485	SB17037_16505	SB17038_01880	SB17039_04800	SB17040_08065	SB17042_05580
deoC		deoxyribose-phosphate aldolase	46	46	1	99	8642				779	779	779	2E151-R_10215	HBI01_17075	HBI05_18950	HBI04_22735	HBI02_14975	HBI03_09070	PS148-R_07200	PS15001_20530	PS15002_24755	PS16001_13455	PS16002_24085	PS16003_10875	PS16004_24135	PS16005_23785	PS184-R_09780	PS310-R_10085	PS378-R_10415	PS57-R_08200	RL316_05725	RL320_03785	RL97_04500	SA17021_20840	SA17022_25295	SA17023_23885	SA17024_22140	SA17101_25240	SB17032_28205	SB17033_04310	SB17034_03555	SB17035_13380	SB17036_12045	SB17037_00450	SB17038_16585	SB17039_18960	SB17040_22630	SB17042_03135
cls		cardiolipin synthase	46	46	1	99	6109				329	329	329	2E151-R_16780	HBI01_08150	HBI05_25365	HBI04_25250	HBI02_02810	HBI03_12310	PS148-R_16500	PS15001_04535	PS15002_18745	PS16001_25465	PS16002_08850	PS16003_17100	PS16004_12365	PS16005_04800	PS184-R_16345	PS310-R_19015	PS378-R_16510	PS57-R_15940	RL316_13360	RL320_25305	RL97_21505	SA17021_25030	SA17022_18195	SA17023_02960	SA17024_20355	SA17101_19440	SB17032_12095	SB17033_07015	SB17034_13140	SB17035_16725	SB17036_09915	SB17037_18755	SB17038_00685	SB17039_25000	SB17040_03720	SB17042_24285
yheS		ABC transporter ATP-binding protein	46	46	1	99	6866				1913	1913	1913	2E151-R_14320	HBI01_22650	HBI05_17555	HBI04_11135	HBI02_12220	HBI03_19305	PS148-R_13240	PS15001_11625	PS15002_22610	PS16001_13770	PS16002_18925	PS16003_13380	PS16004_14300	PS16005_06485	PS184-R_13885	PS310-R_14485	PS378-R_13700	PS57-R_13480	RL316_19610	RL320_13475	RL97_01065	SA17021_16345	SA17022_16230	SA17023_07770	SA17024_05775	SA17101_15030	SB17032_03960	SB17033_10935	SB17034_16515	SB17035_03405	SB17036_23990	SB17037_25450	SB17038_18715	SB17039_13380	SB17040_25670	SB17042_04965
tdcF		enamine/imine deaminase	46	46	1	99	9147				389	389	389	2E151-R_01260	HBI01_06880	HBI05_22835	HBI04_24465	HBI02_11255	HBI03_15535	PS148-R_00780	PS15001_06710	PS15002_21745	PS16001_09820	PS16002_25650	PS16003_01870	PS16004_03555	PS16005_08375	PS184-R_03515	PS310-R_04295	PS378-R_00780	PS57-R_00780	RL316_26100	RL320_24305	RL97_16970	SA17021_09830	SA17022_05745	SA17023_06055	SA17024_09105	SA17101_10955	SB17032_17110	SB17033_23525	SB17034_06515	SB17035_23990	SB17036_18590	SB17037_16290	SB17038_02095	SB17039_04585	SB17040_08280	SB17042_05825
group_10085	araJ	putative arabinose efflux permease AraJ, MFS family	46	46	1	99	3087				1253	1253	1253	2E151-R_06960	HBI01_00535	HBI05_04095	HBI04_05890	HBI02_09215	HBI03_03275	PS148-R_19710	PS15001_25965	PS15002_09165	PS16001_22740	PS16002_22290	PS16003_26100	PS16004_12625	PS16005_05200	PS184-R_19645	PS310-R_02900	PS378-R_20010	PS57-R_18660	RL316_22815	RL320_16915	RL97_25570	SA17021_06705	SA17022_19620	SA17023_17905	SA17024_10580	SA17101_21150	SB17032_22655	SB17033_16740	SB17034_17920	SB17035_12020	SB17036_25095	SB17037_08700	SB17038_08750	SB17039_15390	SB17040_15595	SB17042_22905
rcsC		two-component system sensor histidine kinase RcsC	46	46	1	99	10332				2849	2849	2849	2E151-R_04690	HBI01_24970	HBI05_21620	HBI04_12535	HBI02_09535	HBI03_01600	PS148-R_02970	PS15001_14780	PS15002_03535	PS16001_03000	PS16002_11485	PS16003_06320	PS16004_02525	PS16005_18105	PS184-R_07480	PS310-R_07720	PS378-R_02970	PS57-R_04760	RL316_15030	RL320_13150	RL97_13650	SA17021_22615	SA17022_02340	SA17023_09535	SA17024_14560	SA17101_04070	SB17032_15845	SB17033_12195	SB17034_18675	SB17035_21630	SB17036_02870	SB17037_06615	SB17038_05840	SB17039_03025	SB17040_02120	SB17042_01865
rutC		pyrimidine utilization protein C	46	46	1	99	716				386	386	386	2E151-R_03290	HBI01_01935	HBI05_14460	HBI04_10765	HBI02_01535	HBI03_21635	PS148-R_05050	PS15001_22595	PS15002_01795	PS16001_18030	PS16002_10270	PS16003_15500	PS16004_19950	PS16005_18790	PS184-R_06015	PS310-R_06320	PS378-R_04440	PS57-R_02660	RL316_24655	RL320_23380	RL97_06475	SA17021_00280	SA17022_08945	SA17023_01825	SA17024_16650	SA17101_02510	SB17032_21935	SB17033_02975	SB17034_19535	SB17035_04840	SB17036_10245	SB17037_03055	SB17038_12775	SB17039_23295	SB17040_19175	SB17042_09265
hybA		hydrogenase 2 operon protein HybA	46	46	1	99	9292				986	986	986	2E151-R_00630	HBI01_17440	HBI05_04445	HBI04_23045	HBI02_16535	HBI03_05585	PS148-R_01410	PS15001_09570	PS15002_21115	PS16001_09185	PS16002_25020	PS16003_01240	PS16004_04650	PS16005_07740	PS184-R_04145	PS310-R_03665	PS378-R_01410	PS57-R_01410	RL316_25470	RL320_24935	RL97_23520	SA17021_10460	SA17022_05115	SA17023_05425	SA17024_08475	SA17101_10370	SB17032_05020	SB17033_24155	SB17034_07145	SB17035_02165	SB17036_08735	SB17037_01560	SB17038_01060	SB17039_00810	SB17040_09555	SB17042_06385
fusA		elongation factor G	46	46	1	99	6853				2114	2114	2114	2E151-R_14385	HBI01_22585	HBI05_17490	HBI04_11070	HBI02_12155	HBI03_19240	PS148-R_13175	PS15001_11690	PS15002_22545	PS16001_13705	PS16002_18990	PS16003_13445	PS16004_14365	PS16005_06550	PS184-R_13950	PS310-R_14420	PS378-R_13635	PS57-R_13545	RL316_19545	RL320_13410	RL97_01000	SA17021_16410	SA17022_16165	SA17023_07705	SA17024_05840	SA17101_14965	SB17032_04025	SB17033_10870	SB17034_16450	SB17035_03470	SB17036_24055	SB17037_25515	SB17038_18780	SB17039_13315	SB17040_25735	SB17042_05030
ubiA		4-hydroxybenzoate octaprenyltransferase	46	46	1	99	2525				872	872	872	2E151-R_21310	HBI01_22340	HBI05_19615	HBI04_06670	HBI02_14485	HBI03_06250	PS148-R_21550	PS15001_02595	PS15002_12520	PS16001_08245	PS16002_02895	PS16003_04700	PS16004_17255	PS16005_12410	PS184-R_21220	PS310-R_21140	PS378-R_21775	PS57-R_21180	RL316_23710	RL320_06555	RL97_22825	SA17021_11870	SA17022_04265	SA17023_00935	SA17024_03350	SA17101_07890	SB17032_09910	SB17033_08805	SB17034_01170	SB17035_11265	SB17036_07885	SB17037_14490	SB17038_09535	SB17039_08055	SB17040_06410	SB17042_17890
metA		homoserine O-succinyltransferase	46	46	1	99	2484				929	929	929	2E151-R_24275	HBI01_22535	HBI05_00970	HBI04_13840	HBI02_05395	HBI03_12250	PS148-R_24170	PS15001_15905	PS15002_12325	PS16001_08050	PS16002_02700	PS16003_04505	PS16004_17065	PS16005_12215	PS184-R_24430	PS310-R_20950	PS378-R_24545	PS57-R_24105	RL316_23905	RL320_06755	RL97_23020	SA17021_12065	SA17022_04070	SA17023_00740	SA17024_03545	SA17101_07700	SB17032_10115	SB17033_09000	SB17034_00975	SB17035_16030	SB17036_07690	SB17037_14295	SB17038_09730	SB17039_08250	SB17040_06605	SB17042_18095
mrcA		peptidoglycan glycosyltransferase/peptidoglycan DD-transpeptidase MrcA	46	46	1	99	6911				2552	2552	2552	2E151-R_14125	HBI01_03665	HBI05_17750	HBI04_11330	HBI02_12415	HBI03_23255	PS148-R_13435	PS15001_03160	PS15002_22805	PS16001_13965	PS16002_18730	PS16003_13185	PS16004_14105	PS16005_06290	PS184-R_13690	PS310-R_14680	PS378-R_13895	PS57-R_13285	RL316_19805	RL320_13670	RL97_00280	SA17021_16150	SA17022_16425	SA17023_07965	SA17024_05580	SA17101_15250	SB17032_03780	SB17033_11130	SB17034_16710	SB17035_03210	SB17036_23795	SB17037_25255	SB17038_18520	SB17039_13575	SB17040_25475	SB17042_04785
narP		nitrate/nitrite response regulator protein NarP	46	46	1	99	10364				647	647	647	2E151-R_04540	HBI01_18120	HBI05_22995	HBI04_17360	HBI02_09380	HBI03_11155	PS148-R_02820	PS15001_14930	PS15002_03685	PS16001_02850	PS16002_15295	PS16003_06170	PS16004_02675	PS16005_14805	PS184-R_07630	PS310-R_07570	PS378-R_02820	PS57-R_04910	RL316_15180	RL320_13000	RL97_05610	SA17021_13145	SA17022_02190	SA17023_09380	SA17024_20240	SA17101_03915	SB17032_24090	SB17033_18675	SB17034_18525	SB17035_21780	SB17036_03020	SB17037_06765	SB17038_05690	SB17039_03175	SB17040_02270	SB17042_07990
nuoL		NADH-quinone oxidoreductase subunit L	46	46	1	99	10259				1841	1841	1841	2E151-R_04980	HBI01_10760	HBI05_05270	HBI04_18625	HBI02_25650	HBI03_24670	PS148-R_03260	PS15001_14490	PS15002_03245	PS16001_03290	PS16002_11775	PS16003_06610	PS16004_01835	PS16005_14090	PS184-R_07190	PS310-R_08010	PS378-R_03260	PS57-R_04470	RL316_14740	RL320_08550	RL97_20940	SA17021_22905	SA17022_02630	SA17023_09825	SA17024_17805	SA17101_04300	SB17032_13985	SB17033_06895	SB17034_12815	SB17035_21340	SB17036_15370	SB17037_06325	SB17038_06130	SB17039_02735	SB17040_01830	SB17042_01565
trmB		tRNA (guanosine(46)-N7)-methyltransferase TrmB	46	46	1	99	7520				719	719	719	2E151-R_24550	HBI01_07835	HBI05_24640	HBI04_03360	HBI02_20910	HBI03_02970	PS148-R_24290	PS15001_00725	PS15002_14665	PS16001_23660	PS16002_04195	PS16003_08805	PS16004_07655	PS16005_09225	PS184-R_24790	PS310-R_24520	PS378-R_24665	PS57-R_24465	RL316_19475	RL320_20260	RL97_24660	SA17021_12215	SA17022_12070	SA17023_04260	SA17024_23920	SA17101_15895	SB17032_10260	SB17033_14680	SB17034_16335	SB17035_18305	SB17036_05025	SB17037_13110	SB17038_09805	SB17039_04495	SB17040_10100	SB17042_23115
rseP		sigma E protease regulator RseP	46	46	1	99	8761				1352	1352	1352	2E151-R_11315	HBI01_24165	HBI05_01730	HBI04_17825	HBI02_03570	HBI03_17180	PS148-R_08305	PS15001_07410	PS15002_25855	PS16001_12350	PS16002_22990	PS16003_11980	PS16004_23030	PS16005_24890	PS184-R_10885	PS310-R_11185	PS378-R_09310	PS57-R_07095	RL316_06825	RL320_04890	RL97_04970	SA17021_21955	SA17022_26400	SA17023_11680	SA17024_21035	SA17101_13425	SB17032_27115	SB17033_00130	SB17034_00780	SB17035_14485	SB17036_10935	SB17037_10800	SB17038_17695	SB17039_20065	SB17040_23735	SB17042_02060
oppF		murein tripeptide/oligopeptide ABC transporter ATP-binding protein OppF	46	46	1	99	6108				1004	1004	1004	2E151-R_16775	HBI01_08155	HBI05_25360	HBI04_25255	HBI02_02815	HBI03_12305	PS148-R_16495	PS15001_04540	PS15002_18750	PS16001_25470	PS16002_08845	PS16003_17095	PS16004_12370	PS16005_04795	PS184-R_16340	PS310-R_19020	PS378-R_16515	PS57-R_15935	RL316_13365	RL320_25310	RL97_21510	SA17021_25025	SA17022_18200	SA17023_02955	SA17024_20360	SA17101_19445	SB17032_12100	SB17033_07020	SB17034_13135	SB17035_16720	SB17036_09910	SB17037_18760	SB17038_00680	SB17039_25005	SB17040_03725	SB17042_24280
nlpD		murein hydrolase activator NlpD	46	46	1	99	8096				1139	1139	1139	2E151-R_16320	HBI01_08910	HBI05_15595	HBI04_19010	HBI02_17765	HBI03_18210	PS148-R_16075	PS15001_06000	PS15002_00435	PS16001_01610	PS16002_17560	PS16003_17905	PS16004_11635	PS16005_07405	PS184-R_15920	PS310-R_18095	PS378-R_15585	PS57-R_15515	RL316_18290	RL320_21450	RL97_14730	SA17021_19680	SA17022_08240	SA17023_15900	SA17024_25100	SA17101_06475	SB17032_01770	SB17033_13495	SB17034_15150	SB17035_19485	SB17036_06210	SB17037_19625	SB17038_10970	SB17039_06525	SB17040_11280	SB17042_17105
dacC		serine-type D-Ala-D-Ala carboxypeptidase	46	46	1	99	9995				1202	1202	1202	2E151-R_02505	HBI01_13090	HBI05_07265	HBI04_26125	HBI02_16835	HBI03_11485	PS148-R_04265	PS15001_23380	PS15002_02580	PS16001_05655	PS16002_11055	PS16003_14715	PS16004_14975	PS16005_19565	PS184-R_05230	PS310-R_05535	PS378-R_05225	PS57-R_03445	RL316_17030	RL320_15055	RL97_09135	SA17021_01065	SA17022_09730	SA17023_00340	SA17024_00780	SA17101_01630	SB17032_23120	SB17033_04635	SB17034_20320	SB17035_06560	SB17036_04365	SB17037_03840	SB17038_02600	SB17039_22510	SB17040_19960	SB17042_07870
ugpE		sn-glycerol-3-phosphate ABC transporter permease UgpE	46	46	1	99	6971				845	845	845	2E151-R_13860	HBI01_03930	HBI05_18430	HBI04_13195	HBI02_07040	HBI03_14680	PS148-R_13700	PS15001_02895	PS15002_23070	PS16001_14230	PS16002_18465	PS16003_12920	PS16004_18935	PS16005_06025	PS184-R_13425	PS310-R_14945	PS378-R_14160	PS57-R_13020	RL316_20070	RL320_13935	RL97_00545	SA17021_15885	SA17022_16690	SA17023_08230	SA17024_05315	SA17101_26565	SB17032_03495	SB17033_11395	SB17034_25815	SB17035_02945	SB17036_23530	SB17037_24990	SB17038_18255	SB17039_13840	SB17040_25210	SB17042_04500
gorA		glutathione-disulfide reductase	46	46	1	99	7050				1352	1352	1352	2E151-R_13595	HBI01_04195	HBI05_18070	HBI04_07035	HBI02_04025	HBI03_15900	PS148-R_13965	PS15001_21925	PS15002_23335	PS16001_14495	PS16002_18200	PS16003_12655	PS16004_18670	PS16005_05760	PS184-R_13160	PS310-R_15210	PS378-R_14425	PS57-R_12755	RL316_20335	RL320_14200	RL97_00810	SA17021_15620	SA17022_16955	SA17023_08495	SA17024_05050	SA17101_26320	SB17032_19405	SB17033_11660	SB17034_25550	SB17035_02680	SB17036_23265	SB17037_24725	SB17038_17990	SB17039_12215	SB17040_04250	SB17042_04125
dsbC		bifunctional protein-disulfide isomerase/oxidoreductase DsbC	46	46	1	99	7436				710	710	710	2E151-R_15750	HBI01_15925	HBI05_10745	HBI04_21585	HBI02_23135	HBI03_22515	PS148-R_15470	PS15001_00370	PS15002_14310	PS16001_24015	PS16002_03840	PS16003_08445	PS16004_07300	PS16005_09580	PS184-R_15110	PS310-R_16865	PS378-R_15020	PS57-R_14705	RL316_19120	RL320_20615	RL97_05410	SA17021_20510	SA17022_12425	SA17023_03905	SA17024_24275	SA17101_07325	SB17032_00875	SB17033_14325	SB17034_15980	SB17035_18660	SB17036_05380	SB17037_12755	SB17038_10160	SB17039_05695	SB17040_10455	SB17042_12340
aqpZ		aquaporin Z	46	46	1	99	10041				695	695	695	2E151-R_02690	HBI01_13275	HBI05_07055	HBI04_05185	HBI02_10440	HBI03_08030	PS148-R_04450	PS15001_23195	PS15002_02395	PS16001_05470	PS16002_10870	PS16003_14900	PS16004_14790	PS16005_01940	PS184-R_05415	PS310-R_05720	PS378-R_05040	PS57-R_03260	RL316_16845	RL320_14870	RL97_09320	SA17021_00880	SA17022_09545	SA17023_00525	SA17024_16050	SA17101_01820	SB17032_23345	SB17033_04450	SB17034_20135	SB17035_17485	SB17036_10845	SB17037_03655	SB17038_13375	SB17039_22695	SB17040_19775	SB17042_18640
trkH		Trk system potassium transporter TrkH	46	46	1	99	4343				1451	1451	1451	2E151-R_18035	HBI01_22930	HBI05_20510	HBI04_00850	HBI02_20065	HBI03_13725	PS148-R_18400	PS15001_24280	PS15002_23635	PS16001_24680	PS16002_24190	PS16003_26555	PS16004_22000	PS16005_26030	PS184-R_18245	PS310-R_20360	PS378-R_19175	PS57-R_17845	RL316_08495	RL320_09000	RL97_11485	SA17021_26430	SA17022_13700	SA17023_22820	SA17024_13285	SA17101_09780	SB17032_00375	SB17033_20160	SB17034_22445	SB17035_25655	SB17036_16570	SB17037_22960	SB17038_15255	SB17039_14450	SB17040_12120	SB17042_17215
cyoE		heme o synthase	46	46	1	99	1976				890	890	890	2E151-R_12080	HBI01_14160	HBI05_12575	HBI04_08075	HBI02_26020	HBI03_02055	PS148-R_11800	PS15001_01420	PS15002_04455	PS16001_06630	PS16002_02045	PS16003_10435	PS16004_00595	PS16005_17000	PS184-R_11650	PS310-R_13050	PS378-R_11960	PS57-R_10195	RL316_00780	RL320_11090	RL97_14020	SA17021_04825	SA17022_23330	SA17023_10765	SA17024_07505	SA17101_14260	SB17032_13010	SB17033_09730	SB17034_08955	SB17035_08455	SB17036_06620	SB17037_23945	SB17038_25575	SB17039_11410	SB17040_00065	SB17042_14800
rbsK		ribokinase	46	46	1	99	4662				929	929	929	2E151-R_08625	HBI01_10015	HBI05_22305	HBI04_23365	HBI02_17030	HBI03_10370	PS148-R_07085	PS15001_11065	PS15002_15165	PS16001_00020	PS16002_01685	PS16003_23965	PS16004_09405	PS16005_01895	PS184-R_08270	PS310-R_08575	PS378-R_07770	PS57-R_06950	RL316_01435	RL320_07260	RL97_08075	SA17021_14065	SA17022_01295	SA17023_05160	SA17024_03580	SA17101_00835	SB17032_12660	SB17033_02520	SB17034_13280	SB17035_10230	SB17036_01590	SB17037_22030	SB17038_11600	SB17039_01090	SB17040_05805	SB17042_15645
yajQ		nucleotide binding protein YajQ	46	46	1	99	1974				491	491	491	2E151-R_12070	HBI01_14150	HBI05_12565	HBI04_08065	HBI02_26010	HBI03_02045	PS148-R_11790	PS15001_01410	PS15002_04465	PS16001_06620	PS16002_02055	PS16003_10425	PS16004_00605	PS16005_16990	PS184-R_11640	PS310-R_13040	PS378-R_11970	PS57-R_10185	RL316_00790	RL320_11100	RL97_14030	SA17021_04835	SA17022_23320	SA17023_10775	SA17024_07495	SA17101_14235	SB17032_13020	SB17033_09740	SB17034_08965	SB17035_08465	SB17036_06630	SB17037_23955	SB17038_25585	SB17039_11420	SB17040_00055	SB17042_14810
miaB		tRNA (N6-isopentenyl adenosine(37)-C2)-methylthiotransferase MiaB	46	46	1	99	1568				1424	1424	1424	2E151-R_18015	HBI01_10645	HBI05_02015	HBI04_14205	HBI02_14105	HBI03_16285	PS148-R_17075	PS15001_08640	PS15002_10195	PS16001_17160	PS16002_17315	PS16003_09050	PS16004_15320	PS16005_17785	PS184-R_16920	PS310-R_19785	PS378-R_17280	PS57-R_17175	RL316_07910	RL320_22200	RL97_09985	SA17021_02055	SA17022_07080	SA17023_13065	SA17024_01660	SA17101_23560	SB17032_17635	SB17033_05515	SB17034_21200	SB17035_07440	SB17036_02330	SB17037_12020	SB17038_03480	SB17039_10490	SB17040_20830	SB17042_06950
asnB		asparagine synthase B	46	46	1	99	1571				1664	1664	1664	2E151-R_19730	HBI01_10540	HBI05_01975	HBI04_14160	HBI02_14055	HBI03_16235	PS148-R_20305	PS15001_08590	PS15002_10145	PS16001_17110	PS16002_17360	PS16003_09100	PS16004_15270	PS16005_17835	PS184-R_20165	PS310-R_21390	PS378-R_20195	PS57-R_19375	RL316_07960	RL320_22250	RL97_09935	SA17021_02005	SA17022_07030	SA17023_13015	SA17024_01610	SA17101_23605	SB17032_17595	SB17033_05465	SB17034_21150	SB17035_07390	SB17036_02380	SB17037_11970	SB17038_03430	SB17039_10440	SB17040_20790	SB17042_06995
nuoC		NADH-quinone oxidoreductase subunit C/D	46	46	1	99	10251				1802	1802	1802	2E151-R_05020	HBI01_10800	HBI05_05310	HBI04_18665	HBI02_25690	HBI03_24710	PS148-R_03300	PS15001_14450	PS15002_03205	PS16001_03330	PS16002_11815	PS16003_06650	PS16004_01795	PS16005_14130	PS184-R_07150	PS310-R_08050	PS378-R_03300	PS57-R_04430	RL316_14700	RL320_08590	RL97_20900	SA17021_22945	SA17022_02670	SA17023_09865	SA17024_17845	SA17101_04340	SB17032_14025	SB17033_06855	SB17034_12775	SB17035_21300	SB17036_15330	SB17037_06285	SB17038_06170	SB17039_02695	SB17040_01790	SB17042_01525
ydfG		bifunctional NADP-dependent 3-hydroxy acid dehydrogenase/3-hydroxypropionate dehydrogenase YdfG	46	46	1	99	3330				746	746	746	2E151-R_07040	HBI01_00450	HBI05_03705	HBI04_05995	HBI02_17290	HBI03_18785	PS148-R_19790	PS15001_26045	PS15002_09250	PS16001_22825	PS16002_22375	PS16003_26185	PS16004_12540	PS16005_05115	PS184-R_19560	PS310-R_02980	PS378-R_19925	PS57-R_18575	RL316_22900	RL320_16830	RL97_25485	SA17021_06790	SA17022_19535	SA17023_17820	SA17024_10495	SA17101_25840	SB17032_25210	SB17033_16655	SB17034_18005	SB17035_11935	SB17036_25010	SB17037_08785	SB17038_08835	SB17039_15305	SB17040_15680	SB17042_26175
eutC		ethanolamine ammonia-lyase subunit beta	46	46	1	99	432				887	887	887	2E151-R_24105	HBI01_25555	HBI05_01300	HBI04_16815	HBI02_08355	HBI03_23700	PS148-R_23625	PS15001_13760	PS15002_08440	PS16001_04020	PS16002_06680	PS16003_07345	PS16004_01235	PS16005_10235	PS184-R_24245	PS310-R_11485	PS378-R_10685	PS57-R_23580	RL316_10135	RL320_26510	RL97_13260	SA17021_04060	SA17022_03360	SA17023_10555	SA17024_18535	SA17101_05115	SB17032_14990	SB17033_21535	SB17034_12080	SB17035_20605	SB17036_14640	SB17037_05590	SB17038_06860	SB17039_09420	SB17040_01100	SB17042_00795
rhtA		threonine/homoserine exporter RhtA	46	46	1	99	9968				887	887	887	2E151-R_02375	HBI01_12960	HBI05_07425	HBI04_26255	HBI02_23905	HBI03_03390	PS148-R_04135	PS15001_23510	PS15002_02710	PS16001_05785	PS16002_11185	PS16003_14585	PS16004_15105	PS16005_19435	PS184-R_05100	PS310-R_05405	PS378-R_05355	PS57-R_03575	RL316_17160	RL320_15185	RL97_09005	SA17021_01195	SA17022_09860	SA17023_00210	SA17024_00910	SA17101_20680	SB17032_06575	SB17033_04765	SB17034_20450	SB17035_06690	SB17036_04235	SB17037_03970	SB17038_02730	SB17039_22380	SB17040_20090	SB17042_07735
kefB		glutathione-regulated potassium-efflux system protein KefB	46	46	1	99	6864				1805	1805	1805	2E151-R_14330	HBI01_22640	HBI05_17545	HBI04_11125	HBI02_12210	HBI03_19295	PS148-R_13230	PS15001_11635	PS15002_22600	PS16001_13760	PS16002_18935	PS16003_13390	PS16004_14310	PS16005_06495	PS184-R_13895	PS310-R_14475	PS378-R_13690	PS57-R_13490	RL316_19600	RL320_13465	RL97_01055	SA17021_16355	SA17022_16220	SA17023_07760	SA17024_05785	SA17101_15020	SB17032_03970	SB17033_10925	SB17034_16505	SB17035_03415	SB17036_24000	SB17037_25460	SB17038_18725	SB17039_13370	SB17040_25680	SB17042_04975
garD		galactarate dehydratase	46	46	1	99	9135				1571	1571	1571	2E151-R_01315	HBI01_06935	HBI05_13215	HBI04_01605	HBI02_24220	HBI03_10120	PS148-R_00725	PS15001_06765	PS15002_21800	PS16001_09875	PS16002_25705	PS16003_01925	PS16004_03610	PS16005_08430	PS184-R_03460	PS310-R_04350	PS378-R_00725	PS57-R_00725	RL316_26155	RL320_24250	RL97_17025	SA17021_09775	SA17022_05800	SA17023_06110	SA17024_09160	SA17101_11020	SB17032_17045	SB17033_23470	SB17034_06460	SB17035_24045	SB17036_18645	SB17037_16345	SB17038_02040	SB17039_04640	SB17040_08225	SB17042_05760
relA		GTP diphosphokinase	46	46	1	99	7736				2234	2234	2234	2E151-R_16520	HBI01_09110	HBI05_20790	HBI04_20730	HBI02_26960	HBI03_12580	PS148-R_15875	PS15001_06200	PS15002_00235	PS16001_01810	PS16002_17760	PS16003_18105	PS16004_11435	PS16005_07205	PS184-R_15720	PS310-R_18295	PS378-R_15785	PS57-R_15315	RL316_18490	RL320_21250	RL97_14930	SA17021_19880	SA17022_08040	SA17023_16100	SA17024_24900	SA17101_06700	SB17032_01540	SB17033_13695	SB17034_15350	SB17035_19285	SB17036_06010	SB17037_19425	SB17038_10770	SB17039_06325	SB17040_11080	SB17042_13005
hemN		oxygen-independent coproporphyrinogen III oxidase	46	46	1	99	1012				1373	1373	1373	2E151-R_21005	HBI01_10385	HBI05_01030	HBI04_25800	HBI02_19485	HBI03_04110	PS148-R_21245	PS15001_16515	PS15002_01100	PS16001_11515	PS16002_05725	PS16003_00910	PS16004_06035	PS16005_03585	PS184-R_21105	PS310-R_17700	PS378-R_21470	PS57-R_21065	RL316_03505	RL320_15585	RL97_01310	SA17021_17210	SA17022_11935	SA17023_07130	SA17024_09975	SA17101_09245	SB17032_09375	SB17033_18175	SB17034_24505	SB17035_10030	SB17036_06960	SB17037_09030	SB17038_04740	SB17039_00080	SB17040_08505	SB17042_20385
bepA		beta-barrel assembly-enhancing protease	46	46	1	99	380				1463	1463	1463	2E151-R_14555	HBI01_25365	HBI05_11860	HBI04_08480	HBI02_08105	HBI03_21110	PS148-R_14850	PS15001_13570	PS15002_08630	PS16001_04210	PS16002_06970	PS16003_07535	PS16004_01425	PS16005_10045	PS184-R_14695	PS310-R_11670	PS378-R_10870	PS57-R_13715	RL316_09945	RL320_26320	RL97_11245	SA17021_03870	SA17022_03550	SA17023_22040	SA17024_17445	SA17101_05385	SB17032_15240	SB17033_08065	SB17034_11890	SB17035_20415	SB17036_14450	SB17037_05400	SB17038_07050	SB17039_08875	SB17040_00910	SB17042_00545
srlR		glucitol operon DNA-binding transcriptional repressor SrlR	46	46	1	99	8050				773	773	773	2E151-R_16065	HBI01_08710	HBI05_15415	HBI04_21090	HBI02_17585	HBI03_10705	PS148-R_16330	PS15001_10345	PS15002_17970	PS16001_17300	PS16002_15135	PS16003_24515	PS16004_18500	PS16005_11715	PS184-R_16170	PS310-R_17845	PS378-R_15335	PS57-R_15770	RL316_18035	RL320_05545	RL97_11625	SA17021_10885	SA17022_15010	SA17023_14640	SA17024_06015	SA17101_06265	SB17032_01945	SB17033_13240	SB17034_14085	SB17035_22830	SB17036_13135	SB17037_14145	SB17038_14675	SB17039_20745	SB17040_16475	SB17042_16930
dppA		dipeptide ABC transporter substrate-binding protein DppA	46	46	1	99	7115				1607	1607	1607	2E151-R_07360	HBI01_20785	HBI05_05075	HBI04_06235	HBI02_20495	HBI03_19500	PS148-R_05820	PS15001_12750	PS15002_11450	PS16001_01285	PS16002_00420	PS16003_04340	PS16004_05610	PS16005_00150	PS184-R_09535	PS310-R_09840	PS378-R_09035	PS57-R_05685	RL316_02575	RL320_09920	RL97_23825	SA17021_15325	SA17022_17245	SA17023_14920	SA17024_04845	SA17101_26025	SB17032_19065	SB17033_01255	SB17034_02670	SB17035_05610	SB17036_00325	SB17037_20770	SB17038_22020	SB17039_02355	SB17040_04540	SB17042_03785
tolQ		Tol-Pal system protein TolQ	46	46	1	99	9888				692	692	692	2E151-R_20045	HBI01_04825	HBI05_19445	HBI04_26645	HBI02_21050	HBI03_03640	PS148-R_19990	PS15001_08275	PS15002_09830	PS16001_16795	PS16002_09325	PS16003_09415	PS16004_13810	PS16005_10995	PS184-R_19850	PS310-R_21705	PS378-R_20510	PS57-R_19690	RL316_08275	RL320_22565	RL97_08620	SA17021_01690	SA17022_06720	SA17023_12700	SA17024_01295	SA17101_20280	SB17032_06170	SB17033_05150	SB17034_20835	SB17035_07075	SB17036_03850	SB17037_11655	SB17038_03115	SB17039_21995	SB17040_20475	SB17042_07335
lrhA		transcriptional regulator LrhA	46	46	1	99	10247				938	938	938	2E151-R_05040	HBI01_10820	HBI05_05330	HBI04_11940	HBI02_25710	HBI03_24730	PS148-R_03320	PS15001_14430	PS15002_03185	PS16001_03350	PS16002_11835	PS16003_06670	PS16004_01775	PS16005_14150	PS184-R_07130	PS310-R_08070	PS378-R_03320	PS57-R_04410	RL316_14680	RL320_08610	RL97_20880	SA17021_13250	SA17022_02690	SA17023_09885	SA17024_17865	SA17101_04360	SB17032_14045	SB17033_06835	SB17034_12755	SB17035_21280	SB17036_15310	SB17037_06265	SB17038_06190	SB17039_02675	SB17040_01770	SB17042_01505
gpmB		putative phosphoglycerate mutase GpmB	46	46	1	99	8660				647	647	647	2E151-R_10285	HBI01_17005	HBI05_19025	HBI04_22655	HBI02_15075	HBI03_09150	PS148-R_07270	PS15001_20600	PS15002_24825	PS16001_13385	PS16002_24015	PS16003_10945	PS16004_24065	PS16005_23855	PS184-R_09850	PS310-R_10155	PS378-R_10345	PS57-R_08130	RL316_05795	RL320_03855	RL97_04430	SA17021_20910	SA17022_25365	SA17023_23815	SA17024_22070	SA17101_12455	SB17032_28120	SB17033_04380	SB17034_03625	SB17035_13450	SB17036_11975	SB17037_00520	SB17038_16655	SB17039_19030	SB17040_22700	SB17042_03060
sapA		peptide ABC transporter substrate-binding protein SapA	46	46	1	99	6193				1643	1643	1643	2E151-R_17050	HBI01_15100	HBI05_16980	HBI04_09200	HBI02_02555	HBI03_19970	PS148-R_16770	PS15001_04265	PS15002_18475	PS16001_25195	PS16002_16355	PS16003_23555	PS16004_02150	PS16005_05070	PS184-R_16615	PS310-R_18745	PS378-R_16240	PS57-R_16210	RL316_13090	RL320_19000	RL97_21235	SA17021_25300	SA17022_17925	SA17023_25000	SA17024_00300	SA17101_19190	SB17032_11820	SB17033_22245	SB17034_23410	SB17035_17000	SB17036_18120	SB17037_18485	SB17038_24480	SB17039_24730	SB17040_03450	SB17042_12030
sufS		cysteine desulfurase SufS	46	46	1	99	2993				1220	1220	1220	2E151-R_06515	HBI01_00250	HBI05_23305	HBI04_19610	HBI02_22580	HBI03_18180	PS148-R_10875	PS15001_25520	PS15002_07815	PS16001_22295	PS16002_21840	PS16003_25655	PS16004_10145	PS16005_13025	PS184-R_00270	PS310-R_02455	PS378-R_17560	PS57-R_08565	RL316_22370	RL320_17360	RL97_26015	SA17021_07355	SA17022_20070	SA17023_18350	SA17024_11025	SA17101_21600	SB17032_20705	SB17033_17185	SB17034_05795	SB17035_12465	SB17036_19415	SB17037_08255	SB17038_08305	SB17039_15835	SB17040_15150	SB17042_11065
pal		peptidoglycan-associated lipoprotein Pal	46	46	1	99	9892				521	521	521	2E151-R_20065	HBI01_04845	HBI05_19465	HBI04_26625	HBI02_21030	HBI03_03660	PS148-R_19970	PS15001_08255	PS15002_09810	PS16001_16775	PS16002_09305	PS16003_09435	PS16004_13790	PS16005_10975	PS184-R_19830	PS310-R_21725	PS378-R_20530	PS57-R_19710	RL316_08295	RL320_22585	RL97_08640	SA17021_01670	SA17022_06740	SA17023_12680	SA17024_01275	SA17101_20300	SB17032_06190	SB17033_05130	SB17034_20815	SB17035_07055	SB17036_03870	SB17037_11635	SB17038_03095	SB17039_22015	SB17040_20455	SB17042_07355
yigI		thioesterase family protein	46	46	1	99	4447				467	467	467	2E151-R_18290	HBI01_20910	HBI05_20370	HBI04_09405	HBI02_19925	HBI03_13820	PS148-R_18655	PS15001_24030	PS15002_16980	PS16001_15735	PS16002_24450	PS16003_02725	PS16004_22260	PS16005_00755	PS184-R_18500	PS310-R_20105	PS378-R_18925	PS57-R_18095	RL316_11110	RL320_01130	RL97_00070	SA17021_23585	SA17022_13445	SA17023_22555	SA17024_13540	SA17101_09640	SB17032_00515	SB17033_25185	SB17034_22190	SB17035_25910	SB17036_16825	SB17037_23215	SB17038_15510	SB17039_14705	SB17040_12370	SB17042_17355
rbsA		ribose ABC transporter ATP-binding protein RbsA	46	46	1	99	4665				1505	1505	1505	2E151-R_08610	HBI01_10000	HBI05_22290	HBI04_23350	HBI02_17015	HBI03_10355	PS148-R_07070	PS15001_11080	PS15002_15180	PS16001_00035	PS16002_01670	PS16003_23980	PS16004_09390	PS16005_01880	PS184-R_08285	PS310-R_08590	PS378-R_07785	PS57-R_06935	RL316_01450	RL320_07275	RL97_08060	SA17021_14080	SA17022_01280	SA17023_05145	SA17024_03595	SA17101_00850	SB17032_12675	SB17033_02505	SB17034_13295	SB17035_10245	SB17036_01575	SB17037_22015	SB17038_11585	SB17039_01105	SB17040_05790	SB17042_15660
gntT		gluconate transporter	46	46	1	99	6931				1316	1316	1316	2E151-R_14030	HBI01_03760	HBI05_17850	HBI04_11430	HBI02_12515	HBI03_23355	PS148-R_13530	PS15001_03065	PS15002_22900	PS16001_14060	PS16002_18635	PS16003_13090	PS16004_14010	PS16005_06195	PS184-R_13595	PS310-R_14775	PS378-R_13990	PS57-R_13190	RL316_19900	RL320_13765	RL97_00375	SA17021_16055	SA17022_16520	SA17023_08060	SA17024_05485	SA17101_26755	SB17032_03685	SB17033_11225	SB17034_25985	SB17035_03115	SB17036_23700	SB17037_25160	SB17038_18425	SB17039_13670	SB17040_25380	SB17042_04690
accD		acetyl-CoA carboxylase, carboxyltransferase subunit beta	46	46	1	99	10219				914	914	914	2E151-R_05175	HBI01_10955	HBI05_05465	HBI04_14715	HBI02_25845	HBI03_07265	PS148-R_03455	PS15001_14295	PS15002_03050	PS16001_03485	PS16002_11970	PS16003_06805	PS16004_01640	PS16005_14285	PS184-R_06995	PS310-R_08205	PS378-R_03455	PS57-R_04275	RL316_14545	RL320_08745	RL97_22125	SA17021_13385	SA17022_02825	SA17023_10020	SA17024_18000	SA17101_04495	SB17032_14195	SB17033_06700	SB17034_12620	SB17035_21145	SB17036_15175	SB17037_06130	SB17038_06325	SB17039_02540	SB17040_01635	SB17042_01355
pcm		protein-L-isoaspartate O-methyltransferase	46	46	1	99	8097				626	626	626	2E151-R_16325	HBI01_08915	HBI05_15600	HBI04_19015	HBI02_17770	HBI03_18215	PS148-R_16070	PS15001_06005	PS15002_00430	PS16001_01615	PS16002_17565	PS16003_17910	PS16004_11630	PS16005_07400	PS184-R_15915	PS310-R_18100	PS378-R_15590	PS57-R_15510	RL316_18295	RL320_21445	RL97_14735	SA17021_19685	SA17022_08235	SA17023_15905	SA17024_25095	SA17101_06480	SB17032_01765	SB17033_13500	SB17034_15155	SB17035_19480	SB17036_06205	SB17037_19620	SB17038_10965	SB17039_06520	SB17040_11275	SB17042_17110
garP		galactarate/glucarate/glycerate transporter GarP	46	46	1	99	9136				1334	1334	1334	2E151-R_01310	HBI01_06930	HBI05_13210	HBI04_11830	HBI02_24215	HBI03_08965	PS148-R_00730	PS15001_06760	PS15002_21795	PS16001_09870	PS16002_25700	PS16003_01920	PS16004_03605	PS16005_08425	PS184-R_03465	PS310-R_04345	PS378-R_00730	PS57-R_00730	RL316_26150	RL320_24255	RL97_17020	SA17021_09780	SA17022_05795	SA17023_06105	SA17024_09155	SA17101_11015	SB17032_17050	SB17033_23475	SB17034_06465	SB17035_24040	SB17036_18640	SB17037_16340	SB17038_02045	SB17039_04635	SB17040_08230	SB17042_05765
ghxQ		guanine/hypoxanthine transporter GhxQ	46	46	1	99	7426				1367	1367	1367	2E151-R_15705	HBI01_15875	HBI05_10795	HBI04_21630	HBI02_23180	HBI03_22565	PS148-R_15425	PS15001_00320	PS15002_14260	PS16001_24060	PS16002_03795	PS16003_08400	PS16004_07255	PS16005_09630	PS184-R_15155	PS310-R_16820	PS378-R_14975	PS57-R_14750	RL316_19070	RL320_20665	RL97_05360	SA17021_20460	SA17022_12475	SA17023_03855	SA17024_24320	SA17101_07275	SB17032_00925	SB17033_14275	SB17034_15930	SB17035_18710	SB17036_05430	SB17037_12705	SB17038_10210	SB17039_05745	SB17040_10500	SB17042_12385
frmA		S-(hydroxymethyl)glutathione dehydrogenase	46	46	1	99	1896				1109	1109	1109	2E151-R_11770	HBI01_24455	HBI05_09315	HBI04_02715	HBI02_18445	HBI03_06840	PS148-R_11490	PS15001_01110	PS15002_04765	PS16001_06320	PS16002_02355	PS16003_10125	PS16004_13095	PS16005_16690	PS184-R_11340	PS310-R_12740	PS378-R_12270	PS57-R_09885	RL316_01090	RL320_11400	RL97_02210	SA17021_05135	SA17022_23020	SA17023_11515	SA17024_12950	SA17101_13915	SB17032_02660	SB17033_10040	SB17034_09265	SB17035_01205	SB17036_17170	SB17037_24255	SB17038_25885	SB17039_11720	SB17040_17680	SB17042_16250
gltX		glutamate--tRNA ligase	46	46	1	99	465				1415	1415	1415	2E151-R_05525	HBI01_05845	HBI05_08640	HBI04_16625	HBI02_08540	HBI03_23510	PS148-R_03805	PS15001_13945	PS15002_08255	PS16001_03835	PS16002_06495	PS16003_07160	PS16004_01050	PS16005_10420	PS184-R_06645	PS310-R_08555	PS378-R_03805	PS57-R_03925	RL316_10320	RL320_26695	RL97_13075	SA17021_04245	SA17022_03175	SA17023_10370	SA17024_18350	SA17101_04915	SB17032_14570	SB17033_21720	SB17034_12265	SB17035_20790	SB17036_14825	SB17037_05775	SB17038_06675	SB17039_09605	SB17040_01285	SB17042_00980
usg		aspartate-semialdehyde dehydrogenase	46	46	1	99	10216				1013	1013	1013	2E151-R_05190	HBI01_10970	HBI05_05480	HBI04_14730	HBI02_25860	HBI03_07280	PS148-R_03470	PS15001_14280	PS15002_03035	PS16001_03500	PS16002_11985	PS16003_06820	PS16004_01625	PS16005_14300	PS184-R_06980	PS310-R_08220	PS378-R_03470	PS57-R_04260	RL316_14530	RL320_08760	RL97_22140	SA17021_13400	SA17022_02840	SA17023_10035	SA17024_18015	SA17101_04510	SB17032_14210	SB17033_06685	SB17034_12605	SB17035_21130	SB17036_15160	SB17037_06115	SB17038_06340	SB17039_02525	SB17040_01620	SB17042_01340
yohD		Inner membrane protein YohD	46	46	1	99	22				578	578	578	2E151-R_04245	HBI01_18415	HBI05_09825	HBI04_17070	HBI02_06100	HBI03_06145	PS148-R_02525	PS15001_15225	PS15002_03980	PS16001_02555	PS16002_15595	PS16003_05875	PS16004_02970	PS16005_14510	PS184-R_07925	PS310-R_07275	PS378-R_02525	PS57-R_05205	RL316_15475	RL320_12625	RL97_05905	SA17021_12850	SA17022_01895	SA17023_09085	SA17024_19945	SA17101_03635	SB17032_24375	SB17033_18970	SB17034_14470	SB17035_22075	SB17036_03315	SB17037_07060	SB17038_05395	SB17039_03470	SB17040_02565	SB17042_08280
coaE		dephospho-CoA kinase	46	46	1	99	8870				620	620	620	2E151-R_10895	HBI01_16390	HBI05_11120	HBI04_20135	HBI02_07645	HBI03_14235	PS148-R_07885	PS15001_12410	PS15002_25435	PS16001_12770	PS16002_23400	PS16003_11560	PS16004_23450	PS16005_24470	PS184-R_10465	PS310-R_10765	PS378-R_09730	PS57-R_07515	RL316_06405	RL320_04470	RL97_18720	SA17021_21525	SA17022_25980	SA17023_23200	SA17024_21455	SA17101_13040	SB17032_27510	SB17033_00550	SB17034_00360	SB17035_14065	SB17036_11355	SB17037_01135	SB17038_17275	SB17039_19645	SB17040_23315	SB17042_02455
cysZ		sulfate transporter CysZ	46	46	1	99	458				761	761	761	2E151-R_23985	HBI01_25675	HBI05_01170	HBI04_16695	HBI02_08485	HBI03_23580	PS148-R_23745	PS15001_13880	PS15002_08320	PS16001_03900	PS16002_06560	PS16003_07225	PS16004_01115	PS16005_10355	PS184-R_24365	PS310-R_11365	PS378-R_10565	PS57-R_23460	RL316_10255	RL320_26630	RL97_13140	SA17021_04180	SA17022_03240	SA17023_10435	SA17024_18415	SA17101_04985	SB17032_14860	SB17033_21655	SB17034_12200	SB17035_20725	SB17036_14760	SB17037_05710	SB17038_06740	SB17039_09540	SB17040_01220	SB17042_00925
purU		formyltetrahydrofolate deformylase	46	46	1	99	6092				842	842	842	2E151-R_16685	HBI01_08245	HBI05_25280	HBI04_25340	HBI02_17065	HBI03_04535	PS148-R_16405	PS15001_04630	PS15002_18840	PS16001_25560	PS16002_08755	PS16003_17005	PS16004_09555	PS16005_04705	PS184-R_16250	PS310-R_19110	PS378-R_16605	PS57-R_15845	RL316_13455	RL320_25400	RL97_21600	SA17021_24935	SA17022_18290	SA17023_02865	SA17024_20450	SA17101_19525	SB17032_12180	SB17033_07110	SB17034_10840	SB17035_16630	SB17036_09820	SB17037_18850	SB17038_00590	SB17039_25095	SB17040_03815	SB17042_24200
speB		agmatinase	46	46	1	99	7496				920	920	920	2E151-R_24445	HBI01_07730	HBI05_24520	HBI04_12600	HBI02_21195	HBI03_20770	PS148-R_24185	PS15001_00620	PS15002_14560	PS16001_23765	PS16002_04090	PS16003_08700	PS16004_07550	PS16005_09330	PS184-R_24895	PS310-R_24415	PS378-R_24560	PS57-R_24570	RL316_19370	RL320_20365	RL97_24765	SA17021_12110	SA17022_12175	SA17023_04155	SA17024_24025	SA17101_07605	SB17032_10370	SB17033_14575	SB17034_16230	SB17035_18410	SB17036_05130	SB17037_13005	SB17038_09910	SB17039_04390	SB17040_10205	SB17042_23005
grpE		nucleotide exchange factor GrpE	46	46	1	99	7885				593	593	593	2E151-R_21750	HBI01_02795	HBI05_13030	HBI04_02830	HBI02_14425	HBI03_07035	PS148-R_21810	PS15001_10635	PS15002_17680	PS16001_26310	PS16002_07640	PS16003_24225	PS16004_10915	PS16005_03135	PS184-R_21960	PS310-R_22475	PS378-R_22215	PS57-R_21920	RL316_17740	RL320_05840	RL97_16520	SA17021_11175	SA17022_14710	SA17023_14345	SA17024_06310	SA17101_05950	SB17032_03155	SB17033_12945	SB17034_17805	SB17035_11515	SB17036_13435	SB17037_13845	SB17038_14375	SB17039_21045	SB17040_16775	SB17042_23670
ruvB		Holliday junction branch migration DNA helicase RuvB	46	46	1	99	9538				1010	1010	1010	2E151-R_09940	HBI01_00950	HBI05_15895	HBI04_03310	HBI02_22340	HBI03_01835	PS148-R_09710	PS15001_03790	PS15002_16470	PS16001_07155	PS16002_20665	PS16003_20760	PS16004_16545	PS16005_20700	PS184-R_01445	PS310-R_01280	PS378-R_06980	PS57-R_12435	RL316_12295	RL320_10430	RL97_10560	SA17021_08530	SA17022_21245	SA17023_19525	SA17024_12200	SA17101_00385	SB17032_19745	SB17033_15740	SB17034_04505	SB17035_03770	SB17036_22755	SB17037_02490	SB17038_19675	SB17039_17010	SB17040_13960	SB17042_13485
rbsR		ribose operon transcriptional repressor RbsR	46	46	1	99	4661				992	992	992	2E151-R_08630	HBI01_10020	HBI05_22310	HBI04_23370	HBI02_17035	HBI03_10375	PS148-R_07090	PS15001_11060	PS15002_15160	PS16001_00015	PS16002_01690	PS16003_23960	PS16004_09410	PS16005_01900	PS184-R_08265	PS310-R_08570	PS378-R_07765	PS57-R_06955	RL316_01430	RL320_07255	RL97_08080	SA17021_14060	SA17022_01300	SA17023_05165	SA17024_03575	SA17101_00830	SB17032_12655	SB17033_02525	SB17034_13275	SB17035_10225	SB17036_01595	SB17037_22035	SB17038_11605	SB17039_01085	SB17040_05810	SB17042_15640
rluC		23S rRNA pseudouridine(955/2504/2580) synthase RluC	46	46	1	99	645				959	959	959	2E151-R_03650	HBI01_23615	HBI05_14815	HBI04_12210	HBI02_00310	HBI03_02370	PS148-R_05410	PS15001_22235	PS15002_01435	PS16001_11880	PS16002_09910	PS16003_16020	PS16004_19590	PS16005_21310	PS184-R_06375	PS310-R_06680	PS378-R_04080	PS57-R_02300	RL316_24295	RL320_23020	RL97_06835	SA17021_13965	SA17022_08585	SA17023_02185	SA17024_17010	SA17101_02845	SB17032_04455	SB17033_02615	SB17034_19175	SB17035_05200	SB17036_17565	SB17037_02695	SB17038_12415	SB17039_04195	SB17040_18815	SB17042_09765
blc		lipocalin Blc	46	46	1	99	7374				533	533	533	2E151-R_22030	HBI01_12190	HBI05_20220	HBI04_19395	HBI02_17220	HBI03_11800	PS148-R_22485	PS15001_10810	PS15002_05860	PS16001_20740	PS16002_04415	PS16003_22960	PS16004_17750	PS16005_15310	PS184-R_22130	PS310-R_22855	PS378-R_22495	PS57-R_22495	RL316_08670	RL320_02050	RL97_15765	SA17021_06345	SA17022_11195	SA17023_14105	SA17024_23635	SA17101_23790	SB17032_22880	SB17033_09230	SB17034_07910	SB17035_00175	SB17036_24300	SB17037_04350	SB17038_13565	SB17039_07305	SB17040_07325	SB17042_14130
cysN		sulfate adenylyltransferase subunit CysN	46	46	1	99	8106				1427	1427	1427	2E151-R_16365	HBI01_08955	HBI05_15640	HBI04_19055	HBI02_17810	HBI03_18255	PS148-R_16030	PS15001_06045	PS15002_00390	PS16001_01655	PS16002_17605	PS16003_17950	PS16004_11590	PS16005_07360	PS184-R_15875	PS310-R_18140	PS378-R_15630	PS57-R_15470	RL316_18335	RL320_21405	RL97_14775	SA17021_19725	SA17022_08195	SA17023_15945	SA17024_25055	SA17101_06520	SB17032_01725	SB17033_13540	SB17034_15195	SB17035_19440	SB17036_06165	SB17037_19580	SB17038_10925	SB17039_06480	SB17040_11235	SB17042_17150
diaA		DnaA initiator-associating protein DiaA	46	46	1	99	9111				590	590	590	2E151-R_01410	HBI01_07030	HBI05_13310	HBI04_01690	HBI02_24315	HBI03_12965	PS148-R_00630	PS15001_06860	PS15002_21895	PS16001_09970	PS16002_25800	PS16003_02020	PS16004_03705	PS16005_08525	PS184-R_03365	PS310-R_04445	PS378-R_00630	PS57-R_00630	RL316_26250	RL320_24155	RL97_17120	SA17021_09680	SA17022_05895	SA17023_06205	SA17024_09255	SA17101_11135	SB17032_16925	SB17033_23375	SB17034_06365	SB17035_24140	SB17036_16550	SB17037_16440	SB17038_01945	SB17039_04735	SB17040_08130	SB17042_05645
uvrB		excinuclease ABC subunit UvrB	46	46	1	99	9927				2021	2021	2021	2E151-R_02200	HBI01_12785	HBI05_07610	HBI04_26430	HBI02_24095	HBI03_24370	PS148-R_03960	PS15001_23685	PS15002_02885	PS16001_05960	PS16002_11360	PS16003_14410	PS16004_19240	PS16005_17540	PS184-R_04925	PS310-R_05230	PS378-R_05530	PS57-R_03750	RL316_17335	RL320_15360	RL97_08830	SA17021_01370	SA17022_10035	SA17023_00035	SA17024_01085	SA17101_20490	SB17032_06385	SB17033_04940	SB17034_20625	SB17035_06865	SB17036_04060	SB17037_04145	SB17038_02905	SB17039_22205	SB17040_20265	SB17042_07545
bacA		undecaprenyl-diphosphate phosphatase	46	46	1	99	9213				821	821	821	2E151-R_00995	HBI01_06615	HBI05_22560	HBI04_24205	HBI02_10780	HBI03_15835	PS148-R_01045	PS15001_06445	PS15002_21480	PS16001_09555	PS16002_25385	PS16003_01605	PS16004_03290	PS16005_08110	PS184-R_03780	PS310-R_04030	PS378-R_01045	PS57-R_01045	RL316_25835	RL320_24570	RL97_16700	SA17021_10095	SA17022_05480	SA17023_05790	SA17024_08840	SA17101_10660	SB17032_05290	SB17033_23790	SB17034_06780	SB17035_23720	SB17036_09100	SB17037_16025	SB17038_02360	SB17039_12625	SB17040_09920	SB17042_06115
narH		nitrate reductase subunit beta	46	46	1	99	3231				1544	1544	1544	2E151-R_25120	HBI01_12640	HBI05_06970	HBI04_12960	HBI02_01380	HBI03_18920	PS148-R_24960	PS15001_19235	PS15002_19700	PS16001_20945	PS16002_12795	PS16003_16570	PS16004_17030	PS16005_22705	PS184-R_25265	PS310-R_25020	PS378-R_25165	PS57-R_25015	RL316_04115	RL320_10660	RL97_12115	SA17021_22115	SA17022_19270	SA17023_26305	SA17024_14445	SA17101_25395	SB17032_25585	SB17033_22705	SB17034_05270	SB17035_10195	SB17036_18305	SB17037_17405	SB17038_15190	SB17039_08705	SB17040_18175	SB17042_25650
nuoM		NADH-quinone oxidoreductase subunit M	46	46	1	99	10260				1529	1529	1529	2E151-R_04975	HBI01_10755	HBI05_05265	HBI04_18620	HBI02_25645	HBI03_24665	PS148-R_03255	PS15001_14495	PS15002_03250	PS16001_03285	PS16002_11770	PS16003_06605	PS16004_01840	PS16005_14085	PS184-R_07195	PS310-R_08005	PS378-R_03255	PS57-R_04475	RL316_14745	RL320_08545	RL97_20945	SA17021_22900	SA17022_02625	SA17023_09820	SA17024_17800	SA17101_04295	SB17032_13980	SB17033_06900	SB17034_12820	SB17035_21345	SB17036_15375	SB17037_06330	SB17038_06125	SB17039_02740	SB17040_01835	SB17042_01570
mdoC		glucans biosynthesis protein MdoC	46	46	1	99	685				1157	1157	1157	2E151-R_03460	HBI01_23805	HBI05_14615	HBI04_23450	HBI02_21355	HBI03_23120	PS148-R_05220	PS15001_22425	PS15002_01625	PS16001_17865	PS16002_10100	PS16003_12420	PS16004_19780	PS16005_18620	PS184-R_06185	PS310-R_06490	PS378-R_04270	PS57-R_02490	RL316_24485	RL320_23210	RL97_06645	SA17021_00125	SA17022_08775	SA17023_01995	SA17024_16820	SA17101_02655	SB17032_04265	SB17033_02805	SB17034_19365	SB17035_05010	SB17036_10075	SB17037_02885	SB17038_12605	SB17039_23465	SB17040_19005	SB17042_09575
guaC		GMP reductase	46	46	1	99	8868				1043	1043	1043	2E151-R_10905	HBI01_16380	HBI05_11110	HBI04_20125	HBI02_07635	HBI03_14225	PS148-R_07895	PS15001_12400	PS15002_25445	PS16001_12760	PS16002_23390	PS16003_11570	PS16004_23440	PS16005_24480	PS184-R_10475	PS310-R_10775	PS378-R_09720	PS57-R_07505	RL316_06415	RL320_04480	RL97_18730	SA17021_21535	SA17022_25990	SA17023_23190	SA17024_21445	SA17101_13050	SB17032_27500	SB17033_00540	SB17034_00370	SB17035_14075	SB17036_11345	SB17037_01145	SB17038_17285	SB17039_19655	SB17040_23325	SB17042_02445
aceA		isocitrate lyase	46	46	1	99	2486				1304	1304	1304	2E151-R_24265	HBI01_22525	HBI05_00960	HBI04_13830	HBI02_05385	HBI03_12260	PS148-R_24160	PS15001_15895	PS15002_12335	PS16001_08060	PS16002_02710	PS16003_04515	PS16004_17075	PS16005_12225	PS184-R_24440	PS310-R_20960	PS378-R_24535	PS57-R_24115	RL316_23895	RL320_06745	RL97_23010	SA17021_12055	SA17022_04080	SA17023_00750	SA17024_03535	SA17101_07710	SB17032_10105	SB17033_08990	SB17034_00985	SB17035_16020	SB17036_07700	SB17037_14305	SB17038_09720	SB17039_08240	SB17040_06595	SB17042_18085
oppD		murein tripeptide/oligopeptide ABC transporter ATP-binding protein OppD	46	46	1	99	6107				1013	1013	1013	2E151-R_16770	HBI01_08160	HBI05_25355	HBI04_25260	HBI02_02820	HBI03_12300	PS148-R_16490	PS15001_04545	PS15002_18755	PS16001_25475	PS16002_08840	PS16003_17090	PS16004_12375	PS16005_04790	PS184-R_16335	PS310-R_19025	PS378-R_16520	PS57-R_15930	RL316_13370	RL320_25315	RL97_21515	SA17021_25020	SA17022_18205	SA17023_02950	SA17024_20365	SA17101_19450	SB17032_12105	SB17033_07025	SB17034_13130	SB17035_16715	SB17036_09905	SB17037_18765	SB17038_00675	SB17039_25010	SB17040_03730	SB17042_24275
robA		MDR efflux pump AcrAB transcriptional activator RobA	46	46	1	99	8661				869	869	869	2E151-R_10290	HBI01_17000	HBI05_19030	HBI04_22650	HBI02_15080	HBI03_09155	PS148-R_07275	PS15001_20605	PS15002_24830	PS16001_13380	PS16002_24010	PS16003_10950	PS16004_24060	PS16005_23860	PS184-R_09855	PS310-R_10160	PS378-R_10340	PS57-R_08125	RL316_05800	RL320_03860	RL97_04425	SA17021_20915	SA17022_25370	SA17023_23810	SA17024_22065	SA17101_12460	SB17032_28115	SB17033_04385	SB17034_03630	SB17035_13455	SB17036_11970	SB17037_00525	SB17038_16660	SB17039_19035	SB17040_22705	SB17042_03055
pta		phosphate acetyltransferase	46	46	1	99	10239				2144	2144	2144	2E151-R_05080	HBI01_10860	HBI05_05370	HBI04_14605	HBI02_25750	HBI03_07165	PS148-R_03360	PS15001_14390	PS15002_03145	PS16001_03390	PS16002_11875	PS16003_06710	PS16004_01735	PS16005_14190	PS184-R_07090	PS310-R_08110	PS378-R_03360	PS57-R_04370	RL316_14640	RL320_08650	RL97_22030	SA17021_13290	SA17022_02730	SA17023_09925	SA17024_17905	SA17101_04400	SB17032_14085	SB17033_06795	SB17034_12715	SB17035_21240	SB17036_15270	SB17037_06225	SB17038_06230	SB17039_02635	SB17040_01730	SB17042_01465
pgl		6-phosphogluconolactonase	46	46	1	99	9912				995	995	995	2E151-R_02140	HBI01_04975	HBI05_19595	HBI04_26495	HBI02_11025	HBI03_03790	PS148-R_03900	PS15001_12050	PS15002_09695	PS16001_16650	PS16002_09175	PS16003_09565	PS16004_13660	PS16005_10845	PS184-R_04865	PS310-R_05170	PS378-R_05590	PS57-R_03810	RL316_17395	RL320_15420	RL97_08770	SA17021_01540	SA17022_06870	SA17023_12550	SA17024_01145	SA17101_20430	SB17032_06320	SB17033_05000	SB17034_20685	SB17035_06925	SB17036_04000	SB17037_11505	SB17038_02965	SB17039_22145	SB17040_20325	SB17042_07485
argP		DNA-binding transcriptional regulator ArgP	46	46	1	99	7467				893	893	893	2E151-R_15875	HBI01_16050	HBI05_24415	HBI04_00485	HBI02_23000	HBI03_17680	PS148-R_15595	PS15001_00495	PS15002_14435	PS16001_23890	PS16002_03965	PS16003_08575	PS16004_07425	PS16005_09455	PS184-R_14985	PS310-R_16990	PS378-R_15145	PS57-R_14580	RL316_19245	RL320_20490	RL97_24890	SA17021_20635	SA17022_12300	SA17023_04030	SA17024_24150	SA17101_07475	SB17032_05645	SB17033_14450	SB17034_16105	SB17035_18535	SB17036_05255	SB17037_12880	SB17038_10035	SB17039_04265	SB17040_10330	SB17042_22255
aas		bifunctional acyl-ACP--phospholipid O-acyltransferase/long-chain-fatty-acid--ACP ligase	46	46	1	99	7684				2159	2159	2159	2E151-R_15545	HBI01_15715	HBI05_21060	HBI04_21410	HBI02_00475	HBI03_20930	PS148-R_15265	PS15001_00160	PS15002_14100	PS16001_24220	PS16002_03635	PS16003_08240	PS16004_07095	PS16005_09790	PS184-R_15315	PS310-R_16660	PS378-R_14815	PS57-R_14910	RL316_18910	RL320_20825	RL97_05200	SA17021_20300	SA17022_12635	SA17023_03695	SA17024_24480	SA17101_06980	SB17032_01260	SB17033_14115	SB17034_15770	SB17035_18870	SB17036_05590	SB17037_12545	SB17038_10370	SB17039_05905	SB17040_10660	SB17042_12725
artI		Putative ABC transporter arginine-binding protein 2	46	46	1	99	10024				731	731	731	2E151-R_02630	HBI01_13215	HBI05_07125	HBI04_05125	HBI02_04985	HBI03_01185	PS148-R_04390	PS15001_23255	PS15002_02455	PS16001_05530	PS16002_10930	PS16003_14840	PS16004_14850	PS16005_19690	PS184-R_05355	PS310-R_05660	PS378-R_05100	PS57-R_03320	RL316_16905	RL320_14930	RL97_09260	SA17021_00940	SA17022_09605	SA17023_00465	SA17024_00655	SA17101_01760	SB17032_23275	SB17033_04510	SB17034_20195	SB17035_06435	SB17036_04490	SB17037_03715	SB17038_02475	SB17039_22635	SB17040_19835	SB17042_18705
lpxD		UDP-3-O-(3-hydroxymyristoyl)glucosamine N-acyltransferase	46	46	1	99	8758				1025	1025	1025	2E151-R_11330	HBI01_24180	HBI05_01745	HBI04_17810	HBI02_03585	HBI03_17195	PS148-R_08320	PS15001_07395	PS15002_25870	PS16001_12335	PS16002_22975	PS16003_11995	PS16004_23015	PS16005_24905	PS184-R_10900	PS310-R_11200	PS378-R_09295	PS57-R_07080	RL316_06840	RL320_04905	RL97_04985	SA17021_21970	SA17022_26415	SA17023_11665	SA17024_21020	SA17101_13440	SB17032_27100	SB17033_00115	SB17034_00795	SB17035_14500	SB17036_10920	SB17037_10815	SB17038_17710	SB17039_20080	SB17040_23750	SB17042_02045
chbR		transcriptional regulator ChbR	46	46	1	99	9386				839	839	839	2E151-R_05980	HBI01_19445	HBI05_23620	HBI04_12675	HBI02_01605	HBI03_00420	PS148-R_10340	PS15001_24985	PS15002_07280	PS16001_21760	PS16002_21305	PS16003_25120	PS16004_26060	PS16005_19850	PS184-R_00805	PS310-R_01920	PS378-R_07620	PS57-R_09100	RL316_21835	RL320_00490	RL97_03920	SA17021_07890	SA17022_20605	SA17023_18890	SA17024_11560	SA17101_21890	SB17032_20410	SB17033_25470	SB17034_16770	SB17035_14975	SB17036_18930	SB17037_07700	SB17038_07765	SB17039_16370	SB17040_14605	SB17042_10770
yfhH		MurR/RpiR family transcriptional regulator	46	46	1	99	262				848	848	848	2E151-R_15145	HBI01_20285	HBI05_06510	HBI04_23870	HBI02_15930	HBI03_01260	PS148-R_14260	PS15001_13225	PS15002_08975	PS16001_04555	PS16002_08045	PS16003_07880	PS16004_06745	PS16005_02895	PS184-R_14105	PS310-R_12260	PS378-R_11460	PS57-R_14305	RL316_09600	RL320_25975	RL97_10900	SA17021_03525	SA17022_03895	SA17023_20435	SA17024_02485	SA17101_05745	SB17032_15620	SB17033_07720	SB17034_11545	SB17035_20070	SB17036_04810	SB17037_15670	SB17038_07395	SB17039_09220	SB17040_00565	SB17042_00165
fabB		beta-ketoacyl-ACP synthase I	46	46	1	99	560				1220	1220	1220	2E151-R_05210	HBI01_10990	HBI05_05500	HBI04_14750	HBI02_25880	HBI03_16810	PS148-R_03490	PS15001_14260	PS15002_03015	PS16001_03520	PS16002_12005	PS16003_06840	PS16004_01605	PS16005_14320	PS184-R_06960	PS310-R_08240	PS378-R_03490	PS57-R_04240	RL316_14510	RL320_08780	RL97_22160	SA17021_13420	SA17022_02860	SA17023_10055	SA17024_18035	SA17101_04530	SB17032_14230	SB17033_06665	SB17034_12585	SB17035_21110	SB17036_15140	SB17037_06095	SB17038_06360	SB17039_02505	SB17040_01600	SB17042_01320
pyrE		Orotate phosphoribosyltransferase	46	46	1	99	4805				641	641	641	2E151-R_07860	HBI01_04630	HBI05_08710	HBI04_19895	HBI02_04160	HBI03_07740	PS148-R_06320	PS15001_05630	PS15002_06315	PS16001_00785	PS16002_00920	PS16003_03840	PS16004_07785	PS16005_01130	PS184-R_09035	PS310-R_09340	PS378-R_08535	PS57-R_06185	RL316_03075	RL320_09420	RL97_08260	SA17021_14830	SA17022_00530	SA17023_04395	SA17024_04345	SA17101_01460	SB17032_18535	SB17033_01755	SB17034_02170	SB17035_06110	SB17036_00825	SB17037_21265	SB17038_21520	SB17039_01855	SB17040_05040	SB17042_19315
frsA		esterase FrsA	46	46	1	99	3661				1244	1244	1244	2E151-R_22960	HBI01_19015	HBI05_18535	HBI04_10405	HBI02_09910	HBI03_03925	PS148-R_22885	PS15001_17445	PS15002_19490	PS16001_10725	PS16002_07280	PS16003_18895	PS16004_20960	PS16005_17955	PS184-R_23060	PS310-R_23285	PS378-R_23425	PS57-R_22995	RL316_04320	RL320_03475	RL97_20320	SA17021_23850	SA17022_22735	SA17023_21785	SA17024_06560	SA17101_15410	SB17032_05920	SB17033_22545	SB17034_06065	SB17035_23030	SB17036_00145	SB17037_11070	SB17038_11735	SB17039_05495	SB17040_26120	SB17042_23515
malG		maltose ABC transporter permease MalG	46	46	1	99	2514				890	890	890	2E151-R_24135	HBI01_22395	HBI05_00840	HBI04_06725	HBI02_00680	HBI03_06200	PS148-R_24030	PS15001_02650	PS15002_12465	PS16001_08190	PS16002_02840	PS16003_04645	PS16004_17205	PS16005_12355	PS184-R_24570	PS310-R_21090	PS378-R_24405	PS57-R_24245	RL316_23765	RL320_06610	RL97_22880	SA17021_11925	SA17022_04210	SA17023_00880	SA17024_03405	SA17101_07825	SB17032_09960	SB17033_08860	SB17034_01115	SB17035_11320	SB17036_07830	SB17037_14435	SB17038_09590	SB17039_08110	SB17040_06465	SB17042_17945
fabF		beta-ketoacyl-ACP synthase II	46	46	1	99	636				1241	1241	1241	2E151-R_03700	HBI01_23565	HBI05_14865	HBI04_12160	HBI02_00260	HBI03_02320	PS148-R_05460	PS15001_22185	PS15002_01385	PS16001_11930	PS16002_09860	PS16003_15970	PS16004_19540	PS16005_21360	PS184-R_06425	PS310-R_06730	PS378-R_04030	PS57-R_02250	RL316_24245	RL320_22970	RL97_06885	SA17021_13915	SA17022_08535	SA17023_02235	SA17024_17065	SA17101_02895	SB17032_04505	SB17033_02565	SB17034_19125	SB17035_05250	SB17036_17615	SB17037_02645	SB17038_12365	SB17039_04145	SB17040_18765	SB17042_09815
secE		preprotein translocase subunit SecE	46	46	1	99	6776				383	383	383	2E151-R_24895	HBI01_15290	HBI05_14095	HBI04_15100	HBI02_14950	HBI03_13910	PS148-R_24635	PS15001_11740	PS15002_11775	PS16001_13695	PS16002_12745	PS16003_14065	PS16004_21855	PS16005_23160	PS184-R_25175	PS310-R_25000	PS378-R_25145	PS57-R_24860	RL316_16070	RL320_17895	RL97_10295	SA17021_16460	SA17022_15720	SA17023_24360	SA17024_15715	SA17101_16150	SB17032_10985	SB17033_19680	SB17034_17195	SB17035_12850	SB17036_17470	SB17037_16015	SB17038_20405	SB17039_13305	SB17040_16295	SB17042_24040
hisG		ATP phosphoribosyltransferase	46	46	1	99	9779				899	899	899	2E151-R_08725	HBI01_05545	HBI05_11675	HBI04_26010	HBI02_00210	HBI03_02840	PS148-R_08495	PS15001_19825	PS15002_10925	PS16001_17435	PS16002_14060	PS16003_16135	PS16004_08350	PS16005_13545	PS184-R_02655	PS310-R_00065	PS378-R_05765	PS57-R_20145	RL316_04635	RL320_06905	RL97_25015	SA17021_03280	SA17022_22460	SA17023_15745	SA17024_26380	SA17101_17240	SB17032_29030	SB17033_14820	SB17034_10630	SB17035_18110	SB17036_02565	SB17037_26090	SB17038_22870	SB17039_23845	SB17040_12745	SB17042_08935
yjbB		Uncharacterized protein YjbB	46	46	1	99	2492				1631	1631	1631	2E151-R_24235	HBI01_22495	HBI05_00935	HBI04_13800	HBI02_00780	HBI03_06555	PS148-R_24130	PS15001_15865	PS15002_12365	PS16001_08090	PS16002_02740	PS16003_04545	PS16004_17105	PS16005_12255	PS184-R_24470	PS310-R_20990	PS378-R_24505	PS57-R_24145	RL316_23865	RL320_06715	RL97_22980	SA17021_12025	SA17022_04110	SA17023_00780	SA17024_03505	SA17101_07745	SB17032_10070	SB17033_08960	SB17034_01015	SB17035_11420	SB17036_07730	SB17037_14335	SB17038_09690	SB17039_08210	SB17040_06565	SB17042_18055
brnQ		branched-chain amino acid transporter carrier protein BrnQ	46	46	1	99	1945				1319	1319	1319	2E151-R_11940	HBI01_14020	HBI05_09125	HBI04_07935	HBI02_18255	HBI03_01915	PS148-R_11660	PS15001_01280	PS15002_04595	PS16001_06490	PS16002_02185	PS16003_10295	PS16004_00735	PS16005_16860	PS184-R_11510	PS310-R_12910	PS378-R_12100	PS57-R_10055	RL316_00920	RL320_11230	RL97_14160	SA17021_04965	SA17022_23190	SA17023_10905	SA17024_07365	SA17101_14105	SB17032_02860	SB17033_09870	SB17034_09095	SB17035_08595	SB17036_06760	SB17037_24085	SB17038_25715	SB17039_11550	SB17040_17510	SB17042_14955
group_10179	thrS	threonine--tRNA ligase	46	46	1	99	9366				1928	1928	1928	2E151-R_06055	HBI01_19370	HBI05_23090	HBI04_09505	HBI02_22365	HBI03_01515	PS148-R_10415	PS15001_25060	PS15002_07355	PS16001_21835	PS16002_21380	PS16003_25195	PS16004_09685	PS16005_19925	PS184-R_00730	PS310-R_01995	PS378-R_07695	PS57-R_09025	RL316_21910	RL320_00565	RL97_03280	SA17021_07815	SA17022_20530	SA17023_18815	SA17024_11485	SA17101_21810	SB17032_20490	SB17033_17650	SB17034_16845	SB17035_15050	SB17036_18855	SB17037_07780	SB17038_07840	SB17039_16295	SB17040_14680	SB17042_10850
appB		cytochrome d ubiquinol oxidase subunit II	46	46	1	99	766				1136	1136	1136	2E151-R_03170	HBI01_01815	HBI05_14345	HBI04_10635	HBI02_15400	HBI03_21515	PS148-R_04930	PS15001_22715	PS15002_01915	PS16001_18150	PS16002_10390	PS16003_15380	PS16004_20070	PS16005_18910	PS184-R_05895	PS310-R_06200	PS378-R_04560	PS57-R_02780	RL316_16365	RL320_14390	RL97_06355	SA17021_00400	SA17022_09065	SA17023_01705	SA17024_16530	SA17101_02360	SB17032_21790	SB17033_03095	SB17034_19655	SB17035_04720	SB17036_10365	SB17037_03175	SB17038_12895	SB17039_23175	SB17040_19295	SB17042_15220
dauA		C4-dicarboxylic acid transporter DauA	46	46	1	99	6060				1652	1652	1652	2E151-R_18995	HBI01_08405	HBI05_25140	HBI04_25475	HBI02_07335	HBI03_17910	PS148-R_18240	PS15001_04795	PS15002_19005	PS16001_25725	PS16002_08590	PS16003_16840	PS16004_00045	PS16005_04540	PS184-R_18085	PS310-R_15505	PS378-R_18120	PS57-R_17685	RL316_13620	RL320_25565	RL97_21765	SA17021_24770	SA17022_18455	SA17023_02700	SA17024_20615	SA17101_19665	SB17032_12440	SB17033_07275	SB17034_11005	SB17035_16465	SB17036_09655	SB17037_19015	SB17038_00425	SB17039_25260	SB17040_03980	SB17042_10295
dxs		1-deoxy-D-xylulose-5-phosphate synthase	46	46	1	99	1967				1862	1862	1862	2E151-R_12035	HBI01_14115	HBI05_12530	HBI04_08030	HBI02_25975	HBI03_02010	PS148-R_11755	PS15001_01375	PS15002_04500	PS16001_06585	PS16002_02090	PS16003_10390	PS16004_00640	PS16005_16955	PS184-R_11605	PS310-R_13005	PS378-R_12005	PS57-R_10150	RL316_00825	RL320_11135	RL97_14065	SA17021_04870	SA17022_23285	SA17023_10810	SA17024_07460	SA17101_14200	SB17032_13055	SB17033_09775	SB17034_09000	SB17035_08500	SB17036_06665	SB17037_23990	SB17038_25620	SB17039_11455	SB17040_00020	SB17042_14845
paeA		Polyamine export protein	46	46	1	99	6566				1343	1343	1343	2E151-R_12735	HBI01_02345	HBI05_02970	HBI04_10100	HBI02_04870	HBI03_12090	PS148-R_12860	PS15001_17795	PS15002_05475	PS16001_20350	PS16002_04805	PS16003_22570	PS16004_08935	PS16005_15700	PS184-R_12305	PS310-R_14110	PS378-R_12910	PS57-R_10850	RL316_09060	RL320_02440	RL97_15375	SA17021_05955	SA17022_10805	SA17023_13715	SA17024_23250	SA17101_24135	SB17032_08380	SB17033_10635	SB17034_08300	SB17035_00565	SB17036_24690	SB17037_04740	SB17038_13955	SB17039_06915	SB17040_06935	SB17042_19130
hemL		glutamate-1-semialdehyde 2,1-aminomutase	46	46	1	99	8785				1280	1280	1280	2E151-R_11195	HBI01_24045	HBI05_01605	HBI04_17945	HBI02_03445	HBI03_17060	PS148-R_08185	PS15001_07530	PS15002_25735	PS16001_12470	PS16002_23100	PS16003_11860	PS16004_23150	PS16005_24770	PS184-R_10765	PS310-R_11065	PS378-R_09430	PS57-R_07215	RL316_06705	RL320_04770	RL97_04850	SA17021_21830	SA17022_26280	SA17023_11800	SA17024_21155	SA17101_13300	SB17032_27235	SB17033_00250	SB17034_00660	SB17035_14365	SB17036_11055	SB17037_10680	SB17038_17575	SB17039_19945	SB17040_23615	SB17042_02180
udk		uridine kinase	46	46	1	99	1230				641	641	641	2E151-R_24395	HBI01_18790	HBI05_04605	HBI04_12050	HBI02_04480	HBI03_15385	PS148-R_02145	PS15001_15600	PS15002_13310	PS16001_02175	PS16002_15970	PS16003_05495	PS16004_05050	PS16005_11390	PS184-R_24625	PS310-R_24365	PS378-R_02145	PS57-R_24300	RL316_15850	RL320_12245	RL97_24565	SA17021_12475	SA17022_01520	SA17023_08705	SA17024_19570	SA17101_17545	SB17032_24780	SB17033_19350	SB17034_14845	SB17035_22450	SB17036_03690	SB17037_20200	SB17038_05015	SB17039_03850	SB17040_02945	SB17042_08695
pepQ		Xaa-Pro dipeptidase	46	46	1	99	4345				1331	1331	1331	2E151-R_18045	HBI01_22920	HBI05_20500	HBI04_00840	HBI02_20055	HBI03_13715	PS148-R_18410	PS15001_24270	PS15002_23625	PS16001_24670	PS16002_24200	PS16003_26545	PS16004_22010	PS16005_26040	PS184-R_18255	PS310-R_20350	PS378-R_19165	PS57-R_17855	RL316_08485	RL320_08990	RL97_11475	SA17021_26420	SA17022_13690	SA17023_22810	SA17024_13295	SA17101_09770	SB17032_00385	SB17033_20170	SB17034_22435	SB17035_25665	SB17036_16580	SB17037_22970	SB17038_15265	SB17039_14460	SB17040_12130	SB17042_17225
rraB		ribonuclease E inhibitor RraB	46	46	1	99	6535				416	416	416	2E151-R_12905	HBI01_02175	HBI05_02800	HBI04_08675	HBI02_00800	HBI03_11360	PS148-R_12690	PS15001_17965	PS15002_05305	PS16001_20180	PS16002_04975	PS16003_22400	PS16004_08765	PS16005_15870	PS184-R_12475	PS310-R_13940	PS378-R_13080	PS57-R_11020	RL316_09230	RL320_02610	RL97_15205	SA17021_05785	SA17022_10635	SA17023_13545	SA17024_23080	SA17101_24320	SB17032_08560	SB17033_10465	SB17034_08470	SB17035_00735	SB17036_24860	SB17037_04910	SB17038_14125	SB17039_06745	SB17040_06765	SB17042_18945
hypA		hydrogenase maturation nickel metallochaperone HypA	46	46	1	99	9297				341	341	341	2E151-R_00605	HBI01_17465	HBI05_04420	HBI04_23020	HBI02_16560	HBI03_05560	PS148-R_01435	PS15001_09545	PS15002_21090	PS16001_09160	PS16002_24995	PS16003_01215	PS16004_04675	PS16005_07715	PS184-R_04170	PS310-R_03640	PS378-R_01435	PS57-R_01435	RL316_25445	RL320_24960	RL97_23545	SA17021_10485	SA17022_05090	SA17023_05400	SA17024_08450	SA17101_10345	SB17032_04995	SB17033_24180	SB17034_07170	SB17035_02140	SB17036_08710	SB17037_01585	SB17038_01085	SB17039_00835	SB17040_09530	SB17042_06410
metI		D-methionine transport system permease protein MetI	46	46	1	99	8738				653	653	653	2E151-R_11430	HBI01_24280	HBI05_01845	HBI04_17710	HBI02_03685	HBI03_17295	PS148-R_08420	PS15001_07295	PS15002_25970	PS16001_12235	PS16002_22875	PS16003_12095	PS16004_22915	PS16005_25005	PS184-R_11000	PS310-R_11300	PS378-R_09195	PS57-R_06980	RL316_06940	RL320_05005	RL97_05085	SA17021_22070	SA17022_26515	SA17023_11565	SA17024_20920	SA17101_13540	SB17032_26995	SB17033_00015	SB17034_00895	SB17035_14600	SB17036_21435	SB17037_10915	SB17038_17810	SB17039_20180	SB17040_23850	SB17042_01940
hisP		histidine ABC transporter ATP-binding protein HisP	46	46	1	99	10229				773	773	773	2E151-R_05120	HBI01_10900	HBI05_05415	HBI04_14650	HBI02_25795	HBI03_07205	PS148-R_03400	PS15001_14350	PS15002_03105	PS16001_03430	PS16002_11915	PS16003_06750	PS16004_01695	PS16005_14230	PS184-R_07050	PS310-R_08150	PS378-R_03400	PS57-R_04330	RL316_14600	RL320_08690	RL97_22070	SA17021_13330	SA17022_02770	SA17023_09965	SA17024_17945	SA17101_04445	SB17032_14130	SB17033_06755	SB17034_12675	SB17035_21200	SB17036_15230	SB17037_06185	SB17038_06270	SB17039_02595	SB17040_01690	SB17042_01420
ahpA		YtjB family periplasmic protein	46	46	1	99	8650				644	644	644	2E151-R_10245	HBI01_17045	HBI05_18980	HBI04_22705	HBI02_15010	HBI03_09100	PS148-R_07230	PS15001_20560	PS15002_24785	PS16001_13425	PS16002_24055	PS16003_10905	PS16004_24105	PS16005_23815	PS184-R_09810	PS310-R_10115	PS378-R_10385	PS57-R_08170	RL316_05755	RL320_03815	RL97_04470	SA17021_20870	SA17022_25325	SA17023_23855	SA17024_22110	SA17101_25270	SB17032_28170	SB17033_04340	SB17034_03585	SB17035_13410	SB17036_12015	SB17037_00480	SB17038_16615	SB17039_18990	SB17040_22660	SB17042_03105
alaA		alanine transaminase AlaA	46	46	1	99	10246				1217	1217	1217	2E151-R_05045	HBI01_10825	HBI05_05335	HBI04_14570	HBI02_25715	HBI03_07130	PS148-R_03325	PS15001_14425	PS15002_03180	PS16001_03355	PS16002_11840	PS16003_06675	PS16004_01770	PS16005_14155	PS184-R_07125	PS310-R_08075	PS378-R_03325	PS57-R_04405	RL316_14675	RL320_08615	RL97_21995	SA17021_13255	SA17022_02695	SA17023_09890	SA17024_17870	SA17101_04365	SB17032_14050	SB17033_06830	SB17034_12750	SB17035_21275	SB17036_15305	SB17037_06260	SB17038_06195	SB17039_02670	SB17040_01765	SB17042_01500
yjiA		GTPase	46	46	1	99	8603				956	956	956	2E151-R_13355	HBI01_11800	HBI05_24200	HBI04_16315	HBI02_05900	HBI03_16495	PS148-R_12240	PS15001_07925	PS15002_24320	PS16001_19735	PS16002_19400	PS16003_21955	PS16004_11905	PS16005_16385	PS184-R_12920	PS310-R_13495	PS378-R_13535	PS57-R_11465	RL316_05380	RL320_16395	RL97_01640	SA17021_24235	SA17022_24795	SA17023_16660	SA17024_22630	SA17101_25015	SB17032_28385	SB17033_03805	SB17034_03060	SB17035_01655	SB17036_12540	SB17037_13220	SB17038_16085	SB17039_18465	SB17040_22130	SB17042_03330
metE		5-methyltetrahydropteroyltriglutamate--homocysteine S-methyltransferase	46	46	1	99	4457				2261	2261	2261	2E151-R_18245	HBI01_20865	HBI05_20415	HBI04_09360	HBI02_19970	HBI03_13870	PS148-R_18610	PS15001_24075	PS15002_17025	PS16001_15780	PS16002_24405	PS16003_02680	PS16004_22215	PS16005_00710	PS184-R_18455	PS310-R_20150	PS378-R_18970	PS57-R_18050	RL316_11155	RL320_01175	RL97_00025	SA17021_23630	SA17022_13490	SA17023_22600	SA17024_13495	SA17101_09685	SB17032_00470	SB17033_25230	SB17034_22235	SB17035_25865	SB17036_16780	SB17037_23170	SB17038_15465	SB17039_14660	SB17040_12325	SB17042_17310
yaiW		surface-exposed outer membrane lipoprotein YaiW	46	46	1	99	1920				1094	1094	1094	2E151-R_11825	HBI01_24510	HBI05_09240	HBI04_19745	HBI02_18370	HBI03_18645	PS148-R_11545	PS15001_01165	PS15002_04710	PS16001_06375	PS16002_02300	PS16003_10180	PS16004_00850	PS16005_16745	PS184-R_11395	PS310-R_12795	PS378-R_12215	PS57-R_09940	RL316_01035	RL320_11345	RL97_19610	SA17021_05080	SA17022_23075	SA17023_11020	SA17024_07250	SA17101_13995	SB17032_02745	SB17033_09985	SB17034_09210	SB17035_01260	SB17036_06875	SB17037_24200	SB17038_25830	SB17039_11665	SB17040_17625	SB17042_15070
hybC		hydrogenase 2 large subunit	46	46	1	99	9294				1703	1703	1703	2E151-R_00620	HBI01_17450	HBI05_04435	HBI04_23035	HBI02_16545	HBI03_05575	PS148-R_01420	PS15001_09560	PS15002_21105	PS16001_09175	PS16002_25010	PS16003_01230	PS16004_04660	PS16005_07730	PS184-R_04155	PS310-R_03655	PS378-R_01420	PS57-R_01420	RL316_25460	RL320_24945	RL97_23530	SA17021_10470	SA17022_05105	SA17023_05415	SA17024_08465	SA17101_10360	SB17032_05010	SB17033_24165	SB17034_07155	SB17035_02155	SB17036_08725	SB17037_01570	SB17038_01070	SB17039_00820	SB17040_09545	SB17042_06395
fruB		fused PTS fructose transporter subunit IIA/HPr protein	46	46	1	99	56				1130	1130	1130	2E151-R_04410	HBI01_18250	HBI05_09990	HBI04_17240	HBI02_06265	HBI03_11030	PS148-R_02690	PS15001_15060	PS15002_03815	PS16001_02720	PS16002_15430	PS16003_06040	PS16004_02805	PS16005_14675	PS184-R_07760	PS310-R_07440	PS378-R_02690	PS57-R_05040	RL316_15310	RL320_12790	RL97_05740	SA17021_13015	SA17022_02060	SA17023_09250	SA17024_20110	SA17101_03800	SB17032_24205	SB17033_18805	SB17034_14305	SB17035_21910	SB17036_03150	SB17037_06895	SB17038_05560	SB17039_03305	SB17040_02400	SB17042_08110
putP		sodium/proline symporter PutP	46	46	1	99	711				1508	1508	1508	2E151-R_03320	HBI01_01965	HBI05_14490	HBI04_10795	HBI02_01505	HBI03_21665	PS148-R_05080	PS15001_22565	PS15002_01765	PS16001_18000	PS16002_10240	PS16003_20580	PS16004_19920	PS16005_18760	PS184-R_06045	PS310-R_06350	PS378-R_04410	PS57-R_02630	RL316_24625	RL320_23350	RL97_06505	SA17021_00250	SA17022_08915	SA17023_01855	SA17024_16680	SA17101_02540	SB17032_21965	SB17033_02945	SB17034_19505	SB17035_04870	SB17036_10215	SB17037_03025	SB17038_12745	SB17039_23325	SB17040_19145	SB17042_09295
ydjK		Putative metabolite transport protein YdjK	46	46	1	99	9429				1379	1379	1379	2E151-R_05775	HBI01_19650	HBI05_23820	HBI04_12875	HBI02_21875	HBI03_00625	PS148-R_10135	PS15001_24780	PS15002_07075	PS16001_21555	PS16002_21100	PS16003_24915	PS16004_25855	PS16005_21580	PS184-R_01010	PS310-R_01715	PS378-R_07415	PS57-R_09305	RL316_21630	RL320_00285	RL97_03715	SA17021_08095	SA17022_20810	SA17023_19095	SA17024_11765	SA17101_22095	SB17032_20205	SB17033_25675	SB17034_04070	SB17035_08755	SB17036_19135	SB17037_07495	SB17038_20110	SB17039_16575	SB17040_14395	SB17042_10565
mltF		membrane-bound lytic murein transglycosylase MltF	46	46	1	99	265				1556	1556	1556	2E151-R_15130	HBI01_20300	HBI05_06495	HBI04_23855	HBI02_15915	HBI03_01245	PS148-R_14275	PS15001_13240	PS15002_08960	PS16001_04540	PS16002_08030	PS16003_07865	PS16004_06760	PS16005_02880	PS184-R_14120	PS310-R_12245	PS378-R_11445	PS57-R_14290	RL316_09615	RL320_25990	RL97_10915	SA17021_03540	SA17022_03880	SA17023_20450	SA17024_02500	SA17101_05730	SB17032_15605	SB17033_07735	SB17034_11560	SB17035_20085	SB17036_04795	SB17037_15685	SB17038_07380	SB17039_09205	SB17040_00580	SB17042_00180
xylF		D-xylose ABC transporter substrate-binding protein	46	46	1	99	7148				992	992	992	2E151-R_07485	HBI01_06400	HBI05_16175	HBI04_03695	HBI02_16215	HBI03_08145	PS148-R_05945	PS15001_05255	PS15002_06690	PS16001_01160	PS16002_00545	PS16003_04215	PS16004_05490	PS16005_00270	PS184-R_09410	PS310-R_09715	PS378-R_08910	PS57-R_05810	RL316_02700	RL320_09795	RL97_23950	SA17021_15205	SA17022_00155	SA17023_15045	SA17024_04720	SA17101_13665	SB17032_18920	SB17033_01380	SB17034_02545	SB17035_05735	SB17036_00450	SB17037_20890	SB17038_21895	SB17039_02230	SB17040_04665	SB17042_03640
napA		nitrate reductase catalytic subunit NapA	46	46	1	99	10348				2486	2486	2486	2E151-R_04605	HBI01_18055	HBI05_21710	HBI04_17425	HBI02_09445	HBI03_11220	PS148-R_02885	PS15001_14865	PS15002_03620	PS16001_02915	PS16002_15230	PS16003_06235	PS16004_02610	PS16005_14870	PS184-R_07565	PS310-R_07635	PS378-R_02885	PS57-R_04845	RL316_15115	RL320_13065	RL97_05545	SA17021_13210	SA17022_02255	SA17023_09450	SA17024_14645	SA17101_03980	SB17032_24020	SB17033_18610	SB17034_18590	SB17035_21715	SB17036_02955	SB17037_06700	SB17038_05755	SB17039_03110	SB17040_02205	SB17042_07925
aroL		shikimate kinase AroL	46	46	1	99	1930				524	524	524	2E151-R_11875	HBI01_13955	HBI05_09190	HBI04_07870	HBI02_18320	HBI03_01850	PS148-R_11595	PS15001_01215	PS15002_04660	PS16001_06425	PS16002_02250	PS16003_10230	PS16004_00800	PS16005_16795	PS184-R_11445	PS310-R_12845	PS378-R_12165	PS57-R_09990	RL316_00985	RL320_11295	RL97_14225	SA17021_05030	SA17022_23125	SA17023_10970	SA17024_07300	SA17101_14045	SB17032_02795	SB17033_09935	SB17034_09160	SB17035_01310	SB17036_06825	SB17037_24150	SB17038_25780	SB17039_11615	SB17040_17575	SB17042_15020
fabY		fatty acid biosynthesis protein FabY	46	46	1	99	1045				941	941	941	2E151-R_20890	HBI01_10265	HBI05_07875	HBI04_25710	HBI02_21520	HBI03_00330	PS148-R_21130	PS15001_16400	PS15002_00985	PS16001_11400	PS16002_05610	PS16003_00795	PS16004_06150	PS16005_03700	PS184-R_20990	PS310-R_17585	PS378-R_21355	PS57-R_20950	RL316_03620	RL320_15700	RL97_01425	SA17021_17095	SA17022_11820	SA17023_07245	SA17024_10090	SA17101_09120	SB17032_09510	SB17033_18290	SB17034_24390	SB17035_09915	SB17036_07075	SB17037_09145	SB17038_04625	SB17039_00195	SB17040_08620	SB17042_20510
mukF		chromosome partition protein MukF	46	46	1	99	826				1322	1322	1322	2E151-R_02920	HBI01_01565	HBI05_04925	HBI04_00165	HBI02_18940	HBI03_21265	PS148-R_04680	PS15001_22965	PS15002_02165	PS16001_05240	PS16002_10640	PS16003_15130	PS16004_14560	PS16005_02170	PS184-R_05645	PS310-R_05950	PS378-R_04810	PS57-R_03030	RL316_16615	RL320_14640	RL97_06105	SA17021_00650	SA17022_09315	SA17023_16350	SA17024_16280	SA17101_02065	SB17032_21495	SB17033_03345	SB17034_19905	SB17035_04470	SB17036_10615	SB17037_03425	SB17038_13145	SB17039_22925	SB17040_19545	SB17042_15520
gcvT		glycine cleavage system aminomethyltransferase GcvT	46	46	1	99	7450				1094	1094	1094	2E151-R_15805	HBI01_15980	HBI05_10690	HBI04_21530	HBI02_23080	HBI03_17750	PS148-R_15525	PS15001_00425	PS15002_14365	PS16001_23960	PS16002_03895	PS16003_08500	PS16004_07355	PS16005_09525	PS184-R_15055	PS310-R_16920	PS378-R_15075	PS57-R_14650	RL316_19175	RL320_20560	RL97_05465	SA17021_20565	SA17022_12370	SA17023_03960	SA17024_24220	SA17101_07390	SB17032_05715	SB17033_14380	SB17034_16035	SB17035_18605	SB17036_05325	SB17037_12810	SB17038_10105	SB17039_05640	SB17040_10400	SB17042_22185
ccmE		cytochrome c maturation protein CcmE	46	46	1	99	10360				479	479	479	2E151-R_04560	HBI01_18100	HBI05_21755	HBI04_17380	HBI02_09400	HBI03_11175	PS148-R_02840	PS15001_14910	PS15002_03665	PS16001_02870	PS16002_15275	PS16003_06190	PS16004_02655	PS16005_14825	PS184-R_07610	PS310-R_07590	PS378-R_02840	PS57-R_04890	RL316_15160	RL320_13020	RL97_05590	SA17021_13165	SA17022_02210	SA17023_09405	SA17024_14690	SA17101_03935	SB17032_24065	SB17033_18655	SB17034_18545	SB17035_21760	SB17036_03000	SB17037_06745	SB17038_05710	SB17039_03155	SB17040_02250	SB17042_07970
ycfH		metal-dependent hydrolase	46	46	1	99	631				797	797	797	2E151-R_03725	HBI01_23540	HBI05_14890	HBI04_12135	HBI02_18020	HBI03_02295	PS148-R_05485	PS15001_22160	PS15002_01360	PS16001_11955	PS16002_09835	PS16003_15945	PS16004_19515	PS16005_21385	PS184-R_06450	PS310-R_06755	PS378-R_04005	PS57-R_02225	RL316_24220	RL320_22945	RL97_06910	SA17021_13890	SA17022_08510	SA17023_02260	SA17024_17090	SA17101_02920	SB17032_04530	SB17033_02540	SB17034_19100	SB17035_05275	SB17036_17640	SB17037_02620	SB17038_12340	SB17039_04120	SB17040_18740	SB17042_09840
lipoprotein		lipoprotein	46	46	1	99	9609				413	413	413	2E151-R_09595	HBI01_01295	HBI05_08375	HBI04_07450	HBI02_19095	HBI03_07810	PS148-R_09365	PS15001_03445	PS15002_16125	PS16001_07500	PS16002_20320	PS16003_21105	PS16004_16200	PS16005_21045	PS184-R_01790	PS310-R_00935	PS378-R_06635	PS57-R_12090	RL316_11950	RL320_08450	RL97_17955	SA17021_08875	SA17022_21590	SA17023_19870	SA17024_12545	SA17101_00025	SB17032_23780	SB17033_17965	SB17034_04850	SB17035_04115	SB17036_20345	SB17037_02145	SB17038_19330	SB17039_17355	SB17040_13615	SB17042_13845
mgtA		magnesium-translocating P-type ATPase	46	46	1	99	6545				2696	2696	2696	2E151-R_12850	HBI01_02230	HBI05_02850	HBI04_09975	HBI02_04750	HBI03_11975	PS148-R_12745	PS15001_17910	PS15002_05360	PS16001_20235	PS16002_04920	PS16003_22455	PS16004_08820	PS16005_15815	PS184-R_12420	PS310-R_13995	PS378-R_13025	PS57-R_10965	RL316_09175	RL320_02555	RL97_15260	SA17021_05840	SA17022_10690	SA17023_13600	SA17024_23135	SA17101_24270	SB17032_08510	SB17033_10520	SB17034_08415	SB17035_00680	SB17036_24805	SB17037_04855	SB17038_14070	SB17039_06800	SB17040_06820	SB17042_19000
dapD		2,3,4,5-tetrahydropyridine-2,6-dicarboxylate N-succinyltransferase	46	46	1	99	8773				824	824	824	2E151-R_11255	HBI01_24105	HBI05_01665	HBI04_17885	HBI02_03505	HBI03_17120	PS148-R_08245	PS15001_07470	PS15002_25795	PS16001_12410	PS16002_23050	PS16003_11920	PS16004_23090	PS16005_24830	PS184-R_10825	PS310-R_11125	PS378-R_09370	PS57-R_07155	RL316_06765	RL320_04830	RL97_04910	SA17021_21895	SA17022_26340	SA17023_11740	SA17024_21095	SA17101_13360	SB17032_27175	SB17033_00190	SB17034_00720	SB17035_14425	SB17036_10995	SB17037_10740	SB17038_17635	SB17039_20005	SB17040_23675	SB17042_02120
gpt		xanthine phosphoribosyltransferase	46	46	1	99	3660				458	458	458	2E151-R_22955	HBI01_19020	HBI05_18540	HBI04_10410	HBI02_09905	HBI03_03920	PS148-R_22890	PS15001_17440	PS15002_19495	PS16001_10730	PS16002_07285	PS16003_18900	PS16004_20955	PS16005_17950	PS184-R_23055	PS310-R_23280	PS378-R_23420	PS57-R_23000	RL316_04325	RL320_03480	RL97_20325	SA17021_23855	SA17022_22730	SA17023_21780	SA17024_06555	SA17101_15415	SB17032_05925	SB17033_22550	SB17034_06060	SB17035_23035	SB17036_00140	SB17037_11065	SB17038_11740	SB17039_05500	SB17040_26115	SB17042_23520
envC		murein hydrolase activator EnvC	46	46	1	99	6659				1259	1259	1259	2E151-R_07730	HBI01_10080	HBI05_10095	HBI04_20380	HBI02_13155	HBI03_21050	PS148-R_06190	PS15001_05500	PS15002_06445	PS16001_00915	PS16002_00790	PS16003_03970	PS16004_05245	PS16005_00515	PS184-R_09165	PS310-R_09470	PS378-R_08665	PS57-R_06055	RL316_02945	RL320_09550	RL97_14620	SA17021_14960	SA17022_00400	SA17023_15290	SA17024_04475	SA17101_08495	SB17032_18665	SB17033_01625	SB17034_02300	SB17035_05980	SB17036_00695	SB17037_21135	SB17038_21650	SB17039_01985	SB17040_04910	SB17042_19455
fucR		L-fucose operon activator	46	46	1	99	7714				731	731	731	2E151-R_16630	HBI01_09220	HBI05_20900	HBI04_20995	HBI02_26850	HBI03_24435	PS148-R_15765	PS15001_06310	PS15002_00125	PS16001_01920	PS16002_17870	PS16003_18215	PS16004_20150	PS16005_07095	PS184-R_15610	PS310-R_18405	PS378-R_15895	PS57-R_15205	RL316_18600	RL320_21140	RL97_15040	SA17021_19990	SA17022_07930	SA17023_16210	SA17024_24790	SA17101_06810	SB17032_01430	SB17033_13805	SB17034_15460	SB17035_19175	SB17036_05900	SB17037_19315	SB17038_10660	SB17039_06215	SB17040_10970	SB17042_12895
oppA		oligopeptide ABC transporter substrate-binding protein OppA	46	46	1	99	6104				1676	1676	1676	2E151-R_16755	HBI01_08175	HBI05_25340	HBI04_25275	HBI02_02835	HBI03_12285	PS148-R_16475	PS15001_04560	PS15002_18770	PS16001_25490	PS16002_08825	PS16003_17075	PS16004_12390	PS16005_04775	PS184-R_16320	PS310-R_19040	PS378-R_16535	PS57-R_15915	RL316_13385	RL320_25330	RL97_21530	SA17021_25005	SA17022_18220	SA17023_02935	SA17024_20380	SA17101_19465	SB17032_12120	SB17033_07040	SB17034_10770	SB17035_16700	SB17036_09890	SB17037_18780	SB17038_00660	SB17039_25025	SB17040_03745	SB17042_24260
yafJ		Putative glutamine amidotransferase YafJ	46	46	1	99	3634				767	767	767	2E151-R_22895	HBI01_19080	HBI05_06755	HBI04_10485	HBI02_01260	HBI03_03855	PS148-R_22950	PS15001_17380	PS15002_19555	PS16001_10790	PS16002_07345	PS16003_18960	PS16004_20895	PS16005_17890	PS184-R_22995	PS310-R_23220	PS378-R_23360	PS57-R_23060	RL316_04385	RL320_03540	RL97_20385	SA17021_23915	SA17022_22670	SA17023_21720	SA17024_06495	SA17101_15485	SB17032_06005	SB17033_22610	SB17034_06000	SB17035_23095	SB17036_00080	SB17037_11005	SB17038_11800	SB17039_05560	SB17040_26055	SB17042_25710
purN		phosphoribosylglycinamide formyltransferase	46	46	1	99	374				638	638	638	2E151-R_14585	HBI01_25335	HBI05_11830	HBI04_08450	HBI02_08075	HBI03_21080	PS148-R_14820	PS15001_13540	PS15002_08660	PS16001_04240	PS16002_06940	PS16003_07565	PS16004_01455	PS16005_10015	PS184-R_14665	PS310-R_11700	PS378-R_10900	PS57-R_13745	RL316_09915	RL320_26290	RL97_11215	SA17021_03840	SA17022_03580	SA17023_22070	SA17024_17415	SA17101_05415	SB17032_15270	SB17033_08035	SB17034_11860	SB17035_20385	SB17036_14420	SB17037_05370	SB17038_07080	SB17039_08905	SB17040_00880	SB17042_00515
prmB		50S ribosomal protein L3 N(5)-glutamine methyltransferase	46	46	1	99	553				932	932	932	2E151-R_05245	HBI01_11025	HBI05_05535	HBI04_14785	HBI02_25915	HBI03_16845	PS148-R_03525	PS15001_14225	PS15002_02980	PS16001_03555	PS16002_12040	PS16003_06875	PS16004_01570	PS16005_14355	PS184-R_06925	PS310-R_08275	PS378-R_03525	PS57-R_04205	RL316_14475	RL320_08815	RL97_22195	SA17021_13455	SA17022_02895	SA17023_10090	SA17024_18070	SA17101_04565	SB17032_14265	SB17033_06630	SB17034_12550	SB17035_21075	SB17036_15105	SB17037_06060	SB17038_06395	SB17039_09885	SB17040_01565	SB17042_01285
cysE		serine O-acetyltransferase	46	46	1	99	7217				821	821	821	2E151-R_07700	HBI01_10110	HBI05_10065	HBI04_20410	HBI02_13125	HBI03_21020	PS148-R_06160	PS15001_05470	PS15002_06475	PS16001_00945	PS16002_00760	PS16003_04000	PS16004_05275	PS16005_00485	PS184-R_09195	PS310-R_09500	PS378-R_08695	PS57-R_06025	RL316_02915	RL320_09580	RL97_14590	SA17021_14990	SA17022_00370	SA17023_15260	SA17024_04505	SA17101_08525	SB17032_18695	SB17033_01595	SB17034_02330	SB17035_05950	SB17036_00665	SB17037_21105	SB17038_21680	SB17039_02015	SB17040_04880	SB17042_19485
ubiB		ubiquinone biosynthesis regulatory protein kinase UbiB	46	46	1	99	4355				1640	1640	1640	2E151-R_18100	HBI01_22865	HBI05_20450	HBI04_00785	HBI02_20005	HBI03_13665	PS148-R_18465	PS15001_24215	PS15002_23570	PS16001_24615	PS16002_24255	PS16003_26490	PS16004_22065	PS16005_26095	PS184-R_18310	PS310-R_20295	PS378-R_19110	PS57-R_17910	RL316_08430	RL320_08935	RL97_11420	SA17021_26365	SA17022_13635	SA17023_22755	SA17024_13350	SA17101_09720	SB17032_00435	SB17033_20225	SB17034_22380	SB17035_25720	SB17036_16635	SB17037_23025	SB17038_15320	SB17039_14515	SB17040_12185	SB17042_17275
fadE		acyl-CoA dehydrogenase FadE	46	46	1	99	3632				2444	2444	2444	2E151-R_22880	HBI01_19095	HBI05_06740	HBI04_10500	HBI02_01245	HBI03_03840	PS148-R_22965	PS15001_17365	PS15002_19570	PS16001_10805	PS16002_07360	PS16003_18975	PS16004_20880	PS16005_17875	PS184-R_22980	PS310-R_23205	PS378-R_23345	PS57-R_23075	RL316_04400	RL320_03555	RL97_20400	SA17021_23930	SA17022_22655	SA17023_21705	SA17024_06480	SA17101_15500	SB17032_06020	SB17033_22625	SB17034_05985	SB17035_23110	SB17036_00065	SB17037_10990	SB17038_11815	SB17039_05575	SB17040_26040	SB17042_25695
mdtG		multidrug efflux MFS transporter MdtG	46	46	1	99	680				1226	1226	1226	2E151-R_03490	HBI01_23775	HBI05_14645	HBI04_23420	HBI02_21325	HBI03_23090	PS148-R_05250	PS15001_22395	PS15002_01595	PS16001_17835	PS16002_10070	PS16003_12390	PS16004_19750	PS16005_18590	PS184-R_06215	PS310-R_06520	PS378-R_04240	PS57-R_02460	RL316_24455	RL320_23180	RL97_06675	SA17021_00155	SA17022_08745	SA17023_02025	SA17024_16850	SA17101_02685	SB17032_04295	SB17033_02775	SB17034_19335	SB17035_05040	SB17036_10045	SB17037_02855	SB17038_12575	SB17039_23495	SB17040_18975	SB17042_09605
tyrA		bifunctional chorismate mutase/prephenate dehydrogenase	46	46	1	99	7843				1121	1121	1121	2E151-R_21685	HBI01_02730	HBI05_12965	HBI04_00250	HBI02_14360	HBI03_00110	PS148-R_21875	PS15001_10700	PS15002_17615	PS16001_26245	PS16002_07705	PS16003_24160	PS16004_10980	PS16005_03200	PS184-R_22025	PS310-R_22410	PS378-R_22150	PS57-R_21985	RL316_17675	RL320_05905	RL97_16455	SA17021_11240	SA17022_14645	SA17023_14280	SA17024_06375	SA17101_05885	SB17032_03220	SB17033_12880	SB17034_17870	SB17035_23185	SB17036_13500	SB17037_13780	SB17038_14310	SB17039_21110	SB17040_16845	SB17042_23605
dppB		dipeptide ABC transporter permease DppB	46	46	1	99	7114				1019	1019	1019	2E151-R_07350	HBI01_20795	HBI05_05070	HBI04_06245	HBI02_20490	HBI03_19510	PS148-R_05810	PS15001_12760	PS15002_11440	PS16001_01295	PS16002_00410	PS16003_04350	PS16004_05620	PS16005_00140	PS184-R_09545	PS310-R_09850	PS378-R_09045	PS57-R_05675	RL316_02565	RL320_09930	RL97_23815	SA17021_15335	SA17022_17235	SA17023_14910	SA17024_04855	SA17101_26030	SB17032_19075	SB17033_01245	SB17034_02680	SB17035_05600	SB17036_00315	SB17037_20760	SB17038_22030	SB17039_02365	SB17040_04530	SB17042_03795
yjfF		sugar ABC transporter permease YjfF	46	46	1	99	6557				995	995	995	2E151-R_12785	HBI01_02295	HBI05_02915	HBI04_10045	HBI02_04815	HBI03_12040	PS148-R_12810	PS15001_17845	PS15002_05425	PS16001_20300	PS16002_04855	PS16003_22520	PS16004_08885	PS16005_15750	PS184-R_12355	PS310-R_14060	PS378-R_12960	PS57-R_10900	RL316_09110	RL320_02490	RL97_15325	SA17021_05905	SA17022_10755	SA17023_13665	SA17024_23200	SA17101_24205	SB17032_08445	SB17033_10585	SB17034_08350	SB17035_00615	SB17036_24740	SB17037_04790	SB17038_14005	SB17039_06865	SB17040_06885	SB17042_19065
aegA		formate-dependent uric acid utilization protein AegA	46	46	1	99	412				1979	1979	1979	2E151-R_14470	HBI01_25450	HBI05_12000	HBI04_16915	HBI02_08245	HBI03_20660	PS148-R_14935	PS15001_13655	PS15002_08545	PS16001_04125	PS16002_07055	PS16003_07450	PS16004_01340	PS16005_10130	PS184-R_14780	PS310-R_11585	PS378-R_10785	PS57-R_13630	RL316_10030	RL320_26405	RL97_13365	SA17021_03955	SA17022_03465	SA17023_21955	SA17024_17530	SA17101_05210	SB17032_15090	SB17033_08150	SB17034_11975	SB17035_20500	SB17036_14535	SB17037_05485	SB17038_06965	SB17039_08790	SB17040_00995	SB17042_00700
nikB		nickel ABC transporter permease subunit NikB	46	46	1	99	7016				944	944	944	2E151-R_13720	HBI01_04070	HBI05_18205	HBI04_22375	HBI02_06815	HBI03_11600	PS148-R_13840	PS15001_02755	PS15002_23210	PS16001_14370	PS16002_18325	PS16003_12780	PS16004_18795	PS16005_05885	PS184-R_13285	PS310-R_15085	PS378-R_14300	PS57-R_12880	RL316_20210	RL320_14075	RL97_00685	SA17021_15745	SA17022_16830	SA17023_08370	SA17024_05175	SA17101_26425	SB17032_19550	SB17033_11535	SB17034_25675	SB17035_02805	SB17036_23390	SB17037_24850	SB17038_18115	SB17039_12090	SB17040_25070	SB17042_04265
ddlA		D-alanine--D-alanine ligase	46	46	1	99	1923				1094	1094	1094	2E151-R_11840	HBI01_24525	HBI05_09225	HBI04_19730	HBI02_18355	HBI03_18630	PS148-R_11560	PS15001_01180	PS15002_04695	PS16001_06390	PS16002_02285	PS16003_10195	PS16004_00835	PS16005_16760	PS184-R_11410	PS310-R_12810	PS378-R_12200	PS57-R_09955	RL316_01020	RL320_11330	RL97_19595	SA17021_05065	SA17022_23090	SA17023_11005	SA17024_07265	SA17101_14010	SB17032_02760	SB17033_09970	SB17034_09195	SB17035_01275	SB17036_06860	SB17037_24185	SB17038_25815	SB17039_11650	SB17040_17610	SB17042_15055
tcyJ		cystine ABC transporter substrate-binding protein	46	46	1	99	9601				857	857	857	2E151-R_09635	HBI01_01255	HBI05_08415	HBI04_07410	HBI02_19055	HBI03_07770	PS148-R_09405	PS15001_03485	PS15002_16165	PS16001_07460	PS16002_20360	PS16003_21065	PS16004_16240	PS16005_21005	PS184-R_01750	PS310-R_00975	PS378-R_06675	PS57-R_12130	RL316_11990	RL320_08490	RL97_17915	SA17021_08835	SA17022_21550	SA17023_19830	SA17024_12505	SA17101_00065	SB17032_23820	SB17033_17925	SB17034_04810	SB17035_04075	SB17036_20385	SB17037_02185	SB17038_19370	SB17039_17315	SB17040_13655	SB17042_13805
caiF		carnitine metabolism transcriptional regulator CaiF	46	46	1	99	8946				395	395	395	2E151-R_10505	HBI01_16780	HBI05_11485	HBI04_04795	HBI02_18790	HBI03_18560	PS148-R_07495	PS15001_20825	PS15002_25045	PS16001_13160	PS16002_23790	PS16003_11170	PS16004_23840	PS16005_24080	PS184-R_10075	PS310-R_10375	PS378-R_10120	PS57-R_07905	RL316_06015	RL320_04080	RL97_18330	SA17021_21135	SA17022_25590	SA17023_23590	SA17024_21845	SA17101_12680	SB17032_27895	SB17033_00940	SB17034_03845	SB17035_13675	SB17036_11750	SB17037_00745	SB17038_16880	SB17039_19255	SB17040_22925	SB17042_02840
rbsC		ribose ABC transporter permease	46	46	1	99	4664				965	965	965	2E151-R_08615	HBI01_10005	HBI05_22295	HBI04_23355	HBI02_17020	HBI03_10360	PS148-R_07075	PS15001_11075	PS15002_15175	PS16001_00030	PS16002_01675	PS16003_23975	PS16004_09395	PS16005_01885	PS184-R_08280	PS310-R_08585	PS378-R_07780	PS57-R_06940	RL316_01445	RL320_07270	RL97_08065	SA17021_14075	SA17022_01285	SA17023_05150	SA17024_03590	SA17101_00845	SB17032_12670	SB17033_02510	SB17034_13290	SB17035_10240	SB17036_01580	SB17037_22020	SB17038_11590	SB17039_01100	SB17040_05795	SB17042_15655
btuF		vitamin B12 ABC transporter substrate-binding protein BtuF	46	46	1	99	8779				800	800	800	2E151-R_11225	HBI01_24075	HBI05_01635	HBI04_17915	HBI02_03475	HBI03_17090	PS148-R_08215	PS15001_07500	PS15002_25765	PS16001_12440	PS16002_23080	PS16003_11890	PS16004_23120	PS16005_24800	PS184-R_10795	PS310-R_11095	PS378-R_09400	PS57-R_07185	RL316_06735	RL320_04800	RL97_04880	SA17021_21865	SA17022_26310	SA17023_11770	SA17024_21125	SA17101_13330	SB17032_27205	SB17033_00220	SB17034_00690	SB17035_14395	SB17036_11025	SB17037_10710	SB17038_17605	SB17039_19975	SB17040_23645	SB17042_02150
fabA		bifunctional 3-hydroxydecanoyl-ACP dehydratase/trans-2-decenoyl-ACP isomerase	46	46	1	99	790				626	626	626	2E151-R_03045	HBI01_01690	HBI05_14220	HBI04_25000	HBI02_15275	HBI03_21390	PS148-R_04805	PS15001_22840	PS15002_02040	PS16001_18275	PS16002_10515	PS16003_15255	PS16004_14435	PS16005_19035	PS184-R_05770	PS310-R_06075	PS378-R_04685	PS57-R_02905	RL316_16490	RL320_14515	RL97_06230	SA17021_00525	SA17022_09190	SA17023_01580	SA17024_16405	SA17101_02235	SB17032_21665	SB17033_03220	SB17034_19780	SB17035_04595	SB17036_10490	SB17037_03300	SB17038_13020	SB17039_23050	SB17040_19420	SB17042_15345
frc		formyl-CoA transferase	46	46	1	99	490				1250	1250	1250	2E151-R_05410	HBI01_05730	HBI05_05695	HBI04_16500	HBI02_08670	HBI03_16970	PS148-R_03690	PS15001_14060	PS15002_08140	PS16001_03720	PS16002_06380	PS16003_07040	PS16004_00935	PS16005_10535	PS184-R_06760	PS310-R_08440	PS378-R_03690	PS57-R_04040	RL316_10435	RL320_26810	RL97_12960	SA17021_04360	SA17022_03060	SA17023_10255	SA17024_18235	SA17101_04785	SB17032_14425	SB17033_06465	SB17034_12380	SB17035_20905	SB17036_14940	SB17037_05890	SB17038_06560	SB17039_09720	SB17040_01400	SB17042_01125
adeP		adenine permease AdeP	46	46	1	99	4704				1337	1337	1337	2E151-R_08425	HBI01_09815	HBI05_09015	HBI04_02355	HBI02_15555	HBI03_14815	PS148-R_06885	PS15001_11265	PS15002_15365	PS16001_00220	PS16002_01485	PS16003_03275	PS16004_08080	PS16005_01695	PS184-R_08470	PS310-R_08775	PS378-R_07970	PS57-R_06750	RL316_01635	RL320_07460	RL97_07875	SA17021_14265	SA17022_01095	SA17023_04960	SA17024_03780	SA17101_01055	SB17032_10455	SB17033_02320	SB17034_13480	SB17035_10430	SB17036_01390	SB17037_21830	SB17038_11400	SB17039_01290	SB17040_05605	SB17042_15840
cydD		cysteine/glutathione ABC transporter permease/ATP-binding protein CydD	46	46	1	99	10053				1766	1766	1766	2E151-R_02755	HBI01_13340	HBI05_04755	HBI04_05285	HBI02_10505	HBI03_24570	PS148-R_04515	PS15001_23130	PS15002_02330	PS16001_05405	PS16002_10805	PS16003_14965	PS16004_14725	PS16005_02005	PS184-R_05480	PS310-R_05785	PS378-R_04975	PS57-R_03195	RL316_16780	RL320_14805	RL97_09385	SA17021_00815	SA17022_09480	SA17023_00590	SA17024_16115	SA17101_01885	SB17032_21060	SB17033_03510	SB17034_20070	SB17035_17420	SB17036_10780	SB17037_03590	SB17038_13310	SB17039_22760	SB17040_19710	SB17042_18575
xylG		D-xylose ABC transporter ATP-binding protein	46	46	1	99	7149				1541	1541	1541	2E151-R_07490	HBI01_06405	HBI05_16180	HBI04_03690	HBI02_16220	HBI03_08150	PS148-R_05950	PS15001_05260	PS15002_06685	PS16001_01155	PS16002_00550	PS16003_04210	PS16004_05485	PS16005_00275	PS184-R_09405	PS310-R_09710	PS378-R_08905	PS57-R_05815	RL316_02705	RL320_09790	RL97_23955	SA17021_15200	SA17022_00160	SA17023_15050	SA17024_04715	SA17101_13670	SB17032_18915	SB17033_01385	SB17034_02540	SB17035_05740	SB17036_00455	SB17037_20895	SB17038_21890	SB17039_02225	SB17040_04670	SB17042_03635
argG		argininosuccinate synthase	46	46	1	99	9087				1343	1343	1343	2E151-R_01540	HBI01_07160	HBI05_13450	HBI04_01820	HBI02_24455	HBI03_13095	PS148-R_00500	PS15001_06990	PS15002_22025	PS16001_10100	PS16002_25930	PS16003_02150	PS16004_03835	PS16005_08655	PS184-R_03235	PS310-R_04575	PS378-R_00500	PS57-R_00500	RL316_26380	RL320_24025	RL97_17250	SA17021_09550	SA17022_06025	SA17023_06335	SA17024_09385	SA17101_11265	SB17032_16795	SB17033_23245	SB17034_06235	SB17035_24270	SB17036_16420	SB17037_16570	SB17038_01815	SB17039_04865	SB17040_08000	SB17042_05515
acrA		multidrug efflux RND transporter periplasmic adaptor subunit AcrA	46	46	1	99	2011				1193	1193	1193	2E151-R_12260	HBI01_14340	HBI05_12755	HBI04_08255	HBI02_26200	HBI03_22605	PS148-R_11980	PS15001_01600	PS15002_04275	PS16001_06810	PS16002_01865	PS16003_10615	PS16004_00415	PS16005_17180	PS184-R_11830	PS310-R_13230	PS378-R_11780	PS57-R_10375	RL316_00600	RL320_10910	RL97_13840	SA17021_04645	SA17022_23510	SA17023_12020	SA17024_07685	SA17101_14440	SB17032_12830	SB17033_09550	SB17034_08775	SB17035_08275	SB17036_06440	SB17037_23765	SB17038_25395	SB17039_11230	SB17040_00245	SB17042_14620
valS		valine--tRNA ligase	46	46	1	99	6532				2855	2855	2855	2E151-R_12920	HBI01_02160	HBI05_02785	HBI04_08690	HBI02_00815	HBI03_03945	PS148-R_12675	PS15001_17980	PS15002_05290	PS16001_20165	PS16002_04990	PS16003_22385	PS16004_08750	PS16005_15885	PS184-R_12490	PS310-R_13925	PS378-R_13095	PS57-R_11035	RL316_09245	RL320_02625	RL97_15190	SA17021_05770	SA17022_10620	SA17023_13530	SA17024_23065	SA17101_24335	SB17032_08575	SB17033_10450	SB17034_08485	SB17035_00750	SB17036_24875	SB17037_04925	SB17038_14140	SB17039_06730	SB17040_06750	SB17042_18930
tdcC		threonine/serine transporter TdcC	46	46	1	99	9144				1331	1331	1331	2E151-R_01275	HBI01_06895	HBI05_22850	HBI04_24480	HBI02_11270	HBI03_15520	PS148-R_00765	PS15001_06725	PS15002_21760	PS16001_09835	PS16002_25665	PS16003_01885	PS16004_03570	PS16005_08390	PS184-R_03500	PS310-R_04310	PS378-R_00765	PS57-R_00765	RL316_26115	RL320_24290	RL97_16985	SA17021_09815	SA17022_05760	SA17023_06070	SA17024_09120	SA17101_10970	SB17032_17095	SB17033_23510	SB17034_06500	SB17035_24005	SB17036_18605	SB17037_16305	SB17038_02080	SB17039_04600	SB17040_08265	SB17042_05810
aldB		aldehyde dehydrogenase AldB	46	46	1	99	7176				1538	1538	1538	2E151-R_07605	HBI01_06520	HBI05_16295	HBI04_13665	HBI02_16335	HBI03_19635	PS148-R_06065	PS15001_05375	PS15002_06570	PS16001_01040	PS16002_00665	PS16003_04095	PS16004_05370	PS16005_00390	PS184-R_09290	PS310-R_09595	PS378-R_08790	PS57-R_05930	RL316_02820	RL320_09675	RL97_24070	SA17021_15085	SA17022_00275	SA17023_15165	SA17024_04600	SA17101_13790	SB17032_18825	SB17033_01500	SB17034_02425	SB17035_05855	SB17036_00570	SB17037_21010	SB17038_21775	SB17039_02110	SB17040_04785	SB17042_03550
osmE		osmotically-inducible lipoprotein OsmE	46	46	1	99	9390				338	338	338	2E151-R_05960	HBI01_19465	HBI05_23640	HBI04_12695	HBI02_21695	HBI03_00440	PS148-R_10320	PS15001_24965	PS15002_07260	PS16001_21740	PS16002_21285	PS16003_25100	PS16004_26040	PS16005_19830	PS184-R_00825	PS310-R_01900	PS378-R_07600	PS57-R_09120	RL316_21815	RL320_00470	RL97_03900	SA17021_07910	SA17022_20625	SA17023_18910	SA17024_11580	SA17101_21910	SB17032_20390	SB17033_25490	SB17034_03885	SB17035_14955	SB17036_18950	SB17037_07680	SB17038_07745	SB17039_16390	SB17040_14585	SB17042_10750
seqA		replication initiation negative regulator SeqA	46	46	1	99	1595				545	545	545	2E151-R_19845	HBI01_12015	HBI05_01900	HBI04_20300	HBI02_13980	HBI03_00250	PS148-R_20190	PS15001_08475	PS15002_10030	PS16001_16995	PS16002_17475	PS16003_09215	PS16004_15155	PS16005_11195	PS184-R_20050	PS310-R_21505	PS378-R_20310	PS57-R_19490	RL316_08075	RL320_22365	RL97_09820	SA17021_01890	SA17022_06915	SA17023_12900	SA17024_01495	SA17101_23680	SB17032_17525	SB17033_05350	SB17034_21035	SB17035_07275	SB17036_02495	SB17037_11855	SB17038_03315	SB17039_10325	SB17040_20675	SB17042_07065
ybiW		putative dehydratase YbiW	46	46	1	99	9979				2432	2432	2432	2E151-R_02425	HBI01_13010	HBI05_07355	HBI04_26205	HBI02_23835	HBI03_03340	PS148-R_04185	PS15001_23460	PS15002_02660	PS16001_05735	PS16002_11135	PS16003_14635	PS16004_15055	PS16005_19485	PS184-R_05150	PS310-R_05455	PS378-R_05305	PS57-R_03525	RL316_17110	RL320_15135	RL97_09055	SA17021_01145	SA17022_09810	SA17023_00260	SA17024_00860	SA17101_01545	SB17032_06630	SB17033_04715	SB17034_20400	SB17035_06640	SB17036_04285	SB17037_03920	SB17038_02680	SB17039_22430	SB17040_20040	SB17042_07790
clsB		cardiolipin synthase ClsB	46	46	1	99	9939				1241	1241	1241	2E151-R_02250	HBI01_12835	HBI05_07560	HBI04_26380	HBI02_24045	HBI03_09350	PS148-R_04010	PS15001_23635	PS15002_02835	PS16001_05910	PS16002_11310	PS16003_14460	PS16004_19190	PS16005_17490	PS184-R_04975	PS310-R_05280	PS378-R_05480	PS57-R_03700	RL316_17285	RL320_15310	RL97_08880	SA17021_01320	SA17022_09985	SA17023_00085	SA17024_01035	SA17101_20545	SB17032_06435	SB17033_04890	SB17034_20575	SB17035_06815	SB17036_04110	SB17037_04095	SB17038_02855	SB17039_22255	SB17040_20215	SB17042_07595
yigB		5-amino-6-(5-phospho-D-ribitylamino)uracil phosphatase YigB	46	46	1	99	4439				716	716	716	2E151-R_18315	HBI01_20935	HBI05_20325	HBI04_13475	HBI02_19880	HBI03_10095	PS148-R_18680	PS15001_24005	PS15002_16955	PS16001_15710	PS16002_24475	PS16003_02750	PS16004_22285	PS16005_00780	PS184-R_18525	PS310-R_20080	PS378-R_18900	PS57-R_18120	RL316_11085	RL320_01105	RL97_00095	SA17021_23560	SA17022_13420	SA17023_22530	SA17024_13565	SA17101_09600	SB17032_00555	SB17033_25160	SB17034_22165	SB17035_25935	SB17036_16850	SB17037_23240	SB17038_15535	SB17039_14730	SB17040_12395	SB17042_17395
Alkyl hydroperoxide reductase subunit F		Alkyl hydroperoxide reductase subunit F	46	46	1	99	1510				1595	1595	1595	2E151-R_17755	HBI01_21300	HBI05_02280	HBI04_04165	HBI02_01770	HBI03_12380	PS148-R_17335	PS15001_08900	PS15002_10455	PS16001_16185	PS16002_05905	PS16003_13520	PS16004_15910	PS16005_14990	PS184-R_17180	PS310-R_19525	PS378-R_17020	PS57-R_16915	RL316_07650	RL320_21940	RL97_10245	SA17021_02315	SA17022_07340	SA17023_13325	SA17024_01920	SA17101_23285	SB17032_17910	SB17033_05775	SB17034_21460	SB17035_07700	SB17036_02070	SB17037_12280	SB17038_03740	SB17039_10750	SB17040_21090	SB17042_06680
group_10249	lptB	LPS export ABC transporter ATP-binding protein	46	46	1	99	9944				1736	1736	1736	2E151-R_02275	HBI01_12860	HBI05_07535	HBI04_26355	HBI02_24020	HBI03_09325	PS148-R_04035	PS15001_23610	PS15002_02810	PS16001_05885	PS16002_11285	PS16003_14485	PS16004_19165	PS16005_17465	PS184-R_05000	PS310-R_05305	PS378-R_05455	PS57-R_03675	RL316_17260	RL320_15285	RL97_08905	SA17021_01295	SA17022_09960	SA17023_00110	SA17024_01010	SA17101_20570	SB17032_06460	SB17033_04865	SB17034_20550	SB17035_06790	SB17036_04135	SB17037_04070	SB17038_02830	SB17039_22280	SB17040_20190	SB17042_07620
galP		galactose/proton symporter	46	46	1	99	7500				1394	1394	1394	2E151-R_24465	HBI01_07750	HBI05_24540	HBI04_03445	HBI02_21215	HBI03_03055	PS148-R_24205	PS15001_00640	PS15002_14580	PS16001_23745	PS16002_04110	PS16003_08720	PS16004_07570	PS16005_09310	PS184-R_24875	PS310-R_24435	PS378-R_24580	PS57-R_24550	RL316_19390	RL320_20345	RL97_24745	SA17021_12130	SA17022_12155	SA17023_04175	SA17024_24005	SA17101_07625	SB17032_10350	SB17033_14595	SB17034_16250	SB17035_18390	SB17036_05110	SB17037_13025	SB17038_09890	SB17039_04410	SB17040_10185	SB17042_23025
ybhP		Uncharacterized protein YbhP	46	46	1	99	9940				761	761	761	2E151-R_02255	HBI01_12840	HBI05_07555	HBI04_26375	HBI02_24040	HBI03_09345	PS148-R_04015	PS15001_23630	PS15002_02830	PS16001_05905	PS16002_11305	PS16003_14465	PS16004_19185	PS16005_17485	PS184-R_04980	PS310-R_05285	PS378-R_05475	PS57-R_03695	RL316_17280	RL320_15305	RL97_08885	SA17021_01315	SA17022_09980	SA17023_00090	SA17024_01030	SA17101_20550	SB17032_06440	SB17033_04885	SB17034_20570	SB17035_06810	SB17036_04115	SB17037_04090	SB17038_02850	SB17039_22260	SB17040_20210	SB17042_07600
livF		high-affinity branched-chain amino acid ABC transporter ATP-binding protein LivF	46	46	1	99	6975				713	713	713	2E151-R_13845	HBI01_03945	HBI05_18415	HBI04_13180	HBI02_07025	HBI03_14695	PS148-R_13715	PS15001_02880	PS15002_23085	PS16001_14245	PS16002_18450	PS16003_12905	PS16004_18920	PS16005_06010	PS184-R_13410	PS310-R_14960	PS378-R_14175	PS57-R_13005	RL316_20085	RL320_13950	RL97_00560	SA17021_15870	SA17022_16705	SA17023_08245	SA17024_05300	SA17101_26550	SB17032_03475	SB17033_11410	SB17034_25800	SB17035_02930	SB17036_23515	SB17037_24975	SB17038_18240	SB17039_13855	SB17040_25195	SB17042_04480
mpl		UDP-N-acetylmuramate:L-alanyl-gamma-D-glutamyl-meso-diaminopimelate ligase	46	46	1	99	6555				1373	1373	1373	2E151-R_12795	HBI01_02285	HBI05_02905	HBI04_10035	HBI02_04805	HBI03_12030	PS148-R_12800	PS15001_17855	PS15002_05415	PS16001_20290	PS16002_04865	PS16003_22510	PS16004_08875	PS16005_15760	PS184-R_12365	PS310-R_14050	PS378-R_12970	PS57-R_10910	RL316_09120	RL320_02500	RL97_15315	SA17021_05895	SA17022_10745	SA17023_13655	SA17024_23190	SA17101_24215	SB17032_08455	SB17033_10575	SB17034_08360	SB17035_00625	SB17036_24750	SB17037_04800	SB17038_14015	SB17039_06855	SB17040_06875	SB17042_19055
pntA		Re/Si-specific NAD(P)(+) transhydrogenase subunit alpha	46	46	1	99	3077				1532	1532	1532	2E151-R_06915	HBI01_00580	HBI05_04140	HBI04_05845	HBI02_09170	HBI03_12835	PS148-R_19665	PS15001_25920	PS15002_09120	PS16001_22695	PS16002_22240	PS16003_26055	PS16004_12670	PS16005_05245	PS184-R_19690	PS310-R_02855	PS378-R_20055	PS57-R_18705	RL316_22770	RL320_16960	RL97_25615	SA17021_06660	SA17022_19665	SA17023_17950	SA17024_10625	SA17101_21195	SB17032_22700	SB17033_16785	SB17034_05395	SB17035_12065	SB17036_25140	SB17037_08655	SB17038_08705	SB17039_15435	SB17040_15550	SB17042_22860
fumB		class I fumarate hydratase	46	46	1	99	8237				1646	1646	1646	2E151-R_20730	HBI01_21785	HBI05_20065	HBI04_04185	HBI02_03830	HBI03_15135	PS148-R_20970	PS15001_02040	PS15002_11925	PS16001_08800	PS16002_03450	PS16003_05255	PS16004_17950	PS16005_12965	PS184-R_20830	PS310-R_22045	PS378-R_21195	PS57-R_20510	RL316_23155	RL320_06000	RL97_22270	SA17021_11315	SA17022_04820	SA17023_01490	SA17024_02795	SA17101_08310	SB17032_23520	SB17033_08250	SB17034_01725	SB17035_15170	SB17036_08440	SB17037_15045	SB17038_08980	SB17039_07500	SB17040_05855	SB17042_22020
iclR		glyoxylate bypass operon transcriptional repressor IclR	46	46	1	99	2490				824	824	824	2E151-R_24255	HBI01_22515	HBI05_00945	HBI04_13820	HBI02_00790	HBI03_12275	PS148-R_24150	PS15001_15885	PS15002_12345	PS16001_08070	PS16002_02720	PS16003_04525	PS16004_17085	PS16005_12235	PS184-R_24450	PS310-R_20970	PS378-R_24525	PS57-R_24125	RL316_23885	RL320_06735	RL97_23000	SA17021_12045	SA17022_04090	SA17023_00760	SA17024_03525	SA17101_07735	SB17032_10085	SB17033_08980	SB17034_00995	SB17035_16010	SB17036_07710	SB17037_14315	SB17038_09710	SB17039_08230	SB17040_06585	SB17042_18065
narU		nitrate/nitrite transporter NarU	46	46	1	99	3233				1388	1388	1388	2E151-R_25110	HBI01_12630	HBI05_06960	HBI04_12970	HBI02_01370	HBI03_18910	PS148-R_24970	PS15001_19225	PS15002_19710	PS16001_20955	PS16002_12805	PS16003_16560	PS16004_17020	PS16005_22695	PS184-R_25255	PS310-R_25030	PS378-R_25175	PS57-R_25025	RL316_04125	RL320_10670	RL97_12125	SA17021_22125	SA17022_19280	SA17023_26295	SA17024_18635	SA17101_25405	SB17032_25575	SB17033_22715	SB17034_05280	SB17035_10185	SB17036_18315	SB17037_17395	SB17038_15180	SB17039_08695	SB17040_18185	SB17042_25660
yhdW		Putative amino-acid ABC transporter-binding protein YhdW	46	46	1	99	8997				1025	1025	1025	2E151-R_02020	HBI01_07640	HBI05_13905	HBI04_13125	HBI02_25355	HBI03_15965	PS148-R_00020	PS15001_20135	PS15002_22505	PS16001_10580	PS16002_26410	PS16003_02630	PS16004_04315	PS16005_09135	PS184-R_02755	PS310-R_05055	PS378-R_00020	PS57-R_00020	RL316_26860	RL320_23545	RL97_17730	SA17021_09070	SA17022_06505	SA17023_17035	SA17024_09865	SA17101_11725	SB17032_16345	SB17033_22765	SB17034_09625	SB17035_24750	SB17036_15940	SB17037_17050	SB17038_01335	SB17039_05345	SB17040_07520	SB17042_05065
odhB		2-oxoglutarate dehydrogenase complex dihydrolipoyllysine-residue succinyltransferase	46	46	1	99	9867				1217	1217	1217	2E151-R_19985	HBI01_19940	HBI05_19340	HBI04_06045	HBI02_11295	HBI03_16180	PS148-R_20050	PS15001_08335	PS15002_09890	PS16001_16855	PS16002_09385	PS16003_09355	PS16004_21120	PS16005_11055	PS184-R_19910	PS310-R_21645	PS378-R_20450	PS57-R_19630	RL316_08215	RL320_22505	RL97_02405	SA17021_01750	SA17022_06660	SA17023_12760	SA17024_01355	SA17101_20225	SB17032_17360	SB17033_05210	SB17034_20895	SB17035_07135	SB17036_12965	SB17037_11715	SB17038_03175	SB17039_21935	SB17040_20535	SB17042_07230
ptsG		PTS glucose transporter subunit IIBC	46	46	1	99	630				1433	1433	1433	2E151-R_03730	HBI01_23535	HBI05_14895	HBI04_12130	HBI02_18015	HBI03_02290	PS148-R_05490	PS15001_22155	PS15002_01355	PS16001_11960	PS16002_09830	PS16003_15940	PS16004_19510	PS16005_21390	PS184-R_06455	PS310-R_06760	PS378-R_04000	PS57-R_02220	RL316_24215	RL320_22940	RL97_06915	SA17021_13885	SA17022_08505	SA17023_02265	SA17024_17095	SA17101_02925	SB17032_04535	SB17033_12250	SB17034_19095	SB17035_05280	SB17036_17645	SB17037_02615	SB17038_12335	SB17039_04115	SB17040_18735	SB17042_09845
leuB		3-isopropylmalate dehydrogenase	46	46	1	99	8899				1091	1091	1091	2E151-R_10735	HBI01_16550	HBI05_11280	HBI04_18360	HBI02_18590	HBI03_06420	PS148-R_07725	PS15001_12570	PS15002_25275	PS16001_12930	PS16002_23560	PS16003_11400	PS16004_23610	PS16005_24310	PS184-R_10305	PS310-R_10605	PS378-R_09890	PS57-R_07675	RL316_06245	RL320_04310	RL97_18560	SA17021_21365	SA17022_25820	SA17023_23360	SA17024_21615	SA17101_12880	SB17032_27680	SB17033_00710	SB17034_00200	SB17035_13905	SB17036_11520	SB17037_00975	SB17038_17115	SB17039_19485	SB17040_23155	SB17042_02625
atpG		F0F1 ATP synthase subunit gamma	46	46	1	99	4681				863	863	863	2E151-R_08530	HBI01_09920	HBI05_22210	HBI04_23270	HBI02_16935	HBI03_02580	PS148-R_06990	PS15001_11160	PS15002_15260	PS16001_00115	PS16002_01590	PS16003_24060	PS16004_09310	PS16005_01800	PS184-R_08365	PS310-R_08670	PS378-R_07865	PS57-R_06855	RL316_01530	RL320_07355	RL97_07980	SA17021_14160	SA17022_01200	SA17023_05065	SA17024_03675	SA17101_00930	SB17032_12755	SB17033_02425	SB17034_13375	SB17035_10325	SB17036_01495	SB17037_21935	SB17038_11505	SB17039_01185	SB17040_05710	SB17042_15740
cysI		assimilatory sulfite reductase (NADPH) hemoprotein subunit	46	46	1	99	8123				1712	1712	1712	2E151-R_16400	HBI01_08990	HBI05_20685	HBI04_19085	HBI02_17880	HBI03_18290	PS148-R_15995	PS15001_06080	PS15002_00355	PS16001_01690	PS16002_17640	PS16003_17985	PS16004_11555	PS16005_07325	PS184-R_15840	PS310-R_18175	PS378-R_15665	PS57-R_15435	RL316_18370	RL320_21370	RL97_14810	SA17021_19760	SA17022_08160	SA17023_15980	SA17024_25020	SA17101_06590	SB17032_01655	SB17033_13575	SB17034_15230	SB17035_19405	SB17036_06130	SB17037_19545	SB17038_10890	SB17039_06445	SB17040_11200	SB17042_13120
group_10264	nagA	N-acetylglucosamine-6-phosphate deacetylase	46	46	1	99	1574				1148	1148	1148	2E151-R_19745	HBI01_10525	HBI05_01955	HBI04_14140	HBI02_14035	HBI03_16220	PS148-R_20290	PS15001_08575	PS15002_10130	PS16001_17095	PS16002_17375	PS16003_09115	PS16004_15255	PS16005_17850	PS184-R_20150	PS310-R_21405	PS378-R_20210	PS57-R_19390	RL316_07975	RL320_22265	RL97_09920	SA17021_01990	SA17022_07015	SA17023_13000	SA17024_01595	SA17101_23620	SB17032_17580	SB17033_05450	SB17034_21135	SB17035_07375	SB17036_02395	SB17037_11955	SB17038_03415	SB17039_10425	SB17040_20775	SB17042_07010
guaB		IMP dehydrogenase	46	46	1	99	327				1466	1466	1466	2E151-R_14875	HBI01_20555	HBI05_06195	HBI04_02490	HBI02_01200	HBI03_23045	PS148-R_14530	PS15001_13495	PS15002_08705	PS16001_04285	PS16002_07775	PS16003_07610	PS16004_01500	PS16005_09970	PS184-R_14375	PS310-R_11990	PS378-R_11190	PS57-R_14035	RL316_09870	RL320_26245	RL97_11170	SA17021_03795	SA17022_03625	SA17023_20705	SA17024_02755	SA17101_05460	SB17032_15315	SB17033_07990	SB17034_11815	SB17035_20340	SB17036_04540	SB17037_05325	SB17038_07125	SB17039_08950	SB17040_00835	SB17042_00470
thyA		thymidylate synthase	46	46	1	99	7694				794	794	794	2E151-R_15495	HBI01_15665	HBI05_21010	HBI04_21360	HBI02_26740	HBI03_12540	PS148-R_15215	PS15001_00110	PS15002_14050	PS16001_24270	PS16002_03585	PS16003_08190	PS16004_07045	PS16005_09840	PS184-R_15365	PS310-R_16610	PS378-R_14765	PS57-R_14960	RL316_18860	RL320_20875	RL97_05150	SA17021_20250	SA17022_12685	SA17023_03645	SA17024_24530	SA17101_06930	SB17032_01310	SB17033_14065	SB17034_15720	SB17035_18920	SB17036_05640	SB17037_12495	SB17038_10420	SB17039_05955	SB17040_10710	SB17042_12775
pnp		polyribonucleotide nucleotidyltransferase	46	46	1	99	9094				2135	2135	2135	2E151-R_01490	HBI01_07110	HBI05_13400	HBI04_01770	HBI02_24405	HBI03_13045	PS148-R_00550	PS15001_06940	PS15002_21975	PS16001_10050	PS16002_25880	PS16003_02100	PS16004_03785	PS16005_08605	PS184-R_03285	PS310-R_04525	PS378-R_00550	PS57-R_00550	RL316_26330	RL320_24075	RL97_17200	SA17021_09600	SA17022_05975	SA17023_06285	SA17024_09335	SA17101_11215	SB17032_16845	SB17033_23295	SB17034_06285	SB17035_24220	SB17036_16470	SB17037_16520	SB17038_01865	SB17039_04815	SB17040_08050	SB17042_05565
ansA		asparaginase	46	46	1	99	9419				1016	1016	1016	2E151-R_05820	HBI01_19605	HBI05_23780	HBI04_12835	HBI02_21835	HBI03_00585	PS148-R_10180	PS15001_24825	PS15002_07120	PS16001_21600	PS16002_21145	PS16003_24960	PS16004_25900	PS16005_21625	PS184-R_00965	PS310-R_01760	PS378-R_07460	PS57-R_09260	RL316_21675	RL320_00330	RL97_03760	SA17021_08050	SA17022_20765	SA17023_19050	SA17024_11720	SA17101_22055	SB17032_20245	SB17033_25630	SB17034_04025	SB17035_08710	SB17036_19090	SB17037_07540	SB17038_20155	SB17039_16530	SB17040_14440	SB17042_10605
mltD		murein transglycosylase D	46	46	1	99	3559				1220	1220	1220	2E151-R_24865	HBI01_20595	HBI05_01510	HBI04_15305	HBI02_14775	HBI03_20790	PS148-R_24375	PS15001_16810	PS15002_12160	PS16001_24870	PS16002_12165	PS16003_14100	PS16004_24515	PS16005_12170	PS184-R_24925	PS310-R_24605	PS378-R_24980	PS57-R_24745	RL316_20660	RL320_18210	RL97_02510	SA17021_01485	SA17022_13010	SA17023_17345	SA17024_00595	SA17101_16355	SB17032_25785	SB17033_16290	SB17034_07520	SB17035_09410	SB17036_15620	SB17037_09740	SB17038_07670	SB17039_20415	SB17040_18040	SB17042_26445
ytfE		iron-sulfur cluster repair protein YtfE	46	46	1	99	6575				662	662	662	2E151-R_12690	HBI01_02390	HBI05_21795	HBI04_10145	HBI02_04915	HBI03_12135	PS148-R_12905	PS15001_17750	PS15002_05520	PS16001_20395	PS16002_04760	PS16003_22615	PS16004_08980	PS16005_15655	PS184-R_12260	PS310-R_14155	PS378-R_12865	PS57-R_10805	RL316_09015	RL320_02395	RL97_15420	SA17021_06000	SA17022_10850	SA17023_13760	SA17024_23295	SA17101_24090	SB17032_08330	SB17033_10680	SB17034_08255	SB17035_00520	SB17036_24645	SB17037_04695	SB17038_13910	SB17039_06960	SB17040_06980	SB17042_19180
ridA		2-iminobutanoate/2-iminopropanoate deaminase	46	46	1	99	6544				386	386	386	2E151-R_12855	HBI01_02225	HBI05_02845	HBI04_09970	HBI02_04745	HBI03_11970	PS148-R_12740	PS15001_17915	PS15002_05355	PS16001_20230	PS16002_04925	PS16003_22450	PS16004_08815	PS16005_15820	PS184-R_12425	PS310-R_13990	PS378-R_13030	PS57-R_10970	RL316_09180	RL320_02560	RL97_15255	SA17021_05835	SA17022_10685	SA17023_13595	SA17024_23130	SA17101_24275	SB17032_08515	SB17033_10515	SB17034_08420	SB17035_00685	SB17036_24810	SB17037_04860	SB17038_14075	SB17039_06795	SB17040_06815	SB17042_18995
clpX		ATP-dependent protease ATP-binding subunit ClpX	46	46	1	99	1986				1274	1274	1274	2E151-R_12130	HBI01_14210	HBI05_12625	HBI04_08125	HBI02_26070	HBI03_02105	PS148-R_11850	PS15001_01470	PS15002_04405	PS16001_06680	PS16002_01995	PS16003_10485	PS16004_00545	PS16005_17050	PS184-R_11700	PS310-R_13100	PS378-R_11910	PS57-R_10245	RL316_00730	RL320_11040	RL97_13970	SA17021_04775	SA17022_23380	SA17023_10715	SA17024_07555	SA17101_14310	SB17032_12960	SB17033_09680	SB17034_08905	SB17035_08405	SB17036_06570	SB17037_23895	SB17038_25525	SB17039_11360	SB17040_00115	SB17042_14750
rlmN		bifunctional tRNA (adenosine(37)-C2)-methyltransferase TrmG/ribosomal RNA large subunit methyltransferase RlmN	46	46	1	99	309				1154	1154	1154	2E151-R_14940	HBI01_20490	HBI05_06265	HBI04_23665	HBI02_09980	HBI03_09590	PS148-R_14465	PS15001_13430	PS15002_08770	PS16001_04350	PS16002_07840	PS16003_07675	PS16004_06950	PS16005_02690	PS184-R_14310	PS310-R_12055	PS378-R_11255	PS57-R_14100	RL316_09805	RL320_26180	RL97_11105	SA17021_03730	SA17022_03690	SA17023_20640	SA17024_02690	SA17101_05510	SB17032_15365	SB17033_07925	SB17034_11750	SB17035_20275	SB17036_04605	SB17037_05260	SB17038_07190	SB17039_09015	SB17040_00770	SB17042_00420
yfcC		putative basic amino acid antiporter YfcC	46	46	1	99	10238				1478	1478	1478	2E151-R_05085	HBI01_10865	HBI05_05375	HBI04_14610	HBI02_25755	HBI03_07170	PS148-R_03365	PS15001_14385	PS15002_03140	PS16001_03395	PS16002_11880	PS16003_06715	PS16004_01730	PS16005_14195	PS184-R_07085	PS310-R_08115	PS378-R_03365	PS57-R_04365	RL316_14635	RL320_08655	RL97_22035	SA17021_13295	SA17022_02735	SA17023_09930	SA17024_17910	SA17101_04405	SB17032_14090	SB17033_06790	SB17034_12710	SB17035_21235	SB17036_15265	SB17037_06220	SB17038_06235	SB17039_02630	SB17040_01725	SB17042_01460
ftsB		cell division protein FtsB	46	46	1	99	8103				311	311	311	2E151-R_16350	HBI01_08940	HBI05_15625	HBI04_19040	HBI02_17795	HBI03_18240	PS148-R_16045	PS15001_06030	PS15002_00405	PS16001_01640	PS16002_17590	PS16003_17935	PS16004_11605	PS16005_07375	PS184-R_15890	PS310-R_18125	PS378-R_15615	PS57-R_15485	RL316_18320	RL320_21420	RL97_14760	SA17021_19710	SA17022_08210	SA17023_15930	SA17024_25070	SA17101_06505	SB17032_01740	SB17033_13525	SB17034_15180	SB17035_19455	SB17036_06180	SB17037_19595	SB17038_10940	SB17039_06495	SB17040_11250	SB17042_17135
fkpA		FKBP-type peptidyl-prolyl cis-trans isomerase	46	46	1	99	6860				812	812	812	2E151-R_14350	HBI01_22620	HBI05_17525	HBI04_11105	HBI02_12190	HBI03_19275	PS148-R_13210	PS15001_11655	PS15002_22580	PS16001_13740	PS16002_18955	PS16003_13410	PS16004_14330	PS16005_06515	PS184-R_13915	PS310-R_14455	PS378-R_13670	PS57-R_13510	RL316_19580	RL320_13445	RL97_01035	SA17021_16375	SA17022_16200	SA17023_07740	SA17024_05805	SA17101_15000	SB17032_03990	SB17033_10905	SB17034_16485	SB17035_03435	SB17036_24020	SB17037_25480	SB17038_18745	SB17039_13350	SB17040_25700	SB17042_04995
glmM		phosphoglucosamine mutase	46	46	1	99	9084				1337	1337	1337	2E151-R_01560	HBI01_07180	HBI05_13470	HBI04_01840	HBI02_24475	HBI03_18965	PS148-R_00480	PS15001_07010	PS15002_22045	PS16001_10120	PS16002_25950	PS16003_02170	PS16004_03855	PS16005_08675	PS184-R_03215	PS310-R_04595	PS378-R_00480	PS57-R_00480	RL316_26400	RL320_24005	RL97_17270	SA17021_09530	SA17022_06045	SA17023_06355	SA17024_09405	SA17101_11285	SB17032_16775	SB17033_23225	SB17034_06215	SB17035_24290	SB17036_16400	SB17037_16590	SB17038_01795	SB17039_04885	SB17040_07980	SB17042_05495
accC		acetyl-CoA carboxylase biotin carboxylase subunit	46	46	1	99	9010				1349	1349	1349	2E151-R_01915	HBI01_07535	HBI05_13840	HBI04_20050	HBI02_03055	HBI03_13420	PS148-R_00125	PS15001_20030	PS15002_22400	PS16001_10475	PS16002_26305	PS16003_02525	PS16004_04210	PS16005_09030	PS184-R_02860	PS310-R_04950	PS378-R_00125	PS57-R_00125	RL316_26755	RL320_23650	RL97_17625	SA17021_09175	SA17022_06400	SA17023_22945	SA17024_09760	SA17101_11655	SB17032_16410	SB17033_22870	SB17034_09730	SB17035_24645	SB17036_16045	SB17037_16945	SB17038_01440	SB17039_05240	SB17040_07625	SB17042_05130
nlpI		lipoprotein NlpI	46	46	1	99	9095				884	887	884	2E151-R_01485	HBI01_07105	HBI05_13395	HBI04_01765	HBI02_24400	HBI03_13040	PS148-R_00555	PS15001_06935	PS15002_21970	PS16001_10045	PS16002_25875	PS16003_02095	PS16004_03780	PS16005_08600	PS184-R_03290	PS310-R_04520	PS378-R_00555	PS57-R_00555	RL316_26325	RL320_24080	RL97_17195	SA17021_09605	SA17022_05970	SA17023_06280	SA17024_09330	SA17101_11210	SB17032_16850	SB17033_23300	SB17034_06290	SB17035_24215	SB17036_16475	SB17037_16515	SB17038_01870	SB17039_04810	SB17040_08055	SB17042_05570
ydiB		quinate/shikimate dehydrogenase	46	46	1	99	2981				866	866	866	2E151-R_06445	HBI01_00180	HBI05_23235	HBI04_19540	HBI02_22510	HBI03_18110	PS148-R_10805	PS15001_25450	PS15002_07745	PS16001_22225	PS16002_21770	PS16003_25585	PS16004_10075	PS16005_22830	PS184-R_00340	PS310-R_02385	PS378-R_17630	PS57-R_08635	RL316_22300	RL320_17430	RL97_26085	SA17021_07285	SA17022_20140	SA17023_18420	SA17024_11095	SA17101_21670	SB17032_20635	SB17033_17255	SB17034_05865	SB17035_12535	SB17036_19485	SB17037_08185	SB17038_08235	SB17039_15905	SB17040_15080	SB17042_10995
actP		cation/acetate symporter ActP	46	46	1	99	2410				1649	1649	1649	2E151-R_21090	HBI01_22120	HBI05_19755	HBI04_06450	HBI02_01950	HBI03_04230	PS148-R_21330	PS15001_02375	PS15002_12740	PS16001_08465	PS16002_03115	PS16003_04920	PS16004_18285	PS16005_12630	PS184-R_21440	PS310-R_21360	PS378-R_21555	PS57-R_21400	RL316_23490	RL320_06335	RL97_22605	SA17021_11650	SA17022_04485	SA17023_01155	SA17024_03130	SA17101_08035	SB17032_08785	SB17033_08585	SB17034_01390	SB17035_11045	SB17036_08105	SB17037_14710	SB17038_09315	SB17039_07835	SB17040_06190	SB17042_17740
hemE		uroporphyrinogen decarboxylase	46	46	1	99	6759				1064	1064	1064	2E151-R_24980	HBI01_15375	HBI05_14000	HBI04_15185	HBI02_14855	HBI03_13995	PS148-R_24720	PS15001_11825	PS15002_11690	PS16001_13610	PS16002_12660	PS16003_13980	PS16004_21940	PS16005_23075	PS184-R_25090	PS310-R_24915	PS378-R_25060	PS57-R_24945	RL316_16155	RL320_17980	RL97_10380	SA17021_16545	SA17022_15805	SA17023_24445	SA17024_15630	SA17101_16235	SB17032_10890	SB17033_19765	SB17034_17280	SB17035_12935	SB17036_17385	SB17037_15930	SB17038_20320	SB17039_13220	SB17040_16210	SB17042_23945
malI		mal regulon transcriptional regulator MalI	46	46	1	99	3057				1028	1028	1028	2E151-R_06830	HBI01_00665	HBI05_04225	HBI04_25850	HBI02_09085	HBI03_12750	PS148-R_19580	PS15001_25835	PS15002_09035	PS16001_22610	PS16002_22155	PS16003_25970	PS16004_12755	PS16005_05330	PS184-R_19775	PS310-R_02770	PS378-R_20140	PS57-R_18790	RL316_22685	RL320_17045	RL97_25700	SA17021_06575	SA17022_19750	SA17023_18035	SA17024_10710	SA17101_21280	SB17032_22785	SB17033_16870	SB17034_05480	SB17035_12150	SB17036_25225	SB17037_08570	SB17038_08620	SB17039_15520	SB17040_15465	SB17042_11390
caiB		L-carnitine CoA-transferase	46	46	1	99	8942				1217	1217	1217	2E151-R_10525	HBI01_16760	HBI05_11465	HBI04_04775	HBI02_18770	HBI03_18540	PS148-R_07515	PS15001_20845	PS15002_25065	PS16001_13140	PS16002_23770	PS16003_11190	PS16004_23820	PS16005_24100	PS184-R_10095	PS310-R_10395	PS378-R_10100	PS57-R_07885	RL316_06035	RL320_04100	RL97_18350	SA17021_21155	SA17022_25610	SA17023_23570	SA17024_21825	SA17101_12700	SB17032_27875	SB17033_00920	SB17034_03865	SB17035_13695	SB17036_11730	SB17037_00765	SB17038_16900	SB17039_19275	SB17040_22945	SB17042_02820
malF		maltose ABC transporter permease MalF	46	46	1	99	2515				1544	1544	1544	2E151-R_24130	HBI01_22390	HBI05_00835	HBI04_06720	HBI02_00685	HBI03_06205	PS148-R_24025	PS15001_02645	PS15002_12470	PS16001_08195	PS16002_02845	PS16003_04650	PS16004_17210	PS16005_12360	PS184-R_24575	PS310-R_21095	PS378-R_24400	PS57-R_24250	RL316_23760	RL320_06605	RL97_22875	SA17021_11920	SA17022_04215	SA17023_00885	SA17024_03400	SA17101_07830	SB17032_09955	SB17033_08855	SB17034_01120	SB17035_11315	SB17036_07835	SB17037_14440	SB17038_09585	SB17039_08105	SB17040_06460	SB17042_17940
galT		galactose-1-phosphate uridylyltransferase	46	46	1	99	9903				1046	1046	1046	2E151-R_02095	HBI01_04930	HBI05_19550	HBI04_26540	HBI02_10980	HBI03_03745	PS148-R_03855	PS15001_12095	PS15002_09740	PS16001_16695	PS16002_09220	PS16003_09520	PS16004_13705	PS16005_10890	PS184-R_04820	PS310-R_05125	PS378-R_05635	PS57-R_03855	RL316_17440	RL320_15465	RL97_08725	SA17021_01585	SA17022_06825	SA17023_12595	SA17024_01190	SA17101_20385	SB17032_06275	SB17033_05045	SB17034_20730	SB17035_06970	SB17036_03955	SB17037_11550	SB17038_03010	SB17039_22100	SB17040_20370	SB17042_07440
putA		trifunctional transcriptional regulator/proline dehydrogenase/L-glutamate gamma-semialdehyde dehydrogenase	46	46	1	99	712				3962	3962	3962	2E151-R_03310	HBI01_01955	HBI05_14480	HBI04_10785	HBI02_01515	HBI03_21655	PS148-R_05070	PS15001_22575	PS15002_01775	PS16001_18010	PS16002_10250	PS16003_15520	PS16004_19930	PS16005_18770	PS184-R_06035	PS310-R_06340	PS378-R_04420	PS57-R_02640	RL316_24635	RL320_23360	RL97_06495	SA17021_00260	SA17022_08925	SA17023_01845	SA17024_16670	SA17101_02530	SB17032_21955	SB17033_02955	SB17034_19515	SB17035_04860	SB17036_10225	SB17037_03035	SB17038_12755	SB17039_23315	SB17040_19155	SB17042_09285
mnmA		tRNA 2-thiouridine(34) synthase MnmA	46	46	1	99	3676				1106	1106	1106	2E151-R_03890	HBI01_23375	HBI05_15060	HBI04_20945	HBI02_24855	HBI03_22900	PS148-R_05650	PS15001_21995	PS15002_01195	PS16001_12120	PS16002_09670	PS16003_15780	PS16004_17635	PS16005_25500	PS184-R_06615	PS310-R_06920	PS378-R_03840	PS57-R_02060	RL316_24055	RL320_22780	RL97_07075	SA17021_13725	SA17022_08345	SA17023_02425	SA17024_17255	SA17101_03090	SB17032_04685	SB17033_12410	SB17034_18935	SB17035_05440	SB17036_17805	SB17037_10015	SB17038_12175	SB17039_03955	SB17040_11735	SB17042_09995
trmD		tRNA (guanosine(37)-N1)-methyltransferase TrmD	46	46	1	99	7879				767	767	767	2E151-R_21720	HBI01_02765	HBI05_13000	HBI04_02800	HBI02_14395	HBI03_07005	PS148-R_21840	PS15001_10665	PS15002_17650	PS16001_26280	PS16002_07670	PS16003_24195	PS16004_10945	PS16005_03165	PS184-R_21990	PS310-R_22445	PS378-R_22185	PS57-R_21950	RL316_17710	RL320_05870	RL97_16490	SA17021_11205	SA17022_14680	SA17023_14315	SA17024_06340	SA17101_05920	SB17032_03185	SB17033_12915	SB17034_17835	SB17035_11485	SB17036_13465	SB17037_13815	SB17038_14345	SB17039_21075	SB17040_16810	SB17042_23640
pepN		aminopeptidase N	46	46	1	99	814				2612	2612	2612	2E151-R_02970	HBI01_01615	HBI05_04975	HBI04_24920	HBI02_09620	HBI03_21315	PS148-R_04730	PS15001_22915	PS15002_02115	PS16001_18350	PS16002_10590	PS16003_15180	PS16004_14510	PS16005_19110	PS184-R_05695	PS310-R_06000	PS378-R_04760	PS57-R_02980	RL316_16565	RL320_14590	RL97_06155	SA17021_00600	SA17022_09265	SA17023_16400	SA17024_16330	SA17101_02120	SB17032_21545	SB17033_03295	SB17034_19855	SB17035_04520	SB17036_10565	SB17037_03375	SB17038_13095	SB17039_22975	SB17040_19495	SB17042_15470
exoX		exodeoxyribonuclease X	46	46	1	99	9507				662	662	662	2E151-R_10025	HBI01_00865	HBI05_15790	HBI04_03220	HBI02_22240	HBI03_01740	PS148-R_09795	PS15001_03875	PS15002_16555	PS16001_07070	PS16002_20750	PS16003_20675	PS16004_19410	PS16005_20615	PS184-R_01360	PS310-R_01365	PS378-R_07065	PS57-R_12520	RL316_12380	RL320_10515	RL97_10645	SA17021_08445	SA17022_21160	SA17023_19440	SA17024_12115	SA17101_00555	SB17032_19835	SB17033_15655	SB17034_04420	SB17035_03685	SB17036_22670	SB17037_07145	SB17038_19760	SB17039_16925	SB17040_14045	SB17042_13395
panF		sodium/pantothenate symporter	46	46	1	99	9008				1451	1451	1451	2E151-R_01965	HBI01_07585	HBI05_13850	HBI04_13070	HBI02_03045	HBI03_02245	PS148-R_00075	PS15001_20080	PS15002_22450	PS16001_10525	PS16002_26355	PS16003_02575	PS16004_04260	PS16005_09080	PS184-R_02810	PS310-R_05000	PS378-R_00075	PS57-R_00075	RL316_26805	RL320_23600	RL97_17675	SA17021_09125	SA17022_06450	SA17023_17090	SA17024_09810	SA17101_11665	SB17032_16400	SB17033_22820	SB17034_09680	SB17035_24695	SB17036_15995	SB17037_16995	SB17038_01390	SB17039_05290	SB17040_07575	SB17042_05120
ugpB		sn-glycerol-3-phosphate ABC transporter substrate-binding protein UgpB	46	46	1	99	6973				1316	1316	1316	2E151-R_13850	HBI01_03940	HBI05_18420	HBI04_13185	HBI02_07030	HBI03_14690	PS148-R_13710	PS15001_02885	PS15002_23080	PS16001_14240	PS16002_18455	PS16003_12910	PS16004_18925	PS16005_06015	PS184-R_13415	PS310-R_14955	PS378-R_14170	PS57-R_13010	RL316_20080	RL320_13945	RL97_00555	SA17021_15875	SA17022_16700	SA17023_08240	SA17024_05305	SA17101_26555	SB17032_03485	SB17033_11405	SB17034_25805	SB17035_02935	SB17036_23520	SB17037_24980	SB17038_18245	SB17039_13850	SB17040_25200	SB17042_04490
fucP		L-fucose:H+ symporter permease	46	46	1	99	7718				1316	1316	1316	2E151-R_16610	HBI01_09200	HBI05_20880	HBI04_20975	HBI02_26870	HBI03_24415	PS148-R_15785	PS15001_06290	PS15002_00145	PS16001_01900	PS16002_17850	PS16003_18195	PS16004_20130	PS16005_07115	PS184-R_15630	PS310-R_18385	PS378-R_15875	PS57-R_15225	RL316_18580	RL320_21160	RL97_15020	SA17021_19970	SA17022_07950	SA17023_16190	SA17024_24810	SA17101_06790	SB17032_01450	SB17033_13785	SB17034_15440	SB17035_19195	SB17036_05920	SB17037_19335	SB17038_10680	SB17039_06235	SB17040_10990	SB17042_12915
ptsA		Multiphosphoryl transfer protein 2	46	46	1	99	941				2501	2501	2501	2E151-R_20185	HBI01_25840	HBI05_18760	HBI04_07715	HBI02_13575	HBI03_05285	PS148-R_20545	PS15001_16035	PS15002_00620	PS16001_11035	PS16002_05245	PS16003_00430	PS16004_06515	PS16005_04065	PS184-R_20285	PS310-R_17225	PS378-R_20650	PS57-R_19830	RL316_03985	RL320_16065	RL97_12500	SA17021_16730	SA17022_11455	SA17023_07610	SA17024_12910	SA17101_22325	SB17032_09050	SB17033_06320	SB17034_24015	SB17035_09550	SB17036_07440	SB17037_09510	SB17038_04260	SB17039_00560	SB17040_08985	SB17042_20195
alaS		alanine--tRNA ligase	46	46	1	99	8039				2630	2630	2630	2E151-R_16015	HBI01_08660	HBI05_15365	HBI04_21040	HBI02_17535	HBI03_11305	PS148-R_16380	PS15001_10395	PS15002_17920	PS16001_26550	PS16002_15185	PS16003_24465	PS16004_18555	PS16005_11765	PS184-R_16220	PS310-R_17795	PS378-R_15285	PS57-R_15820	RL316_17985	RL320_05595	RL97_11675	SA17021_10935	SA17022_14960	SA17023_14590	SA17024_06065	SA17101_06215	SB17032_01995	SB17033_13190	SB17034_14035	SB17035_22880	SB17036_13185	SB17037_14095	SB17038_14625	SB17039_20795	SB17040_16525	SB17042_16880
lptG		LPS export ABC transporter permease LptG	46	46	1	99	6528				1082	1082	1082	2E151-R_12950	HBI01_02130	HBI05_02750	HBI04_08720	HBI02_00845	HBI03_03980	PS148-R_12645	PS15001_18010	PS15002_05260	PS16001_20135	PS16002_05020	PS16003_22355	PS16004_08720	PS16005_15915	PS184-R_12520	PS310-R_13895	PS378-R_13125	PS57-R_11065	RL316_09275	RL320_02655	RL97_15160	SA17021_05740	SA17022_10590	SA17023_13500	SA17024_23035	SA17101_24370	SB17032_08610	SB17033_10420	SB17034_08515	SB17035_00780	SB17036_24905	SB17037_04955	SB17038_14170	SB17039_06700	SB17040_06720	SB17042_18895
zntR		Zn(2+)-responsive transcriptional regulator	46	46	1	99	6797				425	425	425	2E151-R_23695	HBI01_09430	HBI05_17320	HBI04_05565	HBI02_12900	HBI03_21870	PS148-R_23365	PS15001_18650	PS15002_17305	PS16001_18800	PS16002_22785	PS16003_23225	PS16004_25360	PS16005_22545	PS184-R_23795	PS310-R_24020	PS378-R_24160	PS57-R_23630	RL316_02140	RL320_03170	RL97_02855	SA17021_17895	SA17022_15925	SA17023_25440	SA17024_14360	SA17101_08685	SB17032_06755	SB17033_21075	SB17034_24670	SB17035_25400	SB17036_21050	SB17037_10375	SB17038_19020	SB17039_11000	SB17040_17070	SB17042_24520
gntU		gluconate transporter	46	46	1	99	6958				1340	1340	1340	2E151-R_13915	HBI01_03875	HBI05_17985	HBI04_18820	HBI02_20585	HBI03_14625	PS148-R_13645	PS15001_02950	PS15002_23015	PS16001_14175	PS16002_18520	PS16003_12975	PS16004_18990	PS16005_06080	PS184-R_13480	PS310-R_14890	PS378-R_14105	PS57-R_13075	RL316_20015	RL320_13880	RL97_00490	SA17021_15940	SA17022_16635	SA17023_08175	SA17024_05370	SA17101_26640	SB17032_03550	SB17033_11340	SB17034_25870	SB17035_03000	SB17036_23585	SB17037_25045	SB17038_18310	SB17039_13785	SB17040_25265	SB17042_04555
galS		HTH-type transcriptional regulator GalS	46	46	1	99	37				1040	1040	1040	2E151-R_04325	HBI01_18335	HBI05_09900	HBI04_17150	HBI02_06175	HBI03_10945	PS148-R_02605	PS15001_15145	PS15002_03900	PS16001_02635	PS16002_15515	PS16003_05955	PS16004_02890	PS16005_14590	PS184-R_07845	PS310-R_07355	PS378-R_02605	PS57-R_05125	RL316_15395	RL320_12705	RL97_05825	SA17021_12930	SA17022_01975	SA17023_09165	SA17024_20025	SA17101_03710	SB17032_24300	SB17033_18890	SB17034_14390	SB17035_21995	SB17036_03235	SB17037_06980	SB17038_05475	SB17039_03390	SB17040_02485	SB17042_08205
yraR		Putative NAD(P)-binding protein YraR	46	46	1	99	9108				635	635	635	2E151-R_01425	HBI01_07045	HBI05_13325	HBI04_01705	HBI02_24330	HBI03_12980	PS148-R_00615	PS15001_06875	PS15002_21910	PS16001_09985	PS16002_25815	PS16003_02035	PS16004_03720	PS16005_08540	PS184-R_03350	PS310-R_04460	PS378-R_00615	PS57-R_00615	RL316_26265	RL320_24140	RL97_17135	SA17021_09665	SA17022_05910	SA17023_06220	SA17024_09270	SA17101_11150	SB17032_16910	SB17033_23360	SB17034_06350	SB17035_24155	SB17036_16535	SB17037_16455	SB17038_01930	SB17039_04750	SB17040_08115	SB17042_05630
hycE		formate hydrogenlyase subunit HycE	46	46	1	99	8066				1709	1709	1709	2E151-R_16130	HBI01_08775	HBI05_15485	HBI04_21165	HBI02_17655	HBI03_10775	PS148-R_16265	PS15001_10280	PS15002_18035	PS16001_17365	PS16002_15070	PS16003_24580	PS16004_18435	PS16005_11650	PS184-R_16105	PS310-R_17910	PS378-R_15400	PS57-R_15705	RL316_18100	RL320_05480	RL97_11560	SA17021_10820	SA17022_15075	SA17023_14705	SA17024_05950	SA17101_06345	SB17032_01875	SB17033_13305	SB17034_14150	SB17035_22765	SB17036_13070	SB17037_14210	SB17038_14740	SB17039_20680	SB17040_16410	SB17042_17000
metL		bifunctional aspartate kinase/homoserine dehydrogenase II	46	46	1	99	951				2432	2432	2432	2E151-R_20230	HBI01_25885	HBI05_18715	HBI04_19150	HBI02_13620	HBI03_05330	PS148-R_20500	PS15001_16080	PS15002_00665	PS16001_11080	PS16002_05290	PS16003_00475	PS16004_06470	PS16005_04020	PS184-R_20330	PS310-R_17270	PS378-R_20695	PS57-R_19875	RL316_03940	RL320_16020	RL97_12455	SA17021_16775	SA17022_11500	SA17023_07565	SA17024_14945	SA17101_22360	SB17032_09015	SB17033_06275	SB17034_24060	SB17035_09595	SB17036_07395	SB17037_09465	SB17038_04305	SB17039_00515	SB17040_08940	SB17042_20160
hlx		Putative hemolysin	46	46	1	99	3825				266	266	266	2E151-R_17310	HBI01_14840	HBI05_16740	HBI04_13560	HBI02_11435	HBI03_03580	PS148-R_17030	PS15001_04005	PS15002_18215	PS16001_24935	PS16002_20215	PS16003_23815	PS16004_13945	PS16005_25305	PS184-R_16875	PS310-R_18485	PS378-R_15980	PS57-R_16470	RL316_12830	RL320_18740	RL97_14285	SA17021_25560	SA17022_17665	SA17023_24740	SA17024_00040	SA17101_18890	SB17032_11520	SB17033_21980	SB17034_23150	SB17035_17260	SB17036_14000	SB17037_18225	SB17038_24740	SB17039_24470	SB17040_03190	SB17042_11725
degS		outer membrane-stress sensor serine endopeptidase DegS	46	46	1	99	9030				1067	1067	1067	2E151-R_01820	HBI01_07440	HBI05_13740	HBI04_02100	HBI02_03155	HBI03_19225	PS148-R_00220	PS15001_07270	PS15002_22305	PS16001_10380	PS16002_26210	PS16003_02430	PS16004_04115	PS16005_08935	PS184-R_02955	PS310-R_04855	PS378-R_00220	PS57-R_00220	RL316_26660	RL320_23745	RL97_17530	SA17021_09270	SA17022_06305	SA17023_06615	SA17024_09665	SA17101_11555	SB17032_16505	SB17033_22965	SB17034_09825	SB17035_24550	SB17036_16140	SB17037_16850	SB17038_01535	SB17039_05145	SB17040_07720	SB17042_05225
rsxE		electron transport complex subunit RsxE	46	46	1	99	3044				695	695	695	2E151-R_06770	HBI01_03240	HBI05_23565	HBI04_08990	HBI02_09025	HBI03_12690	PS148-R_11130	PS15001_25775	PS15002_08070	PS16001_22550	PS16002_22095	PS16003_25910	PS16004_12815	PS16005_05390	PS184-R_00015	PS310-R_02710	PS378-R_17305	PS57-R_08310	RL316_22625	RL320_17105	RL97_25760	SA17021_06515	SA17022_19810	SA17023_18095	SA17024_10770	SA17101_21340	SB17032_20975	SB17033_16930	SB17034_05540	SB17035_12210	SB17036_25285	SB17037_08510	SB17038_08560	SB17039_15580	SB17040_15405	SB17042_11325
hxpA		hexitol phosphatase HxpA	46	46	1	99	10243				650	650	650	2E151-R_05060	HBI01_10840	HBI05_05350	HBI04_14585	HBI02_25730	HBI03_07145	PS148-R_03340	PS15001_14410	PS15002_03165	PS16001_03370	PS16002_11855	PS16003_06690	PS16004_01755	PS16005_14170	PS184-R_07110	PS310-R_08090	PS378-R_03340	PS57-R_04390	RL316_14660	RL320_08630	RL97_22010	SA17021_13270	SA17022_02710	SA17023_09905	SA17024_17885	SA17101_04380	SB17032_14065	SB17033_06815	SB17034_12735	SB17035_21260	SB17036_15290	SB17037_06245	SB17038_06210	SB17039_02655	SB17040_01750	SB17042_01485
hypE		hydrogenase maturation carbamoyl dehydratase HypE	46	46	1	99	8077				1010	1010	1010	2E151-R_16175	HBI01_08820	HBI05_15530	HBI04_21210	HBI02_17700	HBI03_10820	PS148-R_16220	PS15001_10235	PS15002_18080	PS16001_01470	PS16002_15025	PS16003_24625	PS16004_18390	PS16005_11605	PS184-R_16060	PS310-R_17955	PS378-R_15445	PS57-R_15660	RL316_18145	RL320_05435	RL97_11515	SA17021_10775	SA17022_15120	SA17023_14750	SA17024_05905	SA17101_06390	SB17032_01830	SB17033_13350	SB17034_14195	SB17035_22720	SB17036_13025	SB17037_14255	SB17038_14785	SB17039_20635	SB17040_16365	SB17042_17045
ftsN		cell division protein FtsN	46	46	1	99	963				854	854	854	2E151-R_20265	HBI01_25920	HBI05_18680	HBI04_19185	HBI02_13655	HBI03_05365	PS148-R_20465	PS15001_16115	PS15002_00700	PS16001_11115	PS16002_05325	PS16003_00510	PS16004_06435	PS16005_03985	PS184-R_20365	PS310-R_17305	PS378-R_20730	PS57-R_19910	RL316_03905	RL320_15985	RL97_12420	SA17021_16810	SA17022_11535	SA17023_07530	SA17024_14910	SA17101_08870	SB17032_08970	SB17033_06240	SB17034_24095	SB17035_09630	SB17036_07360	SB17037_09430	SB17038_04340	SB17039_00480	SB17040_08905	SB17042_20115
dhaK		dihydroxyacetone kinase subunit DhaK	46	46	1	99	6026				1070	1070	1070	2E151-R_18970	HBI01_08430	HBI05_25105	HBI04_25505	HBI02_07300	HBI03_04395	PS148-R_18215	PS15001_04820	PS15002_19030	PS16001_25750	PS16002_08565	PS16003_16815	PS16004_00070	PS16005_04515	PS184-R_18060	PS310-R_15530	PS378-R_18145	PS57-R_17660	RL316_13645	RL320_25590	RL97_21790	SA17021_24745	SA17022_18480	SA17023_02675	SA17024_20640	SA17101_19695	SB17032_12405	SB17033_07300	SB17034_12895	SB17035_16440	SB17036_09630	SB17037_19040	SB17038_00400	SB17039_25285	SB17040_04005	SB17042_10260
yhhA		DUF2756 domain-containing protein	46	46	1	99	6968				440	440	440	2E151-R_13875	HBI01_03915	HBI05_18445	HBI04_13210	HBI02_07055	HBI03_14665	PS148-R_13685	PS15001_02910	PS15002_23055	PS16001_14215	PS16002_18480	PS16003_12935	PS16004_18950	PS16005_06040	PS184-R_13440	PS310-R_14930	PS378-R_14145	PS57-R_13035	RL316_20055	RL320_13920	RL97_00530	SA17021_15900	SA17022_16675	SA17023_08215	SA17024_05330	SA17101_26580	SB17032_03510	SB17033_11380	SB17034_25830	SB17035_02960	SB17036_23545	SB17037_25005	SB17038_18270	SB17039_13825	SB17040_25225	SB17042_04515
shiA		shikimate transporter	46	46	1	99	9703				1316	1316	1316	2E151-R_09120	HBI01_03510	HBI05_08065	HBI04_01350	HBI02_03745	HBI03_19700	PS148-R_08890	PS15001_19430	PS15002_15650	PS16001_07975	PS16002_13665	PS16003_21575	PS16004_12160	PS16005_13940	PS184-R_02260	PS310-R_00460	PS378-R_06160	PS57-R_11615	RL316_11475	RL320_08025	RL97_09760	SA17021_02885	SA17022_22065	SA17023_15355	SA17024_18600	SA17101_17090	SB17032_13170	SB17033_15215	SB17034_10235	SB17035_23440	SB17036_13700	SB17037_22055	SB17038_22475	SB17039_24240	SB17040_13140	SB17042_24055
yegW		Uncharacterized HTH-type transcriptional regulator YegW	46	46	1	99	1140				746	746	746	2E151-R_04060	HBI01_18600	HBI05_12425	HBI04_04500	HBI02_02190	HBI03_18065	PS148-R_02340	PS15001_15410	PS15002_13120	PS16001_02370	PS16002_15780	PS16003_05690	PS16004_03155	PS16005_18465	PS184-R_08110	PS310-R_07090	PS378-R_02340	PS57-R_05390	RL316_15660	RL320_12440	RL97_16195	SA17021_12665	SA17022_01710	SA17023_08900	SA17024_19760	SA17101_03440	SB17032_24585	SB17033_19155	SB17034_14655	SB17035_22260	SB17036_03500	SB17037_20395	SB17038_05210	SB17039_03655	SB17040_02750	SB17042_08490
ccmA		cytochrome c biogenesis heme-transporting ATPase CcmA	46	46	1	99	10353				617	623	618	2E151-R_04580	HBI01_18080	HBI05_21735	HBI04_17400	HBI02_09420	HBI03_11195	PS148-R_02860	PS15001_14890	PS15002_03645	PS16001_02890	PS16002_15255	PS16003_06210	PS16004_02635	PS16005_14845	PS184-R_07590	PS310-R_07610	PS378-R_02860	PS57-R_04870	RL316_15140	RL320_13040	RL97_05570	SA17021_13185	SA17022_02230	SA17023_09425	SA17024_14670	SA17101_03955	SB17032_24045	SB17033_18635	SB17034_18565	SB17035_21740	SB17036_02980	SB17037_06725	SB17038_05730	SB17039_03135	SB17040_02230	SB17042_07950
yggE		oxidative stress defense protein	46	46	1	99	7475				740	740	740	2E151-R_15895	HBI01_16070	HBI05_24445	HBI04_00500	HBI02_22970	HBI03_17655	PS148-R_15615	PS15001_00515	PS15002_14455	PS16001_23870	PS16002_03985	PS16003_08595	PS16004_07445	PS16005_09435	PS184-R_14965	PS310-R_17010	PS378-R_15165	PS57-R_14560	RL316_19265	RL320_20470	RL97_24870	SA17021_20655	SA17022_12280	SA17023_04050	SA17024_24130	SA17101_07505	SB17032_05610	SB17033_14470	SB17034_16125	SB17035_18515	SB17036_05235	SB17037_12900	SB17038_10015	SB17039_04285	SB17040_10310	SB17042_22285
xseB		exodeoxyribonuclease VII small subunit	46	46	1	99	1969				242	242	242	2E151-R_12045	HBI01_14125	HBI05_12540	HBI04_08040	HBI02_25985	HBI03_02020	PS148-R_11765	PS15001_01385	PS15002_04490	PS16001_06595	PS16002_02080	PS16003_10400	PS16004_00630	PS16005_16965	PS184-R_11615	PS310-R_13015	PS378-R_11995	PS57-R_10160	RL316_00815	RL320_11125	RL97_14055	SA17021_04860	SA17022_23295	SA17023_10800	SA17024_07470	SA17101_14210	SB17032_13045	SB17033_09765	SB17034_08990	SB17035_08490	SB17036_06655	SB17037_23980	SB17038_25610	SB17039_11445	SB17040_00030	SB17042_14835
recG		ATP-dependent DNA helicase RecG	46	46	1	99	4842				2081	2081	2081	2E151-R_08035	HBI01_04455	HBI05_08765	HBI04_19840	HBI02_04105	HBI03_06950	PS148-R_06495	PS15001_05805	PS15002_06140	PS16001_00610	PS16002_01095	PS16003_03665	PS16004_07960	PS16005_01305	PS184-R_08860	PS310-R_09165	PS378-R_08360	PS57-R_06360	RL316_03250	RL320_09245	RL97_08435	SA17021_14655	SA17022_00705	SA17023_04570	SA17024_04170	SA17101_01410	SB17032_18475	SB17033_01930	SB17034_01995	SB17035_06285	SB17036_01000	SB17037_21440	SB17038_21345	SB17039_01680	SB17040_05215	SB17042_19265
yjbD		Uncharacterized protein YjbD	46	46	1	99	2503				272	272	272	2E151-R_24185	HBI01_22445	HBI05_00885	HBI04_13750	HBI02_00730	HBI03_06505	PS148-R_24080	PS15001_15815	PS15002_12415	PS16001_08140	PS16002_02790	PS16003_04595	PS16004_17155	PS16005_12305	PS184-R_24520	PS310-R_21040	PS378-R_24455	PS57-R_24195	RL316_23815	RL320_06665	RL97_22930	SA17021_11975	SA17022_04160	SA17023_00830	SA17024_03455	SA17101_07760	SB17032_10015	SB17033_08910	SB17034_01065	SB17035_11370	SB17036_07780	SB17037_14385	SB17038_09640	SB17039_08160	SB17040_06515	SB17042_18000
syd		SecY-interacting protein	46	46	1	99	7726				545	545	545	2E151-R_16570	HBI01_09160	HBI05_20840	HBI04_20780	HBI02_26910	HBI03_12630	PS148-R_15825	PS15001_06250	PS15002_00185	PS16001_01860	PS16002_17810	PS16003_18155	PS16004_11385	PS16005_07155	PS184-R_15670	PS310-R_18345	PS378-R_15835	PS57-R_15265	RL316_18540	RL320_21200	RL97_14980	SA17021_19930	SA17022_07990	SA17023_16150	SA17024_24850	SA17101_06750	SB17032_01490	SB17033_13745	SB17034_15400	SB17035_19235	SB17036_05960	SB17037_19375	SB17038_10720	SB17039_06275	SB17040_11030	SB17042_12955
ratB		RnfH family protein	46	46	1	99	7889				290	290	290	2E151-R_21770	HBI01_02815	HBI05_13050	HBI04_02850	HBI02_14445	HBI03_07055	PS148-R_21790	PS15001_10615	PS15002_17700	PS16001_26330	PS16002_07620	PS16003_24245	PS16004_10895	PS16005_03115	PS184-R_21940	PS310-R_22495	PS378-R_22235	PS57-R_21900	RL316_17760	RL320_05820	RL97_16540	SA17021_11155	SA17022_14730	SA17023_14365	SA17024_06290	SA17101_05970	SB17032_03135	SB17033_12965	SB17034_17785	SB17035_11535	SB17036_13415	SB17037_13865	SB17038_14395	SB17039_21025	SB17040_16755	SB17042_23690
marR		multiple antibiotic resistance transcriptional regulator MarR	46	46	1	99	3320				434	434	434	2E151-R_07085	HBI01_00405	HBI05_00550	HBI04_03760	HBI02_06670	HBI03_00775	PS148-R_19835	PS15001_26090	PS15002_09295	PS16001_22870	PS16002_22420	PS16003_26230	PS16004_12495	PS16005_00615	PS184-R_19515	PS310-R_03025	PS378-R_19880	PS57-R_18530	RL316_22945	RL320_16785	RL97_25440	SA17021_06835	SA17022_19490	SA17023_17775	SA17024_10450	SA17101_25755	SB17032_25265	SB17033_16610	SB17034_18050	SB17035_11890	SB17036_15865	SB17037_08830	SB17038_08880	SB17039_15260	SB17040_15725	SB17042_23215
DUF2543 domain-containing protein		DUF2543 domain-containing protein	46	46	1	99	6192				245	245	245	2E151-R_17055	HBI01_15095	HBI05_16975	HBI04_09195	HBI02_02550	HBI03_19975	PS148-R_16775	PS15001_04260	PS15002_18470	PS16001_25190	PS16002_16360	PS16003_23560	PS16004_02145	PS16005_05075	PS184-R_16620	PS310-R_18740	PS378-R_16235	PS57-R_16215	RL316_13085	RL320_18995	RL97_21230	SA17021_25305	SA17022_17920	SA17023_24995	SA17024_00295	SA17101_19185	SB17032_11815	SB17033_22240	SB17034_23405	SB17035_17005	SB17036_18125	SB17037_18480	SB17038_24485	SB17039_24725	SB17040_03445	SB17042_12025
rpmE2		type B 50S ribosomal protein L31	46	46	1	99	1811				263	266	265	2E151-R_11495	HBI01_03365	HBI05_10400	HBI04_01415	HBI02_00590	HBI03_04425	PS148-R_11215	PS15001_00835	PS15002_05040	PS16001_06045	PS16002_02630	PS16003_09850	PS16004_11755	PS16005_11945	PS184-R_11065	PS310-R_12465	PS378-R_12545	PS57-R_09610	RL316_01365	RL320_11675	RL97_14430	SA17021_05410	SA17022_15260	SA17023_17235	SA17024_13225	SA17101_14750	SB17032_05785	SB17033_10315	SB17034_09540	SB17035_00930	SB17036_07620	SB17037_24530	SB17038_26160	SB17039_11995	SB17040_17955	SB17042_23380
dinB		DNA polymerase IV	46	46	1	99	3651				1055	1055	1055	2E151-R_22930	HBI01_19045	HBI05_07010	HBI04_10445	HBI02_09860	HBI03_03895	PS148-R_22915	PS15001_17415	PS15002_19520	PS16001_10755	PS16002_07310	PS16003_18925	PS16004_20930	PS16005_17925	PS184-R_23030	PS310-R_23255	PS378-R_23395	PS57-R_23025	RL316_04350	RL320_03505	RL97_20350	SA17021_23880	SA17022_22705	SA17023_21755	SA17024_06530	SA17101_15440	SB17032_05950	SB17033_22575	SB17034_06035	SB17035_23060	SB17036_00115	SB17037_11040	SB17038_11765	SB17039_05525	SB17040_26090	SB17042_23545
lolE		lipoprotein-releasing ABC transporter permease subunit LolE	46	46	1	99	2743				1238	1238	1238	2E151-R_03815	HBI01_23450	HBI05_14980	HBI04_20870	HBI02_25300	HBI03_17370	PS148-R_05575	PS15001_22070	PS15002_01270	PS16001_12045	PS16002_09745	PS16003_15855	PS16004_17560	PS16005_21475	PS184-R_06540	PS310-R_06845	PS378-R_03915	PS57-R_02135	RL316_24130	RL320_22855	RL97_07000	SA17021_13800	SA17022_08420	SA17023_02350	SA17024_17180	SA17101_03015	SB17032_04620	SB17033_12335	SB17034_19010	SB17035_05365	SB17036_17730	SB17037_10090	SB17038_12250	SB17039_04030	SB17040_11660	SB17042_09930
yhbW		luciferase-like monooxygenase	46	46	1	99	9100				1007	1007	1007	2E151-R_01465	HBI01_07085	HBI05_13365	HBI04_01745	HBI02_24370	HBI03_13020	PS148-R_00575	PS15001_06915	PS15002_21950	PS16001_10025	PS16002_25855	PS16003_02075	PS16004_03760	PS16005_08580	PS184-R_03310	PS310-R_04500	PS378-R_00575	PS57-R_00575	RL316_26305	RL320_24100	RL97_17175	SA17021_09625	SA17022_05950	SA17023_06260	SA17024_09310	SA17101_11190	SB17032_16870	SB17033_23320	SB17034_06310	SB17035_24195	SB17036_16495	SB17037_16495	SB17038_01890	SB17039_04790	SB17040_08075	SB17042_05590
ybhK		Putative gluconeogenesis factor	46	46	1	99	9928				908	908	908	2E151-R_02205	HBI01_12790	HBI05_07605	HBI04_26425	HBI02_24090	HBI03_24365	PS148-R_03965	PS15001_23680	PS15002_02880	PS16001_05955	PS16002_11355	PS16003_14415	PS16004_19235	PS16005_17535	PS184-R_04930	PS310-R_05235	PS378-R_05525	PS57-R_03745	RL316_17330	RL320_15355	RL97_08835	SA17021_01365	SA17022_10030	SA17023_00040	SA17024_01080	SA17101_20495	SB17032_06390	SB17033_04935	SB17034_20620	SB17035_06860	SB17036_04065	SB17037_04140	SB17038_02900	SB17039_22210	SB17040_20260	SB17042_07550
creB		two-component system response regulator CreB	46	46	1	99	8663				689	689	689	2E151-R_10300	HBI01_16990	HBI05_19040	HBI04_22640	HBI02_15090	HBI03_09165	PS148-R_07285	PS15001_20615	PS15002_24840	PS16001_13370	PS16002_24000	PS16003_10960	PS16004_24050	PS16005_23870	PS184-R_09865	PS310-R_10170	PS378-R_10330	PS57-R_08115	RL316_05810	RL320_03870	RL97_04415	SA17021_20925	SA17022_25380	SA17023_23800	SA17024_22055	SA17101_12470	SB17032_28105	SB17033_04395	SB17034_03640	SB17035_13465	SB17036_11960	SB17037_00535	SB17038_16670	SB17039_19045	SB17040_22715	SB17042_03045
ppa		inorganic diphosphatase	46	46	1	99	6561				530	530	530	2E151-R_12765	HBI01_02315	HBI05_02940	HBI04_10070	HBI02_04840	HBI03_12060	PS148-R_12830	PS15001_17825	PS15002_05445	PS16001_20320	PS16002_04835	PS16003_22540	PS16004_08905	PS16005_15730	PS184-R_12335	PS310-R_14080	PS378-R_12940	PS57-R_10880	RL316_09090	RL320_02470	RL97_15345	SA17021_05925	SA17022_10775	SA17023_13685	SA17024_23220	SA17101_24180	SB17032_08420	SB17033_10605	SB17034_08330	SB17035_00595	SB17036_24720	SB17037_04770	SB17038_13985	SB17039_06885	SB17040_06905	SB17042_19090
rsxB		electron transport complex subunit RsxB	46	46	1	99	3048				578	578	578	2E151-R_06790	HBI01_00705	HBI05_04265	HBI04_25890	HBI02_09045	HBI03_12710	PS148-R_19540	PS15001_25795	PS15002_08995	PS16001_22570	PS16002_22115	PS16003_25930	PS16004_12795	PS16005_05370	PS184-R_19815	PS310-R_02730	PS378-R_20180	PS57-R_18830	RL316_22645	RL320_17085	RL97_25740	SA17021_06535	SA17022_19790	SA17023_18075	SA17024_10750	SA17101_21320	SB17032_22830	SB17033_16910	SB17034_05520	SB17035_12190	SB17036_25265	SB17037_08530	SB17038_08580	SB17039_15560	SB17040_15425	SB17042_11345
yceB		lipoprotein	46	46	1	99	669				560	560	560	2E151-R_03540	HBI01_23725	HBI05_14695	HBI04_12320	HBI02_00430	HBI03_02480	PS148-R_05300	PS15001_22345	PS15002_01545	PS16001_11770	PS16002_10020	PS16003_12340	PS16004_19700	PS16005_18540	PS184-R_06265	PS310-R_06570	PS378-R_04190	PS57-R_02410	RL316_24405	RL320_23130	RL97_06725	SA17021_00205	SA17022_08695	SA17023_02075	SA17024_16900	SA17101_02735	SB17032_04345	SB17033_02725	SB17034_19285	SB17035_05090	SB17036_20925	SB17037_02805	SB17038_12525	SB17039_23545	SB17040_18925	SB17042_09655
yfbV		UPF0208 membrane protein YfbV	46	46	1	99	10241				455	455	455	2E151-R_05070	HBI01_10850	HBI05_05360	HBI04_14595	HBI02_25740	HBI03_07155	PS148-R_03350	PS15001_14400	PS15002_03155	PS16001_03380	PS16002_11865	PS16003_06700	PS16004_01745	PS16005_14180	PS184-R_07100	PS310-R_08100	PS378-R_03350	PS57-R_04380	RL316_14650	RL320_08640	RL97_22020	SA17021_13280	SA17022_02720	SA17023_09915	SA17024_17895	SA17101_04390	SB17032_14075	SB17033_06805	SB17034_12725	SB17035_21250	SB17036_15280	SB17037_06235	SB17038_06220	SB17039_02645	SB17040_01740	SB17042_01475
dsbD		protein-disulfide reductase DsbD	46	46	1	99	7389				1697	1697	1697	2E151-R_22105	HBI01_12115	HBI05_20140	HBI04_19470	HBI02_03905	HBI03_09405	PS148-R_22410	PS15001_10885	PS15002_05935	PS16001_20815	PS16002_04340	PS16003_23035	PS16004_17825	PS16005_15235	PS184-R_22205	PS310-R_22780	PS378-R_22570	PS57-R_22570	RL316_08595	RL320_01975	RL97_15840	SA17021_06420	SA17022_11270	SA17023_14180	SA17024_23710	SA17101_08385	SB17032_22960	SB17033_09155	SB17034_07835	SB17035_00100	SB17036_24225	SB17037_04275	SB17038_13490	SB17039_07380	SB17040_07400	SB17042_14210
kdsC		3-deoxy-manno-octulosonate-8-phosphatase KdsC	46	46	1	99	9062				566	566	566	2E151-R_01670	HBI01_07290	HBI05_13580	HBI04_01950	HBI02_24585	HBI03_19075	PS148-R_00370	PS15001_07120	PS15002_22155	PS16001_10230	PS16002_26060	PS16003_02280	PS16004_03965	PS16005_08785	PS184-R_03105	PS310-R_04705	PS378-R_00370	PS57-R_00370	RL316_26510	RL320_23895	RL97_17380	SA17021_09420	SA17022_06155	SA17023_06465	SA17024_09515	SA17101_11395	SB17032_16665	SB17033_23115	SB17034_09970	SB17035_24400	SB17036_16290	SB17037_16700	SB17038_01685	SB17039_04995	SB17040_07870	SB17042_05385
yhcO		Uncharacterized protein YhcO	46	46	1	99	9026				272	272	272	2E151-R_01840	HBI01_07460	HBI05_13760	HBI04_19975	HBI02_03135	HBI03_13345	PS148-R_00200	PS15001_19955	PS15002_22325	PS16001_10400	PS16002_26230	PS16003_02450	PS16004_04135	PS16005_08955	PS184-R_02935	PS310-R_04875	PS378-R_00200	PS57-R_00200	RL316_26680	RL320_23725	RL97_17550	SA17021_09250	SA17022_06325	SA17023_06635	SA17024_09685	SA17101_11575	SB17032_16485	SB17033_22945	SB17034_09805	SB17035_24570	SB17036_16120	SB17037_16870	SB17038_01515	SB17039_05165	SB17040_07700	SB17042_05205
tehB		tellurite resistance methyltransferase TehB	46	46	1	99	3892				593	593	593	2E151-R_22705	HBI01_14615	HBI05_09575	HBI04_01135	HBI02_19365	HBI03_13230	PS148-R_22660	PS15001_24405	PS15002_19965	PS16001_05090	PS16002_19740	PS16003_18665	PS16004_25090	PS16005_25905	PS184-R_22805	PS310-R_23030	PS378-R_23170	PS57-R_22770	RL316_12685	RL320_18595	RL97_16010	SA17021_25715	SA17022_17515	SA17023_25830	SA17024_15835	SA17101_18645	SB17032_11330	SB17033_24760	SB17034_25020	SB17035_17695	SB17036_14280	SB17037_09880	SB17038_24895	SB17039_24320	SB17040_21610	SB17042_11540
mepA		penicillin-insensitive murein endopeptidase	46	46	1	99	555				824	824	824	2E151-R_05235	HBI01_11015	HBI05_05525	HBI04_14775	HBI02_25905	HBI03_16835	PS148-R_03515	PS15001_14235	PS15002_02990	PS16001_03545	PS16002_12030	PS16003_06865	PS16004_01580	PS16005_14345	PS184-R_06935	PS310-R_08265	PS378-R_03515	PS57-R_04215	RL316_14485	RL320_08805	RL97_22185	SA17021_13445	SA17022_02885	SA17023_10080	SA17024_18060	SA17101_04555	SB17032_14255	SB17033_06640	SB17034_12560	SB17035_21085	SB17036_15115	SB17037_06070	SB17038_06385	SB17039_09895	SB17040_01575	SB17042_01295
flgJ		flagellar assembly peptidoglycan hydrolase FlgJ	46	46	1	99	650				941	941	941	2E151-R_03630	HBI01_23635	HBI05_14785	HBI04_12230	HBI02_00340	HBI03_02390	PS148-R_05390	PS15001_22255	PS15002_01455	PS16001_11860	PS16002_09930	PS16003_12250	PS16004_19610	PS16005_21290	PS184-R_06355	PS310-R_06660	PS378-R_04100	PS57-R_02320	RL316_24315	RL320_23040	RL97_06815	SA17021_13985	SA17022_08605	SA17023_02165	SA17024_16990	SA17101_02825	SB17032_04435	SB17033_02635	SB17034_19195	SB17035_05180	SB17036_17545	SB17037_02715	SB17038_12435	SB17039_23635	SB17040_18835	SB17042_09745
ubiI		FAD-dependent 2-octaprenylphenol hydroxylase	46	46	1	99	7453				1202	1202	1202	2E151-R_15815	HBI01_15990	HBI05_10680	HBI04_00425	HBI02_23075	HBI03_17740	PS148-R_15535	PS15001_00435	PS15002_14375	PS16001_23950	PS16002_03905	PS16003_08510	PS16004_07365	PS16005_09515	PS184-R_15045	PS310-R_16930	PS378-R_15085	PS57-R_14640	RL316_19185	RL320_20550	RL97_24950	SA17021_20575	SA17022_12360	SA17023_03970	SA17024_24210	SA17101_07400	SB17032_05705	SB17033_14390	SB17034_16045	SB17035_18595	SB17036_05315	SB17037_12820	SB17038_10095	SB17039_04205	SB17040_10390	SB17042_22195
cydC		cysteine/glutathione ABC transporter ATP-binding protein/permease CydC	46	46	1	99	10052				1721	1721	1721	2E151-R_02750	HBI01_13335	HBI05_04750	HBI04_05280	HBI02_10500	HBI03_24565	PS148-R_04510	PS15001_23135	PS15002_02335	PS16001_05410	PS16002_10810	PS16003_14960	PS16004_14730	PS16005_02000	PS184-R_05475	PS310-R_05780	PS378-R_04980	PS57-R_03200	RL316_16785	RL320_14810	RL97_09380	SA17021_00820	SA17022_09485	SA17023_00585	SA17024_16110	SA17101_01880	SB17032_21055	SB17033_03515	SB17034_20075	SB17035_17425	SB17036_10785	SB17037_03595	SB17038_13315	SB17039_22755	SB17040_19715	SB17042_18580
yhiI		Uncharacterized protein YhiI	46	46	1	99	7027				1055	1067	1066	2E151-R_13645	HBI01_04145	HBI05_18135	HBI04_22300	HBI02_06745	HBI03_11525	PS148-R_13915	PS15001_02680	PS15002_23285	PS16001_14445	PS16002_18250	PS16003_12705	PS16004_18720	PS16005_05810	PS184-R_13210	PS310-R_15160	PS378-R_14375	PS57-R_12805	RL316_20285	RL320_14150	RL97_00760	SA17021_15670	SA17022_16905	SA17023_08445	SA17024_05100	SA17101_26385	SB17032_19470	SB17033_11610	SB17034_25600	SB17035_02730	SB17036_23315	SB17037_24775	SB17038_18040	SB17039_12165	SB17040_24995	SB17042_04185
yqjK		Uncharacterized protein YqjK	46	46	1	99	9159				299	299	299	2E151-R_01210	HBI01_06830	HBI05_22780	HBI04_24415	HBI02_11200	HBI03_05900	PS148-R_00830	PS15001_06660	PS15002_21695	PS16001_09770	PS16002_25600	PS16003_01820	PS16004_03505	PS16005_08325	PS184-R_03565	PS310-R_04245	PS378-R_00830	PS57-R_00830	RL316_26050	RL320_24355	RL97_16920	SA17021_09880	SA17022_05695	SA17023_06005	SA17024_09055	SA17101_10900	SB17032_17165	SB17033_23575	SB17034_06565	SB17035_23940	SB17036_09315	SB17037_16240	SB17038_02145	SB17039_15205	SB17040_08330	SB17042_05880
flgB		flagellar basal body rod protein FlgB	46	46	1	99	658				416	416	416	2E151-R_03590	HBI01_23675	HBI05_14745	HBI04_12270	HBI02_00380	HBI03_02430	PS148-R_05350	PS15001_22295	PS15002_01495	PS16001_11820	PS16002_09970	PS16003_12290	PS16004_19650	PS16005_21250	PS184-R_06315	PS310-R_06620	PS378-R_04140	PS57-R_02360	RL316_24355	RL320_23080	RL97_06775	SA17021_14025	SA17022_08645	SA17023_02125	SA17024_16950	SA17101_02785	SB17032_04395	SB17033_02675	SB17034_19235	SB17035_05140	SB17036_17505	SB17037_02755	SB17038_12475	SB17039_23595	SB17040_18875	SB17042_09705
hscB		co-chaperone HscB	46	46	1	99	296				515	515	515	2E151-R_14995	HBI01_20435	HBI05_06330	HBI04_23720	HBI02_10045	HBI03_09645	PS148-R_14410	PS15001_13375	PS15002_08825	PS16001_04405	PS16002_07895	PS16003_07730	PS16004_06895	PS16005_02745	PS184-R_14255	PS310-R_12110	PS378-R_11310	PS57-R_14155	RL316_09750	RL320_26125	RL97_11050	SA17021_03675	SA17022_03745	SA17023_20585	SA17024_02635	SA17101_05565	SB17032_15440	SB17033_07870	SB17034_11695	SB17035_20220	SB17036_04660	SB17037_05205	SB17038_07245	SB17039_09070	SB17040_00715	SB17042_00345
ispF		2-C-methyl-D-erythritol 2,4-cyclodiphosphate synthase	46	46	1	99	8100				479	479	479	2E151-R_16340	HBI01_08930	HBI05_15615	HBI04_19030	HBI02_17785	HBI03_18230	PS148-R_16055	PS15001_06020	PS15002_00415	PS16001_01630	PS16002_17580	PS16003_17925	PS16004_11615	PS16005_07385	PS184-R_15900	PS310-R_18115	PS378-R_15605	PS57-R_15495	RL316_18310	RL320_21430	RL97_14750	SA17021_19700	SA17022_08220	SA17023_15920	SA17024_25080	SA17101_06495	SB17032_01750	SB17033_13515	SB17034_15170	SB17035_19465	SB17036_06190	SB17037_19605	SB17038_10950	SB17039_06505	SB17040_11260	SB17042_17125
mtlD		mannitol-1-phosphate 5-dehydrogenase	46	46	1	99	7198				1148	1148	1148	2E151-R_07650	HBI01_10160	HBI05_16335	HBI04_13715	HBI02_12100	HBI03_12470	PS148-R_06110	PS15001_05420	PS15002_06525	PS16001_00995	PS16002_00710	PS16003_04050	PS16004_05325	PS16005_00435	PS184-R_09245	PS310-R_09550	PS378-R_08745	PS57-R_05975	RL316_02865	RL320_09630	RL97_24115	SA17021_15040	SA17022_00320	SA17023_15210	SA17024_04555	SA17101_08575	SB17032_18760	SB17033_01545	SB17034_02380	SB17035_05900	SB17036_00615	SB17037_21055	SB17038_21730	SB17039_02065	SB17040_04830	SB17042_19525
kbaZ		tagatose-bisphosphate aldolase subunit KbaZ	46	46	1	99	9131				1280	1280	1280	2E151-R_01335	HBI01_06955	HBI05_13235	HBI04_01615	HBI02_24240	HBI03_10140	PS148-R_00705	PS15001_06785	PS15002_21820	PS16001_09895	PS16002_25725	PS16003_01945	PS16004_03630	PS16005_08450	PS184-R_03440	PS310-R_04370	PS378-R_00705	PS57-R_00705	RL316_26175	RL320_24230	RL97_17045	SA17021_09755	SA17022_05820	SA17023_06130	SA17024_09180	SA17101_11040	SB17032_17025	SB17033_23450	SB17034_06440	SB17035_24065	SB17036_18665	SB17037_16365	SB17038_02020	SB17039_04660	SB17040_08205	SB17042_05740
emtA		membrane-bound lytic murein transglycosylase EmtA	46	46	1	99	6014				611	611	611	2E151-R_18910	HBI01_08490	HBI05_25045	HBI04_24850	HBI02_07240	HBI03_22320	PS148-R_18155	PS15001_04880	PS15002_19090	PS16001_25810	PS16002_08505	PS16003_16755	PS16004_00130	PS16005_04455	PS184-R_18000	PS310-R_15590	PS378-R_18205	PS57-R_17600	RL316_13705	RL320_25650	RL97_21850	SA17021_24685	SA17022_18540	SA17023_02615	SA17024_20700	SA17101_19730	SB17032_12345	SB17033_07360	SB17034_12955	SB17035_16380	SB17036_09570	SB17037_19100	SB17038_00340	SB17039_25345	SB17040_04065	SB17042_10200
dgcZ		diguanylate cyclase DgcZ	46	46	1	99	3326				890	890	890	2E151-R_07050	HBI01_00440	HBI05_03690	HBI04_06005	HBI02_06705	HBI03_00810	PS148-R_19800	PS15001_26055	PS15002_09260	PS16001_22835	PS16002_22385	PS16003_26195	PS16004_12530	PS16005_00580	PS184-R_19550	PS310-R_02990	PS378-R_19915	PS57-R_18565	RL316_22910	RL320_16820	RL97_25475	SA17021_06800	SA17022_19525	SA17023_17810	SA17024_10485	SA17101_25820	SB17032_25230	SB17033_16645	SB17034_18015	SB17035_11925	SB17036_15900	SB17037_08795	SB17038_08845	SB17039_15295	SB17040_15690	SB17042_26155
fepD		ferrienterobactin ABC transporter permease	46	46	1	99	1493				1004	1004	1004	2E151-R_17670	HBI01_21385	HBI05_02365	HBI04_06865	HBI02_20145	HBI03_05990	PS148-R_17420	PS15001_08985	PS15002_10540	PS16001_16270	PS16002_05990	PS16003_13605	PS16004_15825	PS16005_15075	PS184-R_17265	PS310-R_19440	PS378-R_16935	PS57-R_16830	RL316_07565	RL320_21855	RL97_19650	SA17021_02400	SA17022_07425	SA17023_13410	SA17024_02005	SA17101_23200	SB17032_17995	SB17033_05860	SB17034_21545	SB17035_07785	SB17036_01985	SB17037_12365	SB17038_03825	SB17039_10240	SB17040_21175	SB17042_06595
ligA		NAD-dependent DNA ligase LigA	46	46	1	99	460				2015	2015	2015	2E151-R_23975	HBI01_25685	HBI05_01160	HBI04_16685	HBI02_08495	HBI03_23570	PS148-R_23755	PS15001_13890	PS15002_08310	PS16001_03890	PS16002_06550	PS16003_07215	PS16004_01105	PS16005_10365	PS184-R_24375	PS310-R_11355	PS378-R_10555	PS57-R_23450	RL316_10265	RL320_26640	RL97_13130	SA17021_04190	SA17022_03230	SA17023_10425	SA17024_18405	SA17101_04975	SB17032_14850	SB17033_21665	SB17034_12210	SB17035_20735	SB17036_14770	SB17037_05720	SB17038_06730	SB17039_09550	SB17040_01230	SB17042_00935
lspA		signal peptidase II	46	46	1	99	8698				494	494	494	2E151-R_10460	HBI01_16830	HBI05_22890	HBI04_04235	HBI02_18835	HBI03_18610	PS148-R_07445	PS15001_20775	PS15002_25000	PS16001_13210	PS16002_23840	PS16003_11120	PS16004_23890	PS16005_24030	PS184-R_10025	PS310-R_10330	PS378-R_10170	PS57-R_07955	RL316_05970	RL320_04030	RL97_18285	SA17021_21085	SA17022_25540	SA17023_23640	SA17024_21895	SA17101_12635	SB17032_27945	SB17033_00990	SB17034_03800	SB17035_13625	SB17036_11800	SB17037_00695	SB17038_16830	SB17039_19205	SB17040_22875	SB17042_02885
sdaA		L-serine ammonia-lyase	46	46	1	99	9474				1364	1364	1364	2E151-R_05595	HBI01_19830	HBI05_24025	HBI04_17595	HBI02_22085	HBI03_16535	PS148-R_09955	PS15001_24600	PS15002_06895	PS16001_21375	PS16002_20920	PS16003_24735	PS16004_25675	PS16005_20445	PS184-R_01190	PS310-R_01535	PS378-R_07235	PS57-R_09485	RL316_21450	RL320_00105	RL97_03535	SA17021_08275	SA17022_20990	SA17023_19275	SA17024_11945	SA17101_00715	SB17032_20000	SB17033_25855	SB17034_04250	SB17035_08935	SB17036_19315	SB17037_07315	SB17038_19930	SB17039_16755	SB17040_14215	SB17042_13230
ygaY		Putative uncharacterized transporter YgaY	46	46	1	99	8024				1184	1184	1184	2E151-R_21900	HBI01_02945	HBI05_00140	HBI04_22125	HBI02_17450	HBI03_14165	PS148-R_21660	PS15001_10485	PS15002_17830	PS16001_26460	PS16002_07490	PS16003_24375	PS16004_10765	PS16005_02985	PS184-R_21810	PS310-R_22625	PS378-R_22365	PS57-R_21770	RL316_17890	RL320_05690	RL97_11775	SA17021_11025	SA17022_14860	SA17023_14495	SA17024_06160	SA17101_06135	SB17032_02080	SB17033_13095	SB17034_17655	SB17035_11665	SB17036_13285	SB17037_13995	SB17038_14525	SB17039_20895	SB17040_16625	SB17042_16795
glpG		rhomboid family intramembrane serine protease GlpG	46	46	1	99	6939				824	830	828	2E151-R_13995	HBI01_03795	HBI05_17890	HBI04_11470	HBI02_12980	HBI03_23390	PS148-R_13565	PS15001_03030	PS15002_22935	PS16001_14095	PS16002_18600	PS16003_13055	PS16004_13975	PS16005_06160	PS184-R_13560	PS310-R_14810	PS378-R_14025	PS57-R_13155	RL316_19935	RL320_13800	RL97_00410	SA17021_16020	SA17022_16555	SA17023_08095	SA17024_05450	SA17101_26715	SB17032_03635	SB17033_11260	SB17034_25950	SB17035_03080	SB17036_23665	SB17037_25125	SB17038_18390	SB17039_13705	SB17040_25345	SB17042_04640
torR		two-component system response regulator TorR	46	46	1	99	743				692	692	692	2E151-R_03210	HBI01_01855	HBI05_14385	HBI04_10675	HBI02_15440	HBI03_21555	PS148-R_04970	PS15001_22675	PS15002_01875	PS16001_18110	PS16002_10350	PS16003_15420	PS16004_20030	PS16005_18870	PS184-R_05935	PS310-R_06240	PS378-R_04520	PS57-R_02740	RL316_24735	RL320_23460	RL97_06395	SA17021_00360	SA17022_09025	SA17023_01745	SA17024_16570	SA17101_02435	SB17032_21860	SB17033_03055	SB17034_19615	SB17035_04760	SB17036_10325	SB17037_03135	SB17038_12855	SB17039_23215	SB17040_19255	SB17042_15150
gss		bifunctional glutathionylspermidine amidase/synthase	46	46	1	99	8431				1859	1859	1859	2E151-R_00585	HBI01_17485	HBI05_04395	HBI04_23000	HBI02_16580	HBI03_05540	PS148-R_01455	PS15001_09525	PS15002_21070	PS16001_09140	PS16002_24975	PS16003_01195	PS16004_04695	PS16005_07695	PS184-R_04190	PS310-R_03620	PS378-R_01455	PS57-R_01455	RL316_25425	RL320_24980	RL97_23565	SA17021_10505	SA17022_05070	SA17023_05380	SA17024_08430	SA17101_18440	SB17032_04975	SB17033_24200	SB17034_07190	SB17035_02120	SB17036_08690	SB17037_01605	SB17038_01105	SB17039_00855	SB17040_09510	SB17042_06430
xdhA		xanthine dehydrogenase molybdenum-binding subunit XdhA	46	46	1	99	7408				2297	2297	2297	2E151-R_15615	HBI01_15785	HBI05_10885	HBI04_21480	HBI02_23270	HBI03_08940	PS148-R_15335	PS15001_00230	PS15002_14170	PS16001_24150	PS16002_03705	PS16003_08310	PS16004_07165	PS16005_09720	PS184-R_15245	PS310-R_16730	PS378-R_14885	PS57-R_14840	RL316_18980	RL320_20755	RL97_05270	SA17021_20370	SA17022_12565	SA17023_03765	SA17024_24410	SA17101_07185	SB17032_01015	SB17033_14185	SB17034_15840	SB17035_18800	SB17036_05520	SB17037_12615	SB17038_10300	SB17039_05835	SB17040_10590	SB17042_12475
pxpB		5-oxoprolinase subunit PxpB	46	46	1	99	9834				656	656	656	2E151-R_19915	HBI01_20010	HBI05_19250	HBI04_06120	HBI02_11385	HBI03_16715	PS148-R_20120	PS15001_08405	PS15002_09960	PS16001_16925	PS16002_09455	PS16003_09285	PS16004_21050	PS16005_11125	PS184-R_19980	PS310-R_21575	PS378-R_20380	PS57-R_19560	RL316_08145	RL320_22435	RL97_02335	SA17021_01820	SA17022_06590	SA17023_12830	SA17024_01425	SA17101_20145	SB17032_17445	SB17033_05280	SB17034_20965	SB17035_07205	SB17036_12895	SB17037_11785	SB17038_03245	SB17039_21865	SB17040_20605	SB17042_07145
ycaP		UPF0702 transmembrane protein YcaP	46	46	1	99	842				692	692	692	2E151-R_02840	HBI01_01485	HBI05_04845	HBI04_00085	HBI02_18860	HBI03_21185	PS148-R_04600	PS15001_23045	PS15002_02245	PS16001_05320	PS16002_10720	PS16003_15050	PS16004_14640	PS16005_02090	PS184-R_05565	PS310-R_05870	PS378-R_04890	PS57-R_03110	RL316_16695	RL320_14720	RL97_07555	SA17021_00730	SA17022_09395	SA17023_16270	SA17024_16200	SA17101_01985	SB17032_21415	SB17033_03425	SB17034_19985	SB17035_04390	SB17036_10695	SB17037_03505	SB17038_13225	SB17039_22845	SB17040_19625	SB17042_15600
yfgH		Uncharacterized lipoprotein YfgH	46	46	1	99	368				515	515	515	2E151-R_14615	HBI01_20570	HBI05_11800	HBI04_03905	HBI02_26485	HBI03_23030	PS148-R_14790	PS15001_13510	PS15002_08690	PS16001_04270	PS16002_07760	PS16003_07595	PS16004_01485	PS16005_09985	PS184-R_14635	PS310-R_11730	PS378-R_10930	PS57-R_13775	RL316_09885	RL320_26260	RL97_11185	SA17021_03810	SA17022_03610	SA17023_22100	SA17024_17385	SA17101_05445	SB17032_15300	SB17033_08005	SB17034_11830	SB17035_20355	SB17036_04525	SB17037_05340	SB17038_07110	SB17039_08935	SB17040_00850	SB17042_00485
mog		molybdopterin adenylyltransferase	46	46	1	99	8677				587	587	587	2E151-R_10365	HBI01_16925	HBI05_19105	HBI04_24515	HBI02_15155	HBI03_19785	PS148-R_07350	PS15001_20680	PS15002_24905	PS16001_13305	PS16002_23935	PS16003_11025	PS16004_23985	PS16005_23935	PS184-R_09930	PS310-R_10235	PS378-R_10265	PS57-R_08050	RL316_05875	RL320_03935	RL97_18190	SA17021_20990	SA17022_25445	SA17023_23735	SA17024_21990	SA17101_12535	SB17032_28040	SB17033_01085	SB17034_03705	SB17035_13530	SB17036_11895	SB17037_00600	SB17038_16735	SB17039_19110	SB17040_22780	SB17042_02980
patD		aminobutyraldehyde dehydrogenase	46	46	1	99	3903				1424	1424	1424	2E151-R_22650	HBI01_14670	HBI05_09640	HBI04_01190	HBI02_19300	HBI03_13285	PS148-R_22605	PS15001_24460	PS15002_20020	PS16001_05145	PS16002_19685	PS16003_18720	PS16004_25035	PS16005_25850	PS184-R_22750	PS310-R_23085	PS378-R_23115	PS57-R_22715	RL316_12630	RL320_18540	RL97_15955	SA17021_25770	SA17022_17465	SA17023_25885	SA17024_15890	SA17101_18575	SB17032_11265	SB17033_24705	SB17034_25075	SB17035_17640	SB17036_14335	SB17037_09935	SB17038_24950	SB17039_18095	SB17040_21555	SB17042_11475
ispA		(2E,6E)-farnesyl diphosphate synthase	46	46	1	99	1968				899	899	899	2E151-R_12040	HBI01_14120	HBI05_12535	HBI04_08035	HBI02_25980	HBI03_02015	PS148-R_11760	PS15001_01380	PS15002_04495	PS16001_06590	PS16002_02085	PS16003_10395	PS16004_00635	PS16005_16960	PS184-R_11610	PS310-R_13010	PS378-R_12000	PS57-R_10155	RL316_00820	RL320_11130	RL97_14060	SA17021_04865	SA17022_23290	SA17023_10805	SA17024_07465	SA17101_14205	SB17032_13050	SB17033_09770	SB17034_08995	SB17035_08495	SB17036_06660	SB17037_23985	SB17038_25615	SB17039_11450	SB17040_00025	SB17042_14840
hybD		HyaD/HybD family hydrogenase maturation endopeptidase	46	46	1	99	9295				494	494	494	2E151-R_00615	HBI01_17455	HBI05_04430	HBI04_23030	HBI02_16550	HBI03_05570	PS148-R_01425	PS15001_09555	PS15002_21100	PS16001_09170	PS16002_25005	PS16003_01225	PS16004_04665	PS16005_07725	PS184-R_04160	PS310-R_03650	PS378-R_01425	PS57-R_01425	RL316_25455	RL320_24950	RL97_23535	SA17021_10475	SA17022_05100	SA17023_05410	SA17024_08460	SA17101_10355	SB17032_05005	SB17033_24170	SB17034_07160	SB17035_02150	SB17036_08720	SB17037_01575	SB17038_01075	SB17039_00825	SB17040_09540	SB17042_06400
argO		arginine exporter ArgO	46	46	1	99	7476				632	635	634	2E151-R_15900	HBI01_16075	HBI05_24450	HBI04_00505	HBI02_22965	HBI03_17650	PS148-R_15620	PS15001_00520	PS15002_14460	PS16001_23865	PS16002_03990	PS16003_08600	PS16004_07450	PS16005_09430	PS184-R_14960	PS310-R_17015	PS378-R_15170	PS57-R_14555	RL316_19270	RL320_20465	RL97_24865	SA17021_20660	SA17022_12275	SA17023_04055	SA17024_24125	SA17101_07510	SB17032_05605	SB17033_14475	SB17034_16130	SB17035_18510	SB17036_05230	SB17037_12905	SB17038_10010	SB17039_04290	SB17040_10305	SB17042_22290
yhiD		MgtC/SapB family protein	46	46	1	99	7068				575	575	575	2E151-R_13520	HBI01_04270	HBI05_03310	HBI04_01510	HBI02_26510	HBI03_15600	PS148-R_14040	PS15001_21850	PS15002_23410	PS16001_14570	PS16002_18125	PS16003_12580	PS16004_18595	PS16005_05685	PS184-R_13085	PS310-R_15285	PS378-R_14500	PS57-R_12680	RL316_20410	RL320_14275	RL97_00885	SA17021_15545	SA17022_17030	SA17023_25645	SA17024_04975	SA17101_26260	SB17032_19305	SB17033_11735	SB17034_25475	SB17035_02605	SB17036_23190	SB17037_24650	SB17038_17915	SB17039_12290	SB17040_04325	SB17042_04025
nimT		2-nitroimidazole transporter	46	46	1	99	9445				1181	1181	1181	2E151-R_05700	HBI01_19725	HBI05_23895	HBI04_17490	HBI02_21950	HBI03_08295	PS148-R_10060	PS15001_24705	PS15002_07000	PS16001_21480	PS16002_21025	PS16003_24840	PS16004_25780	PS16005_17385	PS184-R_01085	PS310-R_01640	PS378-R_07340	PS57-R_09380	RL316_21555	RL320_00210	RL97_03640	SA17021_08170	SA17022_20885	SA17023_19170	SA17024_11840	SA17101_22175	SB17032_20130	SB17033_25750	SB17034_04145	SB17035_08830	SB17036_19210	SB17037_07420	SB17038_20035	SB17039_16650	SB17040_14320	SB17042_10490
yfbR		5'-deoxynucleotidase	46	46	1	99	10245				599	599	599	2E151-R_05050	HBI01_10830	HBI05_05340	HBI04_14575	HBI02_25720	HBI03_07135	PS148-R_03330	PS15001_14420	PS15002_03175	PS16001_03360	PS16002_11845	PS16003_06680	PS16004_01765	PS16005_14160	PS184-R_07120	PS310-R_08080	PS378-R_03330	PS57-R_04400	RL316_14670	RL320_08620	RL97_22000	SA17021_13260	SA17022_02700	SA17023_09895	SA17024_17875	SA17101_04370	SB17032_14055	SB17033_06825	SB17034_12745	SB17035_21270	SB17036_15300	SB17037_06255	SB17038_06200	SB17039_02665	SB17040_01760	SB17042_01495
wcaG		Nucleoside-diphosphate-sugar epimerase	46	46	1	99	8419				914	914	914	2E151-R_00525	HBI01_17545	HBI05_04335	HBI04_25955	HBI02_16640	HBI03_09500	PS148-R_01515	PS15001_09465	PS15002_21010	PS16001_09080	PS16002_24915	PS16003_01135	PS16004_04755	PS16005_07635	PS184-R_04250	PS310-R_03560	PS378-R_01515	PS57-R_01515	RL316_25365	RL320_25040	RL97_23625	SA17021_10565	SA17022_05010	SA17023_05320	SA17024_08370	SA17101_18380	SB17032_04915	SB17033_24260	SB17034_07250	SB17035_02060	SB17036_08630	SB17037_01665	SB17038_01165	SB17039_00915	SB17040_09450	SB17042_06490
nudL		CoA pyrophosphatase	46	46	1	99	9473				578	578	578	2E151-R_05600	HBI01_19825	HBI05_24020	HBI04_17590	HBI02_22080	HBI03_16530	PS148-R_09960	PS15001_24605	PS15002_06900	PS16001_21380	PS16002_20925	PS16003_24740	PS16004_25680	PS16005_20440	PS184-R_01185	PS310-R_01540	PS378-R_07240	PS57-R_09480	RL316_21455	RL320_00110	RL97_03540	SA17021_08270	SA17022_20985	SA17023_19270	SA17024_11940	SA17101_00720	SB17032_20005	SB17033_25850	SB17034_04245	SB17035_08930	SB17036_19310	SB17037_07320	SB17038_19935	SB17039_16750	SB17040_14220	SB17042_13225
argT		lysine/arginine/ornithine ABC transporter substrate-binding protein ArgT	46	46	1	99	10225				782	782	782	2E151-R_05140	HBI01_10920	HBI05_05435	HBI04_14670	HBI02_25815	HBI03_07225	PS148-R_03420	PS15001_14330	PS15002_03085	PS16001_03450	PS16002_11935	PS16003_06770	PS16004_01675	PS16005_14250	PS184-R_07030	PS310-R_08170	PS378-R_03420	PS57-R_04310	RL316_14580	RL320_08710	RL97_22090	SA17021_13350	SA17022_02790	SA17023_09985	SA17024_17965	SA17101_04465	SB17032_14150	SB17033_06735	SB17034_12655	SB17035_21180	SB17036_15210	SB17037_06165	SB17038_06290	SB17039_02575	SB17040_01670	SB17042_01400
zapD		cell division protein ZapD	46	46	1	99	8871				743	743	743	2E151-R_10890	HBI01_16395	HBI05_11125	HBI04_20140	HBI02_07650	HBI03_14240	PS148-R_07880	PS15001_12415	PS15002_25430	PS16001_12775	PS16002_23405	PS16003_11555	PS16004_23455	PS16005_24465	PS184-R_10460	PS310-R_10760	PS378-R_09735	PS57-R_07520	RL316_06400	RL320_04465	RL97_18715	SA17021_21520	SA17022_25975	SA17023_23205	SA17024_21460	SA17101_13035	SB17032_27515	SB17033_00555	SB17034_00355	SB17035_14060	SB17036_11360	SB17037_01130	SB17038_17270	SB17039_19640	SB17040_23310	SB17042_02460
msrB		Peptide methionine sulfoxide reductase MsrB	46	46	1	99	9432				413	413	413	2E151-R_05760	HBI01_19665	HBI05_23835	HBI04_12890	HBI02_21890	HBI03_00640	PS148-R_10120	PS15001_24765	PS15002_07060	PS16001_21540	PS16002_21085	PS16003_24900	PS16004_25840	PS16005_21565	PS184-R_01025	PS310-R_01700	PS378-R_07400	PS57-R_09320	RL316_21615	RL320_00270	RL97_03700	SA17021_08110	SA17022_20825	SA17023_19110	SA17024_11780	SA17101_22110	SB17032_20190	SB17033_25690	SB17034_04085	SB17035_08770	SB17036_19150	SB17037_07480	SB17038_20095	SB17039_16590	SB17040_14380	SB17042_10550
yhdP		AsmA2 domain-containing protein YhdP	46	46	1	99	9020				3800	3800	3800	2E151-R_01870	HBI01_07490	HBI05_13790	HBI04_20005	HBI02_03105	HBI03_13375	PS148-R_00170	PS15001_19985	PS15002_22355	PS16001_10430	PS16002_26260	PS16003_02480	PS16004_04165	PS16005_08985	PS184-R_02905	PS310-R_04905	PS378-R_00170	PS57-R_00170	RL316_26710	RL320_23695	RL97_17580	SA17021_09220	SA17022_06355	SA17023_06665	SA17024_09715	SA17101_11605	SB17032_16455	SB17033_22915	SB17034_09775	SB17035_24600	SB17036_16090	SB17037_16900	SB17038_01485	SB17039_05195	SB17040_07670	SB17042_05175
gstA		glutathione transferase GstA	46	46	1	99	3039				605	605	605	2E151-R_06755	HBI01_03225	HBI05_23545	HBI04_08975	HBI02_09005	HBI03_10430	PS148-R_11115	PS15001_25760	PS15002_08055	PS16001_22535	PS16002_22080	PS16003_25895	PS16004_12830	PS16005_05405	PS184-R_00030	PS310-R_02695	PS378-R_17320	PS57-R_08325	RL316_22610	RL320_17120	RL97_25775	SA17021_07595	SA17022_19830	SA17023_18110	SA17024_10785	SA17101_21360	SB17032_20955	SB17033_16945	SB17034_05555	SB17035_12225	SB17036_25300	SB17037_08495	SB17038_08545	SB17039_15595	SB17040_15390	SB17042_11305
fucK		L-fuculokinase	46	46	1	99	7716				1418	1418	1418	2E151-R_16620	HBI01_09210	HBI05_20890	HBI04_20985	HBI02_26860	HBI03_24425	PS148-R_15775	PS15001_06300	PS15002_00135	PS16001_01910	PS16002_17860	PS16003_18205	PS16004_20140	PS16005_07105	PS184-R_15620	PS310-R_18395	PS378-R_15885	PS57-R_15215	RL316_18590	RL320_21150	RL97_15030	SA17021_19980	SA17022_07940	SA17023_16200	SA17024_24800	SA17101_06800	SB17032_01440	SB17033_13795	SB17034_15450	SB17035_19185	SB17036_05910	SB17037_19325	SB17038_10670	SB17039_06225	SB17040_10980	SB17042_12905
slyX		Protein SlyX	46	46	1	99	6861				218	218	218	2E151-R_14345	HBI01_22625	HBI05_17530	HBI04_11110	HBI02_12195	HBI03_19280	PS148-R_13215	PS15001_11650	PS15002_22585	PS16001_13745	PS16002_18950	PS16003_13405	PS16004_14325	PS16005_06510	PS184-R_13910	PS310-R_14460	PS378-R_13675	PS57-R_13505	RL316_19585	RL320_13450	RL97_01040	SA17021_16370	SA17022_16205	SA17023_07745	SA17024_05800	SA17101_15005	SB17032_03985	SB17033_10910	SB17034_16490	SB17035_03430	SB17036_24015	SB17037_25475	SB17038_18740	SB17039_13355	SB17040_25695	SB17042_04990
anmK		anhydro-N-acetylmuramic acid kinase	46	46	1	99	3034				1109	1109	1109	2E151-R_06730	HBI01_03200	HBI05_23520	HBI04_08950	HBI02_08980	HBI03_10405	PS148-R_11090	PS15001_25735	PS15002_08030	PS16001_22510	PS16002_22055	PS16003_25870	PS16004_12855	PS16005_05430	PS184-R_00055	PS310-R_02670	PS378-R_17345	PS57-R_08350	RL316_22585	RL320_17145	RL97_25800	SA17021_07570	SA17022_19855	SA17023_18135	SA17024_10810	SA17101_21385	SB17032_20930	SB17033_16970	SB17034_05580	SB17035_12250	SB17036_25325	SB17037_08470	SB17038_08520	SB17039_15620	SB17040_15365	SB17042_11280
rstB		two-component system sensor histidine kinase RstB	46	46	1	99	3070				1301	1301	1301	2E151-R_06885	HBI01_00610	HBI05_04170	HBI04_05815	HBI02_09140	HBI03_12805	PS148-R_19635	PS15001_25890	PS15002_09090	PS16001_22665	PS16002_22210	PS16003_26025	PS16004_12700	PS16005_05275	PS184-R_19720	PS310-R_02825	PS378-R_20085	PS57-R_18735	RL316_22740	RL320_16990	RL97_25645	SA17021_06630	SA17022_19695	SA17023_17980	SA17024_10655	SA17101_21225	SB17032_22730	SB17033_16815	SB17034_05425	SB17035_12095	SB17036_25170	SB17037_08625	SB17038_08675	SB17039_15465	SB17040_15520	SB17042_22830
nanK		N-acetylmannosamine kinase	46	46	1	99	9043				356	875	863	2E151-R_01760	HBI01_07380	HBI05_13675	HBI04_02040	HBI02_24680	HBI03_19165	PS148-R_00280	PS15001_07210	PS15002_22245	PS16001_10320	PS16002_26150	PS16003_02370	PS16004_04055	PS16005_08875	PS184-R_03015	PS310-R_04795	PS378-R_00280	PS57-R_00280	RL316_26600	RL320_23805	RL97_17470	SA17021_09330	SA17022_06245	SA17023_06555	SA17024_09605	SA17101_11490	SB17032_16570	SB17033_23025	SB17034_10060	SB17035_24490	SB17036_16200	SB17037_16790	SB17038_01595	SB17039_05085	SB17040_07780	SB17042_05290
yhgN		NAAT family transporter YhgN	46	46	1	99	6957				593	593	593	2E151-R_13930	HBI01_03860	HBI05_17980	HBI04_18815	HBI02_20580	HBI03_14610	PS148-R_13630	PS15001_02965	PS15002_23000	PS16001_14160	PS16002_18535	PS16003_12990	PS16004_19005	PS16005_06095	PS184-R_13495	PS310-R_14875	PS378-R_14090	PS57-R_13090	RL316_20000	RL320_13865	RL97_00475	SA17021_15955	SA17022_16620	SA17023_08160	SA17024_05385	SA17101_26645	SB17032_03565	SB17033_11325	SB17034_25885	SB17035_03015	SB17036_23600	SB17037_25060	SB17038_18325	SB17039_13770	SB17040_25280	SB17042_04570
ybiI		C4-type zinc finger protein YbiI	46	46	1	99	9957				266	266	266	2E151-R_02325	HBI01_12910	HBI05_07475	HBI04_26305	HBI02_23960	HBI03_09275	PS148-R_04085	PS15001_23560	PS15002_02760	PS16001_05835	PS16002_11235	PS16003_14535	PS16004_19115	PS16005_17415	PS184-R_05050	PS310-R_05355	PS378-R_05405	PS57-R_03625	RL316_17210	RL320_15235	RL97_08955	SA17021_01245	SA17022_09910	SA17023_00160	SA17024_00960	SA17101_20630	SB17032_06525	SB17033_04815	SB17034_20500	SB17035_06740	SB17036_04185	SB17037_04020	SB17038_02780	SB17039_22330	SB17040_20140	SB17042_07685
tatB		Sec-independent protein translocase protein TatB	46	46	1	99	4353				515	515	515	2E151-R_18090	HBI01_22875	HBI05_20460	HBI04_00795	HBI02_20015	HBI03_13675	PS148-R_18455	PS15001_24225	PS15002_23580	PS16001_24625	PS16002_24245	PS16003_26500	PS16004_22055	PS16005_26085	PS184-R_18300	PS310-R_20305	PS378-R_19120	PS57-R_17900	RL316_08440	RL320_08945	RL97_11430	SA17021_26375	SA17022_13645	SA17023_22765	SA17024_13340	SA17101_09730	SB17032_00425	SB17033_20215	SB17034_22390	SB17035_25710	SB17036_16625	SB17037_23015	SB17038_15310	SB17039_14505	SB17040_12175	SB17042_17265
napD		chaperone NapD	46	46	1	99	10347				263	263	263	2E151-R_04610	HBI01_18050	HBI05_21705	HBI04_17430	HBI02_09450	HBI03_11225	PS148-R_02890	PS15001_14860	PS15002_03615	PS16001_02920	PS16002_15225	PS16003_06240	PS16004_02605	PS16005_14875	PS184-R_07560	PS310-R_07640	PS378-R_02890	PS57-R_04840	RL316_15110	RL320_13070	RL97_05540	SA17021_13215	SA17022_02260	SA17023_09455	SA17024_14640	SA17101_03985	SB17032_24015	SB17033_18605	SB17034_18595	SB17035_21710	SB17036_02950	SB17037_06695	SB17038_05760	SB17039_03105	SB17040_02200	SB17042_07920
asmA		outer membrane assembly protein AsmA	46	46	1	99	1227				1853	1853	1853	2E151-R_24385	HBI01_18800	HBI05_04615	HBI04_12060	HBI02_04490	HBI03_15375	PS148-R_02135	PS15001_15610	PS15002_13320	PS16001_02165	PS16002_15980	PS16003_05485	PS16004_05040	PS16005_11400	PS184-R_24635	PS310-R_24355	PS378-R_02135	PS57-R_24310	RL316_15860	RL320_12235	RL97_24575	SA17021_12465	SA17022_01510	SA17023_08695	SA17024_19560	SA17101_17535	SB17032_24790	SB17033_19360	SB17034_14855	SB17035_22460	SB17036_03700	SB17037_20190	SB17038_05005	SB17039_03860	SB17040_02955	SB17042_08705
glcE		glycolate oxidase subunit GlcE	46	46	1	99	8414				1052	1052	1052	2E151-R_00500	HBI01_17570	HBI05_04310	HBI04_25565	HBI02_21665	HBI03_01425	PS148-R_01540	PS15001_09440	PS15002_20985	PS16001_09055	PS16002_24890	PS16003_01110	PS16004_04780	PS16005_07610	PS184-R_04275	PS310-R_03535	PS378-R_01540	PS57-R_01540	RL316_25340	RL320_25065	RL97_23650	SA17021_10590	SA17022_04985	SA17023_05295	SA17024_08345	SA17101_18355	SB17032_04890	SB17033_24285	SB17034_07275	SB17035_02035	SB17036_08605	SB17037_01690	SB17038_01190	SB17039_00940	SB17040_09425	SB17042_06515
glcA		glycolate permease GlcA	46	46	1	99	8410				1664	1682	1681	2E151-R_00475	HBI01_17595	HBI05_04285	HBI04_25590	HBI02_21690	HBI03_01230	PS148-R_01565	PS15001_09415	PS15002_20960	PS16001_09030	PS16002_24865	PS16003_01085	PS16004_04805	PS16005_07585	PS184-R_04300	PS310-R_03510	PS378-R_01565	PS57-R_01565	RL316_25315	RL320_25090	RL97_23675	SA17021_10615	SA17022_04960	SA17023_05270	SA17024_08320	SA17101_18330	SB17032_04865	SB17033_24310	SB17034_07300	SB17035_02010	SB17036_08580	SB17037_01715	SB17038_01215	SB17039_00965	SB17040_09400	SB17042_06540
ucpA		SDR family oxidoreductase UcpA	46	46	1	99	446				791	791	791	2E151-R_24045	HBI01_25615	HBI05_01230	HBI04_16755	HBI02_08425	HBI03_23640	PS148-R_23685	PS15001_13820	PS15002_08380	PS16001_03960	PS16002_06620	PS16003_07285	PS16004_01175	PS16005_10295	PS184-R_24305	PS310-R_11425	PS378-R_10625	PS57-R_23520	RL316_10195	RL320_26570	RL97_13200	SA17021_04120	SA17022_03300	SA17023_10495	SA17024_18475	SA17101_05045	SB17032_14920	SB17033_21595	SB17034_12140	SB17035_20665	SB17036_14700	SB17037_05650	SB17038_06800	SB17039_09480	SB17040_01160	SB17042_00865
lptD		LPS assembly protein LptD	46	46	1	99	8925				2321	2354	2353	2E151-R_10615	HBI01_16670	HBI05_11385	HBI04_04685	HBI02_18690	HBI03_05070	PS148-R_07605	PS15001_20935	PS15002_25155	PS16001_13050	PS16002_23680	PS16003_11280	PS16004_23730	PS16005_24190	PS184-R_10185	PS310-R_10485	PS378-R_10010	PS57-R_07795	RL316_06125	RL320_04190	RL97_18440	SA17021_21245	SA17022_25700	SA17023_23480	SA17024_21735	SA17101_12780	SB17032_27785	SB17033_00830	SB17034_00080	SB17035_13785	SB17036_11640	SB17037_00855	SB17038_16990	SB17039_19365	SB17040_23035	SB17042_02730
yrbL		PhoP regulatory network protein YrbL	46	46	1	99	9053				632	632	632	2E151-R_01715	HBI01_07335	HBI05_13625	HBI04_01995	HBI02_24630	HBI03_19120	PS148-R_00325	PS15001_07165	PS15002_22200	PS16001_10275	PS16002_26105	PS16003_02325	PS16004_04010	PS16005_08830	PS184-R_03060	PS310-R_04750	PS378-R_00325	PS57-R_00325	RL316_26555	RL320_23850	RL97_17425	SA17021_09375	SA17022_06200	SA17023_06510	SA17024_09560	SA17101_11440	SB17032_16620	SB17033_23070	SB17034_10015	SB17035_24445	SB17036_16245	SB17037_16745	SB17038_01640	SB17039_05040	SB17040_07825	SB17042_05340
wcaA		colanic acid biosynthesis glycosyltransferase WcaA	46	46	1	99	1222				839	839	839	2E151-R_24360	HBI01_18825	HBI05_04640	HBI04_18870	HBI02_04525	HBI03_09875	PS148-R_02110	PS15001_15635	PS15002_13345	PS16001_02140	PS16002_16005	PS16003_05460	PS16004_05015	PS16005_11425	PS184-R_24660	PS310-R_24330	PS378-R_02110	PS57-R_24335	RL316_15885	RL320_12210	RL97_03315	SA17021_12440	SA17022_01485	SA17023_08670	SA17024_19535	SA17101_17510	SB17032_24815	SB17033_19385	SB17034_14880	SB17035_22485	SB17036_03725	SB17037_20165	SB17038_04980	SB17039_03885	SB17040_02980	SB17042_08730
ymdB		O-acetyl-ADP-ribose deacetylase	46	46	1	99	687				533	533	533	2E151-R_03450	HBI01_23815	HBI05_14605	HBI04_23460	HBI02_21365	HBI03_23130	PS148-R_05210	PS15001_22435	PS15002_01635	PS16001_17875	PS16002_10110	PS16003_12430	PS16004_19790	PS16005_18630	PS184-R_06175	PS310-R_06480	PS378-R_04280	PS57-R_02500	RL316_24495	RL320_23220	RL97_06635	SA17021_00115	SA17022_08785	SA17023_01985	SA17024_16810	SA17101_02645	SB17032_04255	SB17033_02815	SB17034_19375	SB17035_05000	SB17036_10085	SB17037_02895	SB17038_12615	SB17039_23455	SB17040_19015	SB17042_09565
hycA		formate hydrogenlyase regulator HycA	46	46	1	99	8072				461	461	461	2E151-R_16150	HBI01_08795	HBI05_15505	HBI04_21185	HBI02_17675	HBI03_10795	PS148-R_16245	PS15001_10260	PS15002_18055	PS16001_01445	PS16002_15050	PS16003_24600	PS16004_18415	PS16005_11630	PS184-R_16085	PS310-R_17930	PS378-R_15420	PS57-R_15685	RL316_18120	RL320_05460	RL97_11540	SA17021_10800	SA17022_15095	SA17023_14725	SA17024_05930	SA17101_06365	SB17032_01855	SB17033_13325	SB17034_14170	SB17035_22745	SB17036_13050	SB17037_14230	SB17038_14760	SB17039_20660	SB17040_16390	SB17042_17020
mlrA		HTH-type transcriptional regulator MlrA	46	46	1	99	12				731	731	731	2E151-R_04195	HBI01_18465	HBI05_09775	HBI04_17020	HBI02_06050	HBI03_06095	PS148-R_02475	PS15001_15275	PS15002_04030	PS16001_02505	PS16002_15645	PS16003_05825	PS16004_03020	PS16005_19230	PS184-R_07975	PS310-R_07225	PS378-R_02475	PS57-R_05255	RL316_15525	RL320_12575	RL97_05955	SA17021_12800	SA17022_01845	SA17023_09035	SA17024_19895	SA17101_03585	SB17032_24425	SB17033_19020	SB17034_14520	SB17035_22125	SB17036_03365	SB17037_07110	SB17038_05345	SB17039_03520	SB17040_02615	SB17042_08330
flgM		flagellar biosynthesis anti-sigma factor FlgM	46	46	1	99	660				293	293	293	2E151-R_03580	HBI01_23685	HBI05_14735	HBI04_12280	HBI02_00390	HBI03_02440	PS148-R_05340	PS15001_22305	PS15002_01505	PS16001_11810	PS16002_09980	PS16003_12300	PS16004_19660	PS16005_21240	PS184-R_06305	PS310-R_06610	PS378-R_04150	PS57-R_02370	RL316_24365	RL320_23090	RL97_06765	SA17021_14035	SA17022_08655	SA17023_02115	SA17024_16940	SA17101_02775	SB17032_04385	SB17033_02685	SB17034_19245	SB17035_05130	SB17036_17495	SB17037_02765	SB17038_12485	SB17039_23585	SB17040_18885	SB17042_09695
serB		phosphoserine phosphatase	46	46	1	99	8651				968	968	968	2E151-R_10250	HBI01_17040	HBI05_18985	HBI04_22700	HBI02_15015	HBI03_09105	PS148-R_07235	PS15001_20565	PS15002_24790	PS16001_13420	PS16002_24050	PS16003_10910	PS16004_24100	PS16005_23820	PS184-R_09815	PS310-R_10120	PS378-R_10380	PS57-R_08165	RL316_05760	RL320_03820	RL97_04465	SA17021_20875	SA17022_25330	SA17023_23850	SA17024_22105	SA17101_25275	SB17032_28165	SB17033_04345	SB17034_03590	SB17035_13415	SB17036_12010	SB17037_00485	SB17038_16620	SB17039_18995	SB17040_22665	SB17042_03100
yhbS		Uncharacterized N-acetyltransferase YhbS	46	46	1	99	9104				503	503	503	2E151-R_01445	HBI01_07065	HBI05_13345	HBI04_01725	HBI02_24350	HBI03_13000	PS148-R_00595	PS15001_06895	PS15002_21930	PS16001_10005	PS16002_25835	PS16003_02055	PS16004_03740	PS16005_08560	PS184-R_03330	PS310-R_04480	PS378-R_00595	PS57-R_00595	RL316_26285	RL320_24120	RL97_17155	SA17021_09645	SA17022_05930	SA17023_06240	SA17024_09290	SA17101_11170	SB17032_16890	SB17033_23340	SB17034_06330	SB17035_24175	SB17036_16515	SB17037_16475	SB17038_01910	SB17039_04770	SB17040_08095	SB17042_05610
glpT		glycerol-3-phosphate transporter	46	46	1	99	10301				1358	1358	1358	2E151-R_04790	HBI01_24870	HBI05_21495	HBI04_22540	HBI02_25470	HBI03_02730	PS148-R_03070	PS15001_14680	PS15002_03435	PS16001_03100	PS16002_11585	PS16003_06420	PS16004_02425	PS16005_18205	PS184-R_07380	PS310-R_07820	PS378-R_03070	PS57-R_04660	RL316_14930	RL320_13250	RL97_13550	SA17021_22715	SA17022_02440	SA17023_09635	SA17024_14460	SA17101_04145	SB17032_13805	SB17033_12095	SB17034_18775	SB17035_21530	SB17036_15560	SB17037_06515	SB17038_05940	SB17039_02925	SB17040_02020	SB17042_01740
bhsA		multiple stress resistance protein BhsA	46	46	1	99	2737				257	257	257	2E151-R_03785	HBI01_23480	HBI05_14950	HBI04_20840	HBI02_25330	HBI03_17340	PS148-R_05545	PS15001_22100	PS15002_01300	PS16001_12015	PS16002_09775	PS16003_15885	PS16004_17530	PS16005_21445	PS184-R_06510	PS310-R_06815	PS378-R_03945	PS57-R_02165	RL316_24160	RL320_22885	RL97_06970	SA17021_13830	SA17022_08450	SA17023_02320	SA17024_17150	SA17101_02985	SB17032_04590	SB17033_12305	SB17034_19040	SB17035_05335	SB17036_17700	SB17037_10120	SB17038_12280	SB17039_04060	SB17040_18680	SB17042_09900
atpH		F0F1 ATP synthase subunit delta	46	46	1	99	4679				533	533	533	2E151-R_08540	HBI01_09930	HBI05_22220	HBI04_23280	HBI02_16945	HBI03_02590	PS148-R_07000	PS15001_11150	PS15002_15250	PS16001_00105	PS16002_01600	PS16003_24050	PS16004_09320	PS16005_01810	PS184-R_08355	PS310-R_08660	PS378-R_07855	PS57-R_06865	RL316_01520	RL320_07345	RL97_07990	SA17021_14150	SA17022_01210	SA17023_05075	SA17024_03665	SA17101_00920	SB17032_12745	SB17033_02435	SB17034_13365	SB17035_10315	SB17036_01505	SB17037_21945	SB17038_11515	SB17039_01175	SB17040_05720	SB17042_15730
ybhJ		hydratase	46	46	1	99	9917				1370	2261	2227	2E151-R_02160	HBI01_04995	HBI05_07650	HBI04_26470	HBI02_11045	HBI03_24410	PS148-R_03920	PS15001_12030	PS15002_09675	PS16001_16630	PS16002_09155	PS16003_09585	PS16004_13640	PS16005_10825	PS184-R_04885	PS310-R_05190	PS378-R_05570	PS57-R_03790	RL316_17375	RL320_15400	RL97_08790	SA17021_01520	SA17022_06890	SA17023_12530	SA17024_01125	SA17101_20450	SB17032_06345	SB17033_04980	SB17034_20665	SB17035_06905	SB17036_04020	SB17037_04185	SB17038_02945	SB17039_22165	SB17040_20305	SB17042_07505
grxC		glutaredoxin 3	46	46	1	99	6662				251	251	251	2E151-R_07715	HBI01_10095	HBI05_10080	HBI04_20395	HBI02_13140	HBI03_21035	PS148-R_06175	PS15001_05485	PS15002_06460	PS16001_00930	PS16002_00775	PS16003_03985	PS16004_05260	PS16005_00500	PS184-R_09180	PS310-R_09485	PS378-R_08680	PS57-R_06040	RL316_02930	RL320_09565	RL97_14605	SA17021_14975	SA17022_00385	SA17023_15275	SA17024_04490	SA17101_08510	SB17032_18680	SB17033_01610	SB17034_02315	SB17035_05965	SB17036_00680	SB17037_21120	SB17038_21665	SB17039_02000	SB17040_04895	SB17042_19470
hisC		histidinol-phosphate transaminase	46	46	1	99	9781				1070	1070	1070	2E151-R_08715	HBI01_05555	HBI05_11665	HBI04_26020	HBI02_00220	HBI03_02850	PS148-R_08485	PS15001_19835	PS15002_10915	PS16001_17425	PS16002_14070	PS16003_16125	PS16004_08340	PS16005_13535	PS184-R_02665	PS310-R_00055	PS378-R_05755	PS57-R_20135	RL316_04625	RL320_06895	RL97_25005	SA17021_03290	SA17022_22470	SA17023_15755	SA17024_26390	SA17101_17250	SB17032_29020	SB17033_14810	SB17034_10640	SB17035_18120	SB17036_02555	SB17037_26100	SB17038_22880	SB17039_23835	SB17040_12735	SB17042_08925
group_10402	gudD	glucarate dehydratase	46	46	1	99	7732				1340	1340	1340	2E151-R_16535	HBI01_09125	HBI05_20805	HBI04_20745	HBI02_26945	HBI03_12595	PS148-R_15860	PS15001_06215	PS15002_00220	PS16001_01825	PS16002_17775	PS16003_18120	PS16004_11420	PS16005_07190	PS184-R_15705	PS310-R_18310	PS378-R_15800	PS57-R_15300	RL316_18505	RL320_21235	RL97_14945	SA17021_19895	SA17022_08025	SA17023_16115	SA17024_24885	SA17101_06715	SB17032_01525	SB17033_13710	SB17034_15365	SB17035_19270	SB17036_05995	SB17037_19410	SB17038_10755	SB17039_06310	SB17040_11065	SB17042_12990
dinF		MATE family efflux transporter DinF	46	46	1	99	2529				1325	1325	1325	2E151-R_21290	HBI01_22320	HBI05_19635	HBI04_06650	HBI02_14505	HBI03_06270	PS148-R_21530	PS15001_02575	PS15002_12540	PS16001_08265	PS16002_02915	PS16003_04720	PS16004_17275	PS16005_12430	PS184-R_21240	PS310-R_21160	PS378-R_21755	PS57-R_21200	RL316_23690	RL320_06535	RL97_22805	SA17021_11850	SA17022_04285	SA17023_00955	SA17024_03330	SA17101_07910	SB17032_09890	SB17033_08785	SB17034_01190	SB17035_11245	SB17036_07905	SB17037_14510	SB17038_09515	SB17039_08035	SB17040_06390	SB17042_17870
yfaE		ferredoxin-like diferric-tyrosyl radical cofactor maintenance protein YfaE	46	46	1	99	10311				254	254	254	2E151-R_04775	HBI01_24885	HBI05_21530	HBI04_22555	HBI02_25435	HBI03_02745	PS148-R_03055	PS15001_14695	PS15002_03450	PS16001_03085	PS16002_11570	PS16003_06405	PS16004_02440	PS16005_18190	PS184-R_07395	PS310-R_07805	PS378-R_03055	PS57-R_04675	RL316_14945	RL320_13235	RL97_13565	SA17021_22700	SA17022_02425	SA17023_09620	SA17024_14475	SA17101_04125	SB17032_13770	SB17033_12110	SB17034_18760	SB17035_21545	SB17036_15575	SB17037_06530	SB17038_05925	SB17039_02940	SB17040_02035	SB17042_01775
rihB		ribosylpyrimidine nucleosidase	46	46	1	99	48				941	941	941	2E151-R_04375	HBI01_18285	HBI05_09955	HBI04_17205	HBI02_06230	HBI03_10995	PS148-R_02655	PS15001_15095	PS15002_03850	PS16001_02685	PS16002_15465	PS16003_06005	PS16004_02840	PS16005_14640	PS184-R_07795	PS310-R_07405	PS378-R_02655	PS57-R_05075	RL316_15345	RL320_12755	RL97_05775	SA17021_12980	SA17022_02025	SA17023_09215	SA17024_20075	SA17101_03765	SB17032_24240	SB17033_18840	SB17034_14340	SB17035_21945	SB17036_03185	SB17037_06930	SB17038_05525	SB17039_03340	SB17040_02435	SB17042_08145
mutS		DNA mismatch repair protein MutS	46	46	1	99	8088				2561	2567	2565	2E151-R_16265	HBI01_08855	HBI05_15555	HBI04_21230	HBI02_17725	HBI03_10840	PS148-R_16130	PS15001_05945	PS15002_00490	PS16001_01555	PS16002_17505	PS16003_17850	PS16004_11690	PS16005_07460	PS184-R_15975	PS310-R_18040	PS378-R_15530	PS57-R_15570	RL316_18235	RL320_21505	RL97_14675	SA17021_19625	SA17022_08295	SA17023_15845	SA17024_25155	SA17101_06410	SB17032_01805	SB17033_13440	SB17034_15095	SB17035_19540	SB17036_06265	SB17037_19680	SB17038_11025	SB17039_06580	SB17040_11335	SB17042_17070
rluB		23S rRNA pseudouridine(2605) synthase RluB	46	46	1	99	6131				872	884	875	2E151-R_16870	HBI01_15280	HBI05_17130	HBI04_00630	HBI02_02705	HBI03_14425	PS148-R_16590	PS15001_04445	PS15002_18655	PS16001_25375	PS16002_08940	PS16003_23875	PS16004_02330	PS16005_04890	PS184-R_16435	PS310-R_18925	PS378-R_16420	PS57-R_16030	RL316_13270	RL320_19180	RL97_21415	SA17021_25120	SA17022_18105	SA17023_25180	SA17024_00480	SA17101_19340	SB17032_11990	SB17033_22425	SB17034_13230	SB17035_16815	SB17036_17940	SB17037_18665	SB17038_00775	SB17039_24910	SB17040_03630	SB17042_12200
ccmH		cytochrome c-type biogenesis thiol:disulfide oxidoreductase CcmH	46	46	1	99	10363				1052	1052	1052	2E151-R_04545	HBI01_18115	HBI05_23000	HBI04_17365	HBI02_09385	HBI03_11160	PS148-R_02825	PS15001_14925	PS15002_03680	PS16001_02855	PS16002_15290	PS16003_06175	PS16004_02670	PS16005_14810	PS184-R_07625	PS310-R_07575	PS378-R_02825	PS57-R_04905	RL316_15175	RL320_13005	RL97_05605	SA17021_13150	SA17022_02195	SA17023_09385	SA17024_20245	SA17101_03920	SB17032_24085	SB17033_18670	SB17034_18530	SB17035_21775	SB17036_03015	SB17037_06760	SB17038_05695	SB17039_03170	SB17040_02265	SB17042_07985
aceB		malate synthase A	46	46	1	99	2485				1601	1601	1601	2E151-R_24270	HBI01_22530	HBI05_00965	HBI04_13835	HBI02_05390	HBI03_12255	PS148-R_24165	PS15001_15900	PS15002_12330	PS16001_08055	PS16002_02705	PS16003_04510	PS16004_17070	PS16005_12220	PS184-R_24435	PS310-R_20955	PS378-R_24540	PS57-R_24110	RL316_23900	RL320_06750	RL97_23015	SA17021_12060	SA17022_04075	SA17023_00745	SA17024_03540	SA17101_07705	SB17032_10110	SB17033_08995	SB17034_00980	SB17035_16025	SB17036_07695	SB17037_14300	SB17038_09725	SB17039_08245	SB17040_06600	SB17042_18090
ybjI		5-amino-6-(5-phospho-D-ribitylamino)uracil phosphatase	46	46	1	99	10000				710	815	812	2E151-R_02530	HBI01_13115	HBI05_07240	HBI04_26100	HBI02_16810	HBI03_11460	PS148-R_04290	PS15001_23355	PS15002_02555	PS16001_05630	PS16002_11030	PS16003_14740	PS16004_14950	PS16005_19590	PS184-R_05255	PS310-R_05560	PS378-R_05200	PS57-R_03420	RL316_17005	RL320_15030	RL97_09160	SA17021_01040	SA17022_09705	SA17023_00365	SA17024_00755	SA17101_01655	SB17032_23145	SB17033_04610	SB17034_20295	SB17035_06535	SB17036_04390	SB17037_03815	SB17038_02575	SB17039_22535	SB17040_19935	SB17042_07895
nadE		ammonia-dependent NAD(+) synthetase	46	46	1	99	9391				827	827	827	2E151-R_05955	HBI01_19470	HBI05_23645	HBI04_12700	HBI02_21700	HBI03_00445	PS148-R_10315	PS15001_24960	PS15002_07255	PS16001_21735	PS16002_21280	PS16003_25095	PS16004_26035	PS16005_19825	PS184-R_00830	PS310-R_01895	PS378-R_07595	PS57-R_09125	RL316_21810	RL320_00465	RL97_03895	SA17021_07915	SA17022_20630	SA17023_18915	SA17024_11585	SA17101_21915	SB17032_20385	SB17033_25495	SB17034_03890	SB17035_14950	SB17036_18955	SB17037_07675	SB17038_07740	SB17039_16395	SB17040_14580	SB17042_10745
dusC		tRNA dihydrouridine(16) synthase DusC	46	46	1	99	26				947	950	949	2E151-R_04265	HBI01_18395	HBI05_09845	HBI04_17090	HBI02_06120	HBI03_10885	PS148-R_02545	PS15001_15205	PS15002_03960	PS16001_02575	PS16002_15575	PS16003_05895	PS16004_02950	PS16005_14530	PS184-R_07905	PS310-R_07295	PS378-R_02545	PS57-R_05185	RL316_15455	RL320_12645	RL97_05885	SA17021_12870	SA17022_01915	SA17023_09105	SA17024_19965	SA17101_03655	SB17032_24355	SB17033_18950	SB17034_14450	SB17035_22055	SB17036_03295	SB17037_07040	SB17038_05415	SB17039_03450	SB17040_02545	SB17042_08260
zraP		zinc resistance sensor/chaperone ZraP	46	46	1	99	6754				419	425	420	2E151-R_25005	HBI01_15400	HBI05_13975	HBI04_15210	HBI02_14830	HBI03_14020	PS148-R_24745	PS15001_11850	PS15002_11665	PS16001_13585	PS16002_12635	PS16003_13955	PS16004_21965	PS16005_23050	PS184-R_25065	PS310-R_24890	PS378-R_25035	PS57-R_24970	RL316_16180	RL320_18005	RL97_10405	SA17021_16570	SA17022_15830	SA17023_24470	SA17024_15605	SA17101_16260	SB17032_10865	SB17033_19790	SB17034_17305	SB17035_12960	SB17036_17360	SB17037_15905	SB17038_20295	SB17039_13195	SB17040_16185	SB17042_23920
cysP		thiosulfate/sulfate ABC transporter substrate-binding protein CysP	46	46	1	99	447				1016	1016	1016	2E151-R_24040	HBI01_25620	HBI05_01225	HBI04_16750	HBI02_08430	HBI03_23635	PS148-R_23690	PS15001_13825	PS15002_08375	PS16001_03955	PS16002_06615	PS16003_07280	PS16004_01170	PS16005_10300	PS184-R_24310	PS310-R_11420	PS378-R_10620	PS57-R_23515	RL316_10200	RL320_26575	RL97_13195	SA17021_04125	SA17022_03295	SA17023_10490	SA17024_18470	SA17101_05040	SB17032_14915	SB17033_21600	SB17034_12145	SB17035_20670	SB17036_14705	SB17037_05655	SB17038_06795	SB17039_09485	SB17040_01165	SB17042_00870
ydgJ		Uncharacterized oxidoreductase YdgJ	46	46	1	99	3053				1040	1040	1040	2E151-R_06810	HBI01_00685	HBI05_04245	HBI04_25870	HBI02_09065	HBI03_12730	PS148-R_19560	PS15001_25815	PS15002_09015	PS16001_22590	PS16002_22135	PS16003_25950	PS16004_12775	PS16005_05350	PS184-R_19795	PS310-R_02750	PS378-R_20160	PS57-R_18810	RL316_22665	RL320_17065	RL97_25720	SA17021_06555	SA17022_19770	SA17023_18055	SA17024_10730	SA17101_21300	SB17032_22805	SB17033_16890	SB17034_05500	SB17035_12170	SB17036_25245	SB17037_08550	SB17038_08600	SB17039_15540	SB17040_15445	SB17042_11370
surE		5'/3'-nucleotidase SurE	46	46	1	99	8098				761	761	761	2E151-R_16330	HBI01_08920	HBI05_15605	HBI04_19020	HBI02_17775	HBI03_18220	PS148-R_16065	PS15001_06010	PS15002_00425	PS16001_01620	PS16002_17570	PS16003_17915	PS16004_11625	PS16005_07395	PS184-R_15910	PS310-R_18105	PS378-R_15595	PS57-R_15505	RL316_18300	RL320_21440	RL97_14740	SA17021_19690	SA17022_08230	SA17023_15910	SA17024_25090	SA17101_06485	SB17032_01760	SB17033_13505	SB17034_15160	SB17035_19475	SB17036_06200	SB17037_19615	SB17038_10960	SB17039_06515	SB17040_11270	SB17042_17115
ytfT		Galactofuranose transporter permease protein YtfT	46	46	1	99	6558				1022	1022	1022	2E151-R_12780	HBI01_02300	HBI05_02920	HBI04_10050	HBI02_04820	HBI03_12045	PS148-R_12815	PS15001_17840	PS15002_05430	PS16001_20305	PS16002_04850	PS16003_22525	PS16004_08890	PS16005_15745	PS184-R_12350	PS310-R_14065	PS378-R_12955	PS57-R_10895	RL316_09105	RL320_02485	RL97_15330	SA17021_05910	SA17022_10760	SA17023_13670	SA17024_23205	SA17101_24200	SB17032_08440	SB17033_10590	SB17034_08345	SB17035_00610	SB17036_24735	SB17037_04785	SB17038_14000	SB17039_06870	SB17040_06890	SB17042_19070
yqaA		Inner membrane protein YqaA	46	46	1	99	8035				428	428	428	2E151-R_21955	HBI01_03000	HBI05_00185	HBI04_22185	HBI02_17495	HBI03_14110	PS148-R_21605	PS15001_10430	PS15002_17885	PS16001_26515	PS16002_07435	PS16003_24430	PS16004_10710	PS16005_02930	PS184-R_21755	PS310-R_22680	PS378-R_22420	PS57-R_21715	RL316_17945	RL320_05635	RL97_11720	SA17021_10970	SA17022_14915	SA17023_14550	SA17024_06105	SA17101_06180	SB17032_02035	SB17033_13150	SB17034_17600	SB17035_11720	SB17036_13230	SB17037_14050	SB17038_14580	SB17039_20840	SB17040_16570	SB17042_16840
msyB		acidic protein MsyB	46	46	1	99	8679				713	713	713	2E151-R_10375	HBI01_16915	HBI05_19115	HBI04_24500	HBI02_15165	HBI03_19775	PS148-R_07360	PS15001_20690	PS15002_24915	PS16001_13295	PS16002_23925	PS16003_11035	PS16004_23975	PS16005_23945	PS184-R_09940	PS310-R_10245	PS378-R_10255	PS57-R_08040	RL316_05885	RL320_03945	RL97_18200	SA17021_21000	SA17022_25455	SA17023_23725	SA17024_21980	SA17101_12545	SB17032_28030	SB17033_01075	SB17034_03715	SB17035_13540	SB17036_11885	SB17037_00610	SB17038_16745	SB17039_19120	SB17040_22790	SB17042_02970
nagZ		beta-N-acetylhexosaminidase	46	46	1	99	624				1025	1025	1025	2E151-R_03760	HBI01_23505	HBI05_14925	HBI04_12100	HBI02_17985	HBI03_02260	PS148-R_05520	PS15001_22125	PS15002_01325	PS16001_11990	PS16002_09800	PS16003_15910	PS16004_19480	PS16005_21420	PS184-R_06485	PS310-R_06790	PS378-R_03970	PS57-R_02190	RL316_24185	RL320_22910	RL97_06945	SA17021_13855	SA17022_08475	SA17023_02295	SA17024_17125	SA17101_02955	SB17032_04565	SB17033_12280	SB17034_19065	SB17035_05310	SB17036_17675	SB17037_02585	SB17038_12305	SB17039_04085	SB17040_18705	SB17042_09875
rsd		sigma D regulator	46	46	1	99	6761				476	476	476	2E151-R_24970	HBI01_15365	HBI05_14010	HBI04_15175	HBI02_14865	HBI03_13985	PS148-R_24710	PS15001_11815	PS15002_11700	PS16001_13620	PS16002_12670	PS16003_13990	PS16004_21930	PS16005_23085	PS184-R_25100	PS310-R_24925	PS378-R_25070	PS57-R_24935	RL316_16145	RL320_17970	RL97_10370	SA17021_16535	SA17022_15795	SA17023_24435	SA17024_15640	SA17101_16225	SB17032_10900	SB17033_19755	SB17034_17270	SB17035_12925	SB17036_17395	SB17037_15940	SB17038_20330	SB17039_13230	SB17040_16220	SB17042_23955
mlaC		phospholipid-binding protein MlaC	46	46	1	99	9068				635	635	635	2E151-R_01640	HBI01_07260	HBI05_13550	HBI04_01920	HBI02_24555	HBI03_19045	PS148-R_00400	PS15001_07090	PS15002_22125	PS16001_10200	PS16002_26030	PS16003_02250	PS16004_03935	PS16005_08755	PS184-R_03135	PS310-R_04675	PS378-R_00400	PS57-R_00400	RL316_26480	RL320_23925	RL97_17350	SA17021_09450	SA17022_06125	SA17023_06435	SA17024_09485	SA17101_11365	SB17032_16695	SB17033_23145	SB17034_09940	SB17035_24370	SB17036_16320	SB17037_16670	SB17038_01715	SB17039_04965	SB17040_07900	SB17042_05415
ynaI		low conductance mechanosensitive channel YnaI	46	46	1	99	6165				1031	1031	1031	2E151-R_17200	HBI01_14950	HBI05_16850	HBI04_09040	HBI02_11545	HBI03_09220	PS148-R_16920	PS15001_04115	PS15002_18325	PS16001_25045	PS16002_20105	PS16003_23705	PS16004_02000	PS16005_25195	PS184-R_16765	PS310-R_18595	PS378-R_16090	PS57-R_16360	RL316_12940	RL320_18850	RL97_21085	SA17021_25450	SA17022_17775	SA17023_24850	SA17024_00150	SA17101_19000	SB17032_11630	SB17033_22090	SB17034_23260	SB17035_17150	SB17036_14110	SB17037_18335	SB17038_24630	SB17039_24580	SB17040_03300	SB17042_11840
yhjG		AsmA family protein YhjG	46	46	1	99	7088				2060	2060	2060	2E151-R_07245	HBI01_11145	HBI05_01380	HBI04_03505	HBI02_24165	HBI03_01045	PS148-R_05705	PS15001_12865	PS15002_11335	PS16001_01400	PS16002_00305	PS16003_04455	PS16004_05725	PS16005_00035	PS184-R_09650	PS310-R_09955	PS378-R_09150	PS57-R_05570	RL316_02460	RL320_10035	RL97_23710	SA17021_15440	SA17022_17130	SA17023_14805	SA17024_14750	SA17101_26160	SB17032_19200	SB17033_01140	SB17034_17550	SB17035_05495	SB17036_13910	SB17037_20655	SB17038_22135	SB17039_02470	SB17040_04425	SB17042_03920
yhdZ		Uncharacterized amino-acid ABC transporter ATP-binding protein YhdZ	46	46	1	99	8994				758	758	758	2E151-R_02035	HBI01_07655	HBI05_13920	HBI04_13140	HBI02_25370	HBI03_15980	PS148-R_00005	PS15001_20150	PS15002_22520	PS16001_10595	PS16002_26425	PS16003_02645	PS16004_04330	PS16005_09150	PS184-R_02740	PS310-R_05070	PS378-R_00005	PS57-R_00005	RL316_26875	RL320_23530	RL97_17745	SA17021_09055	SA17022_06520	SA17023_17020	SA17024_09880	SA17101_11740	SB17032_16330	SB17033_22750	SB17034_09610	SB17035_24765	SB17036_15925	SB17037_17065	SB17038_01320	SB17039_05360	SB17040_07505	SB17042_05050
leuD		3-isopropylmalate dehydratase small subunit	46	46	1	99	8901				605	605	605	2E151-R_10725	HBI01_16560	HBI05_11290	HBI04_18350	HBI02_18600	HBI03_06430	PS148-R_07715	PS15001_12580	PS15002_25265	PS16001_12940	PS16002_23570	PS16003_11390	PS16004_23620	PS16005_24300	PS184-R_10295	PS310-R_10595	PS378-R_09900	PS57-R_07685	RL316_06235	RL320_04300	RL97_18550	SA17021_21355	SA17022_25810	SA17023_23370	SA17024_21625	SA17101_12870	SB17032_27690	SB17033_00720	SB17034_00190	SB17035_13895	SB17036_11530	SB17037_00965	SB17038_17105	SB17039_19475	SB17040_23145	SB17042_02635
csiE		stationary phase inducible protein CsiE	46	46	1	99	288				1280	1280	1280	2E151-R_15035	HBI01_20395	HBI05_06370	HBI04_23760	HBI02_10085	HBI03_09685	PS148-R_14370	PS15001_13335	PS15002_08865	PS16001_04445	PS16002_07935	PS16003_07770	PS16004_06855	PS16005_02785	PS184-R_14215	PS310-R_12150	PS378-R_11350	PS57-R_14195	RL316_09710	RL320_26085	RL97_11010	SA17021_03635	SA17022_03785	SA17023_20545	SA17024_02595	SA17101_05605	SB17032_15480	SB17033_07830	SB17034_11655	SB17035_20180	SB17036_04700	SB17037_05165	SB17038_07285	SB17039_09110	SB17040_00675	SB17042_00305
rnt		ribonuclease T	46	46	1	99	3022				647	647	647	2E151-R_06670	HBI01_03140	HBI05_23460	HBI04_08890	HBI02_08920	HBI03_18840	PS148-R_11030	PS15001_25675	PS15002_07970	PS16001_22450	PS16002_21995	PS16003_25810	PS16004_12915	PS16005_05490	PS184-R_00115	PS310-R_02610	PS378-R_17405	PS57-R_08410	RL316_22525	RL320_17205	RL97_25860	SA17021_07510	SA17022_19915	SA17023_18195	SA17024_10870	SA17101_21445	SB17032_20870	SB17033_17030	SB17034_05640	SB17035_12310	SB17036_25385	SB17037_08410	SB17038_08460	SB17039_15680	SB17040_15305	SB17042_11220
yphD		putative ABC transporter permease protein YphD	46	46	1	99	277				998	998	998	2E151-R_15060	HBI01_20370	HBI05_06425	HBI04_23785	HBI02_10140	HBI03_09710	PS148-R_14345	PS15001_13310	PS15002_08890	PS16001_04470	PS16002_07960	PS16003_07795	PS16004_06830	PS16005_02810	PS184-R_14190	PS310-R_12175	PS378-R_11375	PS57-R_14220	RL316_09685	RL320_26060	RL97_10985	SA17021_03610	SA17022_03810	SA17023_20520	SA17024_02570	SA17101_05660	SB17032_15535	SB17033_07805	SB17034_11630	SB17035_20155	SB17036_04725	SB17037_05140	SB17038_07310	SB17039_09135	SB17040_00650	SB17042_00250
coaBC		bifunctional phosphopantothenoylcysteine decarboxylase/phosphopantothenate--cysteine ligase CoaBC	46	46	1	99	4802				1220	1220	1220	2E151-R_07845	HBI01_04645	HBI05_08695	HBI04_19910	HBI02_04175	HBI03_07725	PS148-R_06305	PS15001_05615	PS15002_06330	PS16001_00800	PS16002_00905	PS16003_03855	PS16004_07770	PS16005_01115	PS184-R_09050	PS310-R_09355	PS378-R_08550	PS57-R_06170	RL316_03060	RL320_09435	RL97_08245	SA17021_14845	SA17022_00515	SA17023_04380	SA17024_04360	SA17101_01475	SB17032_18550	SB17033_01740	SB17034_02185	SB17035_06095	SB17036_00810	SB17037_21250	SB17038_21535	SB17039_01870	SB17040_05025	SB17042_19330
yejA		Uncharacterized protein YejA	46	46	1	99	65				1814	1814	1814	2E151-R_04455	HBI01_18205	HBI05_10035	HBI04_17285	HBI02_06310	HBI03_11075	PS148-R_02735	PS15001_15015	PS15002_03770	PS16001_02765	PS16002_15385	PS16003_06085	PS16004_02760	PS16005_14720	PS184-R_07715	PS310-R_07485	PS378-R_02735	PS57-R_04995	RL316_15265	RL320_12835	RL97_05695	SA17021_13060	SA17022_02105	SA17023_09295	SA17024_20155	SA17101_03845	SB17032_24160	SB17033_18760	SB17034_14260	SB17035_21865	SB17036_03105	SB17037_06850	SB17038_05605	SB17039_03260	SB17040_02355	SB17042_08060
galK		galactokinase	46	46	1	99	9902				1148	1148	1148	2E151-R_02090	HBI01_04925	HBI05_19545	HBI04_26545	HBI02_10975	HBI03_03740	PS148-R_03850	PS15001_12100	PS15002_09745	PS16001_16700	PS16002_09225	PS16003_09515	PS16004_13710	PS16005_10895	PS184-R_04815	PS310-R_05120	PS378-R_05640	PS57-R_03860	RL316_17445	RL320_15470	RL97_08720	SA17021_01590	SA17022_06820	SA17023_12600	SA17024_01195	SA17101_20380	SB17032_06270	SB17033_05050	SB17034_20735	SB17035_06975	SB17036_03950	SB17037_11555	SB17038_03015	SB17039_22095	SB17040_20375	SB17042_07435
yebO		Uncharacterized protein YebO	46	46	1	99	9486				287	287	287	2E151-R_05545	HBI01_19880	HBI05_24080	HBI04_03110	HBI02_22135	HBI03_01630	PS148-R_09905	PS15001_24550	PS15002_06845	PS16001_21325	PS16002_20870	PS16003_24685	PS16004_25625	PS16005_20495	PS184-R_01240	PS310-R_01485	PS378-R_07185	PS57-R_09535	RL316_21400	RL320_00055	RL97_03485	SA17021_08325	SA17022_21040	SA17023_19325	SA17024_11995	SA17101_00660	SB17032_19940	SB17033_25905	SB17034_04300	SB17035_08985	SB17036_19365	SB17037_07265	SB17038_19880	SB17039_16805	SB17040_14165	SB17042_13290
mcbA		DUF1471 domain-containing protein	46	46	1	99	9960				260	260	260	2E151-R_02340	HBI01_12925	HBI05_07460	HBI04_26290	HBI02_23945	HBI03_09260	PS148-R_04100	PS15001_23545	PS15002_02745	PS16001_05820	PS16002_11220	PS16003_14550	PS16004_19100	PS16005_19400	PS184-R_05065	PS310-R_05370	PS378-R_05390	PS57-R_03610	RL316_17195	RL320_15220	RL97_08970	SA17021_01230	SA17022_09895	SA17023_00175	SA17024_00945	SA17101_20645	SB17032_06540	SB17033_04800	SB17034_20485	SB17035_06725	SB17036_04200	SB17037_04005	SB17038_02765	SB17039_22345	SB17040_20125	SB17042_07700
flgK		flagellar hook-associated protein FlgK	46	46	1	99	649				1643	1643	1643	2E151-R_03635	HBI01_23630	HBI05_14790	HBI04_12225	HBI02_00335	HBI03_02385	PS148-R_05395	PS15001_22250	PS15002_01450	PS16001_11865	PS16002_09925	PS16003_12245	PS16004_19605	PS16005_21295	PS184-R_06360	PS310-R_06665	PS378-R_04095	PS57-R_02315	RL316_24310	RL320_23035	RL97_06820	SA17021_13980	SA17022_08600	SA17023_02170	SA17024_16995	SA17101_02830	SB17032_04440	SB17033_02630	SB17034_19190	SB17035_05185	SB17036_17550	SB17037_02710	SB17038_12430	SB17039_23640	SB17040_18830	SB17042_09750
recD		exodeoxyribonuclease V subunit alpha	46	46	1	99	7702				1826	1826	1826	2E151-R_15455	HBI01_15625	HBI05_20970	HBI04_21320	HBI02_26780	HBI03_12500	PS148-R_15175	PS15001_00070	PS15002_14010	PS16001_24310	PS16002_03545	PS16003_08150	PS16004_07005	PS16005_09880	PS184-R_15405	PS310-R_16570	PS378-R_14725	PS57-R_15000	RL316_18820	RL320_20915	RL97_05110	SA17021_20210	SA17022_12725	SA17023_03605	SA17024_24570	SA17101_06890	SB17032_01350	SB17033_14025	SB17034_15680	SB17035_18960	SB17036_05680	SB17037_12455	SB17038_10460	SB17039_05995	SB17040_10750	SB17042_12815
rlmD		23S rRNA (uracil(1939)-C(5))-methyltransferase RlmD	46	46	1	99	7734				1301	1301	1301	2E151-R_16525	HBI01_09115	HBI05_20795	HBI04_20735	HBI02_26955	HBI03_12585	PS148-R_15870	PS15001_06205	PS15002_00230	PS16001_01815	PS16002_17765	PS16003_18110	PS16004_11430	PS16005_07200	PS184-R_15715	PS310-R_18300	PS378-R_15790	PS57-R_15310	RL316_18495	RL320_21245	RL97_14935	SA17021_19885	SA17022_08035	SA17023_16105	SA17024_24895	SA17101_06705	SB17032_01535	SB17033_13700	SB17034_15355	SB17035_19280	SB17036_06005	SB17037_19420	SB17038_10765	SB17039_06320	SB17040_11075	SB17042_13000
recB		exodeoxyribonuclease V subunit beta	46	46	1	99	7701				3542	3542	3542	2E151-R_15460	HBI01_15630	HBI05_20975	HBI04_21325	HBI02_26775	HBI03_12505	PS148-R_15180	PS15001_00075	PS15002_14015	PS16001_24305	PS16002_03550	PS16003_08155	PS16004_07010	PS16005_09875	PS184-R_15400	PS310-R_16575	PS378-R_14730	PS57-R_14995	RL316_18825	RL320_20910	RL97_05115	SA17021_20215	SA17022_12720	SA17023_03610	SA17024_24565	SA17101_06895	SB17032_01345	SB17033_14030	SB17034_15685	SB17035_18955	SB17036_05675	SB17037_12460	SB17038_10455	SB17039_05990	SB17040_10745	SB17042_12810
group_10438	yfcZ	UPF0381 protein YfcZ	46	46	1	99	523				284	284	284	2E151-R_05305	HBI01_06305	HBI05_05595	HBI04_15955	HBI02_08770	HBI03_19875	PS148-R_03585	PS15001_14165	PS15002_06720	PS16001_03615	PS16002_12100	PS16003_06935	PS16004_10680	PS16005_14415	PS184-R_06865	PS310-R_08335	PS378-R_03585	PS57-R_04145	RL316_14415	RL320_17870	RL97_04675	SA17021_04465	SA17022_02955	SA17023_10150	SA17024_18130	SA17101_04625	SB17032_14325	SB17033_06570	SB17034_12485	SB17035_21010	SB17036_15045	SB17037_06000	SB17038_06455	SB17039_09825	SB17040_01505	SB17042_01225
ydiF		Acetate CoA-transferase YdiF	46	46	1	99	2979				1595	1595	1595	2E151-R_06435	HBI01_00170	HBI05_23225	HBI04_19530	HBI02_22500	HBI03_01225	PS148-R_10795	PS15001_25440	PS15002_07735	PS16001_22215	PS16002_21760	PS16003_25575	PS16004_10065	PS16005_22840	PS184-R_00350	PS310-R_02375	PS378-R_17640	PS57-R_08645	RL316_22290	RL320_17440	RL97_26095	SA17021_07275	SA17022_20150	SA17023_18430	SA17024_11105	SA17101_21680	SB17032_20625	SB17033_17265	SB17034_05875	SB17035_12545	SB17036_19495	SB17037_08175	SB17038_08225	SB17039_15915	SB17040_15070	SB17042_10985
nfsA		nitroreductase NfsA	46	46	1	99	10008				476	722	684	2E151-R_02570	HBI01_13155	HBI05_07200	HBI04_05065	HBI02_16770	HBI03_11420	PS148-R_04330	PS15001_23315	PS15002_02515	PS16001_05590	PS16002_10990	PS16003_14780	PS16004_14910	PS16005_19630	PS184-R_05295	PS310-R_05600	PS378-R_05160	PS57-R_03380	RL316_16965	RL320_14990	RL97_09200	SA17021_01000	SA17022_09665	SA17023_00405	SA17024_00715	SA17101_01695	SB17032_23195	SB17033_04570	SB17034_20255	SB17035_06495	SB17036_04430	SB17037_03775	SB17038_02535	SB17039_22575	SB17040_19895	SB17042_18785
recN		DNA repair protein RecN	46	46	1	99	7887				1661	1661	1661	2E151-R_21760	HBI01_02805	HBI05_13040	HBI04_02840	HBI02_14435	HBI03_07045	PS148-R_21800	PS15001_10625	PS15002_17690	PS16001_26320	PS16002_07630	PS16003_24235	PS16004_10905	PS16005_03125	PS184-R_21950	PS310-R_22485	PS378-R_22225	PS57-R_21910	RL316_17750	RL320_05830	RL97_16530	SA17021_11165	SA17022_14720	SA17023_14355	SA17024_06300	SA17101_05960	SB17032_03145	SB17033_12955	SB17034_17795	SB17035_11525	SB17036_13425	SB17037_13855	SB17038_14385	SB17039_21035	SB17040_16765	SB17042_23680
ptrA		pitrilysin	46	46	1	99	7700				2888	2888	2888	2E151-R_15465	HBI01_15635	HBI05_20980	HBI04_21330	HBI02_26770	HBI03_12510	PS148-R_15185	PS15001_00080	PS15002_14020	PS16001_24300	PS16002_03555	PS16003_08160	PS16004_07015	PS16005_09870	PS184-R_15395	PS310-R_16580	PS378-R_14735	PS57-R_14990	RL316_18830	RL320_20905	RL97_05120	SA17021_20220	SA17022_12715	SA17023_03615	SA17024_24560	SA17101_06900	SB17032_01340	SB17033_14035	SB17034_15690	SB17035_18950	SB17036_05670	SB17037_12465	SB17038_10450	SB17039_05985	SB17040_10740	SB17042_12805
yjaG		Uncharacterized protein YjaG	46	46	1	99	6757				590	590	590	2E151-R_24990	HBI01_15385	HBI05_13990	HBI04_15195	HBI02_14845	HBI03_14005	PS148-R_24730	PS15001_11835	PS15002_11680	PS16001_13600	PS16002_12650	PS16003_13970	PS16004_21950	PS16005_23065	PS184-R_25080	PS310-R_24905	PS378-R_25050	PS57-R_24955	RL316_16165	RL320_17990	RL97_10390	SA17021_16555	SA17022_15815	SA17023_24455	SA17024_15620	SA17101_16245	SB17032_10880	SB17033_19775	SB17034_17290	SB17035_12945	SB17036_17375	SB17037_15920	SB17038_20310	SB17039_13210	SB17040_16200	SB17042_23935
Acetolactate synthase		Acetolactate synthase	46	46	1	99	4752				1688	1688	1688	2E151-R_08220	HBI01_09610	HBI05_05950	HBI04_02145	HBI02_06560	HBI03_20125	PS148-R_06680	PS15001_11470	PS15002_15570	PS16001_00425	PS16002_01280	PS16003_03480	PS16004_08285	PS16005_01490	PS184-R_08675	PS310-R_08980	PS378-R_08175	PS57-R_06545	RL316_01840	RL320_07665	RL97_07670	SA17021_14470	SA17022_00890	SA17023_04755	SA17024_03985	SA17101_01300	SB17032_10670	SB17033_02115	SB17034_13685	SB17035_10635	SB17036_01185	SB17037_21625	SB17038_11195	SB17039_01495	SB17040_05400	SB17042_16080
yjjB		threonine/serine exporter	46	46	1	99	8623				473	473	473	2E151-R_13425	HBI01_11870	HBI05_24130	HBI04_18380	HBI02_05785	HBI03_12860	PS148-R_12170	PS15001_07995	PS15002_24390	PS16001_19665	PS16002_19470	PS16003_21885	PS16004_20825	PS16005_23545	PS184-R_12990	PS310-R_13425	PS378-R_13605	PS57-R_11535	RL316_05450	RL320_16325	RL97_01570	SA17021_24305	SA17022_24865	SA17023_21300	SA17024_22560	SA17101_25130	SB17032_28330	SB17033_03875	SB17034_03130	SB17035_09040	SB17036_12470	SB17037_00025	SB17038_16155	SB17039_18535	SB17040_22200	SB17042_03270
ybeY		rRNA maturation RNase YbeY	46	46	1	99	1566				467	467	467	2E151-R_18005	HBI01_10635	HBI05_02025	HBI04_14215	HBI02_14115	HBI03_16295	PS148-R_17085	PS15001_08650	PS15002_10205	PS16001_17170	PS16002_17305	PS16003_09040	PS16004_15330	PS16005_17775	PS184-R_16930	PS310-R_19775	PS378-R_17270	PS57-R_17165	RL316_07900	RL320_22190	RL97_09995	SA17021_02065	SA17022_07090	SA17023_13075	SA17024_01670	SA17101_23550	SB17032_17645	SB17033_05525	SB17034_21210	SB17035_07450	SB17036_02320	SB17037_12030	SB17038_03490	SB17039_10500	SB17040_20840	SB17042_06940
ygaZ		L-valine exporter subunit YgaZ	46	46	1	99	8025				737	737	737	2E151-R_21905	HBI01_02950	HBI05_00145	HBI04_22130	HBI02_17455	HBI03_14160	PS148-R_21655	PS15001_10480	PS15002_17835	PS16001_26465	PS16002_07485	PS16003_24380	PS16004_10760	PS16005_02980	PS184-R_21805	PS310-R_22630	PS378-R_22370	PS57-R_21765	RL316_17895	RL320_05685	RL97_11770	SA17021_11020	SA17022_14865	SA17023_14500	SA17024_06155	SA17101_06140	SB17032_02075	SB17033_13100	SB17034_17650	SB17035_11670	SB17036_13280	SB17037_14000	SB17038_14530	SB17039_20890	SB17040_16620	SB17042_16800
ypeB		Uncharacterized protein YpeB	46	46	1	99	461				218	218	218	2E151-R_23970	HBI01_25690	HBI05_01155	HBI04_16680	HBI02_08500	HBI03_23565	PS148-R_23760	PS15001_13895	PS15002_08305	PS16001_03885	PS16002_06545	PS16003_07210	PS16004_01100	PS16005_10370	PS184-R_24380	PS310-R_11350	PS378-R_10550	PS57-R_23445	RL316_10270	RL320_26645	RL97_13125	SA17021_04195	SA17022_03225	SA17023_10420	SA17024_18400	SA17101_04970	SB17032_14845	SB17033_21670	SB17034_12215	SB17035_20740	SB17036_14775	SB17037_05725	SB17038_06725	SB17039_09555	SB17040_01235	SB17042_00940
entA		2,3-dihydro-2,3-dihydroxybenzoate dehydrogenase EntA	46	46	1	99	1499				746	746	746	2E151-R_17700	HBI01_21355	HBI05_02335	HBI04_06835	HBI02_20115	HBI03_05960	PS148-R_17390	PS15001_08955	PS15002_10510	PS16001_16240	PS16002_05960	PS16003_13575	PS16004_15855	PS16005_15045	PS184-R_17235	PS310-R_19470	PS378-R_16965	PS57-R_16860	RL316_07595	RL320_21885	RL97_19680	SA17021_02370	SA17022_07395	SA17023_13380	SA17024_01975	SA17101_23230	SB17032_17965	SB17033_05830	SB17034_21515	SB17035_07755	SB17036_02015	SB17037_12335	SB17038_03795	SB17039_10270	SB17040_21145	SB17042_06625
rdgC		Recombination-associated protein RdgC	46	46	1	99	1937				977	977	977	2E151-R_11905	HBI01_13985	HBI05_09160	HBI04_07900	HBI02_18290	HBI03_01880	PS148-R_11625	PS15001_01245	PS15002_04630	PS16001_06455	PS16002_02220	PS16003_10260	PS16004_00770	PS16005_16825	PS184-R_11475	PS310-R_12875	PS378-R_12135	PS57-R_10020	RL316_00955	RL320_11265	RL97_14195	SA17021_05000	SA17022_23155	SA17023_10940	SA17024_07330	SA17101_14070	SB17032_02825	SB17033_09905	SB17034_09130	SB17035_01340	SB17036_06795	SB17037_24120	SB17038_25750	SB17039_11585	SB17040_17545	SB17042_14990
wzxC		colanic acid undecaprenyl disphosphate flippase WzxC	46	46	1	99	1206				1478	1478	1478	2E151-R_24295	HBI01_18890	HBI05_04710	HBI04_18935	HBI02_04590	HBI03_09940	PS148-R_02045	PS15001_15700	PS15002_13410	PS16001_02075	PS16002_16070	PS16003_05395	PS16004_04950	PS16005_11490	PS184-R_24725	PS310-R_24265	PS378-R_02045	PS57-R_24400	RL316_15950	RL320_12145	RL97_03380	SA17021_12375	SA17022_01420	SA17023_08605	SA17024_19470	SA17101_17440	SB17032_24885	SB17033_19450	SB17034_14950	SB17035_22555	SB17036_03790	SB17037_20100	SB17038_04915	SB17039_21275	SB17040_03045	SB17042_08795
ybaE		Uncharacterized protein YbaE	46	46	1	99	1994				1700	1700	1700	2E151-R_12170	HBI01_14250	HBI05_12665	HBI04_08165	HBI02_26110	HBI03_02145	PS148-R_11890	PS15001_01510	PS15002_04365	PS16001_06720	PS16002_01955	PS16003_10525	PS16004_00505	PS16005_17090	PS184-R_11740	PS310-R_13140	PS378-R_11870	PS57-R_10285	RL316_00690	RL320_11000	RL97_13930	SA17021_04735	SA17022_23420	SA17023_10675	SA17024_07595	SA17101_14350	SB17032_12920	SB17033_09640	SB17034_08865	SB17035_08365	SB17036_06530	SB17037_23855	SB17038_25485	SB17039_11320	SB17040_00155	SB17042_14710
katE		catalase HPII	46	46	1	99	9383				2261	2261	2261	2E151-R_05995	HBI01_19430	HBI05_23605	HBI04_12660	HBI02_01590	HBI03_00405	PS148-R_10355	PS15001_25000	PS15002_07295	PS16001_21775	PS16002_21320	PS16003_25135	PS16004_26075	PS16005_19865	PS184-R_00790	PS310-R_01935	PS378-R_07635	PS57-R_09085	RL316_21850	RL320_00505	RL97_03935	SA17021_07875	SA17022_20590	SA17023_18875	SA17024_11545	SA17101_21875	SB17032_20425	SB17033_25455	SB17034_16785	SB17035_14990	SB17036_18915	SB17037_07715	SB17038_07780	SB17039_16355	SB17040_14620	SB17042_10785
ulaG		L-ascorbate 6-phosphate lactonase	46	46	1	99	4188				1064	1064	1064	2E151-R_12560	HBI01_02520	HBI05_21895	HBI04_23540	HBI02_05460	HBI03_01450	PS148-R_13035	PS15001_17620	PS15002_05650	PS16001_20525	PS16002_04630	PS16003_22745	PS16004_09110	PS16005_15525	PS184-R_12130	PS310-R_14285	PS378-R_12735	PS57-R_10675	RL316_08885	RL320_02265	RL97_15550	SA17021_06130	SA17022_10980	SA17023_13890	SA17024_23425	SA17101_23995	SB17032_08240	SB17033_10810	SB17034_08125	SB17035_00390	SB17036_24515	SB17037_04565	SB17038_13780	SB17039_07090	SB17040_07110	SB17042_13920
ybjG		undecaprenyl-diphosphate phosphatase	46	46	1	99	9997				596	596	596	2E151-R_02515	HBI01_13100	HBI05_07255	HBI04_26115	HBI02_16825	HBI03_11475	PS148-R_04275	PS15001_23370	PS15002_02570	PS16001_05645	PS16002_11045	PS16003_14725	PS16004_14965	PS16005_19575	PS184-R_05240	PS310-R_05545	PS378-R_05215	PS57-R_03435	RL316_17020	RL320_15045	RL97_09145	SA17021_01055	SA17022_09720	SA17023_00350	SA17024_00770	SA17101_01640	SB17032_23130	SB17033_04625	SB17034_20310	SB17035_06550	SB17036_04375	SB17037_03830	SB17038_02590	SB17039_22520	SB17040_19950	SB17042_07880
tsaD		tRNA (adenosine(37)-N6)-threonylcarbamoyltransferase complex transferase subunit TsaD	46	46	1	99	9206				1013	1013	1013	2E151-R_01030	HBI01_06650	HBI05_22595	HBI04_24240	HBI02_10815	HBI03_15800	PS148-R_01010	PS15001_06480	PS15002_21515	PS16001_09590	PS16002_25420	PS16003_01640	PS16004_03325	PS16005_08145	PS184-R_03745	PS310-R_04065	PS378-R_01010	PS57-R_01010	RL316_25870	RL320_24535	RL97_16735	SA17021_10060	SA17022_05515	SA17023_05825	SA17024_08875	SA17101_10695	SB17032_05325	SB17033_23755	SB17034_06745	SB17035_23755	SB17036_09135	SB17037_16060	SB17038_02325	SB17039_12590	SB17040_09955	SB17042_06080
argH		argininosuccinate lyase	46	46	1	99	928				1373	1373	1373	2E151-R_20125	HBI01_25780	HBI05_18820	HBI04_07775	HBI02_13515	HBI03_05225	PS148-R_20605	PS15001_15975	PS15002_00560	PS16001_10975	PS16002_05185	PS16003_00370	PS16004_06575	PS16005_04125	PS184-R_20225	PS310-R_17165	PS378-R_20590	PS57-R_19770	RL316_04045	RL320_16125	RL97_12560	SA17021_16670	SA17022_11395	SA17023_07670	SA17024_12850	SA17101_22265	SB17032_09110	SB17033_06380	SB17034_23955	SB17035_09490	SB17036_07500	SB17037_09570	SB17038_04200	SB17039_00620	SB17040_09045	SB17042_20255
tadA		tRNA adenosine(34) deaminase TadA	46	46	1	99	264				503	503	503	2E151-R_15135	HBI01_20295	HBI05_06500	HBI04_23860	HBI02_15920	HBI03_01250	PS148-R_14270	PS15001_13235	PS15002_08965	PS16001_04545	PS16002_08035	PS16003_07870	PS16004_06755	PS16005_02885	PS184-R_14115	PS310-R_12250	PS378-R_11450	PS57-R_14295	RL316_09610	RL320_25985	RL97_10910	SA17021_03535	SA17022_03885	SA17023_20445	SA17024_02495	SA17101_05735	SB17032_15610	SB17033_07730	SB17034_11555	SB17035_20080	SB17036_04800	SB17037_15680	SB17038_07385	SB17039_09210	SB17040_00575	SB17042_00175
ampE		beta-lactamase regulator AmpE	46	46	1	99	8862				854	854	854	2E151-R_10935	HBI01_16350	HBI05_11080	HBI04_20095	HBI02_07605	HBI03_14195	PS148-R_07925	PS15001_12370	PS15002_25475	PS16001_12730	PS16002_23360	PS16003_11600	PS16004_23410	PS16005_24510	PS184-R_10505	PS310-R_10805	PS378-R_09690	PS57-R_07475	RL316_06445	RL320_04510	RL97_18760	SA17021_21565	SA17022_26020	SA17023_23160	SA17024_21415	SA17101_13080	SB17032_27470	SB17033_00510	SB17034_00400	SB17035_14105	SB17036_11315	SB17037_01175	SB17038_17315	SB17039_19685	SB17040_23355	SB17042_02415
malQ		4-alpha-glucanotransferase	46	46	1	99	6932				2081	2084	2083	2E151-R_14025	HBI01_03765	HBI05_17855	HBI04_11435	HBI02_12520	HBI03_23360	PS148-R_13535	PS15001_03060	PS15002_22905	PS16001_14065	PS16002_18630	PS16003_13085	PS16004_14005	PS16005_06190	PS184-R_13590	PS310-R_14780	PS378-R_13995	PS57-R_13185	RL316_19905	RL320_13770	RL97_00380	SA17021_16050	SA17022_16525	SA17023_08065	SA17024_05480	SA17101_26750	SB17032_03680	SB17033_11230	SB17034_25980	SB17035_03110	SB17036_23695	SB17037_25155	SB17038_18420	SB17039_13675	SB17040_25375	SB17042_04685
sprT		SprT family zinc-dependent metalloprotease	46	46	1	99	7501				455	455	455	2E151-R_24470	HBI01_07755	HBI05_24545	HBI04_03440	HBI02_21220	HBI03_03050	PS148-R_24210	PS15001_00645	PS15002_14585	PS16001_23740	PS16002_04115	PS16003_08725	PS16004_07575	PS16005_09305	PS184-R_24870	PS310-R_24440	PS378-R_24585	PS57-R_24545	RL316_19395	RL320_20340	RL97_24740	SA17021_12135	SA17022_12150	SA17023_04180	SA17024_24000	SA17101_07630	SB17032_10345	SB17033_14600	SB17034_16255	SB17035_18385	SB17036_05105	SB17037_13030	SB17038_09885	SB17039_04415	SB17040_10180	SB17042_23030
cysH		phosphoadenosine phosphosulfate reductase	46	46	1	99	8122				734	734	734	2E151-R_16395	HBI01_08985	HBI05_20680	HBI04_19080	HBI02_17875	HBI03_18285	PS148-R_16000	PS15001_06075	PS15002_00360	PS16001_01685	PS16002_17635	PS16003_17980	PS16004_11560	PS16005_07330	PS184-R_15845	PS310-R_18170	PS378-R_15660	PS57-R_15440	RL316_18365	RL320_21375	RL97_14805	SA17021_19755	SA17022_08165	SA17023_15975	SA17024_25025	SA17101_06585	SB17032_01660	SB17033_13570	SB17034_15225	SB17035_19410	SB17036_06135	SB17037_19550	SB17038_10895	SB17039_06450	SB17040_11205	SB17042_13125
sapB		putrescine ABC transporter permease SapB	46	46	1	99	6194				965	965	965	2E151-R_17045	HBI01_15105	HBI05_16985	HBI04_09205	HBI02_02560	HBI03_19965	PS148-R_16765	PS15001_04270	PS15002_18480	PS16001_25200	PS16002_16350	PS16003_23550	PS16004_02155	PS16005_05065	PS184-R_16610	PS310-R_18750	PS378-R_16245	PS57-R_16205	RL316_13095	RL320_19005	RL97_21240	SA17021_25295	SA17022_17930	SA17023_25005	SA17024_00305	SA17101_19195	SB17032_11825	SB17033_22250	SB17034_23415	SB17035_16995	SB17036_18115	SB17037_18490	SB17038_24475	SB17039_24735	SB17040_03455	SB17042_12035
fdhE		formate dehydrogenase accessory protein FdhE	46	46	1	99	1053				929	929	929	2E151-R_20840	HBI01_10215	HBI05_07850	HBI04_11720	HBI02_13865	HBI03_04150	PS148-R_21080	PS15001_16350	PS15002_00935	PS16001_11350	PS16002_05560	PS16003_00745	PS16004_06200	PS16005_03750	PS184-R_20940	PS310-R_17535	PS378-R_21305	PS57-R_20900	RL316_03670	RL320_15750	RL97_01475	SA17021_17045	SA17022_11770	SA17023_07295	SA17024_10140	SA17101_09085	SB17032_09540	SB17033_18340	SB17034_24340	SB17035_09865	SB17036_07125	SB17037_09195	SB17038_04575	SB17039_00245	SB17040_08670	SB17042_20530
sspB		ClpXP protease specificity-enhancing factor	46	46	1	99	9038				497	497	497	2E151-R_01785	HBI01_07405	HBI05_13705	HBI04_02065	HBI02_03190	HBI03_19190	PS148-R_00255	PS15001_07235	PS15002_22270	PS16001_10345	PS16002_26175	PS16003_02395	PS16004_04080	PS16005_08900	PS184-R_02990	PS310-R_04820	PS378-R_00255	PS57-R_00255	RL316_26625	RL320_23780	RL97_17495	SA17021_09305	SA17022_06270	SA17023_06580	SA17024_09630	SA17101_11520	SB17032_16540	SB17033_23000	SB17034_09860	SB17035_24515	SB17036_16175	SB17037_16815	SB17038_01570	SB17039_05110	SB17040_07755	SB17042_05260
nrdH		glutaredoxin-like protein NrdH	46	46	1	99	8017				245	245	245	2E151-R_21860	HBI01_02905	HBI05_00105	HBI04_22085	HBI02_17415	HBI03_08395	PS148-R_21700	PS15001_10525	PS15002_17790	PS16001_26420	PS16002_07530	PS16003_24335	PS16004_10805	PS16005_03025	PS184-R_21850	PS310-R_22585	PS378-R_22325	PS57-R_21810	RL316_17850	RL320_05730	RL97_11815	SA17021_11065	SA17022_14820	SA17023_14455	SA17024_06200	SA17101_06095	SB17032_02120	SB17033_13055	SB17034_17695	SB17035_11625	SB17036_13325	SB17037_13955	SB17038_14485	SB17039_20935	SB17040_16665	SB17042_16755
aaeX		p-hydroxybenzoic acid efflux pump operon protein AaeX	46	46	1	99	9023				203	203	203	2E151-R_01855	HBI01_07475	HBI05_13775	HBI04_19990	HBI02_03120	HBI03_13360	PS148-R_00185	PS15001_19970	PS15002_22340	PS16001_10415	PS16002_26245	PS16003_02465	PS16004_04150	PS16005_08970	PS184-R_02920	PS310-R_04890	PS378-R_00185	PS57-R_00185	RL316_26695	RL320_23710	RL97_17565	SA17021_09235	SA17022_06340	SA17023_06650	SA17024_09700	SA17101_11590	SB17032_16470	SB17033_22930	SB17034_09790	SB17035_24585	SB17036_16105	SB17037_16885	SB17038_01500	SB17039_05180	SB17040_07685	SB17042_05190
xerC		tyrosine recombinase XerC	46	46	1	99	4438				896	896	896	2E151-R_18320	HBI01_20940	HBI05_20320	HBI04_13470	HBI02_19875	HBI03_10090	PS148-R_18685	PS15001_24000	PS15002_16950	PS16001_15705	PS16002_24480	PS16003_02755	PS16004_22290	PS16005_00785	PS184-R_18530	PS310-R_20075	PS378-R_18895	PS57-R_18125	RL316_11080	RL320_01100	RL97_00100	SA17021_23555	SA17022_13415	SA17023_22525	SA17024_13570	SA17101_09595	SB17032_00560	SB17033_25155	SB17034_22160	SB17035_25940	SB17036_16855	SB17037_23245	SB17038_15540	SB17039_14735	SB17040_12400	SB17042_17400
glpA		anaerobic glycerol-3-phosphate dehydrogenase subunit A	46	46	1	99	10300				1628	1628	1628	2E151-R_04795	HBI01_24865	HBI05_21490	HBI04_22535	HBI02_25475	HBI03_02725	PS148-R_03075	PS15001_14675	PS15002_03430	PS16001_03105	PS16002_11590	PS16003_06425	PS16004_02420	PS16005_18210	PS184-R_07375	PS310-R_07825	PS378-R_03075	PS57-R_04655	RL316_14925	RL320_13255	RL97_13545	SA17021_22720	SA17022_02445	SA17023_09640	SA17024_14455	SA17101_04150	SB17032_13810	SB17033_12090	SB17034_18780	SB17035_21525	SB17036_15555	SB17037_06510	SB17038_05945	SB17039_02920	SB17040_02015	SB17042_01735
torS		TMAO reductase system sensor histidine kinase/response regulator TorS	46	46	1	99	752				2687	2699	2689	2E151-R_03200	HBI01_01845	HBI05_14375	HBI04_10665	HBI02_15430	HBI03_21545	PS148-R_04960	PS15001_22685	PS15002_01885	PS16001_18120	PS16002_10360	PS16003_15410	PS16004_20040	PS16005_18880	PS184-R_05925	PS310-R_06230	PS378-R_04530	PS57-R_02750	RL316_16335	RL320_14360	RL97_06385	SA17021_00370	SA17022_09035	SA17023_01735	SA17024_16560	SA17101_02425	SB17032_21850	SB17033_03065	SB17034_19625	SB17035_04750	SB17036_10335	SB17037_03145	SB17038_12865	SB17039_23205	SB17040_19265	SB17042_15160
dcrB		phage sensitivity protein DcrB	46	46	1	99	7000				557	557	557	2E151-R_13745	HBI01_04045	HBI05_18320	HBI04_22400	HBI02_06930	HBI03_11625	PS148-R_13815	PS15001_02780	PS15002_23185	PS16001_14345	PS16002_18350	PS16003_12805	PS16004_18820	PS16005_05910	PS184-R_13310	PS310-R_15060	PS378-R_14275	PS57-R_12905	RL316_20185	RL320_14050	RL97_00660	SA17021_15770	SA17022_16805	SA17023_08345	SA17024_05200	SA17101_26450	SB17032_03375	SB17033_11510	SB17034_25700	SB17035_02830	SB17036_23415	SB17037_24875	SB17038_18140	SB17039_12065	SB17040_25095	SB17042_04380
rutE		malonic semialdehyde reductase	46	46	1	99	718				590	590	590	2E151-R_03280	HBI01_01925	HBI05_14450	HBI04_10755	HBI02_01545	HBI03_21625	PS148-R_05040	PS15001_22605	PS15002_01805	PS16001_18040	PS16002_10280	PS16003_15490	PS16004_19960	PS16005_18800	PS184-R_06005	PS310-R_06310	PS378-R_04450	PS57-R_02670	RL316_24665	RL320_23390	RL97_06465	SA17021_00290	SA17022_08955	SA17023_01815	SA17024_16640	SA17101_02500	SB17032_21925	SB17033_02985	SB17034_19545	SB17035_04830	SB17036_10255	SB17037_03065	SB17038_12785	SB17039_23285	SB17040_19185	SB17042_09255
yhhX		oxidoreductase	46	46	1	99	6962				1037	1037	1037	2E151-R_13895	HBI01_03895	HBI05_18005	HBI04_18840	HBI02_20605	HBI03_14645	PS148-R_13665	PS15001_02930	PS15002_23035	PS16001_14195	PS16002_18500	PS16003_12955	PS16004_18970	PS16005_06060	PS184-R_13460	PS310-R_14910	PS378-R_14125	PS57-R_13055	RL316_20035	RL320_13900	RL97_00510	SA17021_15920	SA17022_16655	SA17023_08195	SA17024_05350	SA17101_26620	SB17032_03530	SB17033_11360	SB17034_25850	SB17035_02980	SB17036_23565	SB17037_25025	SB17038_18290	SB17039_13805	SB17040_25245	SB17042_04535
dsbB		disulfide bond formation protein DsbB	46	46	1	99	6004				530	530	530	2E151-R_18870	HBI01_08530	HBI05_24995	HBI04_24890	HBI02_07190	HBI03_22360	PS148-R_18115	PS15001_04920	PS15002_19130	PS16001_25850	PS16002_12945	PS16003_16715	PS16004_00170	PS16005_04415	PS184-R_17960	PS310-R_15630	PS378-R_18245	PS57-R_17560	RL316_13745	RL320_25690	RL97_21890	SA17021_24645	SA17022_18580	SA17023_02575	SA17024_20740	SA17101_03245	SB17032_12295	SB17033_07400	SB17034_12995	SB17035_16340	SB17036_09530	SB17037_19140	SB17038_00300	SB17039_25385	SB17040_04105	SB17042_10150
pmrB		two-component system sensor histidine kinase PmrB	46	46	1	99	8227				1100	1100	1100	2E151-R_20685	HBI01_21830	HBI05_20015	HBI04_23930	HBI02_03780	HBI03_07920	PS148-R_20925	PS15001_02085	PS15002_11970	PS16001_08755	PS16002_03405	PS16003_05210	PS16004_17995	PS16005_12920	PS184-R_20785	PS310-R_22000	PS378-R_21150	PS57-R_20555	RL316_23200	RL320_06045	RL97_22315	SA17021_11360	SA17022_04775	SA17023_01445	SA17024_02840	SA17101_08260	SB17032_23570	SB17033_08295	SB17034_01680	SB17035_15215	SB17036_08395	SB17037_15000	SB17038_09025	SB17039_07545	SB17040_05900	SB17042_21970
ybcJ		ribosome-associated protein YbcJ	46	46	1	99	2100				212	212	212	2E151-R_17515	HBI01_21540	HBI05_12235	HBI04_21865	HBI02_13285	HBI03_03495	PS148-R_17575	PS15001_09140	PS15002_10695	PS16001_15250	PS16002_06145	PS16003_13760	PS16004_15670	PS16005_21820	PS184-R_17420	PS310-R_19285	PS378-R_16780	PS57-R_16675	RL316_07410	RL320_21700	RL97_20150	SA17021_02555	SA17022_07580	SA17023_03415	SA17024_02160	SA17101_09935	SB17032_26220	SB17033_06015	SB17034_21700	SB17035_07945	SB17036_01830	SB17037_11355	SB17038_03980	SB17039_10085	SB17040_21330	SB17042_18350
fepC		ferrienterobactin ABC transporter ATPase	46	46	1	99	1491				815	815	815	2E151-R_17660	HBI01_21395	HBI05_02375	HBI04_06875	HBI02_20155	HBI03_06000	PS148-R_17430	PS15001_08995	PS15002_10550	PS16001_16280	PS16002_06000	PS16003_13615	PS16004_15815	PS16005_15085	PS184-R_17275	PS310-R_19430	PS378-R_16925	PS57-R_16820	RL316_07555	RL320_21845	RL97_19640	SA17021_02410	SA17022_07435	SA17023_13420	SA17024_02015	SA17101_23190	SB17032_18005	SB17033_05870	SB17034_21555	SB17035_07795	SB17036_01975	SB17037_12375	SB17038_03835	SB17039_10230	SB17040_21185	SB17042_06585
phoR		phosphate regulon sensor histidine kinase PhoR	46	46	1	99	1944				1295	1295	1295	2E151-R_11935	HBI01_14015	HBI05_09130	HBI04_07930	HBI02_18260	HBI03_01910	PS148-R_11655	PS15001_01275	PS15002_04600	PS16001_06485	PS16002_02190	PS16003_10290	PS16004_00740	PS16005_16855	PS184-R_11505	PS310-R_12905	PS378-R_12105	PS57-R_10050	RL316_00925	RL320_11235	RL97_14165	SA17021_04970	SA17022_23185	SA17023_10910	SA17024_07360	SA17101_14100	SB17032_02855	SB17033_09875	SB17034_09100	SB17035_08600	SB17036_06765	SB17037_24090	SB17038_25720	SB17039_11555	SB17040_17515	SB17042_14960
rnhB		ribonuclease HII	46	46	1	99	8754				596	596	596	2E151-R_11350	HBI01_24200	HBI05_01765	HBI04_17790	HBI02_03605	HBI03_17215	PS148-R_08340	PS15001_07375	PS15002_25890	PS16001_12315	PS16002_22955	PS16003_12015	PS16004_22995	PS16005_24925	PS184-R_10920	PS310-R_11220	PS378-R_09275	PS57-R_07060	RL316_06860	RL320_04925	RL97_05005	SA17021_21990	SA17022_26435	SA17023_11645	SA17024_21000	SA17101_13460	SB17032_27080	SB17033_00095	SB17034_00815	SB17035_14520	SB17036_10900	SB17037_10835	SB17038_17730	SB17039_20100	SB17040_23770	SB17042_02025
sseA		3-mercaptopyruvate sulfurtransferase	46	46	1	99	302				845	845	845	2E151-R_14960	HBI01_20470	HBI05_06285	HBI04_23685	HBI02_10000	HBI03_09610	PS148-R_14445	PS15001_13410	PS15002_08790	PS16001_04370	PS16002_07860	PS16003_07695	PS16004_06930	PS16005_02710	PS184-R_14290	PS310-R_12075	PS378-R_11275	PS57-R_14120	RL316_09785	RL320_26160	RL97_11085	SA17021_03710	SA17022_03710	SA17023_20620	SA17024_02670	SA17101_05530	SB17032_15405	SB17033_07905	SB17034_11730	SB17035_20255	SB17036_04625	SB17037_05240	SB17038_07210	SB17039_09035	SB17040_00750	SB17042_00380
yghA		NADP(+)-dependent aldehyde reductase	46	46	1	99	9283				884	884	884	2E151-R_00660	HBI01_17410	HBI05_04475	HBI04_23075	HBI02_16495	HBI03_05620	PS148-R_01380	PS15001_09600	PS15002_21145	PS16001_09215	PS16002_25050	PS16003_01270	PS16004_04620	PS16005_07770	PS184-R_04115	PS310-R_03695	PS378-R_01380	PS57-R_01380	RL316_25500	RL320_24905	RL97_23490	SA17021_10430	SA17022_05145	SA17023_05455	SA17024_08505	SA17101_10400	SB17032_05050	SB17033_24125	SB17034_07115	SB17035_02195	SB17036_08765	SB17037_01530	SB17038_01030	SB17039_00780	SB17040_09585	SB17042_06355
kgtP		alpha-ketoglutarate permease	46	46	1	99	232				1298	1298	1298	2E151-R_15295	HBI01_20135	HBI05_11510	HBI04_24100	HBI02_13035	HBI03_00665	PS148-R_14110	PS15001_13075	PS15002_12925	PS16001_04705	PS16002_08195	PS16003_08030	PS16004_06595	PS16005_20295	PS184-R_13955	PS310-R_12410	PS378-R_11610	PS57-R_14455	RL316_09450	RL320_25825	RL97_10750	SA17021_03375	SA17022_04045	SA17023_20285	SA17024_02335	SA17101_16745	SB17032_15770	SB17033_07570	SB17034_11395	SB17035_19920	SB17036_04960	SB17037_15520	SB17038_07545	SB17039_09370	SB17040_00415	SB17042_00015
argR		transcriptional regulator ArgR	46	46	1	99	9028				470	470	470	2E151-R_01830	HBI01_07450	HBI05_13750	HBI04_02110	HBI02_03145	HBI03_19235	PS148-R_00210	PS15001_07280	PS15002_22315	PS16001_10390	PS16002_26220	PS16003_02440	PS16004_04125	PS16005_08945	PS184-R_02945	PS310-R_04865	PS378-R_00210	PS57-R_00210	RL316_26670	RL320_23735	RL97_17540	SA17021_09260	SA17022_06315	SA17023_06625	SA17024_09675	SA17101_11565	SB17032_16495	SB17033_22955	SB17034_09815	SB17035_24560	SB17036_16130	SB17037_16860	SB17038_01525	SB17039_05155	SB17040_07710	SB17042_05215
cheR		protein-glutamate O-methyltransferase CheR	46	46	1	99	9569				860	860	860	2E151-R_09810	HBI01_01080	HBI05_16015	HBI04_07235	HBI02_19740	HBI03_08085	PS148-R_09580	PS15001_03660	PS15002_16340	PS16001_07285	PS16002_20535	PS16003_20890	PS16004_16415	PS16005_20830	PS184-R_01575	PS310-R_01150	PS378-R_06850	PS57-R_12305	RL316_12165	RL320_10300	RL97_19855	SA17021_08660	SA17022_21375	SA17023_19655	SA17024_12330	SA17101_00240	SB17032_19605	SB17033_17745	SB17034_04635	SB17035_03900	SB17036_22885	SB17037_02360	SB17038_19545	SB17039_17140	SB17040_13830	SB17042_13630
tcdA		tRNA cyclic N6-threonylcarbamoyladenosine(37) synthase TcdA	46	46	1	99	7707				806	806	806	2E151-R_16670	HBI01_09260	HBI05_20940	HBI04_25030	HBI02_26810	HBI03_24190	PS148-R_15725	PS15001_06350	PS15002_00085	PS16001_01960	PS16002_17910	PS16003_18255	PS16004_20190	PS16005_07055	PS184-R_15570	PS310-R_18445	PS378-R_15935	PS57-R_15165	RL316_18640	RL320_21100	RL97_15080	SA17021_20030	SA17022_07890	SA17023_16250	SA17024_24750	SA17101_06850	SB17032_01390	SB17033_13845	SB17034_15500	SB17035_19135	SB17036_05860	SB17037_19275	SB17038_10620	SB17039_06175	SB17040_10930	SB17042_12855
yecE		UPF0759 protein YecE	46	46	1	99	9549				818	818	818	2E151-R_09895	HBI01_00995	HBI05_15935	HBI04_07150	HBI02_20310	HBI03_15695	PS148-R_09665	PS15001_03745	PS15002_16425	PS16001_07200	PS16002_20620	PS16003_20805	PS16004_16500	PS16005_20745	PS184-R_01490	PS310-R_01235	PS378-R_06935	PS57-R_12390	RL316_12250	RL320_10385	RL97_10515	SA17021_08575	SA17022_21290	SA17023_19570	SA17024_12245	SA17101_00335	SB17032_19695	SB17033_15785	SB17034_04550	SB17035_03815	SB17036_22800	SB17037_02445	SB17038_19630	SB17039_17055	SB17040_13915	SB17042_13535
yhjD		inner membrane protein YhjD	46	46	1	99	7086				1013	1013	1013	2E151-R_07235	HBI01_11155	HBI05_01370	HBI04_03515	HBI02_24155	HBI03_01055	PS148-R_05695	PS15001_12875	PS15002_11325	PS16001_01410	PS16002_00295	PS16003_04465	PS16004_05735	PS16005_00025	PS184-R_09660	PS310-R_09965	PS378-R_09160	PS57-R_05560	RL316_02450	RL320_10045	RL97_23700	SA17021_15450	SA17022_17120	SA17023_14795	SA17024_14760	SA17101_26170	SB17032_19210	SB17033_01130	SB17034_17540	SB17035_05485	SB17036_13900	SB17037_20645	SB17038_22145	SB17039_02480	SB17040_04415	SB17042_03930
caiD		crotonobetainyl-CoA hydratase	46	46	1	99	8944				785	785	785	2E151-R_10515	HBI01_16770	HBI05_11475	HBI04_04785	HBI02_18780	HBI03_18550	PS148-R_07505	PS15001_20835	PS15002_25055	PS16001_13150	PS16002_23780	PS16003_11180	PS16004_23830	PS16005_24090	PS184-R_10085	PS310-R_10385	PS378-R_10110	PS57-R_07895	RL316_06025	RL320_04090	RL97_18340	SA17021_21145	SA17022_25600	SA17023_23580	SA17024_21835	SA17101_12690	SB17032_27885	SB17033_00930	SB17034_03855	SB17035_13685	SB17036_11740	SB17037_00755	SB17038_16890	SB17039_19265	SB17040_22935	SB17042_02830
yaaJ		Uncharacterized transporter YaaJ	46	46	1	99	8675				1430	1430	1430	2E151-R_10355	HBI01_16935	HBI05_19095	HBI04_24525	HBI02_15145	HBI03_19795	PS148-R_07340	PS15001_20670	PS15002_24895	PS16001_13315	PS16002_23945	PS16003_11015	PS16004_23995	PS16005_23925	PS184-R_09920	PS310-R_10225	PS378-R_10275	PS57-R_08060	RL316_05865	RL320_03925	RL97_18180	SA17021_20980	SA17022_25435	SA17023_23745	SA17024_22000	SA17101_12525	SB17032_28050	SB17033_01095	SB17034_03695	SB17035_13520	SB17036_11905	SB17037_00590	SB17038_16725	SB17039_19100	SB17040_22770	SB17042_02990
qorA		Quinone oxidoreductase 1	46	46	1	99	2444				983	983	983	2E151-R_21265	HBI01_22295	HBI05_19665	HBI04_06625	HBI02_27120	HBI03_06295	PS148-R_21505	PS15001_02550	PS15002_12565	PS16001_08290	PS16002_02940	PS16003_04745	PS16004_17300	PS16005_12455	PS184-R_21265	PS310-R_21185	PS378-R_21730	PS57-R_21225	RL316_23665	RL320_06510	RL97_22780	SA17021_11825	SA17022_04310	SA17023_00980	SA17024_03305	SA17101_07945	SB17032_08880	SB17033_08760	SB17034_01215	SB17035_11220	SB17036_07930	SB17037_14535	SB17038_09490	SB17039_08010	SB17040_06365	SB17042_17835
yhhQ		7-cyano-7-deazaguanine/7-aminomethyl-7-deazaguanine transporter	46	46	1	99	6999				665	665	665	2E151-R_13750	HBI01_04040	HBI05_18325	HBI04_22405	HBI02_06935	HBI03_11630	PS148-R_13810	PS15001_02785	PS15002_23180	PS16001_14340	PS16002_18355	PS16003_12810	PS16004_18825	PS16005_05915	PS184-R_13315	PS310-R_15055	PS378-R_14270	PS57-R_12910	RL316_20180	RL320_14045	RL97_00655	SA17021_15775	SA17022_16800	SA17023_08340	SA17024_05205	SA17101_26455	SB17032_03380	SB17033_11505	SB17034_25705	SB17035_02835	SB17036_23420	SB17037_24880	SB17038_18145	SB17039_12060	SB17040_25100	SB17042_04385
ydcH		Uncharacterized protein YdcH	46	46	1	99	3888				224	224	224	2E151-R_22725	HBI01_14595	HBI05_09555	HBI04_01115	HBI02_19385	HBI03_13210	PS148-R_22680	PS15001_24385	PS15002_19945	PS16001_05070	PS16002_19760	PS16003_18645	PS16004_25110	PS16005_25925	PS184-R_22825	PS310-R_23010	PS378-R_23190	PS57-R_22790	RL316_12705	RL320_18615	RL97_16030	SA17021_25690	SA17022_17535	SA17023_25810	SA17024_15815	SA17101_18665	SB17032_11350	SB17033_24780	SB17034_25000	SB17035_17715	SB17036_14260	SB17037_09860	SB17038_24875	SB17039_24340	SB17040_21630	SB17042_11560
soxR		redox-sensitive transcriptional activator SoxR	46	46	1	99	2415				464	464	464	2E151-R_21125	HBI01_22155	HBI05_19730	HBI04_06485	HBI02_23530	HBI03_04265	PS148-R_21365	PS15001_02410	PS15002_12705	PS16001_08430	PS16002_03080	PS16003_04885	PS16004_18320	PS16005_12595	PS184-R_21405	PS310-R_21325	PS378-R_21590	PS57-R_21365	RL316_23525	RL320_06370	RL97_22640	SA17021_11685	SA17022_04450	SA17023_01120	SA17024_03165	SA17101_08010	SB17032_08810	SB17033_08620	SB17034_01355	SB17035_11080	SB17036_08070	SB17037_14675	SB17038_09350	SB17039_07870	SB17040_06225	SB17042_17765
galR		HTH-type transcriptional regulator GalR	46	46	1	99	7683				1031	1031	1031	2E151-R_15560	HBI01_15730	HBI05_21075	HBI04_21425	HBI02_00490	HBI03_20945	PS148-R_15280	PS15001_00175	PS15002_14115	PS16001_24205	PS16002_03650	PS16003_08255	PS16004_07110	PS16005_09775	PS184-R_15300	PS310-R_16675	PS378-R_14830	PS57-R_14895	RL316_18925	RL320_20810	RL97_05215	SA17021_20315	SA17022_12620	SA17023_03710	SA17024_24465	SA17101_06995	SB17032_01245	SB17033_14130	SB17034_15785	SB17035_18855	SB17036_05575	SB17037_12560	SB17038_10355	SB17039_05890	SB17040_10645	SB17042_12710
cecR		DNA-binding transcriptional regulator CecR	46	46	1	99	9946				671	671	671	2E151-R_02285	HBI01_12870	HBI05_07525	HBI04_26345	HBI02_24010	HBI03_09315	PS148-R_04045	PS15001_23600	PS15002_02800	PS16001_05875	PS16002_11275	PS16003_14495	PS16004_19155	PS16005_17455	PS184-R_05010	PS310-R_05315	PS378-R_05445	PS57-R_03665	RL316_17250	RL320_15275	RL97_08915	SA17021_01285	SA17022_09950	SA17023_00120	SA17024_01000	SA17101_20580	SB17032_06470	SB17033_04855	SB17034_20540	SB17035_06780	SB17036_04145	SB17037_04060	SB17038_02820	SB17039_22290	SB17040_20180	SB17042_07630
selA		L-seryl-tRNA(Sec) selenium transferase	46	46	1	99	7179				1391	1391	1391	2E151-R_07625	HBI01_10185	HBI05_16310	HBI04_13685	HBI02_12075	HBI03_12440	PS148-R_06085	PS15001_05395	PS15002_06550	PS16001_01020	PS16002_00685	PS16003_04075	PS16004_05350	PS16005_00410	PS184-R_09270	PS310-R_09575	PS378-R_08770	PS57-R_05950	RL316_02840	RL320_09655	RL97_24090	SA17021_15065	SA17022_00295	SA17023_15185	SA17024_04580	SA17101_13805	SB17032_18810	SB17033_01520	SB17034_02405	SB17035_05875	SB17036_00590	SB17037_21030	SB17038_21755	SB17039_02090	SB17040_04805	SB17042_03535
amiA		N-acetylmuramoyl-L-alanine amidase AmiA	46	46	1	99	437				869	869	869	2E151-R_24080	HBI01_25580	HBI05_01275	HBI04_16790	HBI02_08380	HBI03_23675	PS148-R_23650	PS15001_13785	PS15002_08415	PS16001_03995	PS16002_06655	PS16003_07320	PS16004_01210	PS16005_10260	PS184-R_24270	PS310-R_11460	PS378-R_10660	PS57-R_23555	RL316_10160	RL320_26535	RL97_13235	SA17021_04085	SA17022_03335	SA17023_10530	SA17024_18510	SA17101_05090	SB17032_14965	SB17033_21560	SB17034_12105	SB17035_20630	SB17036_14665	SB17037_05615	SB17038_06835	SB17039_09445	SB17040_01125	SB17042_00820
yaiI		YaiI/YqxD family protein	46	46	1	99	1929				458	464	458	2E151-R_11870	HBI01_13950	HBI05_09195	HBI04_07865	HBI02_18325	HBI03_20740	PS148-R_11590	PS15001_01210	PS15002_04665	PS16001_06420	PS16002_02255	PS16003_10225	PS16004_00805	PS16005_16790	PS184-R_11440	PS310-R_12840	PS378-R_12170	PS57-R_09985	RL316_00990	RL320_11300	RL97_14230	SA17021_05035	SA17022_23120	SA17023_10975	SA17024_07295	SA17101_14040	SB17032_02790	SB17033_09940	SB17034_09165	SB17035_01305	SB17036_06830	SB17037_24155	SB17038_25785	SB17039_11620	SB17040_17580	SB17042_15025
umuD		Protein UmuD	46	46	1	99	6002				419	419	419	2E151-R_18860	HBI01_08540	HBI05_24985	HBI04_24900	HBI02_07180	HBI03_22370	PS148-R_18105	PS15001_04930	PS15002_19140	PS16001_25860	PS16002_12955	PS16003_16705	PS16004_00180	PS16005_04405	PS184-R_17950	PS310-R_15640	PS378-R_18255	PS57-R_17550	RL316_13755	RL320_25700	RL97_21900	SA17021_24635	SA17022_18590	SA17023_02565	SA17024_20750	SA17101_03235	SB17032_12285	SB17033_07410	SB17034_13005	SB17035_16330	SB17036_09520	SB17037_19150	SB17038_00290	SB17039_25395	SB17040_04115	SB17042_10135
ybhA		bifunctional pyridoxal phosphate/fructose-1,6-bisphosphate phosphatase	46	46	1	99	9911				818	818	818	2E151-R_02135	HBI01_04970	HBI05_19590	HBI04_26500	HBI02_11020	HBI03_03785	PS148-R_03895	PS15001_12055	PS15002_09700	PS16001_16655	PS16002_09180	PS16003_09560	PS16004_13665	PS16005_10850	PS184-R_04860	PS310-R_05165	PS378-R_05595	PS57-R_03815	RL316_17400	RL320_15425	RL97_08765	SA17021_01545	SA17022_06865	SA17023_12555	SA17024_01150	SA17101_20425	SB17032_06315	SB17033_05005	SB17034_20690	SB17035_06930	SB17036_03995	SB17037_11510	SB17038_02970	SB17039_22140	SB17040_20330	SB17042_07480
yhhT		Putative transport protein YhhT	46	46	1	99	7002				1049	1049	1049	2E151-R_13735	HBI01_04055	HBI05_18310	HBI04_22390	HBI02_06920	HBI03_11615	PS148-R_13825	PS15001_02770	PS15002_23195	PS16001_14355	PS16002_18340	PS16003_12795	PS16004_18810	PS16005_05900	PS184-R_13300	PS310-R_15070	PS378-R_14285	PS57-R_12895	RL316_20195	RL320_14060	RL97_00670	SA17021_15760	SA17022_16815	SA17023_08355	SA17024_05190	SA17101_26440	SB17032_03365	SB17033_11520	SB17034_25690	SB17035_02820	SB17036_23405	SB17037_24865	SB17038_18130	SB17039_12075	SB17040_25085	SB17042_04370
nhaA		Na+/H+ antiporter NhaA	46	46	1	99	8687				1166	1166	1166	2E151-R_10425	HBI01_16865	HBI05_19150	HBI04_04260	HBI02_20275	HBI03_14755	PS148-R_07410	PS15001_20740	PS15002_24965	PS16001_13245	PS16002_23875	PS16003_11085	PS16004_23925	PS16005_23995	PS184-R_09990	PS310-R_10295	PS378-R_10205	PS57-R_07990	RL316_05935	RL320_03995	RL97_18250	SA17021_21050	SA17022_25505	SA17023_23675	SA17024_21930	SA17101_12580	SB17032_27995	SB17033_01025	SB17034_03765	SB17035_13590	SB17036_11835	SB17037_00660	SB17038_16795	SB17039_19170	SB17040_22840	SB17042_02935
phoE		phosphoporin PhoE	46	46	1	99	3663				1055	1055	1055	2E151-R_22970	HBI01_19005	HBI05_18525	HBI04_10395	HBI02_09920	HBI03_03935	PS148-R_22875	PS15001_17455	PS15002_19480	PS16001_10715	PS16002_07270	PS16003_18885	PS16004_20970	PS16005_17965	PS184-R_23070	PS310-R_23295	PS378-R_23435	PS57-R_22985	RL316_04310	RL320_03465	RL97_20310	SA17021_23840	SA17022_22745	SA17023_21795	SA17024_06570	SA17101_15400	SB17032_05910	SB17033_22535	SB17034_06075	SB17035_23020	SB17036_00155	SB17037_11080	SB17038_11725	SB17039_05485	SB17040_26130	SB17042_23505
ilvD		dihydroxy-acid dehydratase	46	46	1	99	4398				1850	1850	1850	2E151-R_18550	HBI01_21170	HBI05_00370	HBI04_16255	HBI02_23435	HBI03_15295	PS148-R_18915	PS15001_23770	PS15002_16720	PS16001_15475	PS16002_24710	PS16003_02985	PS16004_22520	PS16005_01015	PS184-R_18760	PS310-R_19845	PS378-R_18665	PS57-R_18355	RL316_10850	RL320_00870	RL97_12735	SA17021_23325	SA17022_13185	SA17023_22295	SA17024_13800	SA17101_09370	SB17032_00790	SB17033_24925	SB17034_21930	SB17035_26170	SB17036_17085	SB17037_23475	SB17038_15765	SB17039_14965	SB17040_12630	SB17042_17625
lplT		lysophospholipid transporter LplT	46	46	1	99	7685				1193	1193	1193	2E151-R_15540	HBI01_15710	HBI05_21055	HBI04_21405	HBI02_00470	HBI03_20925	PS148-R_15260	PS15001_00155	PS15002_14095	PS16001_24225	PS16002_03630	PS16003_08235	PS16004_07090	PS16005_09795	PS184-R_15320	PS310-R_16655	PS378-R_14810	PS57-R_14915	RL316_18905	RL320_20830	RL97_05195	SA17021_20295	SA17022_12640	SA17023_03690	SA17024_24485	SA17101_06975	SB17032_01265	SB17033_14110	SB17034_15765	SB17035_18875	SB17036_05595	SB17037_12540	SB17038_10375	SB17039_05910	SB17040_10665	SB17042_12730
glcF		glycolate oxidase subunit GlcF	46	46	1	99	8413				1223	1223	1223	2E151-R_00495	HBI01_17575	HBI05_04305	HBI04_25570	HBI02_21670	HBI03_01430	PS148-R_01545	PS15001_09435	PS15002_20980	PS16001_09050	PS16002_24885	PS16003_01105	PS16004_04785	PS16005_07605	PS184-R_04280	PS310-R_03530	PS378-R_01545	PS57-R_01545	RL316_25335	RL320_25070	RL97_23655	SA17021_10595	SA17022_04980	SA17023_05290	SA17024_08340	SA17101_18350	SB17032_04885	SB17033_24290	SB17034_07280	SB17035_02030	SB17036_08600	SB17037_01695	SB17038_01195	SB17039_00945	SB17040_09420	SB17042_06520
cbpA		curved DNA-binding protein	46	46	1	99	737				920	920	920	2E151-R_03245	HBI01_01890	HBI05_14410	HBI04_10715	HBI02_15465	HBI03_21590	PS148-R_05005	PS15001_22640	PS15002_01840	PS16001_18075	PS16002_10315	PS16003_15455	PS16004_19995	PS16005_18835	PS184-R_05970	PS310-R_06275	PS378-R_04485	PS57-R_02705	RL316_24700	RL320_23425	RL97_06430	SA17021_00325	SA17022_08990	SA17023_01780	SA17024_16605	SA17101_02460	SB17032_21885	SB17033_03020	SB17034_19580	SB17035_04795	SB17036_10290	SB17037_03100	SB17038_12820	SB17039_23250	SB17040_19220	SB17042_15125
csiR		DNA-binding transcriptional regulator CsiR	46	46	1	99	8008				662	662	662	2E151-R_21815	HBI01_02860	HBI05_00050	HBI04_15900	HBI02_11635	HBI03_07100	PS148-R_21745	PS15001_10570	PS15002_17745	PS16001_26375	PS16002_07575	PS16003_24290	PS16004_10850	PS16005_03070	PS184-R_21895	PS310-R_22540	PS378-R_22280	PS57-R_21855	RL316_17805	RL320_05775	RL97_16585	SA17021_11110	SA17022_14775	SA17023_14410	SA17024_06245	SA17101_06050	SB17032_02165	SB17033_13010	SB17034_17740	SB17035_11580	SB17036_13370	SB17037_13910	SB17038_14440	SB17039_20980	SB17040_16710	SB17042_16710
mgsA		methylglyoxal synthase	46	46	1	99	781				458	458	458	2E151-R_03090	HBI01_01735	HBI05_14265	HBI04_10555	HBI02_15320	HBI03_21435	PS148-R_04850	PS15001_22795	PS15002_01995	PS16001_18230	PS16002_10470	PS16003_15300	PS16004_14390	PS16005_18990	PS184-R_05815	PS310-R_06120	PS378-R_04640	PS57-R_02860	RL316_16445	RL320_14470	RL97_06275	SA17021_00480	SA17022_09145	SA17023_01625	SA17024_16450	SA17101_02280	SB17032_21710	SB17033_03175	SB17034_19735	SB17035_04640	SB17036_10445	SB17037_03255	SB17038_12975	SB17039_23095	SB17040_19375	SB17042_15300
yobD		UPF0266 membrane protein YobD	46	46	1	99	9481				458	458	458	2E151-R_05565	HBI01_19860	HBI05_24060	HBI04_17625	HBI02_22115	HBI03_16565	PS148-R_09925	PS15001_24570	PS15002_06865	PS16001_21345	PS16002_20890	PS16003_24705	PS16004_25645	PS16005_20475	PS184-R_01220	PS310-R_01505	PS378-R_07205	PS57-R_09515	RL316_21420	RL320_00075	RL97_03505	SA17021_08305	SA17022_21020	SA17023_19305	SA17024_11975	SA17101_00680	SB17032_19965	SB17033_25885	SB17034_04280	SB17035_08965	SB17036_19345	SB17037_07285	SB17038_19900	SB17039_16785	SB17040_14185	SB17042_13265
rpsQ		30S ribosomal protein S17	46	46	1	99	6816				254	254	254	2E151-R_23790	HBI01_09335	HBI05_17415	HBI04_05470	HBI02_12805	HBI03_21775	PS148-R_23460	PS15001_18745	PS15002_17400	PS16001_18705	PS16002_22690	PS16003_23320	PS16004_25455	PS16005_22450	PS184-R_23890	PS310-R_24115	PS378-R_24255	PS57-R_23725	RL316_02045	RL320_03075	RL97_02760	SA17021_17800	SA17022_16020	SA17023_25345	SA17024_14265	SA17101_08780	SB17032_06850	SB17033_20980	SB17034_24765	SB17035_25495	SB17036_21145	SB17037_10280	SB17038_18925	SB17039_10905	SB17040_17165	SB17042_24615
thiC		phosphomethylpyrimidine synthase ThiC	46	46	1	99	6762				1895	1895	1895	2E151-R_24965	HBI01_15360	HBI05_14015	HBI04_15170	HBI02_14870	HBI03_13980	PS148-R_24705	PS15001_11810	PS15002_11705	PS16001_13625	PS16002_12675	PS16003_13995	PS16004_21925	PS16005_23090	PS184-R_25105	PS310-R_24930	PS378-R_25075	PS57-R_24930	RL316_16140	RL320_17965	RL97_10365	SA17021_16530	SA17022_15790	SA17023_24430	SA17024_15645	SA17101_16220	SB17032_10905	SB17033_19750	SB17034_17265	SB17035_12920	SB17036_17400	SB17037_15945	SB17038_20335	SB17039_13235	SB17040_16225	SB17042_23960
yciV		5'-3' exoribonuclease	46	46	1	99	6127				881	881	881	2E151-R_16855	HBI01_08075	HBI05_25455	HBI04_00615	HBI02_02720	HBI03_15760	PS148-R_16575	PS15001_04460	PS15002_18670	PS16001_25390	PS16002_08925	PS16003_17175	PS16004_12290	PS16005_04875	PS184-R_16420	PS310-R_18940	PS378-R_16435	PS57-R_16015	RL316_13285	RL320_25230	RL97_21430	SA17021_25105	SA17022_18120	SA17023_03035	SA17024_20280	SA17101_19350	SB17032_12005	SB17033_06940	SB17034_13215	SB17035_16800	SB17036_09990	SB17037_18680	SB17038_00760	SB17039_24925	SB17040_03645	SB17042_12215
gltD		glutamate synthase subunit GltD	46	46	1	99	9046				1418	1418	1418	2E151-R_01750	HBI01_07370	HBI05_13660	HBI04_02030	HBI02_24665	HBI03_19155	PS148-R_00290	PS15001_07200	PS15002_22235	PS16001_10310	PS16002_26140	PS16003_02360	PS16004_04045	PS16005_08865	PS184-R_03025	PS310-R_04785	PS378-R_00290	PS57-R_00290	RL316_26590	RL320_23815	RL97_17460	SA17021_09340	SA17022_06235	SA17023_06545	SA17024_09595	SA17101_11475	SB17032_16585	SB17033_23035	SB17034_10050	SB17035_24480	SB17036_16210	SB17037_16780	SB17038_01605	SB17039_05075	SB17040_07790	SB17042_05305
dinI		DNA damage-inducible protein I	46	46	1	99	671				245	245	245	2E151-R_03530	HBI01_23735	HBI05_14685	HBI04_12330	HBI02_00440	HBI03_02490	PS148-R_05290	PS15001_22355	PS15002_01555	PS16001_17795	PS16002_10030	PS16003_12350	PS16004_19710	PS16005_18550	PS184-R_06255	PS310-R_06560	PS378-R_04200	PS57-R_02420	RL316_24415	RL320_23140	RL97_06715	SA17021_00195	SA17022_08705	SA17023_02065	SA17024_16890	SA17101_02725	SB17032_04335	SB17033_02735	SB17034_19295	SB17035_05080	SB17036_10005	SB17037_02815	SB17038_12535	SB17039_23535	SB17040_18935	SB17042_09645
potI		putrescine ABC transporter permease PotI	46	46	1	99	10014				845	845	845	2E151-R_02600	HBI01_13185	HBI05_07170	HBI04_05095	HBI02_16740	HBI03_11390	PS148-R_04360	PS15001_23285	PS15002_02485	PS16001_05560	PS16002_10960	PS16003_14810	PS16004_14880	PS16005_19660	PS184-R_05325	PS310-R_05630	PS378-R_05130	PS57-R_03350	RL316_16935	RL320_14960	RL97_09230	SA17021_00970	SA17022_09635	SA17023_00435	SA17024_00685	SA17101_01725	SB17032_23225	SB17033_04540	SB17034_20225	SB17035_06465	SB17036_04460	SB17037_03745	SB17038_02505	SB17039_22605	SB17040_19865	SB17042_18755
ilvI		acetolactate synthase 3 large subunit	46	46	1	99	8895				1724	1724	1724	2E151-R_10755	HBI01_16530	HBI05_11260	HBI04_20275	HBI02_07785	HBI03_14375	PS148-R_07745	PS15001_12550	PS15002_25295	PS16001_12910	PS16002_23540	PS16003_11420	PS16004_23590	PS16005_24330	PS184-R_10325	PS310-R_10625	PS378-R_09870	PS57-R_07655	RL316_06265	RL320_04330	RL97_18580	SA17021_21385	SA17022_25840	SA17023_23340	SA17024_21595	SA17101_12900	SB17032_27660	SB17033_00690	SB17034_00220	SB17035_13925	SB17036_11500	SB17037_00995	SB17038_17135	SB17039_19505	SB17040_23175	SB17042_02605
ycaO		30S ribosomal protein S12 methylthiotransferase accessory factor YcaO	46	46	1	99	843				1760	1760	1760	2E151-R_02835	HBI01_01480	HBI05_04840	HBI04_00080	HBI02_18855	HBI03_21180	PS148-R_04595	PS15001_23050	PS15002_02250	PS16001_05325	PS16002_10725	PS16003_15045	PS16004_14645	PS16005_02085	PS184-R_05560	PS310-R_05865	PS378-R_04895	PS57-R_03115	RL316_16700	RL320_14725	RL97_07560	SA17021_00735	SA17022_09400	SA17023_16265	SA17024_16195	SA17101_01980	SB17032_21410	SB17033_03430	SB17034_19990	SB17035_04385	SB17036_10700	SB17037_03510	SB17038_13230	SB17039_22840	SB17040_19630	SB17042_15605
hcxB		hydroxycarboxylate dehydrogenase HcXB	46	46	1	99	9954				1085	1085	1085	2E151-R_02310	HBI01_12895	HBI05_07495	HBI04_26325	HBI02_23980	HBI03_09290	PS148-R_04070	PS15001_23575	PS15002_02775	PS16001_05850	PS16002_11250	PS16003_14520	PS16004_19130	PS16005_17430	PS184-R_05035	PS310-R_05340	PS378-R_05420	PS57-R_03640	RL316_17225	RL320_15250	RL97_08940	SA17021_01260	SA17022_09925	SA17023_00145	SA17024_00975	SA17101_20610	SB17032_06505	SB17033_04830	SB17034_20515	SB17035_06755	SB17036_04170	SB17037_04035	SB17038_02795	SB17039_22315	SB17040_20155	SB17042_07665
grxA		glutaredoxin 1	46	46	1	99	10006				257	257	257	2E151-R_02560	HBI01_13145	HBI05_07210	HBI04_05055	HBI02_16780	HBI03_11430	PS148-R_04320	PS15001_23325	PS15002_02525	PS16001_05600	PS16002_11000	PS16003_14770	PS16004_14920	PS16005_19620	PS184-R_05285	PS310-R_05590	PS378-R_05170	PS57-R_03390	RL316_16975	RL320_15000	RL97_09190	SA17021_01010	SA17022_09675	SA17023_00395	SA17024_00725	SA17101_01685	SB17032_23180	SB17033_04580	SB17034_20265	SB17035_06505	SB17036_04420	SB17037_03785	SB17038_02545	SB17039_22565	SB17040_19905	SB17042_18795
bcp		thioredoxin-dependent thiol peroxidase	46	46	1	99	397				470	470	470	2E151-R_14545	HBI01_25375	HBI05_11930	HBI04_08490	HBI02_08175	HBI03_21120	PS148-R_14860	PS15001_13580	PS15002_08620	PS16001_04200	PS16002_06980	PS16003_07525	PS16004_01415	PS16005_10055	PS184-R_14705	PS310-R_11660	PS378-R_10860	PS57-R_13705	RL316_09955	RL320_26330	RL97_11255	SA17021_03880	SA17022_03540	SA17023_22030	SA17024_17455	SA17101_05305	SB17032_15170	SB17033_08075	SB17034_11900	SB17035_20425	SB17036_14460	SB17037_05410	SB17038_07040	SB17039_08865	SB17040_00920	SB17042_00615
gph		phosphoglycolate phosphatase	46	46	1	99	6899				758	758	758	2E151-R_14180	HBI01_03610	HBI05_17695	HBI04_11275	HBI02_12360	HBI03_23200	PS148-R_13380	PS15001_03215	PS15002_22750	PS16001_13910	PS16002_18785	PS16003_13240	PS16004_14160	PS16005_06345	PS184-R_13745	PS310-R_14625	PS378-R_13840	PS57-R_13340	RL316_19750	RL320_13615	RL97_00225	SA17021_16205	SA17022_16370	SA17023_07910	SA17024_05635	SA17101_15195	SB17032_03835	SB17033_11075	SB17034_16655	SB17035_03265	SB17036_23850	SB17037_25310	SB17038_18575	SB17039_13520	SB17040_25530	SB17042_04840
rffM		lipopolysaccharide N-acetylmannosaminouronosyltransferase	46	46	1	99	4424				740	740	740	2E151-R_18420	HBI01_21040	HBI05_00260	HBI04_16150	HBI02_23330	HBI03_15190	PS148-R_18785	PS15001_23900	PS15002_16850	PS16001_15605	PS16002_24580	PS16003_02855	PS16004_22390	PS16005_00885	PS184-R_18630	PS310-R_19975	PS378-R_18795	PS57-R_18225	RL316_10980	RL320_01000	RL97_12865	SA17021_23455	SA17022_13315	SA17023_22425	SA17024_13670	SA17101_09485	SB17032_00675	SB17033_25055	SB17034_22060	SB17035_26040	SB17036_16955	SB17037_23345	SB17038_15635	SB17039_14835	SB17040_12500	SB17042_17515
yecD		hydrolase	46	46	1	99	9548				566	566	566	2E151-R_09900	HBI01_00990	HBI05_15930	HBI04_07145	HBI02_20305	HBI03_15690	PS148-R_09670	PS15001_03750	PS15002_16430	PS16001_07195	PS16002_20625	PS16003_20800	PS16004_16505	PS16005_20740	PS184-R_01485	PS310-R_01240	PS378-R_06940	PS57-R_12395	RL316_12255	RL320_10390	RL97_10520	SA17021_08570	SA17022_21285	SA17023_19565	SA17024_12240	SA17101_00340	SB17032_19700	SB17033_15780	SB17034_04545	SB17035_03810	SB17036_22795	SB17037_02450	SB17038_19635	SB17039_17050	SB17040_13920	SB17042_13530
pabC		aminodeoxychorismate lyase	46	46	1	99	635				809	809	809	2E151-R_03705	HBI01_23560	HBI05_14870	HBI04_12155	HBI02_18040	HBI03_02315	PS148-R_05465	PS15001_22180	PS15002_01380	PS16001_11935	PS16002_09855	PS16003_15965	PS16004_19535	PS16005_21365	PS184-R_06430	PS310-R_06735	PS378-R_04025	PS57-R_02245	RL316_24240	RL320_22965	RL97_06890	SA17021_13910	SA17022_08530	SA17023_02240	SA17024_17070	SA17101_02900	SB17032_04510	SB17033_02560	SB17034_19120	SB17035_05255	SB17036_17620	SB17037_02640	SB17038_12360	SB17039_04140	SB17040_18760	SB17042_09820
norR		nitric oxide reductase transcriptional regulator NorR	46	46	1	99	8052				1514	1514	1514	2E151-R_16075	HBI01_08720	HBI05_15425	HBI04_21100	HBI02_17595	HBI03_10715	PS148-R_16320	PS15001_10335	PS15002_17980	PS16001_17310	PS16002_15125	PS16003_24525	PS16004_18490	PS16005_11705	PS184-R_16160	PS310-R_17855	PS378-R_15345	PS57-R_15760	RL316_18045	RL320_05535	RL97_11615	SA17021_10875	SA17022_15020	SA17023_14650	SA17024_06005	SA17101_06275	SB17032_01935	SB17033_13250	SB17034_14095	SB17035_22820	SB17036_13125	SB17037_14155	SB17038_14685	SB17039_20735	SB17040_16465	SB17042_16940
fdnH		formate dehydrogenase N subunit beta	46	46	1	99	3238				884	884	884	2E151-R_25095	HBI01_12615	HBI05_06930	HBI04_12985	HBI02_26470	HBI03_20725	PS148-R_24985	PS15001_19210	PS15002_19725	PS16001_20970	PS16002_12820	PS16003_16545	PS16004_17005	PS16005_22680	PS184-R_25240	PS310-R_25045	PS378-R_25190	PS57-R_25040	RL316_04140	RL320_10685	RL97_12140	SA17021_22140	SA17022_19295	SA17023_26280	SA17024_18650	SA17101_25430	SB17032_25540	SB17033_21815	SB17034_05295	SB17035_10170	SB17036_18330	SB17037_17380	SB17038_15165	SB17039_08680	SB17040_18200	SB17042_22415
kefC		glutathione-regulated potassium-efflux system protein KefC	46	46	1	99	8933				1862	1862	1862	2E151-R_10570	HBI01_16715	HBI05_11420	HBI04_04730	HBI02_18725	HBI03_05025	PS148-R_07560	PS15001_20890	PS15002_25110	PS16001_13095	PS16002_23725	PS16003_11235	PS16004_23775	PS16005_24145	PS184-R_10140	PS310-R_10440	PS378-R_10055	PS57-R_07840	RL316_06080	RL320_04145	RL97_18395	SA17021_21200	SA17022_25655	SA17023_23525	SA17024_21780	SA17101_12745	SB17032_27830	SB17033_00875	SB17034_00035	SB17035_13740	SB17036_11685	SB17037_00810	SB17038_16945	SB17039_19320	SB17040_22990	SB17042_02775
hybG		hydrogenase maturation factor HybG	46	46	1	99	9298				248	248	248	2E151-R_00600	HBI01_17470	HBI05_04415	HBI04_23015	HBI02_16565	HBI03_05555	PS148-R_01440	PS15001_09540	PS15002_21085	PS16001_09155	PS16002_24990	PS16003_01210	PS16004_04680	PS16005_07710	PS184-R_04175	PS310-R_03635	PS378-R_01440	PS57-R_01440	RL316_25440	RL320_24965	RL97_23550	SA17021_10490	SA17022_05085	SA17023_05395	SA17024_08445	SA17101_10340	SB17032_04990	SB17033_24185	SB17034_07175	SB17035_02135	SB17036_08705	SB17037_01590	SB17038_01090	SB17039_00840	SB17040_09525	SB17042_06415
bamB		outer membrane protein assembly factor BamB	46	46	1	99	314				1178	1178	1178	2E151-R_14910	HBI01_20520	HBI05_06235	HBI04_23635	HBI02_09950	HBI03_09560	PS148-R_14495	PS15001_13460	PS15002_08740	PS16001_04320	PS16002_07810	PS16003_07645	PS16004_06980	PS16005_02660	PS184-R_14340	PS310-R_12025	PS378-R_11225	PS57-R_14070	RL316_09835	RL320_26210	RL97_11135	SA17021_03760	SA17022_03660	SA17023_20670	SA17024_02720	SA17101_05480	SB17032_15335	SB17033_07955	SB17034_11780	SB17035_20305	SB17036_04575	SB17037_05290	SB17038_07160	SB17039_08985	SB17040_00800	SB17042_00450
uxuB		D-mannonate oxidoreductase	46	46	1	99	8566				1460	1460	1460	2E151-R_13170	HBI01_11610	HBI05_24330	HBI04_00895	HBI02_04380	HBI03_00015	PS148-R_12425	PS15001_07735	PS15002_24130	PS16001_19920	PS16002_19210	PS16003_22140	PS16004_12090	PS16005_16200	PS184-R_12735	PS310-R_13680	PS378-R_13345	PS57-R_11280	RL316_05195	RL320_16585	RL97_01825	SA17021_24050	SA17022_24605	SA17023_16470	SA17024_22820	SA17101_24855	SB17032_28485	SB17033_03620	SB17034_02870	SB17035_01845	SB17036_12725	SB17037_13410	SB17038_15900	SB17039_18280	SB17040_21945	SB17042_03485
gcl		glyoxylate carboligase	46	46	1	99	2077				1781	1781	1781	2E151-R_24685	HBI01_12410	HBI05_15250	HBI04_21975	HBI02_12630	HBI03_14075	PS148-R_24565	PS15001_18140	PS15002_14805	PS16001_15975	PS16002_06785	PS16003_15695	PS16004_16755	PS16005_22200	PS184-R_24155	PS310-R_24785	PS378-R_24800	PS57-R_24650	RL316_20910	RL320_01530	RL97_19370	SA17021_23155	SA17022_23745	SA17023_20100	SA17024_18895	SA17101_09830	SB17032_26325	SB17033_12565	SB17034_13945	SB17035_14755	SB17036_18435	SB17037_25590	SB17038_25160	SB17039_25525	SB17040_25910	SB17042_18245
pstA		phosphate ABC transporter permease PstA	46	46	1	99	4689				890	890	890	2E151-R_08485	HBI01_09875	HBI05_22145	HBI04_23225	HBI02_20510	HBI03_12915	PS148-R_06945	PS15001_11205	PS15002_15305	PS16001_00160	PS16002_01545	PS16003_24105	PS16004_09265	PS16005_01755	PS184-R_08410	PS310-R_08715	PS378-R_07910	PS57-R_06810	RL316_01575	RL320_07400	RL97_07935	SA17021_14205	SA17022_01155	SA17023_05020	SA17024_03720	SA17101_00990	SB17032_12800	SB17033_02380	SB17034_13420	SB17035_10370	SB17036_01450	SB17037_21890	SB17038_11460	SB17039_01230	SB17040_05665	SB17042_15780
tamB		autotransporter assembly complex protein TamB	46	46	1	99	6563				3779	3779	3779	2E151-R_12755	HBI01_02325	HBI05_02950	HBI04_10080	HBI02_04850	HBI03_12070	PS148-R_12840	PS15001_17815	PS15002_05455	PS16001_20330	PS16002_04825	PS16003_22550	PS16004_08915	PS16005_15720	PS184-R_12325	PS310-R_14090	PS378-R_12930	PS57-R_10870	RL316_09080	RL320_02460	RL97_15355	SA17021_05935	SA17022_10785	SA17023_13695	SA17024_23230	SA17101_24160	SB17032_08400	SB17033_10615	SB17034_08320	SB17035_00585	SB17036_24710	SB17037_04760	SB17038_13975	SB17039_06895	SB17040_06915	SB17042_19110
nhaB		Na(+)/H(+) antiporter NhaB	46	46	1	99	6005				1541	1541	1541	2E151-R_18875	HBI01_08525	HBI05_25000	HBI04_24885	HBI02_07195	HBI03_22355	PS148-R_18120	PS15001_04915	PS15002_19125	PS16001_25845	PS16002_12940	PS16003_16720	PS16004_00165	PS16005_04420	PS184-R_17965	PS310-R_15625	PS378-R_18240	PS57-R_17565	RL316_13740	RL320_25685	RL97_21885	SA17021_24650	SA17022_18575	SA17023_02580	SA17024_20735	SA17101_03250	SB17032_12300	SB17033_07395	SB17034_12990	SB17035_16345	SB17036_09535	SB17037_19135	SB17038_00305	SB17039_25380	SB17040_04100	SB17042_10155
ushA		bifunctional UDP-sugar hydrolase/5'-nucleotidase	46	46	1	99	2028				1652	1652	1652	2E151-R_12350	HBI01_14430	HBI05_12845	HBI04_08345	HBI02_26290	HBI03_22695	PS148-R_12070	PS15001_01690	PS15002_04185	PS16001_06900	PS16002_01775	PS16003_10705	PS16004_00325	PS16005_17275	PS184-R_11920	PS310-R_13320	PS378-R_11690	PS57-R_10465	RL316_00510	RL320_10820	RL97_13750	SA17021_04555	SA17022_23600	SA17023_12110	SA17024_07775	SA17101_14530	SB17032_00185	SB17033_09460	SB17034_08685	SB17035_08185	SB17036_06350	SB17037_23675	SB17038_25305	SB17039_11140	SB17040_00335	SB17042_14530
rsmC		16S rRNA (guanine(1207)-N(2))-methyltransferase RsmC	46	46	1	99	8629				1031	1031	1031	2E151-R_23075	HBI01_11905	HBI05_18875	HBI04_22805	HBI02_10665	HBI03_08995	PS148-R_25875	PS15001_18440	PS15002_24425	PS16001_19620	PS16002_19515	PS16003_21840	PS16004_20780	PS16005_23500	PS184-R_23175	PS310-R_23400	PS378-R_23820	PS57-R_25850	RL316_05495	RL320_16280	RL97_01525	SA17021_24350	SA17022_24910	SA17023_21345	SA17024_22515	SA17101_25180	SB17032_28280	SB17033_03920	SB17034_03175	SB17035_12995	SB17036_12425	SB17037_00070	SB17038_16200	SB17039_18580	SB17040_22245	SB17042_03220
tas		NADP(H)-dependent aldo-keto reductase	46	46	1	99	7686				1040	1040	1040	2E151-R_15535	HBI01_15705	HBI05_21050	HBI04_21400	HBI02_00465	HBI03_20920	PS148-R_15255	PS15001_00150	PS15002_14090	PS16001_24230	PS16002_03625	PS16003_08230	PS16004_07085	PS16005_09800	PS184-R_15325	PS310-R_16650	PS378-R_14805	PS57-R_14920	RL316_18900	RL320_20835	RL97_05190	SA17021_20290	SA17022_12645	SA17023_03685	SA17024_24490	SA17101_06970	SB17032_01270	SB17033_14105	SB17034_15760	SB17035_18880	SB17036_05600	SB17037_12535	SB17038_10380	SB17039_05915	SB17040_10670	SB17042_12735
adrA		diguanylate cyclase AdrA	46	46	1	99	1927				1115	1115	1115	2E151-R_11860	HBI01_13940	HBI05_09205	HBI04_07855	HBI02_18335	HBI03_20750	PS148-R_11580	PS15001_01200	PS15002_04675	PS16001_06410	PS16002_02265	PS16003_10215	PS16004_00815	PS16005_16780	PS184-R_11430	PS310-R_12830	PS378-R_12180	PS57-R_09975	RL316_01000	RL320_11310	RL97_14240	SA17021_05045	SA17022_23110	SA17023_10985	SA17024_07285	SA17101_14030	SB17032_02780	SB17033_09950	SB17034_09175	SB17035_01295	SB17036_06840	SB17037_24165	SB17038_25795	SB17039_11630	SB17040_17590	SB17042_15035
ygcW		Uncharacterized oxidoreductase YgcW	46	46	1	99	8134				785	785	785	2E151-R_16450	HBI01_09040	HBI05_20735	HBI04_19135	HBI02_17930	HBI03_18340	PS148-R_15945	PS15001_06130	PS15002_00305	PS16001_01740	PS16002_17690	PS16003_18035	PS16004_11505	PS16005_07275	PS184-R_15790	PS310-R_18225	PS378-R_15715	PS57-R_15385	RL316_18420	RL320_21320	RL97_14860	SA17021_19810	SA17022_08110	SA17023_16030	SA17024_24970	SA17101_06640	SB17032_01605	SB17033_13625	SB17034_15280	SB17035_19355	SB17036_06080	SB17037_19495	SB17038_10840	SB17039_06395	SB17040_11150	SB17042_13070
pnuC		nicotinamide riboside transporter PnuC	46	46	1	99	9895				719	719	719	2E151-R_02060	HBI01_04895	HBI05_19515	HBI04_26575	HBI02_10945	HBI03_03710	PS148-R_03820	PS15001_12130	PS15002_09775	PS16001_16730	PS16002_09255	PS16003_09485	PS16004_13740	PS16005_10925	PS184-R_04785	PS310-R_05090	PS378-R_05670	PS57-R_03890	RL316_08345	RL320_22635	RL97_08690	SA17021_01620	SA17022_06790	SA17023_12630	SA17024_01225	SA17101_20350	SB17032_06240	SB17033_05080	SB17034_20765	SB17035_07005	SB17036_03920	SB17037_11585	SB17038_03045	SB17039_22065	SB17040_20405	SB17042_07405
copA		copper-exporting P-type ATPase CopA	46	46	1	99	2034				2504	2504	2504	2E151-R_12380	HBI01_14460	HBI05_12865	HBI04_08385	HBI02_26310	HBI03_22735	PS148-R_12100	PS15001_01720	PS15002_04155	PS16001_06930	PS16002_01745	PS16003_10735	PS16004_00295	PS16005_17305	PS184-R_11950	PS310-R_13350	PS378-R_11660	PS57-R_10495	RL316_00480	RL320_10790	RL97_13720	SA17021_04525	SA17022_23630	SA17023_12140	SA17024_07805	SA17101_14555	SB17032_23010	SB17033_09430	SB17034_08655	SB17035_08155	SB17036_06320	SB17037_23645	SB17038_25275	SB17039_11110	SB17040_00365	SB17042_18105
yijO		Uncharacterized HTH-type transcriptional regulator YijO	46	46	1	99	934				851	851	851	2E151-R_20155	HBI01_25810	HBI05_18790	HBI04_07745	HBI02_13545	HBI03_05255	PS148-R_20575	PS15001_16005	PS15002_00590	PS16001_11005	PS16002_05215	PS16003_00400	PS16004_06545	PS16005_04095	PS184-R_20255	PS310-R_17195	PS378-R_20620	PS57-R_19800	RL316_04015	RL320_16095	RL97_12530	SA17021_16700	SA17022_11425	SA17023_07640	SA17024_12880	SA17101_22295	SB17032_09080	SB17033_06350	SB17034_23985	SB17035_09520	SB17036_07470	SB17037_09540	SB17038_04230	SB17039_00590	SB17040_09015	SB17042_20225
yejL		UPF0352 protein YejL	46	46	1	99	10369				227	227	227	2E151-R_04505	HBI01_18155	HBI05_22975	HBI04_17335	HBI02_09360	HBI03_11130	PS148-R_02785	PS15001_14965	PS15002_03720	PS16001_02815	PS16002_15330	PS16003_06135	PS16004_02710	PS16005_14770	PS184-R_07665	PS310-R_07535	PS378-R_02785	PS57-R_04945	RL316_15215	RL320_12885	RL97_05645	SA17021_13110	SA17022_02155	SA17023_09345	SA17024_20205	SA17101_03895	SB17032_24110	SB17033_18710	SB17034_18490	SB17035_21815	SB17036_03055	SB17037_06800	SB17038_05655	SB17039_03210	SB17040_02305	SB17042_08010
ybbP		Uncharacterized ABC transporter permease YbbP	46	46	1	99	2067				2414	2414	2414	2E151-R_24725	HBI01_12450	HBI05_15215	HBI04_03855	HBI02_12595	HBI03_22810	PS148-R_24605	PS15001_18100	PS15002_14765	PS16001_16015	PS16002_06750	PS16003_15735	PS16004_16790	PS16005_22235	PS184-R_24195	PS310-R_24745	PS378-R_24840	PS57-R_24690	RL316_20870	RL320_01490	RL97_19325	SA17021_23115	SA17022_23705	SA17023_20060	SA17024_18855	SA17101_14615	SB17032_07310	SB17033_12605	SB17034_13985	SB17035_11740	SB17036_18160	SB17037_25550	SB17038_25200	SB17039_25485	SB17040_25950	SB17042_18210
aphA		acid phosphatase AphA	46	46	1	99	2429				713	713	713	2E151-R_21165	HBI01_22195	HBI05_19690	HBI04_06525	HBI02_23570	HBI03_04305	PS148-R_21405	PS15001_02450	PS15002_12665	PS16001_08390	PS16002_03040	PS16003_04845	PS16004_18360	PS16005_12555	PS184-R_21365	PS310-R_21285	PS378-R_21630	PS57-R_21325	RL316_23565	RL320_06410	RL97_22680	SA17021_11725	SA17022_04410	SA17023_01080	SA17024_03205	SA17101_07970	SB17032_08855	SB17033_08660	SB17034_01315	SB17035_11120	SB17036_08030	SB17037_14635	SB17038_09390	SB17039_07910	SB17040_06265	SB17042_17810
tatA		Sec-independent protein translocase subunit TatA	46	46	1	99	4354				269	269	269	2E151-R_18095	HBI01_22870	HBI05_20455	HBI04_00790	HBI02_20010	HBI03_13670	PS148-R_18460	PS15001_24220	PS15002_23575	PS16001_24620	PS16002_24250	PS16003_26495	PS16004_22060	PS16005_26090	PS184-R_18305	PS310-R_20300	PS378-R_19115	PS57-R_17905	RL316_08435	RL320_08940	RL97_11425	SA17021_26370	SA17022_13640	SA17023_22760	SA17024_13345	SA17101_09725	SB17032_00430	SB17033_20220	SB17034_22385	SB17035_25715	SB17036_16630	SB17037_23020	SB17038_15315	SB17039_14510	SB17040_12180	SB17042_17270
trmL		tRNA (uridine(34)/cytosine(34)/5-carboxymethylaminomethyluridine(34)-2'-O)-methyltransferase TrmL	46	46	1	99	7216				473	473	473	2E151-R_07695	HBI01_10115	HBI05_16700	HBI04_20415	HBI02_12145	HBI03_21015	PS148-R_06155	PS15001_05465	PS15002_06480	PS16001_00950	PS16002_00755	PS16003_04005	PS16004_05280	PS16005_00480	PS184-R_09200	PS310-R_09505	PS378-R_08700	PS57-R_06020	RL316_02910	RL320_09585	RL97_14585	SA17021_14995	SA17022_00365	SA17023_15255	SA17024_04510	SA17101_08530	SB17032_18700	SB17033_01590	SB17034_02335	SB17035_05945	SB17036_00660	SB17037_21100	SB17038_21685	SB17039_02020	SB17040_04875	SB17042_19490
sdhE		FAD assembly factor SdhE	46	46	1	99	7440				266	266	266	2E151-R_15770	HBI01_15945	HBI05_10725	HBI04_21565	HBI02_23115	HBI03_22495	PS148-R_15490	PS15001_00390	PS15002_14330	PS16001_23995	PS16002_03860	PS16003_08465	PS16004_07320	PS16005_09560	PS184-R_15090	PS310-R_16885	PS378-R_15040	PS57-R_14685	RL316_19140	RL320_20595	RL97_05430	SA17021_20530	SA17022_12405	SA17023_03925	SA17024_24255	SA17101_07345	SB17032_00855	SB17033_14345	SB17034_16000	SB17035_18640	SB17036_05360	SB17037_12775	SB17038_10140	SB17039_05675	SB17040_10435	SB17042_12320
glnE		bifunctional [glutamate--ammonia ligase]-adenylyl-L-tyrosine phosphorylase/[glutamate--ammonia-ligase] adenylyltransferase	46	46	1	99	9217				2840	2840	2840	2E151-R_00975	HBI01_06595	HBI05_22535	HBI04_24180	HBI02_10760	HBI03_15855	PS148-R_01065	PS15001_06425	PS15002_21460	PS16001_09535	PS16002_25365	PS16003_01585	PS16004_03270	PS16005_08090	PS184-R_03800	PS310-R_04010	PS378-R_01065	PS57-R_01065	RL316_25815	RL320_24590	RL97_16680	SA17021_10115	SA17022_05460	SA17023_05770	SA17024_08820	SA17101_10640	SB17032_05265	SB17033_23810	SB17034_06800	SB17035_23700	SB17036_09080	SB17037_01215	SB17038_02380	SB17039_12645	SB17040_09900	SB17042_06140
eutN		ethanolamine utilization microcompartment protein EutN	46	46	1	99	425				287	287	287	2E151-R_14410	HBI01_25510	HBI05_12060	HBI04_16855	HBI02_08305	HBI03_23740	PS148-R_14995	PS15001_13715	PS15002_08485	PS16001_04065	PS16002_07115	PS16003_07390	PS16004_01280	PS16005_10190	PS184-R_14840	PS310-R_11525	PS378-R_10725	PS57-R_13570	RL316_10090	RL320_26465	RL97_13305	SA17021_04015	SA17022_03405	SA17023_21895	SA17024_17590	SA17101_05150	SB17032_15030	SB17033_08210	SB17034_12035	SB17035_20560	SB17036_14595	SB17037_05545	SB17038_06905	SB17039_08730	SB17040_01055	SB17042_00760
yhhL		DUF1145 domain-containing protein	46	46	1	99	6993				269	269	269	2E151-R_13775	HBI01_04015	HBI05_18355	HBI04_22435	HBI02_06965	HBI03_11655	PS148-R_13785	PS15001_02810	PS15002_23155	PS16001_14315	PS16002_18380	PS16003_12835	PS16004_18850	PS16005_05940	PS184-R_13340	PS310-R_15030	PS378-R_14245	PS57-R_12935	RL316_20155	RL320_14020	RL97_00630	SA17021_15800	SA17022_16775	SA17023_08315	SA17024_05230	SA17101_26480	SB17032_03405	SB17033_11480	SB17034_25730	SB17035_02860	SB17036_23445	SB17037_24905	SB17038_18170	SB17039_13925	SB17040_25125	SB17042_04410
yfhb		phosphatidylglycerophosphatase C	46	46	1	99	263				635	635	635	2E151-R_15140	HBI01_20290	HBI05_06505	HBI04_23865	HBI02_15925	HBI03_01255	PS148-R_14265	PS15001_13230	PS15002_08970	PS16001_04550	PS16002_08040	PS16003_07875	PS16004_06750	PS16005_02890	PS184-R_14110	PS310-R_12255	PS378-R_11455	PS57-R_14300	RL316_09605	RL320_25980	RL97_10905	SA17021_03530	SA17022_03890	SA17023_20440	SA17024_02490	SA17101_05740	SB17032_15615	SB17033_07725	SB17034_11550	SB17035_20075	SB17036_04805	SB17037_15675	SB17038_07390	SB17039_09215	SB17040_00570	SB17042_00170
pldA		phospholipase A	46	46	1	99	4448				869	869	869	2E151-R_18285	HBI01_20905	HBI05_20375	HBI04_09400	HBI02_19930	HBI03_13825	PS148-R_18650	PS15001_24035	PS15002_16985	PS16001_15740	PS16002_24445	PS16003_02720	PS16004_22255	PS16005_00750	PS184-R_18495	PS310-R_20110	PS378-R_18930	PS57-R_18090	RL316_11115	RL320_01135	RL97_00065	SA17021_23590	SA17022_13450	SA17023_22560	SA17024_13535	SA17101_09645	SB17032_00510	SB17033_25190	SB17034_22195	SB17035_25905	SB17036_16820	SB17037_23210	SB17038_15505	SB17039_14700	SB17040_12365	SB17042_17350
sohB		protease SohB	46	46	1	99	6136				1049	1049	1049	2E151-R_16895	HBI01_15255	HBI05_17115	HBI04_00645	HBI02_02690	HBI03_15080	PS148-R_16615	PS15001_04420	PS15002_18630	PS16001_25350	PS16002_16200	PS16003_23900	PS16004_02305	PS16005_04915	PS184-R_16460	PS310-R_18900	PS378-R_16395	PS57-R_16055	RL316_13245	RL320_19155	RL97_21390	SA17021_25145	SA17022_18080	SA17023_25155	SA17024_00455	SA17101_19325	SB17032_11975	SB17033_22400	SB17034_13255	SB17035_16840	SB17036_17965	SB17037_18640	SB17038_24325	SB17039_24885	SB17040_03605	SB17042_12185
matP		macrodomain Ter protein MatP	46	46	1	99	788				452	452	452	2E151-R_03055	HBI01_01700	HBI05_14230	HBI04_25010	HBI02_15285	HBI03_21400	PS148-R_04815	PS15001_22830	PS15002_02030	PS16001_18265	PS16002_10505	PS16003_15265	PS16004_14425	PS16005_19025	PS184-R_05780	PS310-R_06085	PS378-R_04675	PS57-R_02895	RL316_16480	RL320_14505	RL97_06240	SA17021_00515	SA17022_09180	SA17023_01590	SA17024_16415	SA17101_02245	SB17032_21675	SB17033_03210	SB17034_19770	SB17035_04605	SB17036_10480	SB17037_03290	SB17038_13010	SB17039_23060	SB17040_19410	SB17042_15335
srlD		sorbitol-6-phosphate dehydrogenase	46	46	1	99	8048				779	779	779	2E151-R_16055	HBI01_08700	HBI05_15405	HBI04_21080	HBI02_17575	HBI03_10695	PS148-R_16340	PS15001_10355	PS15002_17960	PS16001_17290	PS16002_15145	PS16003_24505	PS16004_18510	PS16005_11725	PS184-R_16180	PS310-R_17835	PS378-R_15325	PS57-R_15780	RL316_18025	RL320_05555	RL97_11635	SA17021_10895	SA17022_15000	SA17023_14630	SA17024_06025	SA17101_06255	SB17032_01955	SB17033_13230	SB17034_14075	SB17035_22840	SB17036_13145	SB17037_14135	SB17038_14665	SB17039_20755	SB17040_16485	SB17042_16920
lolB		lipoprotein insertase outer membrane protein LolB	46	46	1	99	6063				623	623	623	2E151-R_19010	HBI01_08390	HBI05_25155	HBI04_25460	HBI02_07350	HBI03_17925	PS148-R_18255	PS15001_04780	PS15002_18990	PS16001_25710	PS16002_08605	PS16003_16855	PS16004_00030	PS16005_04555	PS184-R_18100	PS310-R_15490	PS378-R_18105	PS57-R_17700	RL316_13605	RL320_25550	RL97_21750	SA17021_24785	SA17022_18440	SA17023_02715	SA17024_20600	SA17101_19650	SB17032_12455	SB17033_07260	SB17034_10990	SB17035_16480	SB17036_09670	SB17037_19000	SB17038_00440	SB17039_25245	SB17040_03965	SB17042_10310
argE		acetylornithine deacetylase	46	46	1	99	931				1151	1151	1151	2E151-R_20140	HBI01_25795	HBI05_18805	HBI04_07760	HBI02_13530	HBI03_05240	PS148-R_20590	PS15001_15990	PS15002_00575	PS16001_10990	PS16002_05200	PS16003_00385	PS16004_06560	PS16005_04110	PS184-R_20240	PS310-R_17180	PS378-R_20605	PS57-R_19785	RL316_04030	RL320_16110	RL97_12545	SA17021_16685	SA17022_11410	SA17023_07655	SA17024_12865	SA17101_22280	SB17032_09095	SB17033_06365	SB17034_23970	SB17035_09505	SB17036_07485	SB17037_09555	SB17038_04215	SB17039_00605	SB17040_09030	SB17042_20240
sufC		Fe-S cluster assembly ATPase SufC	46	46	1	99	2991				746	746	746	2E151-R_06505	HBI01_00240	HBI05_23295	HBI04_19600	HBI02_22570	HBI03_18170	PS148-R_10865	PS15001_25510	PS15002_07805	PS16001_22285	PS16002_21830	PS16003_25645	PS16004_10135	PS16005_13035	PS184-R_00280	PS310-R_02445	PS378-R_17570	PS57-R_08575	RL316_22360	RL320_17370	RL97_26025	SA17021_07345	SA17022_20080	SA17023_18360	SA17024_11035	SA17101_21610	SB17032_20695	SB17033_17195	SB17034_05805	SB17035_12475	SB17036_19425	SB17037_08245	SB17038_08295	SB17039_15845	SB17040_15140	SB17042_11055
csgF		curli production assembly/transport protein CsgF	46	46	1	99	696				416	416	416	2E151-R_03410	HBI01_02055	HBI05_14565	HBI04_22970	HBI02_23760	HBI03_08495	PS148-R_05170	PS15001_22475	PS15002_01675	PS16001_17910	PS16002_10150	PS16003_12470	PS16004_19830	PS16005_18670	PS184-R_06135	PS310-R_06440	PS378-R_04320	PS57-R_02540	RL316_24535	RL320_23260	RL97_06595	SA17021_00075	SA17022_08825	SA17023_01945	SA17024_16770	SA17101_02605	SB17032_04215	SB17033_02855	SB17034_19415	SB17035_04960	SB17036_10125	SB17037_02935	SB17038_12655	SB17039_23415	SB17040_19055	SB17042_09525
pdxK		pyridoxine/pyridoxal/pyridoxamine kinase	46	46	1	99	453				851	851	851	2E151-R_24010	HBI01_25650	HBI05_01195	HBI04_16720	HBI02_08460	HBI03_23605	PS148-R_23720	PS15001_13855	PS15002_08345	PS16001_03925	PS16002_06585	PS16003_07250	PS16004_01140	PS16005_10330	PS184-R_24340	PS310-R_11390	PS378-R_10590	PS57-R_23485	RL316_10230	RL320_26605	RL97_13165	SA17021_04155	SA17022_03265	SA17023_10460	SA17024_18440	SA17101_05010	SB17032_14885	SB17033_21630	SB17034_12175	SB17035_20700	SB17036_14735	SB17037_05685	SB17038_06765	SB17039_09515	SB17040_01195	SB17042_00900
uacR		Putative uric acid sigma-54-dependent transcriptional regulator UacR	46	46	1	99	7411				1778	1778	1778	2E151-R_15630	HBI01_15800	HBI05_10870	HBI04_21495	HBI02_23255	HBI03_08925	PS148-R_15350	PS15001_00245	PS15002_14185	PS16001_24135	PS16002_03720	PS16003_08325	PS16004_07180	PS16005_09705	PS184-R_15230	PS310-R_16745	PS378-R_14900	PS57-R_14825	RL316_18995	RL320_20740	RL97_05285	SA17021_20385	SA17022_12550	SA17023_03780	SA17024_24395	SA17101_07200	SB17032_01000	SB17033_14200	SB17034_15855	SB17035_18785	SB17036_05505	SB17037_12630	SB17038_10285	SB17039_05820	SB17040_10575	SB17042_12460
pdeN		cyclic di-GMP phosphodiesterase	46	46	1	99	64				1556	1556	1556	2E151-R_04450	HBI01_18210	HBI05_10030	HBI04_17280	HBI02_06305	HBI03_11070	PS148-R_02730	PS15001_15020	PS15002_03775	PS16001_02760	PS16002_15390	PS16003_06080	PS16004_02765	PS16005_14715	PS184-R_07720	PS310-R_07480	PS378-R_02730	PS57-R_05000	RL316_15270	RL320_12830	RL97_05700	SA17021_13055	SA17022_02100	SA17023_09290	SA17024_20150	SA17101_03840	SB17032_24165	SB17033_18765	SB17034_14265	SB17035_21870	SB17036_03110	SB17037_06855	SB17038_05600	SB17039_03265	SB17040_02360	SB17042_08065
ddlB		D-alanine--D-alanine ligase	46	46	1	99	8880				920	920	920	2E151-R_10830	HBI01_16455	HBI05_11185	HBI04_20200	HBI02_07710	HBI03_14300	PS148-R_07820	PS15001_12475	PS15002_25370	PS16001_12835	PS16002_23465	PS16003_11495	PS16004_23515	PS16005_24405	PS184-R_10400	PS310-R_10700	PS378-R_09795	PS57-R_07580	RL316_06340	RL320_04405	RL97_18655	SA17021_21460	SA17022_25915	SA17023_23265	SA17024_21520	SA17101_12975	SB17032_27585	SB17033_00615	SB17034_00295	SB17035_14000	SB17036_11420	SB17037_01070	SB17038_17210	SB17039_19580	SB17040_23250	SB17042_02530
srlA		PTS glucitol/sorbitol transporter subunit IIC	46	46	1	99	8045				563	563	563	2E151-R_16040	HBI01_08685	HBI05_15390	HBI04_21065	HBI02_17560	HBI03_10680	PS148-R_16355	PS15001_10370	PS15002_17945	PS16001_17275	PS16002_15160	PS16003_24490	PS16004_18530	PS16005_11740	PS184-R_16195	PS310-R_17820	PS378-R_15310	PS57-R_15795	RL316_18010	RL320_05570	RL97_11650	SA17021_10910	SA17022_14985	SA17023_14615	SA17024_06040	SA17101_06240	SB17032_01970	SB17033_13215	SB17034_14060	SB17035_22855	SB17036_13160	SB17037_14120	SB17038_14650	SB17039_20770	SB17040_16500	SB17042_16905
yecJ		Uncharacterized protein YecJ	46	46	1	99	9586				251	251	251	2E151-R_09725	HBI01_01165	HBI05_08505	HBI04_07320	HBI02_19825	HBI03_10305	PS148-R_09495	PS15001_03575	PS15002_16255	PS16001_07370	PS16002_20450	PS16003_20975	PS16004_16330	PS16005_20915	PS184-R_01660	PS310-R_01065	PS378-R_06765	PS57-R_12220	RL316_12080	RL320_10215	RL97_17825	SA17021_08745	SA17022_21460	SA17023_19740	SA17024_12415	SA17101_00155	SB17032_23910	SB17033_17835	SB17034_04720	SB17035_03985	SB17036_22970	SB17037_02275	SB17038_19460	SB17039_17225	SB17040_13745	SB17042_13715
yjiX		Uncharacterized protein YjiX	46	46	1	99	8604				203	203	203	2E151-R_13360	HBI01_11805	HBI05_24195	HBI04_16310	HBI02_05895	HBI03_16490	PS148-R_12235	PS15001_07930	PS15002_24325	PS16001_19730	PS16002_19405	PS16003_21950	PS16004_11900	PS16005_16390	PS184-R_12925	PS310-R_13490	PS378-R_13540	PS57-R_11470	RL316_05385	RL320_16390	RL97_01635	SA17021_24240	SA17022_24800	SA17023_16665	SA17024_22625	SA17101_25020	SB17032_28380	SB17033_03810	SB17034_03065	SB17035_01650	SB17036_12535	SB17037_13215	SB17038_16090	SB17039_18470	SB17040_22135	SB17042_03325
flgN		flagella biosynthesis chaperone FlgN	46	46	1	99	661				416	416	416	2E151-R_03575	HBI01_23690	HBI05_14730	HBI04_12285	HBI02_00395	HBI03_02445	PS148-R_05335	PS15001_22310	PS15002_01510	PS16001_11805	PS16002_09985	PS16003_12305	PS16004_19665	PS16005_21235	PS184-R_06300	PS310-R_06605	PS378-R_04155	PS57-R_02375	RL316_24370	RL320_23095	RL97_06760	SA17021_14040	SA17022_08660	SA17023_02110	SA17024_16935	SA17101_02770	SB17032_04380	SB17033_02690	SB17034_19250	SB17035_05125	SB17036_17490	SB17037_02770	SB17038_12490	SB17039_23580	SB17040_18890	SB17042_09690
potB		spermidine/putrescine ABC transporter permease PotB	46	46	1	99	3685				857	863	858	2E151-R_03850	HBI01_23415	HBI05_15015	HBI04_20905	HBI02_24900	HBI03_22940	PS148-R_05610	PS15001_22035	PS15002_01235	PS16001_12080	PS16002_09710	PS16003_15820	PS16004_17595	PS16005_21510	PS184-R_06575	PS310-R_06880	PS378-R_03880	PS57-R_02100	RL316_24095	RL320_22820	RL97_07035	SA17021_13765	SA17022_08385	SA17023_02385	SA17024_17215	SA17101_03050	SB17032_04645	SB17033_12370	SB17034_18975	SB17035_05400	SB17036_17765	SB17037_10055	SB17038_12215	SB17039_03995	SB17040_11695	SB17042_09955
priA		primosomal protein N'	46	46	1	99	961				2198	2198	2198	2E151-R_20255	HBI01_25910	HBI05_18690	HBI04_19175	HBI02_13645	HBI03_05355	PS148-R_20475	PS15001_16105	PS15002_00690	PS16001_11105	PS16002_05315	PS16003_00500	PS16004_06445	PS16005_03995	PS184-R_20355	PS310-R_17295	PS378-R_20720	PS57-R_19900	RL316_03915	RL320_15995	RL97_12430	SA17021_16800	SA17022_11525	SA17023_07540	SA17024_14920	SA17101_08860	SB17032_08980	SB17033_06250	SB17034_24085	SB17035_09620	SB17036_07370	SB17037_09440	SB17038_04330	SB17039_00490	SB17040_08915	SB17042_20125
yddM		HigA family addiction module antitoxin	46	46	1	99	3240				284	284	284	2E151-R_25085	HBI01_12605	HBI05_06920	HBI04_12995	HBI02_26460	HBI03_20715	PS148-R_24995	PS15001_19200	PS15002_19735	PS16001_20980	PS16002_12830	PS16003_16535	PS16004_16995	PS16005_22670	PS184-R_25230	PS310-R_25055	PS378-R_25200	PS57-R_25050	RL316_04150	RL320_10695	RL97_12150	SA17021_22150	SA17022_19305	SA17023_26270	SA17024_18660	SA17101_25440	SB17032_25530	SB17033_21825	SB17034_05305	SB17035_10160	SB17036_18340	SB17037_17370	SB17038_15155	SB17039_08670	SB17040_18210	SB17042_22425
elyC		envelope biogenesis factor ElyC	46	46	1	99	828				779	779	779	2E151-R_02910	HBI01_01555	HBI05_04915	HBI04_00155	HBI02_18930	HBI03_21255	PS148-R_04670	PS15001_22975	PS15002_02175	PS16001_05250	PS16002_10650	PS16003_15120	PS16004_14570	PS16005_02160	PS184-R_05635	PS310-R_05940	PS378-R_04820	PS57-R_03040	RL316_16625	RL320_14650	RL97_06095	SA17021_00660	SA17022_09325	SA17023_16340	SA17024_16270	SA17101_02055	SB17032_21485	SB17033_03355	SB17034_19915	SB17035_04460	SB17036_10625	SB17037_03435	SB17038_13155	SB17039_22915	SB17040_19555	SB17042_15530
moaE		molybdopterin synthase catalytic subunit MoaE	46	46	1	99	9933				452	452	452	2E151-R_02230	HBI01_12815	HBI05_07580	HBI04_26400	HBI02_24065	HBI03_24340	PS148-R_03990	PS15001_23655	PS15002_02855	PS16001_05930	PS16002_11330	PS16003_14440	PS16004_19210	PS16005_17510	PS184-R_04955	PS310-R_05260	PS378-R_05500	PS57-R_03720	RL316_17305	RL320_15330	RL97_08860	SA17021_01340	SA17022_10005	SA17023_00065	SA17024_01055	SA17101_20520	SB17032_06415	SB17033_04910	SB17034_20595	SB17035_06835	SB17036_04090	SB17037_04115	SB17038_02875	SB17039_22235	SB17040_20235	SB17042_07575
gabP		GABA permease	46	46	1	99	8007				1400	1400	1400	2E151-R_21810	HBI01_02855	HBI05_00045	HBI04_15895	HBI02_11630	HBI03_07095	PS148-R_21750	PS15001_10575	PS15002_17740	PS16001_26370	PS16002_07580	PS16003_24285	PS16004_10855	PS16005_03075	PS184-R_21900	PS310-R_22535	PS378-R_22275	PS57-R_21860	RL316_17800	RL320_05780	RL97_16580	SA17021_11115	SA17022_14770	SA17023_14405	SA17024_06250	SA17101_06045	SB17032_02170	SB17033_13005	SB17034_17745	SB17035_11575	SB17036_13375	SB17037_13905	SB17038_14435	SB17039_20985	SB17040_16715	SB17042_16705
gntK		gluconokinase	46	46	1	99	6959				527	527	527	2E151-R_13910	HBI01_03880	HBI05_17990	HBI04_18825	HBI02_20590	HBI03_14630	PS148-R_13650	PS15001_02945	PS15002_23020	PS16001_14180	PS16002_18515	PS16003_12970	PS16004_18985	PS16005_06075	PS184-R_13475	PS310-R_14895	PS378-R_14110	PS57-R_13070	RL316_20020	RL320_13885	RL97_00495	SA17021_15935	SA17022_16640	SA17023_08180	SA17024_05365	SA17101_26635	SB17032_03545	SB17033_11345	SB17034_25865	SB17035_02995	SB17036_23580	SB17037_25040	SB17038_18305	SB17039_13790	SB17040_25260	SB17042_04550
murP		PTS N-acetylmuramic acid transporter subunit IIBC	46	46	1	99	443				1424	1424	1424	2E151-R_24055	HBI01_25605	HBI05_01245	HBI04_16765	HBI02_08410	HBI03_23650	PS148-R_23675	PS15001_13810	PS15002_08390	PS16001_03970	PS16002_06630	PS16003_07295	PS16004_01185	PS16005_10285	PS184-R_24295	PS310-R_11435	PS378-R_10635	PS57-R_23530	RL316_10185	RL320_26560	RL97_13210	SA17021_04110	SA17022_03310	SA17023_10505	SA17024_18485	SA17101_05060	SB17032_14935	SB17033_21585	SB17034_12130	SB17035_20655	SB17036_14690	SB17037_05640	SB17038_06810	SB17039_09470	SB17040_01150	SB17042_00850
ydjY		Uncharacterized protein YdjY	46	46	1	99	9403				677	677	677	2E151-R_05900	HBI01_19525	HBI05_23705	HBI04_12760	HBI02_21760	HBI03_00505	PS148-R_10260	PS15001_24905	PS15002_07200	PS16001_21680	PS16002_21225	PS16003_25040	PS16004_25980	PS16005_19770	PS184-R_00885	PS310-R_01840	PS378-R_07540	PS57-R_09180	RL316_21755	RL320_00410	RL97_03840	SA17021_07970	SA17022_20685	SA17023_18970	SA17024_11640	SA17101_21975	SB17032_20330	SB17033_25550	SB17034_03945	SB17035_08630	SB17036_19010	SB17037_07620	SB17038_20235	SB17039_16450	SB17040_14520	SB17042_10690
opgE		phosphoethanolamine transferase	46	46	1	99	9971				1583	1583	1583	2E151-R_02390	HBI01_12975	HBI05_07410	HBI04_26240	HBI02_23890	HBI03_03375	PS148-R_04150	PS15001_23495	PS15002_02695	PS16001_05770	PS16002_11170	PS16003_14600	PS16004_15090	PS16005_19450	PS184-R_05115	PS310-R_05420	PS378-R_05340	PS57-R_03560	RL316_17145	RL320_15170	RL97_09020	SA17021_01180	SA17022_09845	SA17023_00225	SA17024_00895	SA17101_20695	SB17032_06590	SB17033_04750	SB17034_20435	SB17035_06675	SB17036_04250	SB17037_03955	SB17038_02715	SB17039_22395	SB17040_20075	SB17042_07750
ycfL		Uncharacterized conserved protein YcfL	46	46	1	99	627				353	377	358	2E151-R_03745	HBI01_23520	HBI05_14910	HBI04_12115	HBI02_18000	HBI03_02275	PS148-R_05505	PS15001_22140	PS15002_01340	PS16001_11975	PS16002_09815	PS16003_15925	PS16004_19495	PS16005_21405	PS184-R_06470	PS310-R_06775	PS378-R_03985	PS57-R_02205	RL316_24200	RL320_22925	RL97_06930	SA17021_13870	SA17022_08490	SA17023_02280	SA17024_17110	SA17101_02940	SB17032_04550	SB17033_12265	SB17034_19080	SB17035_05295	SB17036_17660	SB17037_02600	SB17038_12320	SB17039_04100	SB17040_18720	SB17042_09860
nfsB		oxygen-insensitive NAD(P)H nitroreductase	46	46	1	99	3734				653	653	653	2E151-R_17600	HBI01_21455	HBI05_16650	HBI04_06945	HBI02_15845	HBI03_07630	PS148-R_17490	PS15001_09055	PS15002_10610	PS16001_16340	PS16002_06060	PS16003_13675	PS16004_15755	PS16005_15145	PS184-R_17335	PS310-R_19370	PS378-R_16865	PS57-R_16760	RL316_07495	RL320_21785	RL97_20235	SA17021_02470	SA17022_07495	SA17023_03500	SA17024_02075	SA17101_23105	SB17032_18070	SB17033_05930	SB17034_21615	SB17035_07860	SB17036_01915	SB17037_11440	SB17038_03895	SB17039_10170	SB17040_21245	SB17042_24375
speC		ornithine decarboxylase	46	46	1	99	7525				2135	2135	2135	2E151-R_24575	HBI01_07860	HBI05_24665	HBI04_03335	HBI02_20935	HBI03_02945	PS148-R_24315	PS15001_00750	PS15002_14690	PS16001_23635	PS16002_04220	PS16003_08830	PS16004_07680	PS16005_09200	PS184-R_24765	PS310-R_24545	PS378-R_24690	PS57-R_24440	RL316_19500	RL320_20235	RL97_24635	SA17021_12240	SA17022_12045	SA17023_04285	SA17024_23895	SA17101_15870	SB17032_10235	SB17033_14705	SB17034_16360	SB17035_18280	SB17036_05000	SB17037_13135	SB17038_09780	SB17039_04520	SB17040_10075	SB17042_23140
ibeC		phosphoethanolamine transferase CptA	46	46	1	99	933				1733	1733	1733	2E151-R_20150	HBI01_25805	HBI05_18795	HBI04_07750	HBI02_13540	HBI03_05250	PS148-R_20580	PS15001_16000	PS15002_00585	PS16001_11000	PS16002_05210	PS16003_00395	PS16004_06550	PS16005_04100	PS184-R_20250	PS310-R_17190	PS378-R_20615	PS57-R_19795	RL316_04020	RL320_16100	RL97_12535	SA17021_16695	SA17022_11420	SA17023_07645	SA17024_12875	SA17101_22290	SB17032_09085	SB17033_06355	SB17034_23980	SB17035_09515	SB17036_07475	SB17037_09545	SB17038_04225	SB17039_00595	SB17040_09020	SB17042_20230
ynjE		thiosulfate sulfurtransferase YnjE	46	46	1	99	9410				1307	1307	1307	2E151-R_05870	HBI01_19555	HBI05_23735	HBI04_12790	HBI02_21790	HBI03_00535	PS148-R_10230	PS15001_24875	PS15002_07170	PS16001_21650	PS16002_21195	PS16003_25010	PS16004_25950	PS16005_19740	PS184-R_00915	PS310-R_01810	PS378-R_07510	PS57-R_09210	RL316_21725	RL320_00380	RL97_03810	SA17021_08000	SA17022_20715	SA17023_19000	SA17024_11670	SA17101_22005	SB17032_20300	SB17033_25580	SB17034_03975	SB17035_08660	SB17036_19040	SB17037_07590	SB17038_20205	SB17039_16480	SB17040_14490	SB17042_10660
yiaY		L-threonine dehydrogenase	46	46	1	99	7177				1151	1151	1151	2E151-R_07615	HBI01_06530	HBI05_16300	HBI04_13675	HBI02_16340	HBI03_19645	PS148-R_06075	PS15001_05385	PS15002_06560	PS16001_01030	PS16002_00675	PS16003_04085	PS16004_05360	PS16005_00400	PS184-R_09280	PS310-R_09585	PS378-R_08780	PS57-R_05940	RL316_02830	RL320_09665	RL97_24080	SA17021_15075	SA17022_00285	SA17023_15175	SA17024_04590	SA17101_13795	SB17032_18820	SB17033_01510	SB17034_02415	SB17035_05865	SB17036_00580	SB17037_21020	SB17038_21765	SB17039_02100	SB17040_04795	SB17042_03545
ulaE		L-ribulose-5-phosphate 3-epimerase UlaE	46	46	1	99	4193				854	854	854	2E151-R_12585	HBI01_02495	HBI05_21870	HBI04_23565	HBI02_05485	HBI03_07865	PS148-R_13010	PS15001_17645	PS15002_05625	PS16001_20500	PS16002_04655	PS16003_22720	PS16004_09085	PS16005_15550	PS184-R_12155	PS310-R_14260	PS378-R_12760	PS57-R_10700	RL316_08910	RL320_02290	RL97_15525	SA17021_06105	SA17022_10955	SA17023_13865	SA17024_23400	SA17101_24020	SB17032_08265	SB17033_10785	SB17034_08150	SB17035_00415	SB17036_24540	SB17037_04590	SB17038_13805	SB17039_07065	SB17040_07085	SB17042_13895
dacB		serine-type D-Ala-D-Ala carboxypeptidase	46	46	1	99	9078				1433	1433	1433	2E151-R_01590	HBI01_07210	HBI05_13500	HBI04_01870	HBI02_24505	HBI03_18995	PS148-R_00450	PS15001_07040	PS15002_22075	PS16001_10150	PS16002_25980	PS16003_02200	PS16004_03885	PS16005_08705	PS184-R_03185	PS310-R_04625	PS378-R_00450	PS57-R_00450	RL316_26430	RL320_23975	RL97_17300	SA17021_09500	SA17022_06075	SA17023_06385	SA17024_09435	SA17101_11315	SB17032_16745	SB17033_23195	SB17034_09890	SB17035_24320	SB17036_16370	SB17037_16620	SB17038_01765	SB17039_04915	SB17040_07950	SB17042_05465
yieF		class I chromate reductase YieF	46	46	1	99	4705				566	566	566	2E151-R_08420	HBI01_09810	HBI05_09010	HBI04_02350	HBI02_15560	HBI03_14810	PS148-R_06880	PS15001_11270	PS15002_15370	PS16001_00225	PS16002_01480	PS16003_03280	PS16004_08085	PS16005_01690	PS184-R_08475	PS310-R_08780	PS378-R_07975	PS57-R_06745	RL316_01640	RL320_07465	RL97_07870	SA17021_14270	SA17022_01090	SA17023_04955	SA17024_03785	SA17101_01060	SB17032_10460	SB17033_02315	SB17034_13485	SB17035_10435	SB17036_01385	SB17037_21825	SB17038_11395	SB17039_01295	SB17040_05600	SB17042_15845
ttdT		L-tartrate/succinate antiporter	46	46	1	99	9207				1463	1463	1463	2E151-R_01025	HBI01_06645	HBI05_22590	HBI04_24235	HBI02_10810	HBI03_15805	PS148-R_01015	PS15001_06475	PS15002_21510	PS16001_09585	PS16002_25415	PS16003_01635	PS16004_03320	PS16005_08140	PS184-R_03750	PS310-R_04060	PS378-R_01015	PS57-R_01015	RL316_25865	RL320_24540	RL97_16730	SA17021_10065	SA17022_05510	SA17023_05820	SA17024_08870	SA17101_10690	SB17032_05320	SB17033_23760	SB17034_06750	SB17035_23750	SB17036_09130	SB17037_16055	SB17038_02330	SB17039_12595	SB17040_09950	SB17042_06085
rbbA		ribosome-associated ATPase/putative transporter RbbA	46	46	1	99	7026				2735	2735	2735	2E151-R_13650	HBI01_04140	HBI05_18140	HBI04_22305	HBI02_06750	HBI03_11530	PS148-R_13910	PS15001_02685	PS15002_23280	PS16001_14440	PS16002_18255	PS16003_12710	PS16004_18725	PS16005_05815	PS184-R_13215	PS310-R_15155	PS378-R_14370	PS57-R_12810	RL316_20280	RL320_14145	RL97_00755	SA17021_15675	SA17022_16900	SA17023_08440	SA17024_05105	SA17101_26390	SB17032_19475	SB17033_11605	SB17034_25605	SB17035_02735	SB17036_23320	SB17037_24780	SB17038_18045	SB17039_12160	SB17040_25000	SB17042_04190
ppiB		peptidylprolyl isomerase B	46	46	1	99	2097				494	494	494	2E151-R_25990	HBI01_12305	HBI05_12250	HBI04_21880	HBI02_13300	HBI03_03480	PS148-R_25940	PS15001_18245	PS15002_14910	PS16001_15870	PS16002_06890	PS16003_15590	PS16004_16650	PS16005_22095	PS184-R_24055	PS310-R_25985	PS378-R_26005	PS57-R_25910	RL316_21015	RL320_01635	RL97_19475	SA17021_23260	SA17022_23850	SA17023_20205	SA17024_19000	SA17101_09920	SB17032_26235	SB17033_12460	SB17034_13840	SB17035_14860	SB17036_18540	SB17037_25695	SB17038_25055	SB17039_25630	SB17040_25805	SB17042_18335
rlpA		endolytic peptidoglycan transglycosylase RlpA	46	46	1	99	1539				1088	1088	1088	2E151-R_17880	HBI01_23025	HBI05_02155	HBI04_14315	HBI02_14245	HBI03_16420	PS148-R_17210	PS15001_08775	PS15002_10330	PS16001_16060	PS16002_17180	PS16003_08915	PS16004_15455	PS16005_17650	PS184-R_17055	PS310-R_19650	PS378-R_17145	PS57-R_17040	RL316_07775	RL320_22065	RL97_10120	SA17021_02190	SA17022_07215	SA17023_13200	SA17024_01795	SA17101_23415	SB17032_17775	SB17033_05650	SB17034_21335	SB17035_07575	SB17036_02195	SB17037_12155	SB17038_03615	SB17039_10625	SB17040_20965	SB17042_06810
gppA		guanosine-5'-triphosphate,3'-diphosphate diphosphatase	46	46	1	99	4409				1484	1484	1484	2E151-R_18495	HBI01_21115	HBI05_00340	HBI04_16225	HBI02_23405	HBI03_15265	PS148-R_18860	PS15001_23825	PS15002_16775	PS16001_15530	PS16002_24655	PS16003_02930	PS16004_22465	PS16005_00960	PS184-R_18705	PS310-R_19900	PS378-R_18720	PS57-R_18300	RL316_10905	RL320_00925	RL97_12790	SA17021_23380	SA17022_13240	SA17023_22350	SA17024_13745	SA17101_09405	SB17032_00755	SB17033_24980	SB17034_21985	SB17035_26115	SB17036_17030	SB17037_23420	SB17038_15710	SB17039_14910	SB17040_12575	SB17042_17590
murE		UDP-N-acetylmuramoyl-L-alanyl-D-glutamate--2,6-diaminopimelate ligase	46	46	1	99	8887				1487	1487	1487	2E151-R_10795	HBI01_16490	HBI05_11220	HBI04_20235	HBI02_07745	HBI03_14335	PS148-R_07785	PS15001_12510	PS15002_25335	PS16001_12870	PS16002_23500	PS16003_11460	PS16004_23550	PS16005_24370	PS184-R_10365	PS310-R_10665	PS378-R_09830	PS57-R_07615	RL316_06305	RL320_04370	RL97_18620	SA17021_21425	SA17022_25880	SA17023_23300	SA17024_21555	SA17101_12940	SB17032_27620	SB17033_00650	SB17034_00260	SB17035_13965	SB17036_11455	SB17037_01035	SB17038_17175	SB17039_19545	SB17040_23215	SB17042_02565
pncC		nicotinamide-nucleotide amidase	46	46	1	99	8043				497	497	497	2E151-R_16030	HBI01_08675	HBI05_15380	HBI04_21055	HBI02_17550	HBI03_11320	PS148-R_16365	PS15001_10380	PS15002_17935	PS16001_26565	PS16002_15170	PS16003_24480	PS16004_18540	PS16005_11750	PS184-R_16205	PS310-R_17810	PS378-R_15300	PS57-R_15805	RL316_18000	RL320_05580	RL97_11660	SA17021_10920	SA17022_14975	SA17023_14605	SA17024_06050	SA17101_06230	SB17032_01980	SB17033_13205	SB17034_14050	SB17035_22865	SB17036_13170	SB17037_14110	SB17038_14640	SB17039_20780	SB17040_16510	SB17042_16895
dtpD		dipeptide permease DtpD	46	46	1	99	9832				1481	1481	1481	2E151-R_19905	HBI01_20020	HBI05_19240	HBI04_06130	HBI02_11395	HBI03_16725	PS148-R_20130	PS15001_08415	PS15002_09970	PS16001_16935	PS16002_09465	PS16003_09275	PS16004_21040	PS16005_11135	PS184-R_19990	PS310-R_21565	PS378-R_20370	PS57-R_19550	RL316_08135	RL320_22425	RL97_02325	SA17021_01830	SA17022_06580	SA17023_12840	SA17024_01435	SA17101_20135	SB17032_17455	SB17033_05290	SB17034_20975	SB17035_07215	SB17036_12885	SB17037_11795	SB17038_03255	SB17039_21855	SB17040_20615	SB17042_07135
yehL		Uncharacterized protein YehL	46	46	1	99	1114				1088	1088	1088	2E151-R_04155	HBI01_18505	HBI05_09735	HBI04_16980	HBI02_06010	HBI03_06050	PS148-R_02435	PS15001_15315	PS15002_04070	PS16001_02465	PS16002_15685	PS16003_05785	PS16004_03060	PS16005_19190	PS184-R_08015	PS310-R_07185	PS378-R_02435	PS57-R_05295	RL316_15565	RL320_12535	RL97_05995	SA17021_12760	SA17022_01805	SA17023_08995	SA17024_19855	SA17101_03545	SB17032_24465	SB17033_19060	SB17034_14560	SB17035_22165	SB17036_03405	SB17037_20490	SB17038_05305	SB17039_03560	SB17040_02655	SB17042_08375
spy		ATP-independent periplasmic protein-refolding chaperone Spy	46	46	1	99	9394				485	485	485	2E151-R_05940	HBI01_19485	HBI05_23665	HBI04_12720	HBI02_21720	HBI03_00465	PS148-R_10300	PS15001_24945	PS15002_07240	PS16001_21720	PS16002_21265	PS16003_25080	PS16004_26020	PS16005_19810	PS184-R_00845	PS310-R_01880	PS378-R_07580	PS57-R_09140	RL316_21795	RL320_00450	RL97_03880	SA17021_07930	SA17022_20645	SA17023_18930	SA17024_11600	SA17101_21935	SB17032_20370	SB17033_25510	SB17034_03905	SB17035_14935	SB17036_18970	SB17037_07660	SB17038_07725	SB17039_16410	SB17040_14560	SB17042_10730
mutL		DNA mismatch repair endonuclease MutL	46	46	1	99	4166				1847	1847	1847	2E151-R_12450	HBI01_02630	HBI05_22005	HBI04_19285	HBI02_04670	HBI03_13525	PS148-R_13145	PS15001_17510	PS15002_05760	PS16001_20635	PS16002_04520	PS16003_22855	PS16004_09220	PS16005_15415	PS184-R_12020	PS310-R_14395	PS378-R_12625	PS57-R_10565	RL316_08775	RL320_02155	RL97_15660	SA17021_06240	SA17022_11090	SA17023_14000	SA17024_23535	SA17101_23885	SB17032_08130	SB17033_09335	SB17034_08015	SB17035_00280	SB17036_24405	SB17037_04455	SB17038_13670	SB17039_07200	SB17040_07220	SB17042_14030
yedF		sulfurtransferase-like selenium metabolism protein YedF	46	46	1	99	9611				233	233	233	2E151-R_09585	HBI01_01305	HBI05_08365	HBI04_07460	HBI02_19105	HBI03_07820	PS148-R_09355	PS15001_03435	PS15002_16115	PS16001_07510	PS16002_20310	PS16003_21115	PS16004_16190	PS16005_21055	PS184-R_01800	PS310-R_00925	PS378-R_06625	PS57-R_12080	RL316_11940	RL320_08440	RL97_17965	SA17021_08885	SA17022_21600	SA17023_19880	SA17024_12555	SA17101_00015	SB17032_23770	SB17033_17975	SB17034_04860	SB17035_04125	SB17036_20335	SB17037_02135	SB17038_19320	SB17039_17365	SB17040_13605	SB17042_13855
psuT		Putative pseudouridine transporter	46	46	1	99	50				398	1250	1138	2E151-R_04385	HBI01_18275	HBI05_09965	HBI04_17215	HBI02_06240	HBI03_11005	PS148-R_02665	PS15001_15085	PS15002_03840	PS16001_02695	PS16002_15455	PS16003_06015	PS16004_02830	PS16005_14650	PS184-R_07785	PS310-R_07415	PS378-R_02665	PS57-R_05065	RL316_15335	RL320_12765	RL97_05765	SA17021_12990	SA17022_02035	SA17023_09225	SA17024_20085	SA17101_03775	SB17032_24230	SB17033_18830	SB17034_14330	SB17035_21935	SB17036_03175	SB17037_06920	SB17038_05535	SB17039_03330	SB17040_02425	SB17042_08135
pat		protein lysine acetyltransferase	46	46	1	99	237				2660	2660	2660	2E151-R_15275	HBI01_20155	HBI05_11530	HBI04_24080	HBI02_13055	HBI03_00685	PS148-R_14130	PS15001_13095	PS15002_12945	PS16001_04685	PS16002_08175	PS16003_08010	PS16004_06615	PS16005_20315	PS184-R_13975	PS310-R_12390	PS378-R_11590	PS57-R_14435	RL316_09470	RL320_25845	RL97_10770	SA17021_03395	SA17022_04025	SA17023_20305	SA17024_02355	SA17101_16725	SB17032_15750	SB17033_07590	SB17034_11415	SB17035_19940	SB17036_04940	SB17037_15540	SB17038_07525	SB17039_09350	SB17040_00435	SB17042_00035
entB		enterobactin biosynthesis bifunctional isochorismatase/aryl carrier protein EntB	46	46	1	99	1498				857	857	857	2E151-R_17695	HBI01_21360	HBI05_02340	HBI04_06840	HBI02_20120	HBI03_05965	PS148-R_17395	PS15001_08960	PS15002_10515	PS16001_16245	PS16002_05965	PS16003_13580	PS16004_15850	PS16005_15050	PS184-R_17240	PS310-R_19465	PS378-R_16960	PS57-R_16855	RL316_07590	RL320_21880	RL97_19675	SA17021_02375	SA17022_07400	SA17023_13385	SA17024_01980	SA17101_23225	SB17032_17970	SB17033_05835	SB17034_21520	SB17035_07760	SB17036_02010	SB17037_12340	SB17038_03800	SB17039_10265	SB17040_21150	SB17042_06620
fxsA		membrane protein FxsA	46	46	1	99	7385				476	476	476	2E151-R_22085	HBI01_12135	HBI05_20165	HBI04_19450	HBI02_03930	HBI03_09385	PS148-R_22430	PS15001_10865	PS15002_05915	PS16001_20795	PS16002_04360	PS16003_23015	PS16004_17805	PS16005_15255	PS184-R_22185	PS310-R_22800	PS378-R_22550	PS57-R_22550	RL316_08615	RL320_01995	RL97_15820	SA17021_06400	SA17022_11250	SA17023_14160	SA17024_23690	SA17101_08410	SB17032_22935	SB17033_09175	SB17034_07855	SB17035_00120	SB17036_24245	SB17037_04295	SB17038_13510	SB17039_07360	SB17040_07380	SB17042_14185
cysM		cysteine synthase B	46	46	1	99	451				911	911	911	2E151-R_24020	HBI01_25640	HBI05_01205	HBI04_16730	HBI02_08450	HBI03_23615	PS148-R_23710	PS15001_13845	PS15002_08355	PS16001_03935	PS16002_06595	PS16003_07260	PS16004_01150	PS16005_10320	PS184-R_24330	PS310-R_11400	PS378-R_10600	PS57-R_23495	RL316_10220	RL320_26595	RL97_13175	SA17021_04145	SA17022_03275	SA17023_10470	SA17024_18450	SA17101_05020	SB17032_14895	SB17033_21620	SB17034_12165	SB17035_20690	SB17036_14725	SB17037_05675	SB17038_06775	SB17039_09505	SB17040_01185	SB17042_00890
sfsA		DNA/RNA nuclease SfsA	46	46	1	99	8794				704	704	704	2E151-R_11135	HBI01_23985	HBI05_01565	HBI04_17985	HBI02_03405	HBI03_18745	PS148-R_08125	PS15001_12170	PS15002_25675	PS16001_12530	PS16002_23160	PS16003_11800	PS16004_23210	PS16005_24710	PS184-R_10705	PS310-R_11005	PS378-R_09490	PS57-R_07275	RL316_06645	RL320_04710	RL97_07585	SA17021_21770	SA17022_26220	SA17023_11860	SA17024_21215	SA17101_13260	SB17032_27275	SB17033_00310	SB17034_00600	SB17035_14305	SB17036_11115	SB17037_10620	SB17038_17515	SB17039_19885	SB17040_23555	SB17042_02220
ugd		UDP-glucose 6-dehydrogenase	46	46	1	99	9798				1166	1166	1166	2E151-R_08680	HBI01_05590	HBI05_11630	HBI04_26055	HBI02_00255	HBI03_02885	PS148-R_08450	PS15001_19870	PS15002_10880	PS16001_17390	PS16002_14105	PS16003_16090	PS16004_08305	PS16005_13500	PS184-R_02700	PS310-R_00020	PS378-R_05720	PS57-R_20100	RL316_04590	RL320_06860	RL97_24970	SA17021_03325	SA17022_22505	SA17023_15790	SA17024_26425	SA17101_17330	SB17032_28985	SB17033_14775	SB17034_10675	SB17035_18155	SB17036_02520	SB17037_26135	SB17038_22915	SB17039_23800	SB17040_12700	SB17042_08890
recQ		ATP-dependent DNA helicase RecQ	46	46	1	99	4449				1814	1835	1819	2E151-R_18280	HBI01_20900	HBI05_20380	HBI04_09395	HBI02_19935	HBI03_13830	PS148-R_18645	PS15001_24040	PS15002_16990	PS16001_15745	PS16002_24440	PS16003_02715	PS16004_22250	PS16005_00745	PS184-R_18490	PS310-R_20115	PS378-R_18935	PS57-R_18085	RL316_11120	RL320_01140	RL97_00060	SA17021_23595	SA17022_13455	SA17023_22565	SA17024_13530	SA17101_09650	SB17032_00505	SB17033_25195	SB17034_22200	SB17035_25900	SB17036_16815	SB17037_23205	SB17038_15500	SB17039_14695	SB17040_12360	SB17042_17345
glmU		bifunctional UDP-N-acetylglucosamine diphosphorylase/glucosamine-1-phosphate N-acetyltransferase GlmU	46	46	1	99	4685				1370	1370	1370	2E151-R_08505	HBI01_09895	HBI05_22185	HBI04_23245	HBI02_16910	HBI03_02555	PS148-R_06965	PS15001_11185	PS15002_15285	PS16001_00140	PS16002_01565	PS16003_24085	PS16004_09285	PS16005_01775	PS184-R_08390	PS310-R_08695	PS378-R_07890	PS57-R_06830	RL316_01555	RL320_07380	RL97_07955	SA17021_14185	SA17022_01175	SA17023_05040	SA17024_03700	SA17101_00950	SB17032_12780	SB17033_02400	SB17034_13400	SB17035_10350	SB17036_01470	SB17037_21910	SB17038_11480	SB17039_01210	SB17040_05685	SB17042_15760
modC		molybdenum ABC transporter ATP-binding protein ModC	46	46	1	99	9910				1058	1058	1058	2E151-R_02130	HBI01_04965	HBI05_19585	HBI04_26505	HBI02_11015	HBI03_03780	PS148-R_03890	PS15001_12060	PS15002_09705	PS16001_16660	PS16002_09185	PS16003_09555	PS16004_13670	PS16005_10855	PS184-R_04855	PS310-R_05160	PS378-R_05600	PS57-R_03820	RL316_17405	RL320_15430	RL97_08760	SA17021_01550	SA17022_06860	SA17023_12560	SA17024_01155	SA17101_20420	SB17032_06310	SB17033_05010	SB17034_20695	SB17035_06935	SB17036_03990	SB17037_11515	SB17038_02975	SB17039_22135	SB17040_20335	SB17042_07475
ispE		4-(cytidine 5'-diphospho)-2-C-methyl-D-erythritol kinase	46	46	1	99	6062				851	851	851	2E151-R_19005	HBI01_08395	HBI05_25150	HBI04_25465	HBI02_07345	HBI03_17920	PS148-R_18250	PS15001_04785	PS15002_18995	PS16001_25715	PS16002_08600	PS16003_16850	PS16004_00035	PS16005_04550	PS184-R_18095	PS310-R_15495	PS378-R_18110	PS57-R_17695	RL316_13610	RL320_25555	RL97_21755	SA17021_24780	SA17022_18445	SA17023_02710	SA17024_20605	SA17101_19655	SB17032_12450	SB17033_07265	SB17034_10995	SB17035_16475	SB17036_09665	SB17037_19005	SB17038_00435	SB17039_25250	SB17040_03970	SB17042_10305
ada		bifunctional DNA-binding transcriptional regulator/O6-methylguanine-DNA methyltransferase Ada	46	46	1	99	10337				542	1064	1038	2E151-R_04650	HBI01_25010	HBI05_21665	HBI04_12575	HBI02_09490	HBI03_20480	PS148-R_02930	PS15001_14820	PS15002_03575	PS16001_02960	PS16002_11445	PS16003_06280	PS16004_02565	PS16005_14915	PS184-R_07520	PS310-R_07680	PS378-R_02930	PS57-R_04800	RL316_15070	RL320_13110	RL97_05500	SA17021_22575	SA17022_02300	SA17023_09495	SA17024_14600	SA17101_04025	SB17032_15805	SB17033_12235	SB17034_18635	SB17035_21670	SB17036_02910	SB17037_06655	SB17038_05800	SB17039_03065	SB17040_02160	SB17042_01905
emrD		multidrug efflux MFS transporter EmrD	46	46	1	99	4748				1184	1184	1184	2E151-R_08230	HBI01_09620	HBI05_05935	HBI04_02155	HBI02_06545	HBI03_20135	PS148-R_06690	PS15001_11460	PS15002_15560	PS16001_00415	PS16002_01290	PS16003_03470	PS16004_08275	PS16005_01500	PS184-R_08665	PS310-R_08970	PS378-R_08165	PS57-R_06555	RL316_01830	RL320_07655	RL97_07680	SA17021_14460	SA17022_00900	SA17023_04765	SA17024_03975	SA17101_01275	SB17032_10650	SB17033_02125	SB17034_13675	SB17035_10625	SB17036_01195	SB17037_21635	SB17038_11205	SB17039_01485	SB17040_05410	SB17042_16060
pitB		inorganic phosphate transporter PitB	46	46	1	99	8430				1499	1499	1499	2E151-R_00580	HBI01_17490	HBI05_04390	HBI04_22995	HBI02_16585	HBI03_08960	PS148-R_01460	PS15001_09520	PS15002_21065	PS16001_09135	PS16002_24970	PS16003_01190	PS16004_04700	PS16005_07690	PS184-R_04195	PS310-R_03615	PS378-R_01460	PS57-R_01460	RL316_25420	RL320_24985	RL97_23570	SA17021_10510	SA17022_05065	SA17023_05375	SA17024_08425	SA17101_18435	SB17032_04970	SB17033_24205	SB17034_07195	SB17035_02115	SB17036_08685	SB17037_01610	SB17038_01110	SB17039_00860	SB17040_09505	SB17042_06435
elbB		isoprenoid biosynthesis glyoxalase ElbB	46	46	1	99	9051				653	653	653	2E151-R_01725	HBI01_07345	HBI05_13635	HBI04_02005	HBI02_24640	HBI03_19130	PS148-R_00315	PS15001_07175	PS15002_22210	PS16001_10285	PS16002_26115	PS16003_02335	PS16004_04020	PS16005_08840	PS184-R_03050	PS310-R_04760	PS378-R_00315	PS57-R_00315	RL316_26565	RL320_23840	RL97_17435	SA17021_09365	SA17022_06210	SA17023_06520	SA17024_09570	SA17101_11450	SB17032_16610	SB17033_23060	SB17034_10025	SB17035_24455	SB17036_16235	SB17037_16755	SB17038_01630	SB17039_05050	SB17040_07815	SB17042_05330
slmA		nucleoid occlusion factor SlmA	46	46	1	99	4804				596	596	596	2E151-R_07855	HBI01_04635	HBI05_08705	HBI04_19900	HBI02_04165	HBI03_07735	PS148-R_06315	PS15001_05625	PS15002_06320	PS16001_00790	PS16002_00915	PS16003_03845	PS16004_07780	PS16005_01125	PS184-R_09040	PS310-R_09345	PS378-R_08540	PS57-R_06180	RL316_03070	RL320_09425	RL97_08255	SA17021_14835	SA17022_00525	SA17023_04390	SA17024_04350	SA17101_01465	SB17032_18540	SB17033_01750	SB17034_02175	SB17035_06105	SB17036_00820	SB17037_21260	SB17038_21525	SB17039_01860	SB17040_05035	SB17042_19320
yjgA		ribosome-associated protein	46	46	1	99	6554				551	557	551	2E151-R_12805	HBI01_02275	HBI05_02895	HBI04_10025	HBI02_04795	HBI03_12020	PS148-R_12790	PS15001_17865	PS15002_05405	PS16001_20280	PS16002_04875	PS16003_22500	PS16004_08865	PS16005_15770	PS184-R_12375	PS310-R_14040	PS378-R_12980	PS57-R_10920	RL316_09130	RL320_02510	RL97_15305	SA17021_05885	SA17022_10735	SA17023_13645	SA17024_23180	SA17101_24225	SB17032_08465	SB17033_10565	SB17034_08370	SB17035_00635	SB17036_24760	SB17037_04810	SB17038_14025	SB17039_06845	SB17040_06865	SB17042_19045
torC		pentaheme c-type cytochrome TorC	46	46	1	99	742				1172	1172	1172	2E151-R_03215	HBI01_01860	HBI05_14390	HBI04_10680	HBI02_15445	HBI03_21560	PS148-R_04975	PS15001_22670	PS15002_01870	PS16001_18105	PS16002_10345	PS16003_15425	PS16004_20025	PS16005_18865	PS184-R_05940	PS310-R_06245	PS378-R_04515	PS57-R_02735	RL316_24730	RL320_23455	RL97_06400	SA17021_00355	SA17022_09020	SA17023_01750	SA17024_16575	SA17101_02440	SB17032_21865	SB17033_03050	SB17034_19610	SB17035_04765	SB17036_10320	SB17037_03130	SB17038_12850	SB17039_23220	SB17040_19250	SB17042_15145
kdgR		DNA-binding transcriptional regulator KdgR	46	46	1	99	9488				791	791	791	2E151-R_05535	HBI01_19890	HBI05_24090	HBI04_03120	HBI02_22145	HBI03_01640	PS148-R_09895	PS15001_24540	PS15002_06835	PS16001_21315	PS16002_20860	PS16003_24675	PS16004_25615	PS16005_20505	PS184-R_01250	PS310-R_01475	PS378-R_07175	PS57-R_09545	RL316_21390	RL320_00045	RL97_03475	SA17021_08335	SA17022_21050	SA17023_19335	SA17024_12005	SA17101_00650	SB17032_19930	SB17033_25915	SB17034_04310	SB17035_08995	SB17036_19375	SB17037_07255	SB17038_19870	SB17039_16815	SB17040_14155	SB17042_13300
nanT		sialic acid transporter NanT	46	46	1	99	9041				1490	1490	1490	2E151-R_01770	HBI01_07390	HBI05_13685	HBI04_02050	HBI02_24690	HBI03_19175	PS148-R_00270	PS15001_07220	PS15002_22255	PS16001_10330	PS16002_26160	PS16003_02380	PS16004_04065	PS16005_08885	PS184-R_03005	PS310-R_04805	PS378-R_00270	PS57-R_00270	RL316_26610	RL320_23795	RL97_17480	SA17021_09320	SA17022_06255	SA17023_06565	SA17024_09615	SA17101_11500	SB17032_16560	SB17033_23015	SB17034_09875	SB17035_24500	SB17036_16190	SB17037_16800	SB17038_01585	SB17039_05095	SB17040_07770	SB17042_05280
ytfB		cell division protein YtfB	46	46	1	99	6580				638	638	638	2E151-R_12665	HBI01_02415	HBI05_21770	HBI04_10160	HBI02_04940	HBI03_12150	PS148-R_12930	PS15001_17725	PS15002_05545	PS16001_20420	PS16002_04735	PS16003_22640	PS16004_09005	PS16005_15630	PS184-R_12235	PS310-R_14180	PS378-R_12840	PS57-R_10780	RL316_08990	RL320_02370	RL97_15445	SA17021_06025	SA17022_10875	SA17023_13785	SA17024_23320	SA17101_24075	SB17032_08315	SB17033_10705	SB17034_08230	SB17035_00495	SB17036_24620	SB17037_04670	SB17038_13885	SB17039_06985	SB17040_07005	SB17042_19195
digH		Glycosyl hydrolase DigH	46	46	1	99	3257				1319	1319	1319	2E151-R_25040	HBI01_12560	HBI05_06835	HBI04_13040	HBI02_26375	HBI03_13890	PS148-R_25040	PS15001_19155	PS15002_19780	PS16001_21025	PS16002_12875	PS16003_16490	PS16004_16950	PS16005_22625	PS184-R_25185	PS310-R_25100	PS378-R_25245	PS57-R_25095	RL316_04195	RL320_10740	RL97_12195	SA17021_22195	SA17022_19350	SA17023_26225	SA17024_18705	SA17101_25545	SB17032_25475	SB17033_21870	SB17034_05350	SB17035_10115	SB17036_18385	SB17037_17325	SB17038_15110	SB17039_08625	SB17040_18255	SB17042_22500
glpB		glycerol-3-phosphate dehydrogenase subunit GlpB	46	46	1	99	10299				302	1259	1236	2E151-R_04800	HBI01_24860	HBI05_21485	HBI04_22530	HBI02_25480	HBI03_02720	PS148-R_03080	PS15001_14670	PS15002_03425	PS16001_03110	PS16002_11595	PS16003_06430	PS16004_02415	PS16005_18215	PS184-R_07370	PS310-R_07830	PS378-R_03080	PS57-R_04650	RL316_14920	RL320_13260	RL97_13540	SA17021_22725	SA17022_02450	SA17023_09645	SA17024_17625	SA17101_04155	SB17032_13815	SB17033_12085	SB17034_18785	SB17035_21520	SB17036_15550	SB17037_06505	SB17038_05950	SB17039_02915	SB17040_02010	SB17042_01730
holD		DNA polymerase III subunit psi	46	46	1	99	8630				413	413	413	2E151-R_23080	HBI01_11910	HBI05_18880	HBI04_22800	HBI02_10660	HBI03_09000	PS148-R_25880	PS15001_18445	PS15002_24430	PS16001_19615	PS16002_19520	PS16003_21835	PS16004_20775	PS16005_23495	PS184-R_23180	PS310-R_23405	PS378-R_23815	PS57-R_25855	RL316_05500	RL320_16275	RL97_01520	SA17021_24355	SA17022_24915	SA17023_21350	SA17024_22510	SA17101_25185	SB17032_28275	SB17033_03925	SB17034_03180	SB17035_13000	SB17036_12420	SB17037_00075	SB17038_16205	SB17039_18585	SB17040_22250	SB17042_03215
ycgL		Protein YcgL	46	46	1	99	5997				293	293	293	2E151-R_18835	HBI01_08565	HBI05_24960	HBI04_13600	HBI02_07155	HBI03_01360	PS148-R_18080	PS15001_04955	PS15002_19165	PS16001_25885	PS16002_12980	PS16003_16680	PS16004_00205	PS16005_04380	PS184-R_17925	PS310-R_15665	PS378-R_18280	PS57-R_17525	RL316_13780	RL320_25725	RL97_21925	SA17021_24610	SA17022_18615	SA17023_02540	SA17024_20775	SA17101_03205	SB17032_12260	SB17033_07435	SB17034_13030	SB17035_16305	SB17036_09495	SB17037_19175	SB17038_00265	SB17039_25420	SB17040_04140	SB17042_10110
gltI		glutamate/aspartate ABC transporter substrate-binding protein GltI	46	46	1	99	1563				908	908	908	2E151-R_17985	HBI01_10615	HBI05_02040	HBI04_14235	HBI02_14130	HBI03_16315	PS148-R_17105	PS15001_08670	PS15002_10225	PS16001_17190	PS16002_17285	PS16003_09020	PS16004_15350	PS16005_17755	PS184-R_16950	PS310-R_19755	PS378-R_17250	PS57-R_17145	RL316_07880	RL320_22170	RL97_10015	SA17021_02085	SA17022_07110	SA17023_13095	SA17024_01690	SA17101_23530	SB17032_17660	SB17033_05545	SB17034_21230	SB17035_07470	SB17036_02300	SB17037_12050	SB17038_03510	SB17039_10520	SB17040_20860	SB17042_06925
dacD		serine-type D-Ala-D-Ala carboxypeptidase DacD	46	46	1	99	9770				1166	1166	1166	2E151-R_08775	HBI01_05495	HBI05_11725	HBI04_16100	HBI02_00170	HBI03_02790	PS148-R_08545	PS15001_19775	PS15002_10975	PS16001_17485	PS16002_14010	PS16003_16185	PS16004_08400	PS16005_13595	PS184-R_02605	PS310-R_00115	PS378-R_05815	PS57-R_20195	RL316_04685	RL320_06955	RL97_25065	SA17021_03230	SA17022_22410	SA17023_15695	SA17024_26330	SA17101_17180	SB17032_29140	SB17033_14870	SB17034_10580	SB17035_18060	SB17036_02615	SB17037_26040	SB17038_22820	SB17039_23895	SB17040_12795	SB17042_08995
cpoB		cell division protein CpoB	46	46	1	99	9893				791	791	791	2E151-R_20070	HBI01_04850	HBI05_19470	HBI04_26620	HBI02_21025	HBI03_03665	PS148-R_19965	PS15001_08250	PS15002_09805	PS16001_16770	PS16002_09300	PS16003_09440	PS16004_13785	PS16005_10970	PS184-R_19825	PS310-R_21730	PS378-R_20535	PS57-R_19715	RL316_08300	RL320_22590	RL97_08645	SA17021_01665	SA17022_06745	SA17023_12675	SA17024_01270	SA17101_20305	SB17032_06195	SB17033_05125	SB17034_20810	SB17035_07050	SB17036_03875	SB17037_11630	SB17038_03090	SB17039_22020	SB17040_20450	SB17042_07360
rlmG		23S rRNA (guanine(1835)-N(2))-methyltransferase RlmG	46	46	1	99	9182				1136	1136	1136	2E151-R_01125	HBI01_06745	HBI05_22695	HBI04_24330	HBI02_10915	HBI03_05815	PS148-R_00915	PS15001_06575	PS15002_21610	PS16001_09685	PS16002_25515	PS16003_01735	PS16004_03420	PS16005_08240	PS184-R_03650	PS310-R_04160	PS378-R_00915	PS57-R_00915	RL316_25965	RL320_24440	RL97_16835	SA17021_09965	SA17022_05610	SA17023_05920	SA17024_08970	SA17101_10795	SB17032_17255	SB17033_23660	SB17034_06650	SB17035_23855	SB17036_09230	SB17037_16155	SB17038_02230	SB17039_15120	SB17040_08415	SB17042_05970
holE		DNA polymerase III subunit theta	46	46	1	99	9505				230	230	230	2E151-R_10035	HBI01_00855	HBI05_15780	HBI04_03210	HBI02_22230	HBI03_01730	PS148-R_09805	PS15001_03885	PS15002_16565	PS16001_07060	PS16002_20760	PS16003_20665	PS16004_19400	PS16005_20605	PS184-R_01350	PS310-R_01375	PS378-R_07075	PS57-R_12530	RL316_12390	RL320_10525	RL97_10655	SA17021_08435	SA17022_21150	SA17023_19430	SA17024_12105	SA17101_00565	SB17032_19845	SB17033_15645	SB17034_04410	SB17035_03675	SB17036_22660	SB17037_07155	SB17038_19770	SB17039_16915	SB17040_14055	SB17042_13385
pstS		phosphate ABC transporter substrate-binding protein PstS	46	46	1	99	4687				1040	1040	1040	2E151-R_08495	HBI01_09885	HBI05_22155	HBI04_23235	HBI02_20520	HBI03_12905	PS148-R_06955	PS15001_11195	PS15002_15295	PS16001_00150	PS16002_01555	PS16003_24095	PS16004_09275	PS16005_01765	PS184-R_08400	PS310-R_08705	PS378-R_07900	PS57-R_06820	RL316_01565	RL320_07390	RL97_07945	SA17021_14195	SA17022_01165	SA17023_05030	SA17024_03710	SA17101_00980	SB17032_12790	SB17033_02390	SB17034_13410	SB17035_10360	SB17036_01460	SB17037_21900	SB17038_11470	SB17039_01220	SB17040_05675	SB17042_15770
yjjU		Uncharacterized protein YjjU	46	46	1	99	8636				1073	1073	1073	2E151-R_10185	HBI01_17105	HBI05_18910	HBI04_22770	HBI02_21160	HBI03_09030	PS148-R_07170	PS15001_20500	PS15002_24725	PS16001_13485	PS16002_24115	PS16003_10845	PS16004_24165	PS16005_23755	PS184-R_09750	PS310-R_10055	PS378-R_10445	PS57-R_08230	RL316_05695	RL320_03755	RL97_04530	SA17021_20810	SA17022_25265	SA17023_23915	SA17024_22170	SA17101_25215	SB17032_28245	SB17033_04280	SB17034_03525	SB17035_13350	SB17036_12075	SB17037_00420	SB17038_16555	SB17039_18930	SB17040_22600	SB17042_03185
tdcD		propionate kinase	46	46	1	99	9145				1208	1208	1208	2E151-R_01270	HBI01_06890	HBI05_22845	HBI04_24475	HBI02_11265	HBI03_15525	PS148-R_00770	PS15001_06720	PS15002_21755	PS16001_09830	PS16002_25660	PS16003_01880	PS16004_03565	PS16005_08385	PS184-R_03505	PS310-R_04305	PS378-R_00770	PS57-R_00770	RL316_26110	RL320_24295	RL97_16980	SA17021_09820	SA17022_05755	SA17023_06065	SA17024_09115	SA17101_10965	SB17032_17100	SB17033_23515	SB17034_06505	SB17035_24000	SB17036_18600	SB17037_16300	SB17038_02085	SB17039_04595	SB17040_08270	SB17042_05815
arnD		4-deoxy-4-formamido-L-arabinose-phosphoundecaprenol deformylase	46	46	1	99	10282				833	890	888	2E151-R_04875	HBI01_24785	HBI05_05175	HBI04_04565	HBI02_25555	HBI03_00885	PS148-R_03155	PS15001_14595	PS15002_03350	PS16001_03185	PS16002_11670	PS16003_06505	PS16004_01940	PS16005_18290	PS184-R_07295	PS310-R_07905	PS378-R_03155	PS57-R_04575	RL316_14845	RL320_13335	RL97_13465	SA17021_22800	SA17022_02525	SA17023_09720	SA17024_17700	SA17101_04210	SB17032_13895	SB17033_12010	SB17034_18860	SB17035_21445	SB17036_15475	SB17037_06430	SB17038_06025	SB17039_02840	SB17040_01935	SB17042_01655
prpD		bifunctional 2-methylcitrate dehydratase/aconitate hydratase	46	46	1	99	1872				1451	1451	1451	2E151-R_11710	HBI01_24395	HBI05_10160	HBI04_02645	HBI02_11895	HBI03_09830	PS148-R_11430	PS15001_01050	PS15002_04825	PS16001_06260	PS16002_02415	PS16003_10065	PS16004_10540	PS16005_16630	PS184-R_11280	PS310-R_12680	PS378-R_12330	PS57-R_09825	RL316_01150	RL320_11460	RL97_02150	SA17021_05195	SA17022_22960	SA17023_11455	SA17024_13010	SA17101_14950	SB17032_02500	SB17033_10100	SB17034_09325	SB17035_01145	SB17036_17230	SB17037_24315	SB17038_25945	SB17039_11780	SB17040_17740	SB17042_16420
cysA		sulfate/thiosulfate ABC transporter ATP-binding protein CysA	46	46	1	99	450				1097	1097	1097	2E151-R_24025	HBI01_25635	HBI05_01210	HBI04_16735	HBI02_08445	HBI03_23620	PS148-R_23705	PS15001_13840	PS15002_08360	PS16001_03940	PS16002_06600	PS16003_07265	PS16004_01155	PS16005_10315	PS184-R_24325	PS310-R_11405	PS378-R_10605	PS57-R_23500	RL316_10215	RL320_26590	RL97_13180	SA17021_04140	SA17022_03280	SA17023_10475	SA17024_18455	SA17101_05025	SB17032_14900	SB17033_21615	SB17034_12160	SB17035_20685	SB17036_14720	SB17037_05670	SB17038_06780	SB17039_09500	SB17040_01180	SB17042_00885
dpiB		sensor histidine kinase DpiB	46	46	1	99	1524				1658	1658	1658	2E151-R_17815	HBI01_21220	HBI05_02220	HBI04_07005	HBI02_14310	HBI03_14515	PS148-R_17275	PS15001_08840	PS15002_10395	PS16001_16125	PS16002_05845	PS16003_13460	PS16004_15970	PS16005_14930	PS184-R_17120	PS310-R_19585	PS378-R_17080	PS57-R_16975	RL316_07710	RL320_22000	RL97_10185	SA17021_02255	SA17022_07280	SA17023_13265	SA17024_01860	SA17101_23350	SB17032_17845	SB17033_05715	SB17034_21400	SB17035_07640	SB17036_02130	SB17037_12220	SB17038_03680	SB17039_10690	SB17040_21030	SB17042_06745
yahG		Uncharacterized protein YahG	46	46	1	99	1855				1418	1418	1418	2E151-R_11665	HBI01_24350	HBI05_10260	HBI04_02570	HBI02_11995	HBI03_20615	PS148-R_11385	PS15001_01005	PS15002_04870	PS16001_06215	PS16002_02460	PS16003_10020	PS16004_10585	PS16005_16585	PS184-R_11235	PS310-R_12635	PS378-R_12375	PS57-R_09780	RL316_01195	RL320_11505	RL97_02105	SA17021_05240	SA17022_22915	SA17023_11410	SA17024_13055	SA17101_14860	SB17032_02405	SB17033_10145	SB17034_09370	SB17035_01100	SB17036_17275	SB17037_24360	SB17038_25990	SB17039_11825	SB17040_17785	SB17042_16515
yjbQ		UPF0047 protein YjbQ	46	46	1	99	2425				416	416	416	2E151-R_21160	HBI01_22190	HBI05_19695	HBI04_06520	HBI02_23565	HBI03_04300	PS148-R_21400	PS15001_02445	PS15002_12670	PS16001_08395	PS16002_03045	PS16003_04850	PS16004_18355	PS16005_12560	PS184-R_21370	PS310-R_21290	PS378-R_21625	PS57-R_21330	RL316_23560	RL320_06405	RL97_22675	SA17021_11720	SA17022_04415	SA17023_01085	SA17024_03200	SA17101_07975	SB17032_08850	SB17033_08655	SB17034_01320	SB17035_11115	SB17036_08035	SB17037_14640	SB17038_09385	SB17039_07905	SB17040_06260	SB17042_17805
perM		Putative permease PerM	46	46	1	99	381				1061	1061	1061	2E151-R_14550	HBI01_25370	HBI05_11865	HBI04_08485	HBI02_08110	HBI03_21115	PS148-R_14855	PS15001_13575	PS15002_08625	PS16001_04205	PS16002_06975	PS16003_07530	PS16004_01420	PS16005_10050	PS184-R_14700	PS310-R_11665	PS378-R_10865	PS57-R_13710	RL316_09950	RL320_26325	RL97_11250	SA17021_03875	SA17022_03545	SA17023_22035	SA17024_17450	SA17101_05380	SB17032_15235	SB17033_08070	SB17034_11895	SB17035_20420	SB17036_14455	SB17037_05405	SB17038_07045	SB17039_08870	SB17040_00915	SB17042_00550
aspC		aspartate transaminase	46	46	1	99	818				1190	1190	1190	2E151-R_02950	HBI01_01595	HBI05_04955	HBI04_00195	HBI02_18970	HBI03_21295	PS148-R_04710	PS15001_22935	PS15002_02135	PS16001_05210	PS16002_10610	PS16003_15160	PS16004_14530	PS16005_19130	PS184-R_05675	PS310-R_05980	PS378-R_04780	PS57-R_03000	RL316_16585	RL320_14610	RL97_06135	SA17021_00620	SA17022_09285	SA17023_16380	SA17024_16310	SA17101_02100	SB17032_21525	SB17033_03315	SB17034_19875	SB17035_04500	SB17036_10585	SB17037_03395	SB17038_13115	SB17039_22955	SB17040_19515	SB17042_15490
cueR		Cu(I)-responsive transcriptional regulator	46	46	1	99	2050				407	407	407	2E151-R_12395	HBI01_14475	HBI05_12900	HBI04_08400	HBI02_26345	HBI03_22755	PS148-R_12115	PS15001_01735	PS15002_04140	PS16001_06945	PS16002_01730	PS16003_10750	PS16004_00280	PS16005_17320	PS184-R_11965	PS310-R_13365	PS378-R_11645	PS57-R_10510	RL316_00465	RL320_10775	RL97_13705	SA17021_04510	SA17022_23645	SA17023_12155	SA17024_07820	SA17101_14570	SB17032_07245	SB17033_09415	SB17034_08640	SB17035_08140	SB17036_06305	SB17037_23630	SB17038_25260	SB17039_11095	SB17040_00380	SB17042_18145
queF		NADPH-dependent 7-cyano-7-deazaguanine reductase QueF	46	46	1	99	7725				848	848	848	2E151-R_16575	HBI01_09165	HBI05_20845	HBI04_20785	HBI02_26905	HBI03_12635	PS148-R_15820	PS15001_06255	PS15002_00180	PS16001_01865	PS16002_17815	PS16003_18160	PS16004_11380	PS16005_07150	PS184-R_15665	PS310-R_18350	PS378-R_15840	PS57-R_15260	RL316_18545	RL320_21195	RL97_14985	SA17021_19935	SA17022_07985	SA17023_16155	SA17024_24845	SA17101_06755	SB17032_01485	SB17033_13750	SB17034_15405	SB17035_19230	SB17036_05955	SB17037_19370	SB17038_10715	SB17039_06270	SB17040_11025	SB17042_12950
yhhS		Uncharacterized MFS-type transporter YhhS	46	46	1	99	7001				1250	1259	1256	2E151-R_13740	HBI01_04050	HBI05_18315	HBI04_22395	HBI02_06925	HBI03_11620	PS148-R_13820	PS15001_02775	PS15002_23190	PS16001_14350	PS16002_18345	PS16003_12800	PS16004_18815	PS16005_05905	PS184-R_13305	PS310-R_15065	PS378-R_14280	PS57-R_12900	RL316_20190	RL320_14055	RL97_00665	SA17021_15765	SA17022_16810	SA17023_08350	SA17024_05195	SA17101_26445	SB17032_03370	SB17033_11515	SB17034_25695	SB17035_02825	SB17036_23410	SB17037_24870	SB17038_18135	SB17039_12070	SB17040_25090	SB17042_04375
pmrD		signal transduction protein PmrD	46	46	1	99	10278				266	266	266	2E151-R_04895	HBI01_24765	HBI05_05195	HBI04_04585	HBI02_25575	HBI03_00905	PS148-R_03175	PS15001_14575	PS15002_03330	PS16001_03205	PS16002_11690	PS16003_06525	PS16004_01920	PS16005_18310	PS184-R_07275	PS310-R_07925	PS378-R_03175	PS57-R_04555	RL316_14825	RL320_13355	RL97_13445	SA17021_22820	SA17022_02545	SA17023_09740	SA17024_17720	SA17101_04230	SB17032_13915	SB17033_11990	SB17034_18880	SB17035_21425	SB17036_15455	SB17037_06410	SB17038_06045	SB17039_02820	SB17040_01915	SB17042_01635
ydhI		Uncharacterized protein YdhI	46	46	1	99	3031				236	236	236	2E151-R_06715	HBI01_03185	HBI05_23505	HBI04_08935	HBI02_08965	HBI03_18885	PS148-R_11075	PS15001_25720	PS15002_08015	PS16001_22495	PS16002_22040	PS16003_25855	PS16004_12870	PS16005_05445	PS184-R_00070	PS310-R_02655	PS378-R_17360	PS57-R_08365	RL316_22570	RL320_17160	RL97_25815	SA17021_07555	SA17022_19870	SA17023_18150	SA17024_10825	SA17101_21400	SB17032_20915	SB17033_16985	SB17034_05595	SB17035_12265	SB17036_25340	SB17037_08455	SB17038_08505	SB17039_15635	SB17040_15350	SB17042_11265
mug		G/U mismatch-specific DNA glycosylase	46	46	1	99	9202				506	506	506	2E151-R_01050	HBI01_06670	HBI05_22615	HBI04_24260	HBI02_10835	HBI03_15780	PS148-R_00990	PS15001_06500	PS15002_21535	PS16001_09610	PS16002_25440	PS16003_01660	PS16004_03345	PS16005_08165	PS184-R_03725	PS310-R_04085	PS378-R_00990	PS57-R_00990	RL316_25890	RL320_24515	RL97_16755	SA17021_10040	SA17022_05535	SA17023_05845	SA17024_08895	SA17101_10715	SB17032_05345	SB17033_23735	SB17034_06725	SB17035_23775	SB17036_09155	SB17037_16080	SB17038_02305	SB17039_12570	SB17040_09975	SB17042_06060
yheU		YheU family protein	46	46	1	99	6868				218	218	218	2E151-R_14310	HBI01_22660	HBI05_17565	HBI04_11145	HBI02_12230	HBI03_19315	PS148-R_13250	PS15001_11615	PS15002_22620	PS16001_13780	PS16002_18915	PS16003_13370	PS16004_14290	PS16005_06475	PS184-R_13875	PS310-R_14495	PS378-R_13710	PS57-R_13470	RL316_19620	RL320_13485	RL97_01075	SA17021_16335	SA17022_16240	SA17023_07780	SA17024_05765	SA17101_15040	SB17032_03950	SB17033_10945	SB17034_16525	SB17035_03395	SB17036_23980	SB17037_25440	SB17038_18705	SB17039_13390	SB17040_25660	SB17042_04955
entS		enterobactin exporter, iron-regulated	46	46	1	99	1494				1250	1250	1250	2E151-R_17675	HBI01_21380	HBI05_02360	HBI04_06860	HBI02_20140	HBI03_05985	PS148-R_17415	PS15001_08980	PS15002_10535	PS16001_16265	PS16002_05985	PS16003_13600	PS16004_15830	PS16005_15070	PS184-R_17260	PS310-R_19445	PS378-R_16940	PS57-R_16835	RL316_07570	RL320_21860	RL97_19655	SA17021_02395	SA17022_07420	SA17023_13405	SA17024_02000	SA17101_23205	SB17032_17990	SB17033_05855	SB17034_21540	SB17035_07780	SB17036_01990	SB17037_12360	SB17038_03820	SB17039_10245	SB17040_21170	SB17042_06600
ubiG		bifunctional 2-polyprenyl-6-hydroxyphenol methylase/3-demethylubiquinol 3-O-methyltransferase UbiG	46	46	1	99	10317				722	722	722	2E151-R_04755	HBI01_24905	HBI05_21555	HBI04_12465	HBI02_09600	HBI03_08260	PS148-R_03035	PS15001_14715	PS15002_03470	PS16001_03065	PS16002_11550	PS16003_06385	PS16004_02460	PS16005_18170	PS184-R_07415	PS310-R_07785	PS378-R_03035	PS57-R_04695	RL316_14965	RL320_13215	RL97_13585	SA17021_22680	SA17022_02405	SA17023_09600	SA17024_14495	SA17101_04105	SB17032_13745	SB17033_12130	SB17034_18740	SB17035_21565	SB17036_02805	SB17037_06550	SB17038_05905	SB17039_02960	SB17040_02055	SB17042_01800
dgt		dGTPase	46	46	1	99	8777				1517	1517	1517	2E151-R_11235	HBI01_24085	HBI05_01645	HBI04_17905	HBI02_03485	HBI03_17100	PS148-R_08225	PS15001_07490	PS15002_25775	PS16001_12430	PS16002_23070	PS16003_11900	PS16004_23110	PS16005_24810	PS184-R_10805	PS310-R_11105	PS378-R_09390	PS57-R_07175	RL316_06745	RL320_04810	RL97_04890	SA17021_21875	SA17022_26320	SA17023_11760	SA17024_21115	SA17101_13340	SB17032_27195	SB17033_00210	SB17034_00700	SB17035_14405	SB17036_11015	SB17037_10720	SB17038_17615	SB17039_19985	SB17040_23655	SB17042_02140
metB		cystathionine gamma-synthase	46	46	1	99	953				1160	1160	1160	2E151-R_20235	HBI01_25890	HBI05_18710	HBI04_19155	HBI02_13625	HBI03_05335	PS148-R_20495	PS15001_16085	PS15002_00670	PS16001_11085	PS16002_05295	PS16003_00480	PS16004_06465	PS16005_04015	PS184-R_20335	PS310-R_17275	PS378-R_20700	PS57-R_19880	RL316_03935	RL320_16015	RL97_12450	SA17021_16780	SA17022_11505	SA17023_07560	SA17024_14940	SA17101_22365	SB17032_09010	SB17033_06270	SB17034_24065	SB17035_09600	SB17036_07390	SB17037_09460	SB17038_04310	SB17039_00510	SB17040_08935	SB17042_20155
hxpB		hexitol phosphatase HxpB	46	46	1	99	9375				668	668	668	2E151-R_06015	HBI01_19410	HBI05_23050	HBI04_12640	HBI02_23670	HBI03_00385	PS148-R_10375	PS15001_25020	PS15002_07315	PS16001_21795	PS16002_21340	PS16003_25155	PS16004_26095	PS16005_19885	PS184-R_00770	PS310-R_01955	PS378-R_07655	PS57-R_09065	RL316_21870	RL320_00525	RL97_03955	SA17021_07855	SA17022_20570	SA17023_18855	SA17024_11525	SA17101_21845	SB17032_20450	SB17033_17690	SB17034_16805	SB17035_15010	SB17036_18895	SB17037_07735	SB17038_07800	SB17039_16335	SB17040_14640	SB17042_10810
yebV		Uncharacterized protein YebV	46	46	1	99	9499				236	236	236	2E151-R_10080	HBI01_00810	HBI05_15740	HBI04_03165	HBI02_22190	HBI03_01685	PS148-R_09850	PS15001_03930	PS15002_16610	PS16001_07015	PS16002_20805	PS16003_21675	PS16004_19355	PS16005_20560	PS184-R_01305	PS310-R_01420	PS378-R_07120	PS57-R_12575	RL316_12435	RL320_10570	RL97_10700	SA17021_08390	SA17022_21105	SA17023_19385	SA17024_12060	SA17101_00605	SB17032_19885	SB17033_15600	SB17034_04365	SB17035_03630	SB17036_22615	SB17037_07200	SB17038_19815	SB17039_16870	SB17040_14100	SB17042_13345
phnJ		alpha-D-ribose 1-methylphosphonate 5-phosphate C-P-lyase PhnJ	46	46	1	99	8212				845	845	845	2E151-R_20600	HBI01_21915	HBI05_19920	HBI04_19685	HBI02_01840	HBI03_23830	PS148-R_20840	PS15001_02170	PS15002_12055	PS16001_08670	PS16002_03320	PS16003_05125	PS16004_18080	PS16005_12835	PS184-R_20700	PS310-R_21915	PS378-R_21065	PS57-R_20640	RL316_23285	RL320_06130	RL97_22400	SA17021_11445	SA17022_04690	SA17023_01360	SA17024_02925	SA17101_08180	SB17032_16200	SB17033_08380	SB17034_01595	SB17035_15300	SB17036_08310	SB17037_14915	SB17038_09110	SB17039_07630	SB17040_05985	SB17042_23775
mdlB		SmdB family multidrug efflux ABC transporter permease/ATP-binding protein	46	46	1	99	1998				1781	1781	1781	2E151-R_12190	HBI01_14270	HBI05_12685	HBI04_08185	HBI02_26130	HBI03_02165	PS148-R_11910	PS15001_01530	PS15002_04345	PS16001_06740	PS16002_01935	PS16003_10545	PS16004_00485	PS16005_17110	PS184-R_11760	PS310-R_13160	PS378-R_11850	PS57-R_10305	RL316_00670	RL320_10980	RL97_13910	SA17021_04715	SA17022_23440	SA17023_10655	SA17024_07615	SA17101_14370	SB17032_12900	SB17033_09620	SB17034_08845	SB17035_08345	SB17036_06510	SB17037_23835	SB17038_25465	SB17039_11300	SB17040_00175	SB17042_14690
murF		UDP-N-acetylmuramoyl-tripeptide--D-alanyl-D-alanine ligase	46	46	1	99	8886				1358	1358	1358	2E151-R_10800	HBI01_16485	HBI05_11215	HBI04_20230	HBI02_07740	HBI03_14330	PS148-R_07790	PS15001_12505	PS15002_25340	PS16001_12865	PS16002_23495	PS16003_11465	PS16004_23545	PS16005_24375	PS184-R_10370	PS310-R_10670	PS378-R_09825	PS57-R_07610	RL316_06310	RL320_04375	RL97_18625	SA17021_21430	SA17022_25885	SA17023_23295	SA17024_21550	SA17101_12945	SB17032_27615	SB17033_00645	SB17034_00265	SB17035_13970	SB17036_11450	SB17037_01040	SB17038_17180	SB17039_19550	SB17040_23220	SB17042_02560
queG		tRNA epoxyqueuosine(34) reductase QueG	46	46	1	99	4162				1139	1139	1139	2E151-R_12430	HBI01_02650	HBI05_22025	HBI04_19305	HBI02_04690	HBI03_13545	PS148-R_13165	PS15001_17490	PS15002_05780	PS16001_20655	PS16002_04500	PS16003_22875	PS16004_09240	PS16005_15395	PS184-R_12000	PS310-R_14415	PS378-R_12605	PS57-R_10545	RL316_08755	RL320_02135	RL97_15680	SA17021_06260	SA17022_11110	SA17023_14020	SA17024_23555	SA17101_23865	SB17032_08110	SB17033_09315	SB17034_07995	SB17035_00260	SB17036_24385	SB17037_04435	SB17038_13650	SB17039_07220	SB17040_07240	SB17042_14050
yeiG		S-formylglutathione hydrolase	46	46	1	99	40				836	836	836	2E151-R_04340	HBI01_18320	HBI05_09915	HBI04_17165	HBI02_06190	HBI03_10960	PS148-R_02620	PS15001_15130	PS15002_03885	PS16001_02650	PS16002_15500	PS16003_05970	PS16004_02875	PS16005_14605	PS184-R_07830	PS310-R_07370	PS378-R_02620	PS57-R_05110	RL316_15380	RL320_12720	RL97_05810	SA17021_12945	SA17022_01990	SA17023_09180	SA17024_20040	SA17101_03725	SB17032_24285	SB17033_18875	SB17034_14375	SB17035_21980	SB17036_03220	SB17037_06965	SB17038_05490	SB17039_03375	SB17040_02470	SB17042_08190
eptB		kdo(2)-lipid A phosphoethanolamine 7''-transferase	46	46	1	99	7118				1691	1691	1691	2E151-R_07375	HBI01_20770	HBI05_16070	HBI04_06220	HBI02_16110	HBI03_19485	PS148-R_05835	PS15001_12735	PS15002_11465	PS16001_01270	PS16002_00435	PS16003_04325	PS16004_05595	PS16005_00165	PS184-R_09520	PS310-R_09825	PS378-R_09020	PS57-R_05700	RL316_02590	RL320_09905	RL97_23840	SA17021_15310	SA17022_17260	SA17023_14935	SA17024_04830	SA17101_13560	SB17032_19050	SB17033_01270	SB17034_02655	SB17035_05625	SB17036_00340	SB17037_20785	SB17038_22005	SB17039_02340	SB17040_04555	SB17042_03770
viaA		ATPase RavA stimulator ViaA	46	46	1	99	4669				1451	1451	1451	2E151-R_08590	HBI01_09980	HBI05_22270	HBI04_23330	HBI02_16995	HBI03_10335	PS148-R_07050	PS15001_11100	PS15002_15200	PS16001_00055	PS16002_01650	PS16003_24000	PS16004_09370	PS16005_01860	PS184-R_08305	PS310-R_08610	PS378-R_07805	PS57-R_06915	RL316_01470	RL320_07295	RL97_08040	SA17021_14100	SA17022_01260	SA17023_05125	SA17024_03615	SA17101_00870	SB17032_12695	SB17033_02485	SB17034_13315	SB17035_10265	SB17036_01555	SB17037_21995	SB17038_11565	SB17039_01125	SB17040_05770	SB17042_15680
yfcZ		DUF406 domain-containing protein	46	46	1	99	977				299	299	299	2E151-R_20320	HBI01_25975	HBI05_07705	HBI04_11565	HBI02_13720	HBI03_05420	PS148-R_20410	PS15001_16170	PS15002_00755	PS16001_11170	PS16002_05380	PS16003_00565	PS16004_06380	PS16005_03930	PS184-R_20420	PS310-R_17360	PS378-R_20785	PS57-R_19965	RL316_03850	RL320_15930	RL97_12365	SA17021_16865	SA17022_11590	SA17023_07475	SA17024_14855	SA17101_08925	SB17032_00345	SB17033_06185	SB17034_24150	SB17035_09685	SB17036_07305	SB17037_09375	SB17038_04395	SB17039_00425	SB17040_08850	SB17042_20050
ycbZ		Putative Lon protease-like protein	46	46	1	99	789				1760	1760	1760	2E151-R_03050	HBI01_01695	HBI05_14225	HBI04_25005	HBI02_15280	HBI03_21395	PS148-R_04810	PS15001_22835	PS15002_02035	PS16001_18270	PS16002_10510	PS16003_15260	PS16004_14430	PS16005_19030	PS184-R_05775	PS310-R_06080	PS378-R_04680	PS57-R_02900	RL316_16485	RL320_14510	RL97_06235	SA17021_00520	SA17022_09185	SA17023_01585	SA17024_16410	SA17101_02240	SB17032_21670	SB17033_03215	SB17034_19775	SB17035_04600	SB17036_10485	SB17037_03295	SB17038_13015	SB17039_23055	SB17040_19415	SB17042_15340
damX		cell division protein DamX	46	46	1	99	6902				1286	1286	1286	2E151-R_14165	HBI01_03625	HBI05_17710	HBI04_11290	HBI02_12375	HBI03_23215	PS148-R_13395	PS15001_03200	PS15002_22765	PS16001_13925	PS16002_18770	PS16003_13225	PS16004_14145	PS16005_06330	PS184-R_13730	PS310-R_14640	PS378-R_13855	PS57-R_13325	RL316_19765	RL320_13630	RL97_00240	SA17021_16190	SA17022_16385	SA17023_07925	SA17024_05620	SA17101_15210	SB17032_03820	SB17033_11090	SB17034_16670	SB17035_03250	SB17036_23835	SB17037_25295	SB17038_18560	SB17039_13535	SB17040_25515	SB17042_04825
ydjA		NAD(P)H nitroreductase	46	46	1	99	9417				551	551	551	2E151-R_05835	HBI01_19590	HBI05_23770	HBI04_12825	HBI02_21825	HBI03_00570	PS148-R_10195	PS15001_24840	PS15002_07135	PS16001_21615	PS16002_21160	PS16003_24975	PS16004_25915	PS16005_21640	PS184-R_00950	PS310-R_01775	PS378-R_07475	PS57-R_09245	RL316_21690	RL320_00345	RL97_03775	SA17021_08035	SA17022_20750	SA17023_19035	SA17024_11705	SA17101_22045	SB17032_20255	SB17033_25615	SB17034_04010	SB17035_08695	SB17036_19075	SB17037_07555	SB17038_20170	SB17039_16515	SB17040_14455	SB17042_10615
sdhC		succinate dehydrogenase cytochrome b556 subunit	46	46	1	99	9862				404	404	404	2E151-R_19955	HBI01_19970	HBI05_19305	HBI04_06080	HBI02_11330	HBI03_16145	PS148-R_20080	PS15001_08365	PS15002_09920	PS16001_16885	PS16002_09415	PS16003_09325	PS16004_21090	PS16005_11085	PS184-R_19940	PS310-R_21615	PS378-R_20420	PS57-R_19600	RL316_08185	RL320_22475	RL97_02375	SA17021_01780	SA17022_06630	SA17023_12790	SA17024_01385	SA17101_20200	SB17032_17390	SB17033_05240	SB17034_20925	SB17035_07165	SB17036_12935	SB17037_11745	SB17038_03205	SB17039_21905	SB17040_20565	SB17042_07200
btuD		vitamin B12 ABC transporter ATP-binding protein BtuD	46	46	1	99	9352				749	749	749	2E151-R_06360	HBI01_00095	HBI05_23145	HBI04_09450	HBI02_22420	HBI03_01570	PS148-R_10720	PS15001_25365	PS15002_07660	PS16001_22140	PS16002_21685	PS16003_25500	PS16004_09990	PS16005_20230	PS184-R_00425	PS310-R_02300	PS378-R_17715	PS57-R_08720	RL316_22215	RL320_17515	RL97_26170	SA17021_07200	SA17022_20225	SA17023_18505	SA17024_11180	SA17101_21755	SB17032_20545	SB17033_17345	SB17034_17150	SB17035_12625	SB17036_19575	SB17037_08095	SB17038_08145	SB17039_15995	SB17040_14990	SB17042_10905
rnb		exoribonuclease II	46	46	1	99	6207				1934	1934	1934	2E151-R_16990	HBI01_15160	HBI05_17020	HBI04_09265	HBI02_02595	HBI03_19910	PS148-R_16710	PS15001_04325	PS15002_18535	PS16001_25255	PS16002_16295	PS16003_17440	PS16004_02210	PS16005_05010	PS184-R_16555	PS310-R_18805	PS378-R_16300	PS57-R_16150	RL316_13150	RL320_19060	RL97_21295	SA17021_25240	SA17022_17985	SA17023_25060	SA17024_00360	SA17101_19230	SB17032_11880	SB17033_22305	SB17034_23470	SB17035_16935	SB17036_18060	SB17037_18545	SB17038_24420	SB17039_24790	SB17040_03510	SB17042_12090
pepD		cytosol nonspecific dipeptidase	46	46	1	99	3659				1457	1457	1457	2E151-R_22950	HBI01_19025	HBI05_18545	HBI04_10415	HBI02_09900	HBI03_03915	PS148-R_22895	PS15001_17435	PS15002_19500	PS16001_10735	PS16002_07290	PS16003_18905	PS16004_20950	PS16005_17945	PS184-R_23050	PS310-R_23275	PS378-R_23415	PS57-R_23005	RL316_04330	RL320_03485	RL97_20330	SA17021_23860	SA17022_22725	SA17023_21775	SA17024_06550	SA17101_15420	SB17032_05930	SB17033_22555	SB17034_06055	SB17035_23040	SB17036_00135	SB17037_11060	SB17038_11745	SB17039_05505	SB17040_26110	SB17042_23525
ruvX		Holliday junction resolvase RuvX	46	46	1	99	7506				416	416	416	2E151-R_24495	HBI01_07780	HBI05_24570	HBI04_03415	HBI02_21245	HBI03_03025	PS148-R_24235	PS15001_00670	PS15002_14610	PS16001_23715	PS16002_04140	PS16003_08750	PS16004_07600	PS16005_09280	PS184-R_24845	PS310-R_24465	PS378-R_24610	PS57-R_24520	RL316_19420	RL320_20315	RL97_24715	SA17021_12160	SA17022_12125	SA17023_04205	SA17024_23975	SA17101_07655	SB17032_10320	SB17033_14625	SB17034_16280	SB17035_18360	SB17036_05080	SB17037_13055	SB17038_09860	SB17039_04440	SB17040_10155	SB17042_23055
yicC		UPF0701 protein YicC	46	46	1	99	4812				863	863	863	2E151-R_07870	HBI01_04620	HBI05_08725	HBI04_19880	HBI02_04145	HBI03_07755	PS148-R_06330	PS15001_05640	PS15002_06305	PS16001_00775	PS16002_00930	PS16003_03830	PS16004_07795	PS16005_01140	PS184-R_09025	PS310-R_09330	PS378-R_08525	PS57-R_06195	RL316_03085	RL320_09410	RL97_08270	SA17021_14820	SA17022_00540	SA17023_04405	SA17024_04335	SA17101_01450	SB17032_18520	SB17033_01765	SB17034_02160	SB17035_06120	SB17036_00835	SB17037_21275	SB17038_21510	SB17039_01845	SB17040_05050	SB17042_19305
pgpA		phosphatidylglycerophosphatase A	46	46	1	99	1964				515	518	517	2E151-R_12025	HBI01_14105	HBI05_09035	HBI04_08020	HBI02_18165	HBI03_02000	PS148-R_11745	PS15001_01365	PS15002_04510	PS16001_06575	PS16002_02100	PS16003_10380	PS16004_00650	PS16005_16945	PS184-R_11595	PS310-R_12995	PS378-R_12015	PS57-R_10140	RL316_00835	RL320_11145	RL97_14075	SA17021_04880	SA17022_23275	SA17023_10820	SA17024_07450	SA17101_14190	SB17032_02950	SB17033_09785	SB17034_09010	SB17035_08510	SB17036_06675	SB17037_24000	SB17038_25630	SB17039_11465	SB17040_00010	SB17042_14860
aroC		chorismate synthase	46	46	1	99	554				1085	1085	1085	2E151-R_05240	HBI01_11020	HBI05_05530	HBI04_14780	HBI02_25910	HBI03_16840	PS148-R_03520	PS15001_14230	PS15002_02985	PS16001_03550	PS16002_12035	PS16003_06870	PS16004_01575	PS16005_14350	PS184-R_06930	PS310-R_08270	PS378-R_03520	PS57-R_04210	RL316_14480	RL320_08810	RL97_22190	SA17021_13450	SA17022_02890	SA17023_10085	SA17024_18065	SA17101_04560	SB17032_14260	SB17033_06635	SB17034_12555	SB17035_21080	SB17036_15110	SB17037_06065	SB17038_06390	SB17039_09890	SB17040_01570	SB17042_01290
nudJ		phosphatase NudJ	46	46	1	99	3675				461	461	461	2E151-R_03895	HBI01_23370	HBI05_15065	HBI04_20950	HBI02_24850	HBI03_22895	PS148-R_05655	PS15001_21990	PS15002_01190	PS16001_12125	PS16002_09665	PS16003_15775	PS16004_17640	PS16005_25495	PS184-R_06620	PS310-R_06925	PS378-R_03835	PS57-R_02055	RL316_24050	RL320_22775	RL97_07080	SA17021_13720	SA17022_08340	SA17023_02430	SA17024_17260	SA17101_03095	SB17032_04690	SB17033_12415	SB17034_18930	SB17035_05445	SB17036_17810	SB17037_10010	SB17038_12170	SB17039_03950	SB17040_11740	SB17042_10000
yqhH		lipoprotein YqhH	46	46	1	99	9274				257	257	257	2E151-R_00710	HBI01_17360	HBI05_04525	HBI04_23125	HBI02_15990	HBI03_05675	PS148-R_01330	PS15001_09650	PS15002_21195	PS16001_09265	PS16002_25100	PS16003_01320	PS16004_04570	PS16005_07820	PS184-R_04065	PS310-R_03745	PS378-R_01330	PS57-R_01330	RL316_25550	RL320_24855	RL97_23440	SA17021_10380	SA17022_05195	SA17023_05505	SA17024_08555	SA17101_10455	SB17032_05100	SB17033_24075	SB17034_07065	SB17035_02245	SB17036_08815	SB17037_01480	SB17038_00980	SB17039_00730	SB17040_09635	SB17042_06305
fliR		flagellar biosynthetic protein FliR	46	46	1	99	9633				785	785	785	2E151-R_09490	HBI01_01400	HBI05_08275	HBI04_07560	HBI02_19195	HBI03_16075	PS148-R_09260	PS15001_03340	PS15002_16020	PS16001_07605	PS16002_16780	PS16003_21210	PS16004_16095	PS16005_21150	PS184-R_01895	PS310-R_00830	PS378-R_06530	PS57-R_11985	RL316_11845	RL320_08345	RL97_01960	SA17021_08980	SA17022_21695	SA17023_19975	SA17024_12650	SA17101_16930	SB17032_23675	SB17033_18070	SB17034_04955	SB17035_04220	SB17036_20240	SB17037_02040	SB17038_19225	SB17039_17460	SB17040_13510	SB17042_25405
fadB		fatty acid oxidation complex subunit alpha FadB	46	46	1	99	4346				2189	2189	2189	2E151-R_18050	HBI01_22915	HBI05_20495	HBI04_00835	HBI02_20050	HBI03_13710	PS148-R_18415	PS15001_24265	PS15002_23620	PS16001_24665	PS16002_24205	PS16003_26540	PS16004_22015	PS16005_26045	PS184-R_18260	PS310-R_20345	PS378-R_19160	PS57-R_17860	RL316_08480	RL320_08985	RL97_11470	SA17021_26415	SA17022_13685	SA17023_22805	SA17024_13300	SA17101_09765	SB17032_00390	SB17033_20175	SB17034_22430	SB17035_25670	SB17036_16585	SB17037_22975	SB17038_15270	SB17039_14465	SB17040_12135	SB17042_17230
ubiX		flavin prenyltransferase UbiX	46	46	1	99	10224				569	569	569	2E151-R_05145	HBI01_10925	HBI05_05440	HBI04_14675	HBI02_25820	HBI03_07230	PS148-R_03425	PS15001_14325	PS15002_03080	PS16001_03455	PS16002_11940	PS16003_06775	PS16004_01670	PS16005_14255	PS184-R_07025	PS310-R_08175	PS378-R_03425	PS57-R_04305	RL316_14575	RL320_08715	RL97_22095	SA17021_13355	SA17022_02795	SA17023_09990	SA17024_17970	SA17101_04470	SB17032_14155	SB17033_06730	SB17034_12650	SB17035_21175	SB17036_15205	SB17037_06160	SB17038_06295	SB17039_02570	SB17040_01665	SB17042_01395
nudE		ADP compounds hydrolase NudE	46	46	1	99	6912				560	560	560	2E151-R_14120	HBI01_03670	HBI05_17755	HBI04_11335	HBI02_12420	HBI03_23260	PS148-R_13440	PS15001_03155	PS15002_22810	PS16001_13970	PS16002_18725	PS16003_13180	PS16004_14100	PS16005_06285	PS184-R_13685	PS310-R_14685	PS378-R_13900	PS57-R_13280	RL316_19810	RL320_13675	RL97_00285	SA17021_16145	SA17022_16430	SA17023_07970	SA17024_05575	SA17101_15255	SB17032_03775	SB17033_11135	SB17034_16715	SB17035_03205	SB17036_23790	SB17037_25250	SB17038_18515	SB17039_13580	SB17040_25470	SB17042_04780
yciN		Protein YciN	46	46	1	99	6137				251	251	251	2E151-R_16900	HBI01_15250	HBI05_17110	HBI04_00650	HBI02_02685	HBI03_15085	PS148-R_16620	PS15001_04415	PS15002_18625	PS16001_25345	PS16002_16205	PS16003_23905	PS16004_02300	PS16005_04920	PS184-R_16465	PS310-R_18895	PS378-R_16390	PS57-R_16060	RL316_13240	RL320_19150	RL97_21385	SA17021_25150	SA17022_18075	SA17023_25150	SA17024_00450	SA17101_19320	SB17032_11970	SB17033_22395	SB17034_13260	SB17035_16845	SB17036_17970	SB17037_18635	SB17038_24330	SB17039_24880	SB17040_03600	SB17042_12180
yqeF		putative acetyl-CoA acetyltransferase	46	46	1	99	7676				1181	1181	1181	2E151-R_15595	HBI01_15765	HBI05_21110	HBI04_21460	HBI02_00525	HBI03_19690	PS148-R_15315	PS15001_00210	PS15002_14150	PS16001_24170	PS16002_03685	PS16003_08290	PS16004_07145	PS16005_09740	PS184-R_15265	PS310-R_16710	PS378-R_14865	PS57-R_14860	RL316_18960	RL320_20775	RL97_05250	SA17021_20350	SA17022_12585	SA17023_03745	SA17024_24430	SA17101_07030	SB17032_01210	SB17033_14165	SB17034_15820	SB17035_18820	SB17036_05540	SB17037_12595	SB17038_10320	SB17039_05855	SB17040_10610	SB17042_12675
dgcM		diguanylate cyclase DgcM	46	46	1	99	3784				1232	1232	1232	2E151-R_17250	HBI01_14900	HBI05_16795	HBI04_08585	HBI02_11490	HBI03_23915	PS148-R_16970	PS15001_04065	PS15002_18275	PS16001_24995	PS16002_20155	PS16003_23755	PS16004_13850	PS16005_25245	PS184-R_16815	PS310-R_18545	PS378-R_16040	PS57-R_16410	RL316_12890	RL320_18800	RL97_21035	SA17021_25500	SA17022_17725	SA17023_24800	SA17024_00100	SA17101_18945	SB17032_11575	SB17033_22040	SB17034_23210	SB17035_17200	SB17036_14060	SB17037_18285	SB17038_24680	SB17039_24530	SB17040_03250	SB17042_11780
ecpD		polymerized tip adhesin of ECP fibers	46	46	1	99	1804				1643	1643	1643	2E151-R_11465	HBI01_13490	HBI05_10430	HBI04_09550	HBI02_20360	HBI03_12415	PS148-R_11185	PS15001_00805	PS15002_05070	PS16001_06015	PS16002_02660	PS16003_09820	PS16004_11725	PS16005_11915	PS184-R_11035	PS310-R_12435	PS378-R_12575	PS57-R_09580	RL316_01395	RL320_11705	RL97_00975	SA17021_05440	SA17022_15290	SA17023_17265	SA17024_13255	SA17101_14720	SB17032_05820	SB17033_09045	SB17034_09570	SB17035_00900	SB17036_07650	SB17037_24560	SB17038_26190	SB17039_12025	SB17040_17985	SB17042_23415
purH		bifunctional phosphoribosylaminoimidazolecarboxamide formyltransferase/IMP cyclohydrolase	46	46	1	99	6748				1589	1589	1589	2E151-R_25030	HBI01_15425	HBI05_13955	HBI04_15235	HBI02_14810	HBI03_14040	PS148-R_24770	PS15001_11875	PS15002_11640	PS16001_13560	PS16002_12610	PS16003_13930	PS16004_21990	PS16005_23025	PS184-R_25040	PS310-R_24865	PS378-R_25010	PS57-R_24995	RL316_16205	RL320_18030	RL97_10430	SA17021_16595	SA17022_15855	SA17023_24495	SA17024_15580	SA17101_16285	SB17032_10840	SB17033_19815	SB17034_17330	SB17035_12985	SB17036_17335	SB17037_15880	SB17038_20270	SB17039_13170	SB17040_16160	SB17042_23895
Acyl carrier protein		Acyl carrier protein	46	46	1	99	8420				248	248	248	2E151-R_00530	HBI01_17540	HBI05_04340	HBI04_25950	HBI02_16635	HBI03_09495	PS148-R_01510	PS15001_09470	PS15002_21015	PS16001_09085	PS16002_24920	PS16003_01140	PS16004_04750	PS16005_07640	PS184-R_04245	PS310-R_03565	PS378-R_01510	PS57-R_01510	RL316_25370	RL320_25035	RL97_23620	SA17021_10560	SA17022_05015	SA17023_05325	SA17024_08375	SA17101_18385	SB17032_04920	SB17033_24255	SB17034_07245	SB17035_02065	SB17036_08635	SB17037_01660	SB17038_01160	SB17039_00910	SB17040_09455	SB17042_06485
mfd		transcription-repair coupling factor	46	46	1	99	2739				3494	3518	3494	2E151-R_03795	HBI01_23470	HBI05_14960	HBI04_20850	HBI02_25320	HBI03_17350	PS148-R_05555	PS15001_22090	PS15002_01290	PS16001_12025	PS16002_09765	PS16003_15875	PS16004_17540	PS16005_21455	PS184-R_06520	PS310-R_06825	PS378-R_03935	PS57-R_02155	RL316_24150	RL320_22875	RL97_06980	SA17021_13820	SA17022_08440	SA17023_02330	SA17024_17160	SA17101_02995	SB17032_04600	SB17033_12315	SB17034_19030	SB17035_05345	SB17036_17710	SB17037_10110	SB17038_12270	SB17039_04050	SB17040_11640	SB17042_09910
speD		adenosylmethionine decarboxylase	46	46	1	99	8850				794	794	794	2E151-R_11000	HBI01_16285	HBI05_11030	HBI04_18115	HBI02_07555	HBI03_08725	PS148-R_07990	PS15001_12305	PS15002_25540	PS16001_12665	PS16002_23295	PS16003_11665	PS16004_23345	PS16005_24575	PS184-R_10570	PS310-R_10870	PS378-R_09625	PS57-R_07410	RL316_06510	RL320_04575	RL97_24245	SA17021_21635	SA17022_26085	SA17023_12230	SA17024_21350	SA17101_13130	SB17032_27410	SB17033_00445	SB17034_00465	SB17035_14170	SB17036_11250	SB17037_10485	SB17038_17380	SB17039_19750	SB17040_23420	SB17042_02355
eutH		ethanolamine utilization protein EutH	46	46	1	99	429				1226	1226	1226	2E151-R_24120	HBI01_25540	HBI05_01315	HBI04_16830	HBI02_08340	HBI03_23715	PS148-R_23610	PS15001_13745	PS15002_08455	PS16001_04035	PS16002_06695	PS16003_07360	PS16004_01250	PS16005_10220	PS184-R_24230	PS310-R_11500	PS378-R_10700	PS57-R_23595	RL316_10120	RL320_26495	RL97_13275	SA17021_04045	SA17022_03375	SA17023_10570	SA17024_18550	SA17101_05130	SB17032_15005	SB17033_21520	SB17034_12065	SB17035_20590	SB17036_14625	SB17037_05575	SB17038_06875	SB17039_09405	SB17040_01085	SB17042_00780
group_10703	yeaQ	Uncharacterized membrane protein YeaQ/YmgE, transglycosylase-associated protein family	46	46	1	99	6016				254	254	254	2E151-R_18920	HBI01_08480	HBI05_25055	HBI04_24840	HBI02_07250	HBI03_22310	PS148-R_18165	PS15001_04870	PS15002_19080	PS16001_25800	PS16002_08515	PS16003_16765	PS16004_00120	PS16005_04465	PS184-R_18010	PS310-R_15580	PS378-R_18195	PS57-R_17610	RL316_13695	RL320_25640	RL97_21840	SA17021_24695	SA17022_18530	SA17023_02625	SA17024_20690	SA17101_19720	SB17032_12355	SB17033_07350	SB17034_12945	SB17035_16390	SB17036_09580	SB17037_19090	SB17038_00350	SB17039_25335	SB17040_04055	SB17042_10210
prmC		peptide chain release factor N(5)-glutamine methyltransferase	46	46	1	99	6066				833	833	833	2E151-R_19025	HBI01_08375	HBI05_25170	HBI04_25445	HBI02_07365	HBI03_17940	PS148-R_18270	PS15001_04765	PS15002_18975	PS16001_25695	PS16002_08620	PS16003_16870	PS16004_00015	PS16005_04570	PS184-R_18115	PS310-R_15475	PS378-R_18090	PS57-R_17715	RL316_13590	RL320_25535	RL97_21735	SA17021_24800	SA17022_18425	SA17023_02730	SA17024_20585	SA17101_19635	SB17032_12470	SB17033_07245	SB17034_10975	SB17035_16495	SB17036_09685	SB17037_18985	SB17038_00455	SB17039_25230	SB17040_03950	SB17042_10325
hupB		DNA-binding protein HU-beta	46	46	1	99	1988				272	272	272	2E151-R_12145	HBI01_14225	HBI05_12640	HBI04_08140	HBI02_26085	HBI03_02120	PS148-R_11865	PS15001_01485	PS15002_04390	PS16001_06695	PS16002_01980	PS16003_10500	PS16004_00530	PS16005_17065	PS184-R_11715	PS310-R_13115	PS378-R_11895	PS57-R_10260	RL316_00715	RL320_11025	RL97_13955	SA17021_04760	SA17022_23395	SA17023_10700	SA17024_07570	SA17101_14325	SB17032_12945	SB17033_09665	SB17034_08890	SB17035_08390	SB17036_06555	SB17037_23880	SB17038_25510	SB17039_11345	SB17040_00130	SB17042_14735
gndA		NADP-dependent phosphogluconate dehydrogenase	46	46	1	99	9812				1406	1406	1406	2E151-R_08675	HBI01_05595	HBI05_11625	HBI04_07110	HBI02_01360	HBI03_01235	PS148-R_08445	PS15001_19875	PS15002_10875	PS16001_17385	PS16002_14110	PS16003_16085	PS16004_08300	PS16005_13495	PS184-R_02705	PS310-R_00015	PS378-R_05715	PS57-R_20095	RL316_04585	RL320_06855	RL97_24965	SA17021_03330	SA17022_22510	SA17023_15795	SA17024_26430	SA17101_17335	SB17032_28980	SB17033_14770	SB17034_10680	SB17035_18160	SB17036_02515	SB17037_26140	SB17038_22920	SB17039_23795	SB17040_12695	SB17042_08885
ldtD		L,D-transpeptidase	46	46	1	99	821				1847	1847	1847	2E151-R_02935	HBI01_01580	HBI05_04940	HBI04_00180	HBI02_18955	HBI03_21280	PS148-R_04695	PS15001_22950	PS15002_02150	PS16001_05225	PS16002_10625	PS16003_15145	PS16004_14545	PS16005_19145	PS184-R_05660	PS310-R_05965	PS378-R_04795	PS57-R_03015	RL316_16600	RL320_14625	RL97_06120	SA17021_00635	SA17022_09300	SA17023_16365	SA17024_16295	SA17101_02080	SB17032_21510	SB17033_03330	SB17034_19890	SB17035_04485	SB17036_10600	SB17037_03410	SB17038_13130	SB17039_22940	SB17040_19530	SB17042_15505
fimF		FimF protein precursor	46	46	1	99	8558				530	530	530	2E151-R_13140	HBI01_11185	HBI05_24355	HBI04_00920	HBI02_04405	HBI03_00040	PS148-R_12455	PS15001_07705	PS15002_24105	PS16001_19945	PS16002_19185	PS16003_22165	PS16004_12115	PS16005_16170	PS184-R_12710	PS310-R_13705	PS378-R_13315	PS57-R_11255	RL316_05170	RL320_16610	RL97_01850	SA17021_24025	SA17022_24580	SA17023_16440	SA17024_22845	SA17101_24830	SB17032_28510	SB17033_03595	SB17034_02845	SB17035_01870	SB17036_12750	SB17037_13435	SB17038_15875	SB17039_18255	SB17040_21915	SB17042_03515
pdeH		cyclic-guanylate-specific phosphodiesterase	46	46	1	99	7089				767	767	767	2E151-R_07250	HBI01_11140	HBI05_01385	HBI04_03500	HBI02_24170	HBI03_01040	PS148-R_05710	PS15001_12860	PS15002_11340	PS16001_01395	PS16002_00310	PS16003_04450	PS16004_05720	PS16005_00040	PS184-R_09645	PS310-R_09950	PS378-R_09145	PS57-R_05575	RL316_02465	RL320_10030	RL97_23715	SA17021_15435	SA17022_17135	SA17023_14810	SA17024_14745	SA17101_26155	SB17032_19195	SB17033_01145	SB17034_17555	SB17035_05500	SB17036_13915	SB17037_20660	SB17038_22130	SB17039_02465	SB17040_04430	SB17042_03915
arcC		carbamate kinase	46	46	1	99	2091				893	893	893	2E151-R_24615	HBI01_12340	HBI05_12270	HBI04_21905	HBI02_13320	HBI03_03435	PS148-R_24495	PS15001_18210	PS15002_14875	PS16001_15905	PS16002_06855	PS16003_15625	PS16004_16685	PS16005_22130	PS184-R_24085	PS310-R_24855	PS378-R_24730	PS57-R_24580	RL316_20980	RL320_01600	RL97_19440	SA17021_23225	SA17022_23815	SA17023_20170	SA17024_18965	SA17101_09900	SB17032_26255	SB17033_12495	SB17034_13875	SB17035_14825	SB17036_18505	SB17037_25660	SB17038_25090	SB17039_25595	SB17040_25840	SB17042_18315
pyrD		quinone-dependent dihydroorotate dehydrogenase	46	46	1	99	799				1010	1010	1010	2E151-R_03000	HBI01_01645	HBI05_14175	HBI04_24955	HBI02_15230	HBI03_21345	PS148-R_04760	PS15001_22885	PS15002_02085	PS16001_18320	PS16002_10560	PS16003_15210	PS16004_14480	PS16005_19080	PS184-R_05725	PS310-R_06030	PS378-R_04730	PS57-R_02950	RL316_16535	RL320_14560	RL97_06185	SA17021_00570	SA17022_09235	SA17023_01535	SA17024_16360	SA17101_02190	SB17032_21620	SB17033_03265	SB17034_19825	SB17035_04550	SB17036_10535	SB17037_03345	SB17038_13065	SB17039_23005	SB17040_19465	SB17042_15390
fliQ		flagellar biosynthesis protein FliQ	46	46	1	99	9632				269	269	269	2E151-R_09495	HBI01_01395	HBI05_08280	HBI04_07555	HBI02_19190	HBI03_16070	PS148-R_09265	PS15001_03345	PS15002_16025	PS16001_07600	PS16002_16775	PS16003_21205	PS16004_16100	PS16005_21145	PS184-R_01890	PS310-R_00835	PS378-R_06535	PS57-R_11990	RL316_11850	RL320_08350	RL97_01965	SA17021_08975	SA17022_21690	SA17023_19970	SA17024_12645	SA17101_16925	SB17032_23680	SB17033_18065	SB17034_04950	SB17035_04215	SB17036_20245	SB17037_02045	SB17038_19230	SB17039_17455	SB17040_13515	SB17042_25400
dnaQ		DNA polymerase III subunit epsilon	46	46	1	99	3616				740	740	740	2E151-R_24845	HBI01_20615	HBI05_01490	HBI04_15285	HBI02_14755	HBI03_03820	PS148-R_24395	PS15001_16830	PS15002_12180	PS16001_24850	PS16002_12185	PS16003_14120	PS16004_24535	PS16005_12150	PS184-R_24945	PS310-R_24625	PS378-R_24960	PS57-R_24765	RL316_20640	RL320_18190	RL97_02530	SA17021_01465	SA17022_12990	SA17023_17365	SA17024_00575	SA17101_16335	SB17032_25765	SB17033_16310	SB17034_07500	SB17035_09390	SB17036_15640	SB17037_09720	SB17038_07650	SB17039_20395	SB17040_18060	SB17042_26425
cueO		multicopper oxidase CueO	46	46	1	99	8847				1550	1550	1550	2E151-R_11015	HBI01_16270	HBI05_11015	HBI04_18100	HBI02_07540	HBI03_08710	PS148-R_08005	PS15001_12290	PS15002_25555	PS16001_12650	PS16002_23280	PS16003_11680	PS16004_23330	PS16005_24590	PS184-R_10585	PS310-R_10885	PS378-R_09610	PS57-R_07395	RL316_06525	RL320_04590	RL97_24230	SA17021_21650	SA17022_26100	SA17023_12245	SA17024_21335	SA17101_13145	SB17032_27395	SB17033_00430	SB17034_00480	SB17035_14185	SB17036_11235	SB17037_10500	SB17038_17395	SB17039_19765	SB17040_23435	SB17042_02340
fetA		iron ABC transporter ATP-binding protein FetA	46	46	1	99	2054				677	677	677	2E151-R_12415	HBI01_14495	HBI05_15185	HBI04_03885	HBI02_12565	HBI03_22775	PS148-R_12135	PS15001_01755	PS15002_04120	PS16001_06965	PS16002_01710	PS16003_10770	PS16004_00260	PS16005_17340	PS184-R_11985	PS310-R_13385	PS378-R_11625	PS57-R_10530	RL316_00445	RL320_10755	RL97_13685	SA17021_04490	SA17022_23665	SA17023_12175	SA17024_07840	SA17101_14585	SB17032_07280	SB17033_09395	SB17034_08620	SB17035_08120	SB17036_06285	SB17037_23610	SB17038_25240	SB17039_11075	SB17040_00400	SB17042_18180
cnoX		chaperedoxin	46	46	1	99	2057				854	854	854	2E151-R_24745	HBI01_12470	HBI05_15195	HBI04_03875	HBI02_12575	HBI03_22790	PS148-R_24625	PS15001_18080	PS15002_14745	PS16001_16035	PS16002_06730	PS16003_15755	PS16004_16810	PS16005_22255	PS184-R_24215	PS310-R_24725	PS378-R_24860	PS57-R_24710	RL316_20850	RL320_01470	RL97_19305	SA17021_23095	SA17022_23685	SA17023_20040	SA17024_18835	SA17101_14595	SB17032_07290	SB17033_12625	SB17034_14005	SB17035_11760	SB17036_18140	SB17037_25530	SB17038_25220	SB17039_25465	SB17040_25970	SB17042_18190
[truncated: 10,381 more rows]
[truncated: 10 more columns]
