# Supplementary material for: Comparison of IncK-blaCMY-2 Plasmids in Extended-Spectrum Cephalosporin-Resistant Escherichia coli Isolated from Poultry and Humans in Denmark, Finland, and Germany
Source: Antibiotics (Basel). 2024 Apr 10;13(4):349. doi: 10.3390/antibiotics13040349 (PMC11047599; doi:10.3390/antibiotics13040349)
Supplement: Supplementary file 1 [file antibiotics-13-00349-s001.zip › Table S3. SNP matrix of ST429 and ST1286.xlsx]

## Sheet: snp_matrix_ST429
	2E151-R	PS148-R	PS15002	PS16001	PS16002	PS16003	PS16004	PS16005	PS184-R	PS310-R	PS378-R	PS57-R	PS15001	RL316	RL320	RL97	SA17021	SA17022	SA17023	SA17024	SB17033	SB17034	SB17035	SB17036	SB17037	SB17038	SB17039	SB17040	SB17121	SB17122	SB17123	Y13-R
2E151-R	0	1	22	29	29	26	31	32	3	1	1	2	17	43	50	52	31	22	37	9	26	26	29	20	19	19	22	21	26	22	22	1
PS148-R	1	0	23	30	30	25	32	31	4	2	0	3	18	44	51	53	32	23	38	10	27	27	28	21	20	20	23	22	27	23	23	0
PS15002	22	23	0	23	21	18	25	26	25	23	23	24	9	37	46	44	23	18	31	25	26	28	29	26	25	25	28	27	28	28	28	23
PS16001	29	30	23	0	20	19	20	15	32	30	30	31	20	42	51	53	24	25	32	32	31	33	38	33	32	32	33	34	35	35	35	30
PS16002	29	30	21	20	0	9	8	17	32	30	30	31	20	40	49	55	26	25	32	32	35	33	34	33	32	32	33	34	35	35	35	30
PS16003	26	25	18	19	9	0	13	12	29	27	25	28	17	41	48	52	27	22	31	29	32	30	31	30	29	29	30	31	30	32	32	25
PS16004	31	32	25	20	8	13	0	15	34	32	32	33	22	44	51	59	30	27	34	34	37	37	38	35	34	34	35	36	35	37	37	32
PS16005	32	31	26	15	17	12	15	0	35	33	31	34	23	45	52	56	27	28	37	35	34	34	35	36	35	35	36	37	34	38	38	31
PS184-R	3	4	25	32	32	29	34	35	0	4	4	5	20	46	53	55	34	25	40	12	29	29	32	23	22	22	25	24	29	25	25	4
PS310-R	0	2	23	30	30	27	32	33	4	0	2	3	18	44	51	53	32	23	38	10	27	27	30	21	20	20	23	22	27	23	23	2
PS378-R	1	0	23	30	30	25	32	31	4	2	0	3	18	44	51	53	32	23	38	10	27	27	28	21	20	20	23	22	27	23	23	0
PS57-R	2	3	24	31	31	28	33	34	5	3	3	0	19	45	52	54	33	24	39	11	28	28	31	22	21	21	24	23	28	24	24	3
PS15001	17	18	9	20	20	17	22	23	20	18	18	19	0	36	43	45	22	13	30	20	27	27	30	21	20	20	23	22	27	23	23	18
RL316	43	44	37	42	40	41	44	45	46	44	44	45	36	0	17	43	40	41	42	46	47	51	48	47	46	46	49	48	47	49	49	44
RL320	50	51	46	51	49	48	51	52	53	51	51	52	43	17	0	52	49	48	51	53	54	60	57	54	53	53	56	55	54	56	56	51
RL97	52	53	44	53	55	52	59	56	55	53	53	54	45	43	52	0	55	50	55	55	54	58	57	56	55	55	58	57	56	58	58	53
SA17021	31	32	23	24	26	27	30	27	34	32	32	33	22	40	49	55	0	9	38	34	33	35	38	35	34	34	35	36	37	37	37	32
SA17022	22	23	18	25	25	22	27	28	25	23	23	24	13	41	48	50	9	0	35	25	32	32	35	26	25	25	28	27	32	28	28	23
SA17023	37	38	31	32	32	31	34	37	40	38	38	39	30	42	51	55	38	35	0	40	43	43	46	41	40	40	41	42	45	43	43	38
SA17024	9	10	25	32	32	29	34	35	12	10	10	11	20	46	53	55	34	25	40	0	29	29	32	23	22	22	25	24	29	25	25	10
SB17033	26	27	26	31	35	32	37	34	29	27	27	28	27	47	54	54	33	32	43	29	0	8	9	8	7	7	12	13	6	14	14	27
SB17034	26	27	28	33	33	30	37	34	29	27	27	28	27	51	60	58	35	32	43	29	8	0	11	8	7	7	12	13	10	14	14	27
SB17035	29	28	29	38	34	31	38	35	32	30	28	31	30	48	57	57	38	35	46	32	9	11	0	11	10	10	17	16	7	17	17	28
SB17036	20	21	26	33	33	30	35	36	23	21	21	22	21	47	54	56	35	26	41	23	8	8	11	0	1	1	8	7	8	8	8	21
SB17037	19	20	25	32	32	29	34	35	22	20	20	21	20	46	53	55	34	25	40	22	7	7	10	1	0	0	7	6	7	7	7	20
SB17038	19	20	25	32	32	29	34	35	22	20	20	21	20	46	53	55	34	25	40	22	7	7	10	1	0	0	7	6	7	7	7	20
SB17039	22	23	28	33	33	30	35	36	25	23	23	24	23	49	56	58	35	28	41	25	12	12	17	8	7	7	0	1	14	2	2	23
SB17040	21	22	27	34	34	31	36	37	24	22	22	23	22	48	55	57	36	27	42	24	13	13	16	7	6	6	1	0	13	1	1	22
SB17121	26	27	28	35	35	30	35	34	29	27	27	28	27	47	54	56	37	32	45	29	6	10	7	8	7	7	14	13	0	14	14	27
SB17122	22	23	28	35	35	32	37	38	25	23	23	24	23	49	56	58	37	28	43	25	14	14	17	8	7	7	2	1	14	0	2	23
SB17123	22	23	28	35	35	32	37	38	25	23	23	24	23	49	56	58	37	28	43	25	14	14	17	8	7	7	2	1	14	2	0	23
Y13-R	1	0	23	30	30	25	32	31	4	2	0	3	18	44	51	53	32	23	38	10	27	27	28	21	20	20	23	22	27	23	23	0
1).The same date of isolates were marked in the same color.
2). The reference isolate PS15001 is marked with red color.
3). Poultry isolates from Finland and Germany, and 1 human isolate from Denmark were shown in black bold.

## Sheet: snp_matrix_ST1286
	SB18002	SB18001	SB18003	SB17103	SB18102	SB18004
SB18002	0
SB18001	68
SB18003	34	85	0
SB17103	17	77	34	0
SB18102	16	68	33	13	0
SB18004	34	90	43	31	22	0
1).The same date of isolates were marked in the same color. 2). The reference isolate SB17103 is marked in red.
