# Supplementary material for: Comparison of IncK-blaCMY-2 Plasmids in Extended-Spectrum Cephalosporin-Resistant Escherichia coli Isolated from Poultry and Humans in Denmark, Finland, and Germany
Source: Antibiotics (Basel). 2024 Apr 10;13(4):349. doi: 10.3390/antibiotics13040349 (PMC11047599; doi:10.3390/antibiotics13040349)
Supplement: Supplementary file 1 [file antibiotics-13-00349-s001.zip › Table S4. ST429 in EnteroBase with spanning trees.xlsx]

## Sheet: Contents
	Supplementary data
	Table S4. E. coli ST429 collection metadata in the Enterobase Strains
	The ID of Enterobase strains is based on the name of Assembly barcode of downloaded fasts files. Different color represents different countries.

## Sheet: Sup Table ST429 Enterobase
Enterobase ID		Strain name	Accession no.	Source	Year	Country	Project ID	Sample ID	Collection date
ESC_CB9431AA		EC_9503_1L1_D	SRR22784693	Aquatic Animal	2021	Canada	PRJNA912639	SAMN32247505	2022-12-19
ESC_CB9475AA		EC_9503_1S2_D	SRR22896370	Aquatic Animal	2021	Canada	PRJNA912639	SAMN32247303	2022-12-19
ESC_CB9627AA		EC_9503_1H3_D	SRR22896403	Aquatic Animal	2021	Canada	PRJNA912639	SAMN32247493	2022-12-19
ESC_CB9561AA		EC_9503_2H1_D	SRR22896576	Aquatic Animal	2021	Canada	PRJNA912639	SAMN32247318	2022-12-19
ESC_CB9605AA		EC_9503_2L2_D	SRR22896385	Aquatic Animal	2021	Canada	PRJNA912639	SAMN32247296	2022-12-19
ESC_AB9403AA		UCBerkY18	SRR21143354	Companion Animal	2021	Ecuador	PRJNA861272	SAMN30416439	2022-08-20
ESC_FA4945AA		1604987-ESBL	Uploaded Reads	Food	2016	Luxembourg	NA	NA	2016-12-13
ESC_FA4950AA		1605145-ESBL	Uploaded Reads	Food	2016	Luxembourg	NA	NA	2016-12-13
ESC_OA5679AA		484	SRR10310380	Human	2016	Brazil	PRJNA578368	SAMN13058771	2019-10-20
ESC_CB1115AA		ARDIG91	SRR21990313	Human	2021	France	PRJNA805266	SAMN25849768	2022-10-23
ESC_RA5270AA		ampC_0040	SRR11871286	Human	2016	Netherlands	PRJNA592140	SAMN15052524	2020-05-29
ESC_RA5245AA		ampC_0062	SRR11871261	Human	2017	Netherlands	PRJNA592140	SAMN15052546	2020-05-29
ESC_CB0899AA		165-2016-22-665	SRR21990096	Human	2021	Norway	PRJNA805266	SAMN25849822	2022-10-23
ESC_CB0917AA		11-2016-22-363	SRR21990114	Human	2021	Norway	PRJNA805266	SAMN25849808	2022-10-23
ESC_BB6735AA		824342	SRR21849167	Human	2020	United States	PRJNA809394	SAMN26304534	2022-10-13
ESC_BB8176AA		756241	SRR21839963	Human	2020	United States	PRJNA809394	SAMN26304533	2022-10-13
ESC_AB6676AA		J051	ERR8651161	Poultry	2011	Canada	PRJEB50837	SAMEA12943788	2022-08-07
ESC_AB6661AA		J066	ERR8651176	Poultry	2012	Canada	PRJEB50837	SAMEA12943803	2022-08-07
ESC_AB6656AA		J071	ERR8651181	Poultry	2012	Canada	PRJEB50837	SAMEA12943808	2022-08-07
ESC_AB6654AA		J073	ERR8651183	Poultry	2012	Canada	PRJEB50837	SAMEA12943810	2022-08-07
ESC_WA2197AA		E.coli173-R29	SRR13165505	Poultry	2016	Croatia	PRJNA681385	SAMN16954856	2021-08-01
ESC_NA4052AA		wt	SRR9663516	Poultry	2014	Czech Republic	PRJNA553636	SAMN12241734	2019-07-11
ESC_NA4064AA		wt	SRR9663528	Poultry	2014	Czech Republic	PRJNA553636	SAMN12241717	2019-07-11
ESC_NA4075AA		wt	SRR9663539	Poultry	2014	Czech Republic	PRJNA553636	SAMN12241730	2019-07-11
ESC_NA4082AA		wt	SRR9663546	Poultry	2014	Czech Republic	PRJNA553636	SAMN12241743	2019-07-11
ESC_UA3649AA		Ec8	SRR13514127	Poultry	2013	Hungary	PRJNA694299	SAMN17516121	2021-03-01
ESC_PA3461AA		DRS114658	DRR184275	Poultry	2010	Japan	PRJDB8169	SAMD00179304	2019-11-30
ESC_YA7906AA		IWP-052	DRR298384	Poultry	2018	Japan	PRJDB10890	SAMD00262446	2022-03-14
ESC_YA7919AA		IWP-034	DRR298371	Poultry	2018	Japan	PRJDB10890	SAMD00262433	2022-03-14
ESC_YA7920AA		IWP-033	DRR298370	Poultry	2018	Japan	PRJDB10890	SAMD00262432	2022-03-14
ESC_YA7897AA		IWP-061	DRR298393	Poultry	2018	Japan	PRJDB10890	SAMD00262455	2022-03-14
ESC_YA7900AA		IWP-058	DRR298390	Poultry	2018	Japan	PRJDB10890	SAMD00262452	2022-03-14
ESC_YA7901AA		IWP-057	DRR298389	Poultry	2018	Japan	PRJDB10890	SAMD00262451	2022-03-14
ESC_YA7917AA		IWP-036	DRR298373	Poultry	2018	Japan	PRJDB10890	SAMD00262435	2022-03-14
ESC_YA7918AA		IWP-035	DRR298372	Poultry	2018	Japan	PRJDB10890	SAMD00262434	2022-03-14
ESC_YA7804AA		IWP-001	DRR298342	Poultry	2018	Japan	PRJDB10890	SAMD00262404	2022-03-14
ESC_YA8274AA		KAP14	DRR216776	Poultry	2018	Japan	PRJDB9460	SAMD00210452	2022-03-14
ESC_YA8203AA		KAP43	DRR216791	Poultry	2018	Japan	PRJDB9460	SAMD00210467	2022-03-14
ESC_YA8115AA		TAP42	DRR216911	Poultry	2018	Japan	PRJDB9460	SAMD00210587	2022-03-14
ESC_YA8135AA		SAP62	DRR216891	Poultry	2018	Japan	PRJDB9460	SAMD00210567	2022-03-14
ESC_UA5262AA		DTU2018-338-PRJ1121-Escherichia-coli-ESBL3340	ERR5443200	Poultry	2016	Netherlands	PRJEB43584	SAMEA8227263	2021-03-20
ESC_RA5283AA		ampC_0097	SRR11871299	Poultry	2017	Netherlands	PRJNA592140	SAMN15052580	2020-05-29
ESC_RA5235AA		ampC_0110	SRR11871251	Poultry	2017	Netherlands	PRJNA592140	SAMN15052593	2020-05-29
ESC_RA5180AA		ampC_0093	SRR11871196	Poultry	2017	Netherlands	PRJNA592140	SAMN15052576	2020-05-29
ESC_RA5240AA		ampC_0105	SRR11871256	Poultry	2017	Netherlands	PRJNA592140	SAMN15052588	2020-05-29
ESC_RA5285AA		ampC_0095	SRR11871301	Poultry	2017	Netherlands	PRJNA592140	SAMN15052578	2020-05-29
ESC_DB5392AA		2018-01-3168-5-l-1	ERR10798379	Poultry	2018	Norway	PRJEB55163	SAMEA112356487	2023-01-25
ESC_DB5390AA		2019-01-128-2-l-1	ERR10798381	Poultry	2019	Norway	PRJEB55163	SAMEA112356489	2023-01-25
ESC_UA5248AA		DTU2018-498-PRJ1121-Escherichia-coli-ZHZ-1932	ERR5443220	Poultry	2016	Poland	PRJEB43584	SAMEA8227283	2021-03-20
ESC_UA5215AA		DTU2018-505-PRJ1121-Escherichia-coli-160796	ERR5443272	Poultry	2016	Spain	PRJEB43584	SAMEA8227335	2021-03-20
ESC_UA5214AA		DTU2018-308-PRJ1121-Escherichia-coli-162030	ERR5443273	Poultry	2016	Spain	PRJEB43584	SAMEA8227336	2021-03-20
ESC_RA0430AA		APEC_9531	SRR11473342	Poultry	2016	Sweden	PRJNA592536	SAMN14530639	2020-04-08
ESC_RA0434AA		APEC_9528	SRR11473346	Poultry	2016	Sweden	PRJNA592536	SAMN14530636	2020-04-08
ESC_RA0385AA		APEC_3820	SRR11473298	Poultry	2013	United Kingdom	PRJNA592536	SAMN14530512	2020-04-08
ESC_RA0287AA		APEC_9485	SRR11473199	Poultry	2013	United Kingdom	PRJNA592536	SAMN14530604	2020-04-08
ESC_RA0285AA		APEC_9488	SRR11473197	Poultry	2014	United Kingdom	PRJNA592536	SAMN14530606	2020-04-08
ESC_RA0284AA		APEC_9489	SRR11473196	Poultry	2014	United Kingdom	PRJNA592536	SAMN14530607	2020-04-08
ESC_RA0282AA		APEC_9490	SRR11473194	Poultry	2014	United Kingdom	PRJNA592536	SAMN14530608	2020-04-08
ESC_RA0269AA		APEC_9506	SRR11473181	Poultry	2015	United Kingdom	PRJNA592536	SAMN14530620	2020-04-08
ESC_RA0440AA		APEC_9518	SRR11473352	Poultry	2015	United Kingdom	PRJNA592536	SAMN14530630	2020-04-08
ESC_RA0271AA		APEC_9502	SRR11473183	Poultry	2015	United Kingdom	PRJNA592536	SAMN14530618	2020-04-08
ESC_RA0279AA		APEC_9495	SRR11473191	Poultry	2015	United Kingdom	PRJNA592536	SAMN14530611	2020-04-08
ESC_RA0345AA		APEC_7145	SRR11473258	Poultry	2016	United Kingdom	PRJNA592536	SAMN14530548	2020-04-08
ESC_NA9758AA		C6c	SRR10066074	Poultry	2017	United States	PRJNA562910	SAMN12658607	2019-09-05
ESC_OA0267AA		C4a	SRR10097235	Poultry	2017	United States	PRJNA564866	SAMN12725941	2019-09-11
ESC_OA0268AA		C6a	SRR10097236	Poultry	2017	United States	PRJNA564866	SAMN12725940	2019-09-11
ESC_OA0269AA		C7b	SRR10097237	Poultry	2017	United States	PRJNA564866	SAMN12725939	2019-09-11
ESC_OA0270AA		C7a	SRR10097238	Poultry	2017	United States	PRJNA564866	SAMN12725938	2019-09-11
ESC_OA0266AA		C10f	SRR10097234	Poultry	2017	United States	PRJNA564866	SAMN12725942	2019-09-11
ESC_NA8046AA		CVM N18EC0854	SRR9984813	Poultry	2018	United States	PRJNA292663	SAMN12359862	2019-08-20
ESC_PA6566AA		CVM N19EC0422	SRR10687840	Poultry	2019	United States	PRJNA292663	SAMN12943726	2020-01-01
ESC_PA5227AA		CVM N19EC0559	SRR10579954	Poultry	2019	United States	PRJNA292663	SAMN12990658	2019-12-10
ESC_PA6419AA		CVM N19EC0180	SRR10687693	Poultry	2019	United States	PRJNA292663	SAMN12943577	2020-01-01
ESC_SA3241AA		20OH06GT05-EC	SRR12743019	Poultry	2020	United States	PRJNA292663	SAMN16282388	2020-09-30
ESC_UA2914AA		20SD12GT01-EC	SRR13697497	Poultry	2020	United States	PRJNA292663	SAMN17897113	2021-02-13
ESC_YA8412AA		21HI12CB02UCD-EC	SRR18231471	Poultry	2021	United States	PRJNA292663	SAMN26442327	2022-03-14
ESC_YA6119AA		21HI09CB06UCD-EC	SRR18044743	Poultry	2021	United States	PRJNA292663	SAMN25980710	2022-02-17
ESC_WA7737AA		21OH01CB07-EC	SRR15510621	Poultry	2021	United States	PRJNA292663	SAMN20849054	2021-10-01
ESC_CB9418AA		EC_9503_C1_H	SRR22896444	Wild Animal	2021	Canada	PRJNA912639	SAMN32247517	2022-12-19
ESC_CB9596AA		EC_9503_C2_H	SRR22896526	Wild Animal	2021	Canada	PRJNA912639	SAMN32247424	2022-12-19
