# Supplementary material for: Comparison of IncK-blaCMY-2 Plasmids in Extended-Spectrum Cephalosporin-Resistant Escherichia coli Isolated from Poultry and Humans in Denmark, Finland, and Germany
Source: Antibiotics (Basel). 2024 Apr 10;13(4):349. doi: 10.3390/antibiotics13040349 (PMC11047599; doi:10.3390/antibiotics13040349)
Supplement: Supplementary file 1 [file antibiotics-13-00349-s001.zip › Table S5. Plasmids annotation.xlsx]

## Sheet: pSB17040_ST429_IncK_120714BP
#Annotated with Bakta (v1.7.0): https://github.com/oschwengers/bakta
#Database (v5.0): https://doi.org/10.5281/zenodo.4247252
#Sequence Id	Type	Start	Stop	Strand	Locus Tag	Gene	Product	DbXrefs
contig_1	cds	1	873	+	17043192_00005	repA	incFII family plasmid replication initiator RepA	RefSeq:WP_021532687.1, SO:0001217, UniParc:UPI0003915E70, UniRef:UniRef100_A0A7U1E0X7, UniRef:UniRef50_P03066, UniRef:UniRef90_Q5K5Z7
contig_1	oriC	877	1233	?			origin of replication
contig_1	cds	1778	2047	+	17043192_00010	putA1	putative transcriptional regulator, contains ribbon-helix-helix (RHH_1) domain	COG:COG3905, COG:K, RefSeq:WP_000079941.1, SO:0001217, UniParc:UPI00004E5742, UniRef:UniRef100_Q2TU21, UniRef:UniRef50_A0A163I5A9, UniRef:UniRef90_A0A163I5A9
contig_1	cds	2044	2325	+	17043192_00015	relE	Addiction module toxin RelE	RefSeq:WP_000969996.1, SO:0001217, UniParc:UPI00005F0B9C, UniRef:UniRef100_E9LLH3, UniRef:UniRef50_G7QEH3, UniRef:UniRef90_E9LLH3
contig_1	cds	2365	3213	+	17043192_00020		3'-5' exonuclease	RefSeq:WP_001057996.1, SO:0001217, UniParc:UPI00000B024F, UniRef:UniRef100_A0A7H9NJ46, UniRef:UniRef50_A0A0D6IZ33, UniRef:UniRef90_A0A0D6IZ33
contig_1	cds	3531	4208	+	17043192_00025		HTH-Tnp-Mu-2 domain-containing protein	SO:0001217, UniParc:UPI0002582E34, UniRef:UniRef100_A0A8S7RJS3, UniRef:UniRef50_A0A6F8Z4L6, UniRef:UniRef90_A0A6F8Z4L6
contig_1	cds	4193	5053	+	17043192_00030		Carboxylate/Amino Acid/Amine Transporter	RefSeq:WP_000493383.1, SO:0001217, UniParc:UPI0000495FB5, UniRef:UniRef100_A0A0D7YUX9, UniRef:UniRef50_N8ZY49, UniRef:UniRef90_D7XPF4
contig_1	cds	5085	6284	-	17043192_00035	tet(A)	tetracycline efflux MFS transporter Tet(A)	NCBIProtein:WP_000804064.1, RefSeq:WP_000804064.1, SO:0001217, UniParc:UPI000000172C, UniRef:UniRef100_P02982, UniRef:UniRef90_P02982
contig_1	cds	6363	7040	+	17043192_00040	tetR(A)	tetracycline resistance transcriptional repressor TetR(A)	BlastRules:WP_000164043, COG:COG1309, COG:K, GO:0003677, GO:0045892, GO:0046677, GO:0046872, RefSeq:WP_000470728.1, SO:0001217, UniParc:UPI000005D507, UniRef:UniRef100_P03038, UniRef:UniRef50_P03038, UniRef:UniRef90_P03038
contig_1	cds	7072	7314	-	17043192_00045		Relaxase/helicase	RefSeq:WP_000844627.1, SO:0001217, UniParc:UPI00004C3C7C, UniRef:UniRef100_A0A1M0QXX3, UniRef:UniRef50_A0A2P9EC95, UniRef:UniRef90_Q5J475
contig_1	cds	8317	8751	-	17043192_00050	merR	mercury resistance transcriptional regulator MerR	GO:0003677, GO:0006355, GO:0045340, GO:0046689, NCBIProtein:CAA77320.1, RefSeq:WP_000429836.1, SO:0001217, UniParc:UPI0000000F3F, UniRef:UniRef100_P0A2Q8, UniRef:UniRef50_P0A183, UniRef:UniRef90_P0A183
contig_1	cds	8769	9173	+	17043192_00055	merT	mercuric transport protein MerT	GO:0005886, GO:0015097, GO:0046872, NCBIProtein:AAB59075.1, SO:0001217, UniParc:UPI00006DD34B, UniRef:UniRef100_P0A219, UniRef:UniRef50_P04140, UniRef:UniRef90_P0A219
contig_1	cds	9187	9462	+	17043192_00060	merP	mercury resistance system periplasmic binding protein MerP	COG:COG2608, COG:P, GO:0015097, GO:0042597, GO:0045340, NCBIProtein:AAC38219.1, RefSeq:WP_000732292.1, SO:0001217, UniParc:UPI0000000F41, UniRef:UniRef100_P04129, UniRef:UniRef50_P04129, UniRef:UniRef90_P04129
contig_1	cds	9459	9920	+	17043192_00065	merC	organomercurial transporter MerC	GO:0005886, GO:0015097, GO:0046872, NCBIProtein:AAC33908.1, RefSeq:WP_000082530.1, SO:0001217, UniParc:UPI00000B4CF8, UniRef:UniRef100_Q50919, UniRef:UniRef50_Q50919, UniRef:UniRef90_Q50919
contig_1	cds	9972	11666	+	17043192_00070	merA	mercury(II) reductase	COG:COG2608, COG:P, NCBIFam:TIGR02053.1, RefSeq:WP_000105636.1, SO:0001217, UniParc:UPI00000D608C, UniRef:UniRef100_Q93UN8, UniRef:UniRef50_P08332, UniRef:UniRef90_Q93UN8
contig_1	cds	11684	12046	+	17043192_00075	merD	mercury resistance co-regulator MerD	NCBIFam:NF033783.1, RefSeq:WP_001277456.1, SO:0001217, UniParc:UPI00000DCE8E, UniRef:UniRef100_Q7BT53, UniRef:UniRef50_P08332, UniRef:UniRef90_Q7BT53
contig_1	cds	12043	12279	+	17043192_00080	merE	broad-spectrum mercury transporter MerE	GO:0005886, GO:0015097, NCBIFam:NF010310.2, RefSeq:WP_000993386.1, SO:0001217, UniParc:UPI00000DCA49, UniRef:UniRef100_Q7AKA4, UniRef:UniRef50_Q7AKA4, UniRef:UniRef90_Q7AKA4
contig_1	cds	12276	12983	+	17043192_00085		EAL domain-containing protein	SO:0001217, UniParc:UPI00000D12F9, UniRef:UniRef100_B7JCJ5, UniRef:UniRef50_P04162, UniRef:UniRef90_B7JCJ5
contig_1	cds	13058	14737	+	17043192_00090	tniA	TniA protein	RefSeq:WP_000179844.1, SO:0001217, UniParc:UPI00000B5147, UniRef:UniRef100_A0A075MF25, UniRef:UniRef50_K1JAR7, UniRef:UniRef90_V7Z7B8
contig_1	cds	14740	15600	+	17043192_00095		Transposase	RefSeq:WP_000344784.1, SO:0001217, UniParc:UPI00000B2FA6, UniRef:UniRef100_Q7BT56, UniRef:UniRef50_A0A899NCE5, UniRef:UniRef90_A0A2H4UF75
contig_1	cds	15711	17225	+	17043192_00100	tnp	IS21 family IS1326 transposase	COG:COG4584, COG:X, GO:0003677, GO:0006310, GO:0015074, GO:0032196, IS:IS1326, RefSeq:WP_000996451.1, SO:0001217, UniParc:UPI00000B1A37, UniRef:UniRef100_Q6EMC3, UniRef:UniRef50_P0A134, UniRef:UniRef90_P0A134
contig_1	cds	17212	17997	+	17043192_00105	istB	IS21-like element IS1326 family helper ATPase IstB	BlastRules:WP_000983249, COG:COG1484, COG:L, RefSeq:WP_000983249.1, SO:0001217, UniParc:UPI00000B9633, UniRef:UniRef100_Q7BT58, UniRef:UniRef50_D6CPQ8, UniRef:UniRef90_Q7BT58
contig_1	cds	18173	18673	-	17043192_00110	yhbS	putative N-acetyltransferase YhbS	COG:COG3153, COG:R, SO:0001217, UniRef:UniRef50_A0A899NBB6, UniRef:UniRef90_A0A1L2ZNQ8
contig_1	cds	18801	19640	-	17043192_00115	sul1	sulfonamide-resistant dihydropteroate synthase Sul1	COG:COG0294, COG:H, EC:2.5.1.15, GO:0004156, GO:0046654, GO:0046656, GO:0046872, KEGG:K18974, NCBIProtein:WP_000259031.1, RefSeq:WP_000259031.1, SO:0001217, UniParc:UPI000000029B, UniRef:UniRef100_P0C002, UniRef:UniRef50_P0C002, UniRef:UniRef90_P0C002
contig_1	cds	19634	19981	-	17043192_00120	qacEdelta1	quaternary ammonium compound efflux SMR transporter QacE delta 1	GO:0005886, GO:0022857, GO:0042221, NCBIProtein:WP_000679427.1, RefSeq:WP_000679427.1, SO:0001217, UniParc:UPI0000000BEC, UniRef:UniRef100_P0AA22, UniRef:UniRef50_P0AA22, UniRef:UniRef90_P0AA22
contig_1	cds	20199	21434	-	17043192_00125	tnp	IS256 family ISEc58 transposase	IS:ISEc58, RefSeq:WP_001137513.1, SO:0001217, UniParc:UPI0000F54C21, UniRef:UniRef100_C4NW02, UniRef:UniRef50_P80011, UniRef:UniRef90_C4NW02
contig_1	cds	21702	23231	-	17043192_00130		Zn-Tnp-IS91 domain-containing protein	SO:0001217, UniParc:UPI0000D7F307, UniRef:UniRef100_C4NV18, UniRef:UniRef50_A0A866WPE2, UniRef:UniRef90_A0A866WPE2
contig_1	cds	23420	25057	-	17043192_00135	groL	chaperonin GroEL	COG:COG0459, COG:O, EC:5.6.1.7, GO:0005524, GO:0005737, GO:0016853, GO:0042026, GO:0051082, GO:0140662, RefSeq:WP_000719078.1, SO:0001217, UniParc:UPI0000D7F306, UniRef:UniRef100_Q19NJ4, UniRef:UniRef50_P29842, UniRef:UniRef90_Q19NJ4
contig_1	cds	25113	25505	-	17043192_00140	groES	co-chaperone GroES	KEGG:K04078, SO:0001217, UniParc:UPI0001DC9FD7, UniRef:UniRef100_C4NV16, UniRef:UniRef50_P0A0R5, UniRef:UniRef90_C4NV16
contig_1	cds	25640	26542	-	17043192_00145	aac(3)-VIa	aminoglycoside N-acetyltransferase AAC(3)-VIa	EC:2.3.1.81, KEGG:K00662, NCBIProtein:WP_000131886.1, SO:0001217, UniParc:UPI0000D7F305, UniRef:UniRef100_C4NV15, UniRef:UniRef50_C4NV15, UniRef:UniRef90_C4NV15
contig_1	cds	26706	27485	-	17043192_00150	aadA1	ANT(3'')-Ia family aminoglycoside nucleotidyltransferase AadA1	EC:2.7.7.47, GO:0005524, GO:0009012, GO:0046677, GO:0070566, NCBIProtein:WP_046622360.1, RefSeq:WP_001360292.1, SO:0001217, UniParc:UPI00000BC0BB, UniRef:UniRef100_A0A6D1LU07, UniRef:UniRef50_P0AG05, UniRef:UniRef90_P0AG05
contig_1	ncRNA-region	27475	27553	-			putative aminoglycoside riboswitch / attI site	RFAM:RF02912, SO:0000035
contig_1	sorf	27503	27541	-	17043192_00155	estX	Streptomycin 3''-O-adenylyltransferase	SO:0001217, UniParc:UPI00000B6A7E, UniRef:UniRef100_A9QNW9, UniRef:UniRef50_A0A2R4A7Q1, UniRef:UniRef90_A0A2R4A7Q1
contig_1	cds	27646	28659	+	17043192_00160	intI1	class 1 integron integrase IntI1	BlastRules:WP_000845054, COG:COG4974, COG:L, GO:0003677, GO:0006310, GO:0015074, GO:0044826, GO:0046718, GO:0075713, RefSeq:WP_000845048.1, SO:0001217, UniParc:UPI0000000166, UniRef:UniRef100_P62590, UniRef:UniRef50_P62590, UniRef:UniRef90_P62590
contig_1	cds	28862	29212	+	17043192_00165	tnpM	Transposon Tn21 modulator protein	RefSeq:WP_000454193.1, SO:0001217, UniParc:UPI0000000F42, UniRef:UniRef100_P04162, UniRef:UniRef50_P04162, UniRef:UniRef90_P04162
contig_1	cds	29338	29898	+	17043192_00170	tnpR	Transposon Tn21 resolvase	COG:COG1961, COG:L, GO:0000150, GO:0003677, GO:0015074, RefSeq:WP_000147567.1, SO:0001217, UniParc:UPI000000091B, UniRef:UniRef100_P04130, UniRef:UniRef50_P04130, UniRef:UniRef90_P04130
contig_1	cds	29901	32867	+	17043192_00175	tnpA	Tn3-like element TnAs3 family transposase	BlastRules:WP_001138064, COG:COG4644, COG:X, GO:0003677, GO:0004803, GO:0006313, RefSeq:WP_001138064.1, SO:0001217, UniParc:UPI00000BD78D, UniRef:UniRef100_Q7BT65, UniRef:UniRef50_P06694, UniRef:UniRef90_P06694
contig_1	cds	32909	33292	+	17043192_00180	yadA	YadA	RefSeq:WP_001372421.1, SO:0001217, UniParc:UPI0002057F85, UniRef:UniRef100_A0A1M1W9W3, UniRef:UniRef50_A0A4C9BZA8, UniRef:UniRef90_A0A1M1W9W3
contig_1	cds	33427	33660	+	17043192_00185		Hok/Gef family protein	RefSeq:WP_001334656.1, SO:0001217, UniParc:UPI00000BC96A, UniRef:UniRef100_W0LZZ1, UniRef:UniRef50_A0A2A6Q4Z9, UniRef:UniRef90_A0A5X4H2X2
contig_1	cds	33769	34038	-	17043192_00190	yaeB	YaeB protein	SO:0001217, UniParc:UPI000198F201, UniRef:UniRef100_C1J8K1, UniRef:UniRef50_A0A4Y1SPF2, UniRef:UniRef90_A0A086VEG2
contig_1	cds	34035	34529	-	17043192_00195	yafA	Protein YafA	RefSeq:WP_001442119.1, SO:0001217, UniParc:UPI0001F85542, UniRef:UniRef100_A0A075UH56, UniRef:UniRef50_A0A709KQZ9, UniRef:UniRef90_A0A709KQZ9
contig_1	cds	34585	35187	-	17043192_00200	proQ	ProQ domain-containing protein	RefSeq:WP_000517689.1, SO:0001217, UniParc:UPI0001F85543, UniRef:UniRef100_E9LLJ5, UniRef:UniRef50_E0J3E6, UniRef:UniRef90_E0J3E6
contig_1	cds	35334	35699	+	17043192_00205	tnp	IS3 family IS2 transposase ORF A	GO:0003677, GO:0004803, GO:0006313, IS:IS2, RefSeq:WP_000567766.1, SO:0001217, UniParc:UPI00000002A2, UniRef:UniRef100_P0C5W3, UniRef:UniRef50_P0CF60, UniRef:UniRef90_P0C5W3
contig_1	cds	35657	36562	+	17043192_00210	tnp	IS3 family IS2 transposase ORF B	COG:COG2801, COG:X, GO:0003677, GO:0006310, GO:0015074, GO:0032196, IS:IS2, RefSeq:WP_000376502.1, SO:0001217, UniParc:UPI0000000AAC, UniRef:UniRef100_P0C5W5, UniRef:UniRef50_P0CF62, UniRef:UniRef90_P0CF62
contig_1	cds	36877	38223	+	17043192_00215	yagA	YagA	RefSeq:WP_001132019.1, SO:0001217, UniParc:UPI0001FB5D18, UniRef:UniRef100_E9LLJ6, UniRef:UniRef50_C6K7P8, UniRef:UniRef90_E9LLJ6
contig_1	cds	38502	40289	+	17043192_00220		CHANNEL-COLICIN domain-containing protein	RefSeq:WP_250394606.1, SO:0001217, UniParc:UPI001AF08622, UniRef:UniRef100_A0A890DKM9, UniRef:UniRef50_P06716, UniRef:UniRef90_A0A890DKM9
contig_1	cds	40399	40746	-	17043192_00225		Colicin-Ib immunity protein	GO:0005886, GO:0015643, GO:0030153, RefSeq:WP_000762580.1, SO:0001217, UniParc:UPI00000C06E5, UniRef:UniRef100_Q3ZU31, UniRef:UniRef50_P08702, UniRef:UniRef90_P08702
contig_1	cds	40865	41212	+	17043192_00230		Transmembrane protein	RefSeq:WP_000142424.1, SO:0001217, UniParc:UPI0001F85545, UniRef:UniRef100_E9LLJ9, UniRef:UniRef50_C8CGI7, UniRef:UniRef90_E9LLJ9
contig_1	cds	41230	41820	-	17043192_00235	ydeA	YdeA protein	RefSeq:WP_000194555.1, SO:0001217, UniParc:UPI000217D6C9, UniRef:UniRef100_A0A1M2PG57, UniRef:UniRef50_A0A0A0GLC8, UniRef:UniRef90_A0A0A0GLC8
contig_1	cds	41817	42077	-	17043192_00240	ydfA	YdfA	RefSeq:WP_000343102.1, SO:0001217, UniParc:UPI0001F85547, UniRef:UniRef100_E9LLK1, UniRef:UniRef50_E9LLK1, UniRef:UniRef90_E9LLK1
contig_1	cds	42645	43058	+	17043192_00245	yedA	YedA	RefSeq:WP_000465034.1, SO:0001217, UniParc:UPI00005EEBF9, UniRef:UniRef100_C1J8C0, UniRef:UniRef50_L3PH07, UniRef:UniRef90_L3PH07
contig_1	cds	43060	43842	+	17043192_00250	resD	Resolvase	COG:COG4974, COG:L, GO:0003677, GO:0006310, GO:0015074, RefSeq:WP_058799171.1, SO:0001217, UniParc:UPI0007373673, UniRef:UniRef100_A0A7T5XS75, UniRef:UniRef50_P06615, UniRef:UniRef90_P18021
contig_1	cds	43973	44248	-	17043192_00255		RHH-5 domain-containing protein	RefSeq:WP_000239529.1, SO:0001217, UniParc:UPI00000BC1AD, UniRef:UniRef100_T1NXB3, UniRef:UniRef50_W0I3U6, UniRef:UniRef90_A0A2L1KKS6
contig_1	cds	44242	44886	-	17043192_00260		AAA family ATPase	RefSeq:WP_000633913.1, SO:0001217, UniParc:UPI00004C3C7F, UniRef:UniRef100_A0A0U2ZRC9, UniRef:UniRef50_Q0H055, UniRef:UniRef90_Q0H055
contig_1	cds	45115	46086	+	17043192_00265	parM	Plasmid segregation protein parM	RefSeq:WP_001103691.1, SO:0001217, UniParc:UPI0002BAE85D, UniRef:UniRef100_A0A266HX65, UniRef:UniRef50_A0A7I7AGK1, UniRef:UniRef90_A0A2X1NVR8
contig_1	cds	46091	46483	+	17043192_00270		Plasmid partitioning/stability family protein	RefSeq:WP_000340829.1, SO:0001217, UniParc:UPI00004C3C80, UniRef:UniRef100_Q5JBI8, UniRef:UniRef50_Q5JBI8, UniRef:UniRef90_Q5JBI8
contig_1	cds	46488	47759	-	17043192_00275	impB	Protein ImpB	GO:0003684, GO:0006281, GO:0009432, KEGG:K03502, RefSeq:WP_058799170.1, SO:0001217, UniParc:UPI000736721A, UniRef:UniRef100_A0A826JXZ0, UniRef:UniRef50_P04152, UniRef:UniRef90_P18642
contig_1	cds	47759	48196	-	17043192_00280	impA	Protein ImpA	EC:3.4.21.-, GO:0003677, GO:0006281, GO:0006355, GO:0006508, GO:0008236, GO:0009432, RefSeq:WP_058799169.1, SO:0001217, UniParc:UPI0007376043, UniRef:UniRef100_A0A7T5XSH4, UniRef:UniRef50_Q7M1C0, UniRef:UniRef90_Q7M1C0
contig_1	cds	48193	48441	-	17043192_00285	impC	Protein ImpC	GO:0006281, RefSeq:WP_000618110.1, SO:0001217, UniParc:UPI000000111C, UniRef:UniRef100_P0A1G1, UniRef:UniRef50_P0A1G1, UniRef:UniRef90_P0A1G1
contig_1	cds	48835	49761	+	17043192_00290		DUF1281 domain-containing protein	SO:0001217, UniParc:UPI0001B22EFE, UniRef:UniRef100_A0A346JDT9, UniRef:UniRef50_Q9S4X4, UniRef:UniRef90_A7ZGV9
contig_1	cds	49758	50069	+	17043192_00295	yfbA	YfbA	RefSeq:WP_031942433.1, SO:0001217, UniParc:UPI0003E001E7, UniRef:UniRef100_W0FK75, UniRef:UniRef50_Q9S4X3, UniRef:UniRef90_W0FK75
contig_1	cds	50145	50828	+	17043192_00300		Methyltransferase	RefSeq:WP_000086147.1, SO:0001217, UniParc:UPI0001DCA133, UniRef:UniRef100_E9LLK8, UniRef:UniRef50_A0A061KA45, UniRef:UniRef90_A0A061KA45
contig_1	cds	50829	51050	+	17043192_00305		Cytoplasmic protein	RefSeq:WP_001104881.1, SO:0001217, UniParc:UPI00003CEFC0, UniRef:UniRef100_A0A3Z4X4D7, UniRef:UniRef50_A0A093DB27, UniRef:UniRef90_A0A093DB27
contig_1	cds	51064	51498	+	17043192_00310		DUF1380 domain-containing protein	RefSeq:WP_000274500.1, SO:0001217, UniParc:UPI0001825C52, UniRef:UniRef100_E9LLV9, UniRef:UniRef50_O82898, UniRef:UniRef90_E0WGW5
contig_1	cds	51544	52320	+	17043192_00315	ychA	YchA	RefSeq:WP_052929989.1, SO:0001217, UniParc:UPI00069C502F, UniRef:UniRef100_A0A5T8ADG8, UniRef:UniRef50_Q65AD0, UniRef:UniRef90_E0J3A8
contig_1	cds	52736	53161	+	17043192_00320	yubI	Putative antirestriction protein YubI	RefSeq:WP_001198928.1, SO:0001217, UniParc:UPI00002265AA, UniRef:UniRef100_D9Z560, UniRef:UniRef50_Q9S4W7, UniRef:UniRef90_Q9S4W7
contig_1	cds	53208	53630	+	17043192_00325		DUF1380 domain-containing protein	RefSeq:WP_000271744.1, SO:0001217, UniParc:UPI000243D087, UniRef:UniRef100_W0FK70, UniRef:UniRef50_O82902, UniRef:UniRef90_Q08JJ5
contig_1	cds	53627	53818	+	17043192_00330		Plasmid protein	RefSeq:WP_001027495.1, SO:0001217, UniParc:UPI00000B6A7A, UniRef:UniRef100_Q9S4W6, UniRef:UniRef50_Q1A2M1, UniRef:UniRef90_Q1A2M1
contig_1	cds	54571	55005	+	17043192_00335	pndC	Post-segregation killing protein PndC	RefSeq:WP_029392001.1, SO:0001217, UniParc:UPI00041E49CA, UniRef:UniRef100_A0A3A3E2G8, UniRef:UniRef50_A0A2S1PNQ5, UniRef:UniRef90_A0A2S1PNQ5
contig_1	cds	55097	55363	+	17043192_00340		YDFB protein	RefSeq:WP_001247862.1, SO:0001217, UniParc:UPI00000BB15D, UniRef:UniRef100_A0A6G9I3Z0, UniRef:UniRef50_Q3ZU57, UniRef:UniRef90_A0A6G9I3Z0
contig_1	cds	55428	56345	+	17043192_00345		Transposase-31 domain-containing protein	RefSeq:WP_029392002.1, SO:0001217, UniParc:UPI0003DB7BDB, UniRef:UniRef100_W1F7I9, UniRef:UniRef50_A0A0J5LC62, UniRef:UniRef90_A0A1Q6AMC2
contig_1	cds	56407	56565	+	17043192_00350		Transposase	SO:0001217, UniParc:UPI0003DCBF23, UniRef:UniRef100_A0A142CPJ2, UniRef:UniRef50_A0A142CPJ2, UniRef:UniRef90_A0A142CPJ2
contig_1	cds	56596	56847	-	17043192_00355		XRE family transcriptional regulator	RefSeq:WP_000148285.1, SO:0001217, UniParc:UPI00000B0833, UniRef:UniRef100_C1J8S2, UniRef:UniRef50_U9Z629, UniRef:UniRef90_U9Z629
contig_1	cds	56881	57183	-	17043192_00360		hypothetical protein	RefSeq:WP_166783726.1, SO:0001217, UniParc:UPI0003DD9931, UniRef:UniRef100_A0A142CPJ0, UniRef:UniRef50_A0A0A0GSQ4, UniRef:UniRef90_A0A376MGV9
contig_1	cds	57427	58275	+	17043192_00365		DUF4942 domain-containing protein	RefSeq:WP_021532736.1, SO:0001217, UniParc:UPI000390A732, UniRef:UniRef100_A0A2X9WI86, UniRef:UniRef50_E0J392, UniRef:UniRef90_E0J392
contig_1	cds	58361	58696	-	17043192_00370	mobC	Molybdopterin-guanine dinucleotide biosynthesis protein MobC	RefSeq:WP_000157103.1, SO:0001217, UniParc:UPI0002BA2CD6, UniRef:UniRef100_A0A2S1J8J5, UniRef:UniRef50_A0A0H3F3Y4, UniRef:UniRef90_A0A0H3F3Y4
contig_1	oriT	58814	58901	?			origin of transfer
contig_1	cds	58929	59261	+	17043192_00375	mobA	plasmid mobilization protein MobA	RefSeq:WP_001291058.1, SO:0001217, UniParc:UPI0001DB94C3, UniRef:UniRef100_A0A2H4UFE7, UniRef:UniRef50_B7LIM5, UniRef:UniRef90_B7LIM5
contig_1	cds	59273	61993	+	17043192_00380	nikB	NikB	RefSeq:WP_029391987.1, SO:0001217, UniParc:UPI0003FA60B3, UniRef:UniRef100_A0A2H5C199, UniRef:UniRef50_A0A0E2KX26, UniRef:UniRef90_Q68J83
contig_1	cds	62214	64514	-	17043192_00385		TraG-D-C domain-containing protein	RefSeq:WP_029392471.1, SO:0001217, UniParc:UPI0004201011, UniRef:UniRef100_A0A2H5C181, UniRef:UniRef50_A0A0J1PVM5, UniRef:UniRef90_A0A0F6YSX4
contig_1	cds	64495	65613	-	17043192_00390		Thiol:disulfide interchange protein	KEGG:K12228, RefSeq:WP_029391999.1, SO:0001217, UniParc:UPI0003DC92DB, UniRef:UniRef100_A0A2H5C9N6, UniRef:UniRef50_Q68J85, UniRef:UniRef90_A0A066QAU6
contig_1	cds	65610	66971	-	17043192_00395	trbA	Conjugal transfer protein TrbA	RefSeq:WP_041498596.1, SO:0001217, UniParc:UPI00059F6F3E, UniRef:UniRef100_A0A172ERL1, UniRef:UniRef50_S1Q9Z2, UniRef:UniRef90_S1Q9Z2
contig_1	ncRNA	67122	67209	-	17043192_00400	agrB	ArsR-gov region gene B	RFAM:RF02891, SO:0000655
contig_1	cds	67428	67604	-	17043192_00405		WGR domain-containing protein	RefSeq:WP_032172741.1, SO:0001217, UniParc:UPI0003DC0836, UniRef:UniRef100_A0A826ZQA3, UniRef:UniRef50_U9Z0P3, UniRef:UniRef90_C1J8Q7
contig_1	cds	67755	68222	-	17043192_00410		Endonuclease	RefSeq:WP_000598962.1, SO:0001217, UniParc:UPI00016C7D32, UniRef:UniRef100_C1J8Q6, UniRef:UniRef90_C1J8Q6
contig_1	cds	68325	69005	+	17043192_00415		DNA-binding protein	SO:0001217, UniParc:UPI0001FB4EFE, UniRef:UniRef100_A0A148HHL5, UniRef:UniRef50_A0A0E2LAR1, UniRef:UniRef90_A0A0E2LAR1
contig_1	cds	68955	69206	-	17043192_00420		Neurotensin receptor R8	SO:0001217, UniParc:UPI000390BDB9, UniRef:UniRef100_A0A0X5FIL8, UniRef:UniRef50_D8AFZ9, UniRef:UniRef90_A0A0E2KWM3
contig_1	cds	69203	69418	-	17043192_00425		Secreted protein	RefSeq:WP_000266543.1, SO:0001217, UniParc:UPI00000DF007, UniRef:UniRef100_Q68J91, UniRef:UniRef50_Q68J91, UniRef:UniRef90_Q68J91
contig_1	cds	69422	69790	-	17043192_00430		Phage protein	RefSeq:WP_029391948.1, SO:0001217, UniParc:UPI0004250363, UniRef:UniRef100_A0A172DTR3, UniRef:UniRef50_A0A1Q4PLP1, UniRef:UniRef90_A0A1Q4PLP1
contig_1	cds	70089	70331	-	17043192_00435		Deoxyhypusine synthase	RefSeq:WP_029391947.1, SO:0001217, UniParc:UPI000421E4E8, UniRef:UniRef100_A0A2H5C1A9, UniRef:UniRef50_A0A2H5C1A9, UniRef:UniRef90_A0A2H5C1A9
contig_1	ncRNA	70506	70662	+	17043192_00440	sok	sok antitoxin (CssrC)	RFAM:RF01794, SO:0000655
contig_1	cds	70809	70970	-	17043192_00445		Antitoxin	RefSeq:WP_021580032.1, SO:0001217, UniParc:UPI0003915E67, UniRef:UniRef100_A0A0X5FHZ4, UniRef:UniRef50_A0A0X5FHZ4, UniRef:UniRef90_A0A0X5FHZ4
contig_1	cds	71352	71561	+	17043192_00450		HEAT repeat domain-containing protein	RefSeq:WP_000062946.1, SO:0001217, UniParc:UPI0003914889, UniRef:UniRef100_A0A0L6XSZ7, UniRef:UniRef50_A0A0L6XSZ7, UniRef:UniRef90_A0A0L6XSZ7
contig_1	cds	71626	72279	-	17043192_00455	excA	plasmid IncI1-type surface exclusion protein ExcA	RefSeq:WP_029391946.1, SO:0001217, UniParc:UPI000461A25D, UniRef:UniRef100_A0A2H5C136, UniRef:UniRef50_P05839, UniRef:UniRef90_E0WH05
contig_1	cds	72367	74532	-	17043192_00460		DotA/TraY family protein	RefSeq:WP_029391945.1, SO:0001217, UniParc:UPI0003DCAB95, UniRef:UniRef100_A0A220QJD0, UniRef:UniRef50_Q7WUD0, UniRef:UniRef90_Q7WUD0
contig_1	cds	74605	75174	-	17043192_00465	traX	conjugal transfer protein TraX	RefSeq:WP_000650755.1, SO:0001217, UniParc:UPI00001B5E3E, UniRef:UniRef100_Q7WUD1, UniRef:UniRef50_A0A0F6YRU4, UniRef:UniRef90_A0A0F6YRU4
contig_1	cds	75171	76376	-	17043192_00470	traW	conjugal transfer protein TraW	RefSeq:WP_029391944.1, SO:0001217, UniParc:UPI00041311D0, UniRef:UniRef100_A0A2H5C142, UniRef:UniRef50_A0A0J2D115, UniRef:UniRef90_A0A0F6WFY6
contig_1	cds	76337	76954	-	17043192_00475	traV	Conjugal transfer protein TraV	RefSeq:WP_029391943.1, SO:0001217, UniParc:UPI0004176663, UniRef:UniRef100_A0A0D8WHG2, UniRef:UniRef50_D8AG13, UniRef:UniRef90_D8AG13
contig_1	cds	76954	79998	-	17043192_00480		ATP-binding protein	EC:7.2.4.8, KEGG:K12206, RefSeq:WP_029391942.1, SO:0001217, UniParc:UPI0003DC1E7C, UniRef:UniRef100_A0A2H5C137, UniRef:UniRef50_E9LML1, UniRef:UniRef90_A0A066QJA7
contig_1	cds	80174	80554	-	17043192_00485		Transposase	SO:0001217, UniParc:UPI0002A2D7C2, UniRef:UniRef100_Q7WUD5, UniRef:UniRef50_A0A2I6F7X7, UniRef:UniRef90_A0A1Q4PM31
contig_1	cds	80554	80862	-	17043192_00490		Cytochrome P450	RefSeq:WP_029391941.1, SO:0001217, UniParc:UPI00040055A9, UniRef:UniRef100_A0A2H5C9Q3, UniRef:UniRef50_A0A2H5C9Q3, UniRef:UniRef90_A0A2H5C9Q3
contig_1	ncRNA-region	80995	81039	+			Guanidine-II riboswitch	RFAM:RF01068, SO:0000035
contig_1	cds	81058	81375	+	17043192_00495	sugE	quaternary ammonium compound efflux SMR transporter SugE	BlastRules:WP_000118520, RefSeq:WP_000118520.1, SO:0001217, UniParc:UPI000000076B, UniRef:UniRef100_Q79IF2, UniRef:UniRef90_Q79IF2
contig_1	cds	81372	81905	-	17043192_00500	blc	Outer membrane lipoprotein Blc	COG:COG3040, COG:M, GO:0008289, GO:0009279, KEGG:K03098, RefSeq:WP_001221666.1, SO:0001217, UniParc:UPI00001B4813, UniRef:UniRef100_B6VP23, UniRef:UniRef50_P0A902, UniRef:UniRef90_Q46036
contig_1	cds	81999	83144	-	17043192_00505	blaCMY-2	class C beta-lactamase CMY-2	NCBIProtein:WP_000976514.1, RefSeq:WP_000976514.1, SO:0001217, UniParc:UPI00000BA718, UniRef:UniRef100_C4NUY1, UniRef:UniRef90_P05193
contig_1	cds	83468	84730	-	17043192_00510	tnp	IS1380 family ISEc9 transposase	IS:ISEc9, RefSeq:WP_000608644.1, SO:0001217, UniParc:UPI00000B4557, UniRef:UniRef100_Q6SJ63, UniRef:UniRef50_Q6SJ63, UniRef:UniRef90_Q6SJ63
contig_1	cds	84827	85012	-	17043192_00515		DNA-directed RNA polymerase	RefSeq:WP_029394194.1, SO:0001217, UniParc:UPI000460F9B6, UniRef:UniRef100_A0A890DKA6, UniRef:UniRef50_A0A6L6I8E7, UniRef:UniRef90_A0A890DKA6
contig_1	cds	85067	85708	-	17043192_00520	traT	Conjugal transfer protein TraT	SO:0001217, UniParc:UPI000390E15E, UniRef:UniRef100_A0A2H5C140, UniRef:UniRef50_A0A2H5C140, UniRef:UniRef90_A0A2H5C140
contig_1	cds	85800	86051	-	17043192_00525	traS	Plasmid conjugative transfer protein TraS	RefSeq:WP_021532719.1, SO:0001217, UniParc:UPI0003918763, UniRef:UniRef100_A0A7U1E160, UniRef:UniRef50_A0A2H4UFH5, UniRef:UniRef90_A0A2H4UFH5
contig_1	cds	86108	86506	-	17043192_00530	traR	Conjugal transfer protein TraR	RefSeq:WP_029391936.1, SO:0001217, UniParc:UPI0003DCA9EC, UniRef:UniRef100_A0A0D8WJN7, UniRef:UniRef50_B7LIR1, UniRef:UniRef90_A0A0F6SKF4
contig_1	cds	86553	87083	-	17043192_00535	traQ	conjugal transfer protein TraQ	RefSeq:WP_000987022.1, SO:0001217, UniParc:UPI0001E8D251, UniRef:UniRef100_V5KBY9, UniRef:UniRef50_A0A2P9E6L6, UniRef:UniRef90_V5KBY9
contig_1	cds	87080	87793	-	17043192_00540	traP	conjugal transfer protein TraP	RefSeq:WP_021532717.1, SO:0001217, UniParc:UPI0003917F66, UniRef:UniRef100_A0A0D8WMV3, UniRef:UniRef50_A0A403LR45, UniRef:UniRef90_A0A403LR45
contig_1	cds	87790	89121	-	17043192_00545	traO	conjugal transfer protein TraO	KEGG:K12209, RefSeq:WP_029391934.1, SO:0001217, UniParc:UPI0003DD6D78, UniRef:UniRef100_A0A2H5C118, UniRef:UniRef50_Q7WUE2, UniRef:UniRef90_Q7WUE2
contig_1	cds	89125	90099	-	17043192_00550	traN	Conjugal transfer protein TraN	RefSeq:WP_029391933.1, SO:0001217, UniParc:UPI0003F99E73, UniRef:UniRef100_A0A2H5C9W5, UniRef:UniRef50_A0A6G6AJX9, UniRef:UniRef90_A0A6G6AJX9
contig_1	cds	90110	90805	-	17043192_00555	traM	Conjugal transfer protein TraM	RefSeq:WP_029391932.1, SO:0001217, UniParc:UPI0003DDE85C, UniRef:UniRef100_A0A2U9HX21, UniRef:UniRef50_B7LIR6, UniRef:UniRef90_B7LIR6
contig_1	cds	90817	91167	-	17043192_00560		Conjugal transfer protein	RefSeq:WP_021532713.1, SO:0001217, UniParc:UPI0003913298, UniRef:UniRef100_A0A0D8WJN4, UniRef:UniRef50_Q7WUE5, UniRef:UniRef90_Q7WUE5
contig_1	cds	91184	95245	-	17043192_00565		DNA primase	RefSeq:WP_029391931.1, SO:0001217, UniParc:UPI00040BFC79, UniRef:UniRef100_A0A2H5C9Y4, UniRef:UniRef50_A0A2X1QGS3, UniRef:UniRef90_A0A2H5C9Y4
contig_1	cds	95309	95599	-	17043192_00570	icmT	IcmT/TraK family protein	RefSeq:WP_000817799.1, SO:0001217, UniParc:UPI00001B5E2E, UniRef:UniRef100_Q7WUE7, UniRef:UniRef50_Q68JB3, UniRef:UniRef90_Q68JB3
contig_1	cds	95596	96744	-	17043192_00575	traJ	plasmid transfer ATPase TraJ	EC:7.2.4.8, KEGG:K12203, RefSeq:WP_000625247.1, SO:0001217, UniParc:UPI00001B5E2D, UniRef:UniRef100_Q7WUE8, UniRef:UniRef50_D9Z522, UniRef:UniRef90_Q7WUE8
contig_1	cds	96728	97564	-	17043192_00580		Conjugal transfer protein	RefSeq:WP_029391930.1, SO:0001217, UniParc:UPI0003DD1247, UniRef:UniRef100_A0A2H5C155, UniRef:UniRef50_A0A7G3L7Q4, UniRef:UniRef90_Q7WUE9
contig_1	cds	97561	98013	-	17043192_00585		DotD/TraH family lipoprotein	RefSeq:WP_001081199.1, SO:0001217, UniParc:UPI00022442C9, UniRef:UniRef100_A0A075MDW6, UniRef:UniRef50_A0A811AQR4, UniRef:UniRef90_A0A210BF96
contig_1	cds	98062	98232	-	17043192_00590		Acetyltransferase	RefSeq:WP_001597011.1, SO:0001217, UniParc:UPI0002A2323E, UniRef:UniRef100_A0A075MFK4, UniRef:UniRef50_W5VGQ4, UniRef:UniRef90_W5VGQ4
contig_1	cds	98372	99574	-	17043192_00595	traF	Conjugal transfer protein TraF	RefSeq:WP_029391929.1, SO:0001217, UniParc:UPI0003DC637E, UniRef:UniRef100_A0A2H5C108, UniRef:UniRef50_C1J8M7, UniRef:UniRef90_A0A2H5C108
contig_1	cds	99664	100485	-	17043192_00600	traE	Conjugal transfer protein TraE	RefSeq:WP_000804089.1, SO:0001217, UniParc:UPI0002636E49, UniRef:UniRef100_A0A0H0LAG8, UniRef:UniRef50_A0A2P9E787, UniRef:UniRef90_A0A2S1J6N9
contig_1	cds	100736	101281	-	17043192_00605	traD	TraD protein	RefSeq:WP_029391928.1, SO:0001217, UniParc:UPI0003DCFB3C, UniRef:UniRef100_A0A2H5C9T9, UniRef:UniRef50_A0A791V1U5, UniRef:UniRef90_A0A2H5C9T9
contig_1	cds	101400	101681	-	17043192_00610		Polyribonucleotide nucleotidyltransferase	RefSeq:WP_029391927.1, SO:0001217, UniParc:UPI0004619515, UniRef:UniRef100_A0A0X5FI28, UniRef:UniRef50_V5KBV6, UniRef:UniRef90_A0A0X5FI28
contig_1	cds	101722	102891	-	17043192_00615		Integrase	RefSeq:WP_029391926.1, SO:0001217, UniParc:UPI0003DC90BF, UniRef:UniRef100_A0A2H5C112, UniRef:UniRef50_P16470, UniRef:UniRef90_V5KC02
contig_1	cds	103320	103460	-	17043192_00620		hypothetical protein	RefSeq:WP_021511764.1, SO:0001217, UniParc:UPI0003913EE5, UniRef:UniRef100_A0A142CPD1, UniRef:UniRef50_A0A142CPD1, UniRef:UniRef90_A0A142CPD1
contig_1	cds	104009	104170	+	17043192_00625		hypothetical protein
contig_1	cds	104124	104357	+	17043192_00630		Shufflon protein C	SO:0001217, UniParc:UPI0003DD6A6E, UniRef:UniRef100_A0A7B6J6J7, UniRef:UniRef50_P09751, UniRef:UniRef90_P09749
contig_1	cds	104682	104978	+	17043192_00635	pilV	Shufflon system plasmid conjugative transfer pilus tip adhesin PilV	RefSeq:WP_001014412.1, SO:0001217, UniParc:UPI0001FB65A6, UniRef:UniRef100_A0A2S1J8Q9, UniRef:UniRef50_C1J8M4, UniRef:UniRef90_A0A0E2LAM6
contig_1	cds	104983	106317	-	17043192_00640		Shufflon protein	RefSeq:WP_059327959.1, SO:0001217, UniParc:UPI00075171F8, UniRef:UniRef100_A0A2H5C145, UniRef:UniRef50_C1J8M4, UniRef:UniRef90_A0A244BD29
contig_1	cds	106314	107021	-	17043192_00645		Prepilin peptidase	RefSeq:WP_202110611.1, SO:0001217, UniParc:UPI0007DE2208, UniRef:UniRef100_A0A172DTE5, UniRef:UniRef50_A0A2T3SZH6, UniRef:UniRef90_A0A2T3SZH6
contig_1	cds	106981	107457	-	17043192_00650		Lytic transglycosylase	RefSeq:WP_029391914.1, SO:0001217, UniParc:UPI0003DDC451, UniRef:UniRef100_A0A0X5FIA3, UniRef:UniRef50_L3Q828, UniRef:UniRef90_D9CGV5
contig_1	cds	107516	108052	-	17043192_00655	pilS	PilS	RefSeq:WP_029391915.1, SO:0001217, UniParc:UPI000405E069, UniRef:UniRef100_A0A2H5C9K9, UniRef:UniRef50_A0A2T3SZH1, UniRef:UniRef90_D9CGV4
contig_1	cds	108103	109203	-	17043192_00660	pilR	PilR	RefSeq:WP_029391916.1, SO:0001217, UniParc:UPI00042728B0, UniRef:UniRef100_A0A172DTF8, UniRef:UniRef50_V5KCD5, UniRef:UniRef90_D9CGV3
contig_1	cds	109205	110713	-	17043192_00665		ATPase	RefSeq:WP_021532701.1, SO:0001217, UniParc:UPI00039120E1, UniRef:UniRef100_A0A0X5FI36, UniRef:UniRef50_H1ZXY5, UniRef:UniRef90_Q932T7
contig_1	cds	110810	111406	-	17043192_00670		Inner membrane protein	RefSeq:WP_029391917.1, SO:0001217, UniParc:UPI0003F98937, UniRef:UniRef100_A0A2S1J922, UniRef:UniRef50_A0A828HNY0, UniRef:UniRef90_A0A828HNY0
contig_1	cds	111502	112056	-	17043192_00675		Transmembrane protein	RefSeq:WP_021532699.1, SO:0001217, UniParc:UPI000390F95E, UniRef:UniRef100_A0A0L6XSL4, UniRef:UniRef50_A0A0L6XSL4, UniRef:UniRef90_A0A0L6XSL4
contig_1	cds	112105	112557	-	17043192_00680	pilP	Pilus assembly protein PilP	RefSeq:WP_029391918.1, SO:0001217, UniParc:UPI0003DB69D6, UniRef:UniRef100_A0A172DT69, UniRef:UniRef50_A0A2H4UFK0, UniRef:UniRef90_A0A2H4UFK0
contig_1	cds	112547	113842	-	17043192_00685		Pilus assembly protein	RefSeq:WP_021532697.1, SO:0001217, UniParc:UPI000390E260, UniRef:UniRef100_A0A0D8WFB9, UniRef:UniRef50_A0A5E9SGU0, UniRef:UniRef90_A0A5E9SGU0
contig_1	cds	113863	115482	-	17043192_00690	pilN	PilN family type IVB pilus formation outer membrane protein	RefSeq:WP_021532696.1, SO:0001217, UniParc:UPI0003912372, UniRef:UniRef100_A0A0D8WHE9, UniRef:UniRef50_C1J8L6, UniRef:UniRef90_Q79JX1
contig_1	cds	115513	115950	-	17043192_00695	pilM	PilM	RefSeq:WP_021532695.1, SO:0001217, UniParc:UPI000390F3F0, UniRef:UniRef100_A0A0D8WEZ7, UniRef:UniRef50_Q68JC9, UniRef:UniRef90_A0A0D8WEZ7
contig_1	cds	115955	117025	-	17043192_00700	tcpQ	TcpQ domain-containing protein	RefSeq:WP_029391919.1, SO:0001217, UniParc:UPI00041900B9, UniRef:UniRef100_A0A172ESK5, UniRef:UniRef50_A0A2S1J8V8, UniRef:UniRef90_A0A2S1J8V8
contig_1	cds	117147	117542	+	17043192_00705		DUF3961 domain-containing protein	RefSeq:WP_029391920.1, SO:0001217, UniParc:UPI0003DBEE24, UniRef:UniRef100_A0A3A3ES10, UniRef:UniRef50_A0A3A3ES10, UniRef:UniRef90_A0A3A3ES10
contig_1	cds	117543	117974	-	17043192_00710		DUF3397 domain-containing protein	SO:0001217, UniParc:UPI00039104E7, UniRef:UniRef100_A0A0D8WFB3, UniRef:UniRef50_A0A0D8WFB3, UniRef:UniRef90_A0A0D8WFB3
contig_1	cds	118047	118289	-	17043192_00715	pilI	Pilus assembly protein PilI	RefSeq:WP_021532691.1, SO:0001217, UniParc:UPI000390CB53, UniRef:UniRef100_A0A172ERH1, UniRef:UniRef50_A0A2H4UFH7, UniRef:UniRef90_A0A2H4UFH7
contig_1	cds	118566	119231	-	17043192_00720	traC	TraC	RefSeq:WP_029391921.1, SO:0001217, UniParc:UPI00040BF4AC, UniRef:UniRef100_A0A142CPB5, UniRef:UniRef50_S1QD78, UniRef:UniRef90_S1QD78
contig_1	cds	119373	120014	-	17043192_00725		NGN domain-containing protein	RefSeq:WP_077250484.1, SO:0001217, UniParc:UPI00040A2523, UniRef:UniRef100_A0A172DTN9, UniRef:UniRef50_L3Q9T0, UniRef:UniRef90_L3Q9T0
contig_1	ncRNA-region	120553	120702	+			Pseudoknot of the regulatory region of the repZ gene	RFAM:RF01087, SO:0005836

## Sheet: pSB18004_ST1286_IncK_133315bp
#Annotated with Bakta (v1.4.0): https://github.com/oschwengers/bakta
#Database (v3.1): https://doi.org/10.5281/zenodo.4247252
#Sequence Id	Type	Start	Stop	Strand	Locus Tag	Gene	Product	DbXrefs
contig_1	cds	1	873	+	GIKJIK_00005	repA	Replication initiation protein	SO:0001217, UniRef:UniRef50_P03066, UniRef:UniRef90_Q5K5Z7
contig_1	oriC	877	1233	?			origin of replication
contig_1	cds	1802	2131	+	GIKJIK_00010		Toxin-antitoxin system, antitoxin component HigB	COG:COG4679, COG:X, RefSeq:WP_058649688.1, SO:0001217, UniParc:UPI0007356FD7, UniRef:UniRef100_A0A726QFA3, UniRef:UniRef50_W3V5K2, UniRef:UniRef90_A0A3G4RIX7
contig_1	cds	2112	2393	+	GIKJIK_00015	hipB	DNA-binding protein	COG:COG1396, COG:K, RefSeq:WP_058649687.1, SO:0001217, UniParc:UPI000735152B, UniRef:UniRef100_A0A726QJ42, UniRef:UniRef50_A0A0J1XHR2, UniRef:UniRef90_A0A0J1XHR2
contig_1	cds	2413	2676	+	GIKJIK_00020		Plasmid stabilization protein	RefSeq:WP_058649686.1, SO:0001217, UniParc:UPI00073518F1, UniRef:UniRef100_A0A726QRX6, UniRef:UniRef50_A0A0M0TEB7, UniRef:UniRef90_H1ZXP7
contig_1	cds	2666	2779	+	GIKJIK_00025		hypothetical protein
contig_1	cds	2789	3997	-	GIKJIK_00030		IS4-like element ISVsa5 family transposase	RefSeq:WP_001352368.1, SO:0001217, UniParc:UPI000000E009, UniRef:UniRef100_Q6Q515, UniRef:UniRef50_Q6Q515, UniRef:UniRef90_Q6Q515
contig_1	ncRNA	3990	4059	+	GIKJIK_00035	RNA-OUT	RNA-OUT	RFAM:RF00240, SO:0000655
contig_1	cds	4049	4303	+	GIKJIK_00040		Type II toxin-antitoxin system RelE/ParE family toxin	SO:0001217, UniRef:UniRef50_A0A726TRD3, UniRef:UniRef90_A0A726TRD3
contig_1	cds	5169	6398	+	GIKJIK_00045		Glycosyltransferase	RefSeq:WP_089679467.1, SO:0001217, UniParc:UPI000B7CF7D6, UniRef:UniRef100_A0A726TQ15, UniRef:UniRef50_Q9S4K6, UniRef:UniRef90_A0A2Y0A5H6
contig_1	cds	6382	9933	+	GIKJIK_00050		Autotransporter outer membrane beta-barrel domain-containing protein	SO:0001217, UniRef:UniRef50_A0A6L9DIU6
contig_1	cds	10618	11037	+	GIKJIK_00055	insE	ECs1337 protein	COG:COG2963, COG:X, RefSeq:WP_004018134.1, SO:0001217, UniParc:UPI0002C9C960, UniRef:UniRef100_A0A2H5C9U4, UniRef:UniRef50_Q1RPL7, UniRef:UniRef90_Q1RPL7
contig_1	cds	11034	11384	+	GIKJIK_00060		Acetaldehyde dehydrogenase	COG:COG3436, COG:X, RefSeq:WP_001405209.1, SO:0001217, UniParc:UPI0002A123FC, UniRef:UniRef100_A0A2H5C9S8, UniRef:UniRef50_A0A193M273, UniRef:UniRef90_A0A193M273
contig_1	cds	11415	13028	+	GIKJIK_00065	tnp-IS66	IS66 family transposase	RefSeq:WP_020833632.1, SO:0001217, UniParc:UPI00035908BA, UniRef:UniRef100_A0A2H5C9S1, UniRef:UniRef50_Q1R2U6, UniRef:UniRef90_A0A2U9LEX7
contig_1	cds	13108	14460	+	GIKJIK_00070	tnp-IS21	IS21 family transposase	SO:0001217, UniRef:UniRef50_E0WGZ7, UniRef:UniRef90_E0WGZ7
contig_1	cds	14437	16233	-	GIKJIK_00075		TnpA (Tn3)	SO:0001217, UniParc:UPI0000D7E4B7, UniRef:UniRef100_A0A075M8P0, UniRef:UniRef50_A0A075M8P0, UniRef:UniRef90_A0A075M8P0
contig_1	cds	16722	17606	+	GIKJIK_00080		Drug/metabolite transporter	RefSeq:WP_000058717.1, SO:0001217, UniParc:UPI00001A96B0, UniRef:UniRef100_Q6SJ76, UniRef:UniRef50_Q6SJ76, UniRef:UniRef90_Q6SJ76
contig_1	cds	17638	18837	-	GIKJIK_00085	tet(A)	tetracycline efflux MFS transporter Tet(A)	COG:COG2814, COG:G, GO:0005886, GO:0006811, GO:0015297, GO:0016021, GO:0042910, GO:0046677, NCBIProtein:WP_000804064.1, RefSeq:WP_000804064.1, SO:0001217, UniParc:UPI000000172C, UniRef:UniRef100_P02982, UniRef:UniRef50_P02982, UniRef:UniRef90_P02982
contig_1	cds	18916	19593	+	GIKJIK_00090	tetR(A)	tetracycline resistance transcriptional repressor TetR(A)	COG:COG1309, COG:K, GO:0003677, GO:0045892, GO:0046677, GO:0046872, RefSeq:WP_000470728.1, SO:0001217, UniParc:UPI000005D507, UniRef:UniRef100_P03038, UniRef:UniRef50_P03038, UniRef:UniRef90_P03038
contig_1	cds	19925	22891	-	GIKJIK_00095		Tn3-like element TnAs1 family transposase	GO:0003677, GO:0004803, GO:0006313, RefSeq:WP_001138014.1, SO:0001217, UniParc:UPI00002C271E, UniRef:UniRef100_Q6EMD4, UniRef:UniRef50_P06695, UniRef:UniRef90_P06695
contig_1	cds	22895	23455	-	GIKJIK_00100	tnpR	Transposons Tn4653 resolvase	GO:0000150, GO:0003677, GO:0015074, RefSeq:WP_001161490.1, SO:0001217, UniParc:UPI000000D431, UniRef:UniRef100_P0C1G2, UniRef:UniRef50_P06691, UniRef:UniRef90_P06691
contig_1	cds	23631	23831	-	GIKJIK_00105	tnpM	Transposon Tn21 modulator protein	RefSeq:WP_000993264.1, SO:0001217, UniParc:UPI000165FFFD, UniRef:UniRef100_P04162, UniRef:UniRef50_P04162, UniRef:UniRef90_P04162
contig_1	cds	24184	25197	-	GIKJIK_00110	intI1	class 1 integron integrase IntI1	COG:COG4974, COG:L, GO:0003677, GO:0006310, GO:0015074, GO:0044826, GO:0046718, GO:0075713, RefSeq:WP_000845048.1, SO:0001217, UniParc:UPI0000000166, UniRef:UniRef100_P62590, UniRef:UniRef50_P62590, UniRef:UniRef90_P62590
contig_1	ncRNA-region	25287	25358	+			putative aminoglycoside riboswitch / attI site	RFAM:RF02912, SO:0000035
contig_1	sorf	25299	25337	+	GIKJIK_00115	estX	Streptothricin acetyl transferase	SO:0001217, UniParc:UPI00000B6A7E, UniRef:UniRef100_A9QNW9, UniRef:UniRef50_A0A2R4A7Q1, UniRef:UniRef90_A5JS94
contig_1	cds	25354	25827	+	GIKJIK_00120	dfrA1	trimethoprim-resistant dihydrofolate reductase DfrA1	EC:1.5.1.3, GO:0004146, GO:0006545, GO:0006730, GO:0031427, GO:0046654, GO:0046677, GO:0050661, NCBIProtein:WP_000777555.1, RefSeq:WP_000777555.1, SO:0001217, UniParc:UPI00000014D1, UniRef:UniRef100_Q79IE7, UniRef:UniRef50_P00382, UniRef:UniRef90_P00382
contig_1	cds	25932	26276	+	GIKJIK_00125		Streptomycin 3''-adenylyltransferase	SO:0001217, UniParc:UPI0002A24601, UniRef:UniRef100_A0A2H5BYS4, UniRef:UniRef50_A0A2H5BYS4, UniRef:UniRef90_A0A2H5BYS4
contig_1	cds	26371	27231	-	GIKJIK_00130	blaTEM-1	class A broad-spectrum beta-lactamase TEM-1	EC:3.5.2.6, GO:0008800, GO:0030655, GO:0046677, NCBIProtein:WP_000027057.1, RefSeq:WP_000027057.1, SO:0001217, UniParc:UPI00000000E4, UniRef:UniRef100_P62593, UniRef:UniRef50_P62593, UniRef:UniRef90_P62593
contig_1	cds	27414	27971	-	GIKJIK_00135	tnpR	Transposon Tn1331 resolvase	COG:COG1961, COG:L, GO:0000150, GO:0003677, GO:0015074, RefSeq:WP_001235713.1, SO:0001217, UniParc:UPI00001A3763, UniRef:UniRef100_D9Z4Z5, UniRef:UniRef50_P21424, UniRef:UniRef90_P21424
contig_1	cds	28135	31140	+	GIKJIK_00140		Tn3-like element Tn3 family transposase	COG:COG4644, COG:X, RefSeq:WP_001143760.1, SO:0001217, UniParc:UPI00001A3762, UniRef:UniRef100_G1CCP5, UniRef:UniRef50_P03008, UniRef:UniRef90_Q0H0C2
contig_1	cds	31137	31586	-	GIKJIK_00145		Putative transposase	SO:0001217, UniParc:UPI00039180D1, UniRef:UniRef100_A0A2H5BYR5, UniRef:UniRef50_A0A455WHS9, UniRef:UniRef90_I6D9U3
contig_1	cds	31567	31839	-	GIKJIK_00150		hypothetical protein	RefSeq:WP_000019163.1, SO:0001217, UniParc:UPI00005AACF3, UniRef:UniRef100_W0FTF1, UniRef:UniRef50_A0A0D7G3Q7, UniRef:UniRef90_A0A0D7G3Q7
contig_1	cds	32054	32869	+	GIKJIK_00155	sul2	sulfonamide-resistant dihydropteroate synthase Sul2	EC:2.5.1.15, GO:0004156, GO:0046654, GO:0046656, GO:0046872, NCBIProtein:WP_001043260.1, RefSeq:WP_001043260.1, SO:0001217, UniParc:UPI0000000350, UniRef:UniRef100_P0AC11, UniRef:UniRef50_P0AC11, UniRef:UniRef90_P0AC11
contig_1	cds	32956	33258	+	GIKJIK_00160	manB	Glm	COG:COG1109, COG:G, RefSeq:WP_000251875.1, SO:0001217, UniParc:UPI000018F996, UniRef:UniRef100_Q6EZF2, UniRef:UniRef50_Q6EZF2, UniRef:UniRef90_Q6EZF2
contig_1	cds	33434	34570	-	GIKJIK_00165		Zn-Tnp-IS91 domain-containing protein	SO:0001217, UniParc:UPI00000B8331, UniRef:UniRef100_Q9F8W3, UniRef:UniRef50_A0A521FDE7, UniRef:UniRef90_A0A2S1JAR4
contig_1	cds	34937	35206	+	GIKJIK_00170	putA1	YacA	COG:COG3905, COG:K, RefSeq:WP_000079941.1, SO:0001217, UniParc:UPI00004E5742, UniRef:UniRef100_Q2TU21, UniRef:UniRef50_A0A0M1UIE1, UniRef:UniRef90_A0A0M1UIE1
contig_1	cds	35203	35484	+	GIKJIK_00175		Addiction module toxin RelE	RefSeq:WP_000970007.1, SO:0001217, UniParc:UPI00000BB02C, UniRef:UniRef100_W0LWB3, UniRef:UniRef50_E9LLH3, UniRef:UniRef90_W0LWB3
contig_1	cds	35524	36372	+	GIKJIK_00180		3'-5' exonuclease	RefSeq:WP_021265674.1, SO:0001217, UniParc:UPI0003AC9459, UniRef:UniRef100_W0LW29, UniRef:UniRef50_A0A0D6IZ33, UniRef:UniRef90_A0A0D6IZ33
contig_1	cds	36489	36962	+	GIKJIK_00185		YadA	RefSeq:WP_001334658.1, SO:0001217, UniParc:UPI00017A2C67, UniRef:UniRef100_A0A288XFT7, UniRef:UniRef50_E2GHG0, UniRef:UniRef90_E2GHG0
contig_1	cds	37097	37330	+	GIKJIK_00190		YaeA	RefSeq:WP_001334656.1, SO:0001217, UniParc:UPI00000BC96A, UniRef:UniRef100_W0LZZ1, UniRef:UniRef50_W0LZZ1, UniRef:UniRef90_W0LZZ1
contig_1	cds	37439	37708	-	GIKJIK_00195		YaeB protein	SO:0001217, UniRef:UniRef50_A0A1Q2TBR5, UniRef:UniRef90_A0A086VEG2
contig_1	cds	37705	38199	-	GIKJIK_00200		YafA	RefSeq:WP_001459505.1, SO:0001217, UniParc:UPI00000B0DA3, UniRef:UniRef100_W0M0Z2, UniRef:UniRef50_A0A709KQZ9, UniRef:UniRef90_A0A709KQZ9
contig_1	cds	38255	38857	-	GIKJIK_00205		FinO conjugation repressor	RefSeq:WP_000517695.1, SO:0001217, UniParc:UPI00000BAC1C, UniRef:UniRef100_W0M036, UniRef:UniRef50_U5KKA1, UniRef:UniRef90_U5KKA1
contig_1	cds	39211	40557	+	GIKJIK_00210		YagA	RefSeq:WP_001132032.1, SO:0001217, UniParc:UPI00000B4731, UniRef:UniRef100_A0A0G4DCV4, UniRef:UniRef50_C6K7P8, UniRef:UniRef90_C7S9Z7
contig_1	cds	40836	42716	+	GIKJIK_00215	cib	Colicin-Ib	GO:0016021, GO:0019835, GO:0033644, GO:0050829, RefSeq:WP_001283341.1, SO:0001217, UniParc:UPI00016BF2EB, UniRef:UniRef100_W0LWJ7, UniRef:UniRef50_P06716, UniRef:UniRef90_P04479
contig_1	cds	42734	43081	-	GIKJIK_00220		Colicin-Ib immunity protein	GO:0005886, GO:0015643, GO:0016021, GO:0030153, RefSeq:WP_000762570.1, SO:0001217, UniParc:UPI000000008E, UniRef:UniRef100_P08702, UniRef:UniRef50_P08702, UniRef:UniRef90_P08702
contig_1	cds	43200	43697	+	GIKJIK_00225		DUF6404 domain-containing protein	SO:0001217, UniParc:UPI000807EE29, UniRef:UniRef100_A0A2H5BYQ4, UniRef:UniRef50_V9SFF4, UniRef:UniRef90_V9SFF4
contig_1	cds	43569	44159	-	GIKJIK_00230		YdeA	RefSeq:WP_000194553.1, SO:0001217, UniParc:UPI00016BF19C, UniRef:UniRef100_A0A075UJP6, UniRef:UniRef50_A0A097SR87, UniRef:UniRef90_A0A097SR87
contig_1	cds	44159	44416	-	GIKJIK_00235		YdfA	RefSeq:WP_000371888.1, SO:0001217, UniParc:UPI0001DB93A3, UniRef:UniRef100_I6ZU30, UniRef:UniRef50_C8CGI5, UniRef:UniRef90_E9LLK1
contig_1	cds	44767	45768	+	GIKJIK_00240		SeT2	RefSeq:WP_000774874.1, SO:0001217, UniParc:UPI00016BF19A, UniRef:UniRef100_W0M0B8, UniRef:UniRef50_A0A1P8VPQ9, UniRef:UniRef90_A0A1P8VPQ9
contig_1	cds	45944	46288	-	GIKJIK_00245		Abortive infection protein	RefSeq:WP_000793307.1, SO:0001217, UniParc:UPI00000B826D, UniRef:UniRef100_W0LWB8, UniRef:UniRef50_A0A2H5C908, UniRef:UniRef90_W0LWB8
contig_1	cds	46787	47041	-	GIKJIK_00250		CDS10	RefSeq:WP_000678527.1, SO:0001217, UniParc:UPI000169F870, UniRef:UniRef100_H9XP65, UniRef:UniRef50_H9XP65, UniRef:UniRef90_H9XP65
contig_1	cds	47086	48012	-	GIKJIK_00255		CDS11	RefSeq:WP_001290416.1, SO:0001217, UniParc:UPI00016BF199, UniRef:UniRef100_H9XP66, UniRef:UniRef50_H9XP66, UniRef:UniRef90_H9XP66
contig_1	cds	48544	48957	+	GIKJIK_00260		YedA protein	RefSeq:WP_000465043.1, SO:0001217, UniParc:UPI0000EBBF9A, UniRef:UniRef100_Q2VNX6, UniRef:UniRef50_A0A023UFL4, UniRef:UniRef90_A0A023UFL4
contig_1	cds	48959	49738	+	GIKJIK_00265		Tyrosine recombinase XerD	RefSeq:WP_021537353.1, SO:0001217, UniParc:UPI000390CE63, UniRef:UniRef100_A0A6D1P2I1, UniRef:UniRef50_A0A381KSH1, UniRef:UniRef90_A0A6D1P2I1
contig_1	cds	49918	50562	+	GIKJIK_00270		Plasmid partitioning and stability protein	RefSeq:WP_001144036.1, SO:0001217, UniParc:UPI0000599210, UniRef:UniRef100_W0FFL3, UniRef:UniRef50_E6WNN5, UniRef:UniRef90_D3H584
contig_1	cds	50649	50957	+	GIKJIK_00275		Molecular chaperone GroEL	RefSeq:WP_000030199.1, SO:0001217, UniParc:UPI00000B01AF, UniRef:UniRef100_A0A023UDR1, UniRef:UniRef50_A0A023UDR1, UniRef:UniRef90_A0A023UDR1
contig_1	cds	51371	52351	+	GIKJIK_00280		Plasmid partition protein	RefSeq:WP_000688514.1, SO:0001217, UniParc:UPI00000BB7D1, UniRef:UniRef100_A0A1P8VPT0, UniRef:UniRef50_Q2VNZ8, UniRef:UniRef90_A0A0B1K6L8
contig_1	cds	52344	52760	+	GIKJIK_00285		ParB protein	RefSeq:WP_001278818.1, SO:0001217, UniParc:UPI00000B7AFD, UniRef:UniRef100_E9LLV2, UniRef:UniRef50_E9LLV2, UniRef:UniRef90_E9LLV2
contig_1	cds	52762	54036	-	GIKJIK_00290	impB	Protein ImpB	GO:0003684, GO:0006281, GO:0009432, RefSeq:WP_000457492.1, SO:0001217, UniParc:UPI000000008F, UniRef:UniRef100_P18642, UniRef:UniRef50_P18642, UniRef:UniRef90_P18642
contig_1	cds	54036	54473	-	GIKJIK_00295	impA	Protein ImpA	EC:3.4.21.-, GO:0003677, GO:0006281, GO:0006355, GO:0008236, GO:0009432, RefSeq:WP_000109071.1, SO:0001217, UniParc:UPI0000000090, UniRef:UniRef100_Q7M1C0, UniRef:UniRef50_Q7M1C0, UniRef:UniRef90_Q7M1C0
contig_1	cds	54470	54718	-	GIKJIK_00300	impC	Protein ImpC	GO:0006281, RefSeq:WP_000618110.1, SO:0001217, UniParc:UPI000000111C, UniRef:UniRef100_P0A1G1, UniRef:UniRef50_P0A1G1, UniRef:UniRef90_P0A1G1
contig_1	cds	55112	56038	+	GIKJIK_00305		DUF1281 domain-containing protein	RefSeq:WP_001134395.1, SO:0001217, UniParc:UPI00000B19CB, UniRef:UniRef100_A0A0G4DBT1, UniRef:UniRef50_B6IC13, UniRef:UniRef90_B6IC13
contig_1	cds	56035	56346	+	GIKJIK_00310	yubC	Uncharacterized protein YubC	RefSeq:WP_010891263.1, SO:0001217, UniParc:UPI00000B2838, UniRef:UniRef100_A0A1P8VPT2, UniRef:UniRef50_Q1R1W4, UniRef:UniRef90_Q1R1W4
contig_1	cds	56423	57106	+	GIKJIK_00315		Methyltransferase	RefSeq:WP_000086178.1, SO:0001217, UniParc:UPI00000B87FE, UniRef:UniRef100_A0A061KA45, UniRef:UniRef50_Q9S4X2, UniRef:UniRef90_A0A061KA45
contig_1	cds	57107	57328	+	GIKJIK_00320		hypothetical protein	RefSeq:WP_001104887.1, SO:0001217, UniParc:UPI00000BEFBD, UniRef:UniRef100_A0A163HSW5, UniRef:UniRef50_E2GHH3, UniRef:UniRef90_A0A093DB27
contig_1	cds	57340	57774	+	GIKJIK_00325		DUF1380 domain-containing protein	RefSeq:WP_000274403.1, SO:0001217, UniParc:UPI00000B01A8, UniRef:UniRef100_A0A061K520, UniRef:UniRef50_A0A478GG22, UniRef:UniRef90_A0A061K520
contig_1	cds	57774	58595	+	GIKJIK_00330		YchA	SO:0001217, UniParc:UPI00017A8BEA, UniRef:UniRef100_A0A075MFA7, UniRef:UniRef50_Q9S4W9, UniRef:UniRef90_Q6SJ53
contig_1	cds	59013	59438	+	GIKJIK_00335		Antirestriction protein	RefSeq:WP_001198886.1, SO:0001217, UniParc:UPI00000B287B, UniRef:UniRef100_A0A069FPX5, UniRef:UniRef50_A0A069FPX5, UniRef:UniRef90_A0A069FPX5
contig_1	cds	59485	59907	+	GIKJIK_00340		DNA methylase	RefSeq:WP_000271729.1, SO:0001217, UniParc:UPI00000BC51E, UniRef:UniRef100_A0A2S1PPM1, UniRef:UniRef50_E2GHH9, UniRef:UniRef90_A0A3K0WHF7
contig_1	cds	59904	60095	+	GIKJIK_00345		Plasmid protein	RefSeq:WP_001027500.1, SO:0001217, UniParc:UPI00000B5E10, UniRef:UniRef100_A0A061K9N4, UniRef:UniRef50_Q1A2M1, UniRef:UniRef90_Q849V8
contig_1	cds	60843	61370	+	GIKJIK_00350	ssb	Single-stranded DNA-binding protein	RefSeq:WP_029391983.1, SO:0001217, UniParc:UPI0003E3B787, UniRef:UniRef100_W0LZS5, UniRef:UniRef50_C1J8I1, UniRef:UniRef90_A0A2X1NM79
contig_1	cds	61428	61661	+	GIKJIK_00355	yubL	UPF0401 protein YubL	RefSeq:WP_021534894.1, SO:0001217, UniParc:UPI000391857F, UniRef:UniRef100_W0M0T5, UniRef:UniRef50_Q9JMR3, UniRef:UniRef90_Q1R1U5
contig_1	cds	61725	63683	+	GIKJIK_00360	yubM	Uncharacterized protein YubM	COG:COG1475, COG:D, GO:0003677, RefSeq:WP_029391984.1, SO:0001217, UniParc:UPI0003DDD609, UniRef:UniRef100_A0A172DTA0, UniRef:UniRef50_Q9ZGR8, UniRef:UniRef90_Q9ZGR8
contig_1	cds	63738	64172	+	GIKJIK_00365	psiB	Plasmid SOS inhibition protein B	RefSeq:WP_029391985.1, SO:0001217, UniParc:UPI0003DC2DC4, UniRef:UniRef100_A0A0D8W7D3, UniRef:UniRef50_Q7B1W3, UniRef:UniRef90_A0A0B1MHP8
contig_1	cds	64169	64888	+	GIKJIK_00370		Plasmid SOS inhibition protein A	RefSeq:WP_001276270.1, SO:0001217, UniParc:UPI000049F17A, UniRef:UniRef100_C1J8T1, UniRef:UniRef50_C1J8T1, UniRef:UniRef90_C1J8T1
contig_1	cds	64885	65481	+	GIKJIK_00375		YgaA	RefSeq:WP_029391986.1, SO:0001217, UniParc:UPI0003DDA953, UniRef:UniRef100_A0A152XU67, UniRef:UniRef50_E0J399, UniRef:UniRef90_E0J399
contig_1	cds	65946	66446	+	GIKJIK_00380		Antirestriction protein	RefSeq:WP_000117633.1, SO:0001217, UniParc:UPI0002A3669E, UniRef:UniRef100_A0A0L6XRJ0, UniRef:UniRef50_A0A075UIQ7, UniRef:UniRef90_A0A075UIQ7
contig_1	cds	66448	67056	-	GIKJIK_00385		hypothetical protein	RefSeq:WP_170852529.1, SO:0001217, UniParc:UPI00078C9792, UniRef:UniRef100_A0A142CP95, UniRef:UniRef50_A0A142CP95, UniRef:UniRef90_A0A142CP95
contig_1	cds	67175	67609	+	GIKJIK_00390		YgcA	RefSeq:WP_029392001.1, SO:0001217, UniParc:UPI00041E49CA, UniRef:UniRef100_A0A3A3E2G8, UniRef:UniRef50_E9LMH1, UniRef:UniRef90_A0A8A4S048
contig_1	cds	67701	67967	+	GIKJIK_00395		YDFB protein	RefSeq:WP_001247862.1, SO:0001217, UniParc:UPI00000BB15D, UniRef:UniRef100_Q7B1W6, UniRef:UniRef50_Q7B1W6, UniRef:UniRef90_Q7B1W6
contig_1	cds	68032	68949	+	GIKJIK_00400		Transposase	RefSeq:WP_029392002.1, SO:0001217, UniParc:UPI0003DB7BDB, UniRef:UniRef100_W1F7I9, UniRef:UniRef50_T1PXX4, UniRef:UniRef90_A0A6D1P3N0
contig_1	cds	69011	69181	+	GIKJIK_00405		hypothetical protein	SO:0001217, UniRef:UniRef50_A0A1E2VPW1, UniRef:UniRef90_UPI0007FB2ACF
contig_1	cds	69212	69463	-	GIKJIK_00410		Helix-turn-helix transcriptional regulator	RefSeq:WP_000148285.1, SO:0001217, UniParc:UPI00000B0833, UniRef:UniRef100_C1J8S2, UniRef:UniRef50_A0A3G4RTT3, UniRef:UniRef90_C1J8S2
contig_1	cds	69497	69799	-	GIKJIK_00415		hypothetical protein	RefSeq:WP_166783726.1, SO:0001217, UniParc:UPI0003DD9931, UniRef:UniRef100_A0A142CPJ0, UniRef:UniRef50_A0A090NCW1, UniRef:UniRef90_A0A376MGV9
contig_1	cds	70043	70891	+	GIKJIK_00420		DUF4942 domain-containing protein	RefSeq:WP_021532736.1, SO:0001217, UniParc:UPI000390A732, UniRef:UniRef100_A0A2X9WI86, UniRef:UniRef50_E0J392, UniRef:UniRef90_E0J392
contig_1	cds	70977	71312	-	GIKJIK_00425		Mobility protein C	RefSeq:WP_000157103.1, SO:0001217, UniParc:UPI0002BA2CD6, UniRef:UniRef100_A0A7U1E0K8, UniRef:UniRef50_Q3ZU63, UniRef:UniRef90_Q3ZU63
contig_1	oriT	71430	71517	?			origin of transfer
contig_1	cds	71545	71877	+	GIKJIK_00430		Relaxosome component	RefSeq:WP_001291058.1, SO:0001217, UniParc:UPI0001DB94C3, UniRef:UniRef100_A0A2H4UFE7, UniRef:UniRef50_C7SA35, UniRef:UniRef90_B7LIM5
contig_1	cds	71889	74609	+	GIKJIK_00435		Endonuclease relaxase	RefSeq:WP_029391987.1, SO:0001217, UniParc:UPI0003FA60B3, UniRef:UniRef100_A0A2H5C199, UniRef:UniRef50_A0A075ME82, UniRef:UniRef90_E0WGZ0
contig_1	cds	74830	77130	-	GIKJIK_00440		TraG-D-C domain-containing protein	RefSeq:WP_029392471.1, SO:0001217, UniParc:UPI0004201011, UniRef:UniRef100_A0A2H5C181, UniRef:UniRef50_A0A0J1PVM5, UniRef:UniRef90_A0A0F6YSX4
contig_1	cds	77111	78229	-	GIKJIK_00445		Thiol:disulfide interchange protein	RefSeq:WP_029391999.1, SO:0001217, UniParc:UPI0003DC92DB, UniRef:UniRef100_A0A2H5C9N6, UniRef:UniRef50_E0WGZ2, UniRef:UniRef90_Q7WUB5
contig_1	cds	78226	79569	-	GIKJIK_00450		Conjugal transfer protein TrbA	RefSeq:WP_172686572.1, SO:0001217, UniParc:UPI00078C4E92, UniRef:UniRef100_A0A142CPI2, UniRef:UniRef50_G4VU83, UniRef:UniRef90_G4VU83
contig_1	ncRNA	79720	79807	-	GIKJIK_00455	AgrB	ArsR-gov region gene B	RFAM:RF02891, SO:0000655
contig_1	cds	80026	80202	-	GIKJIK_00460		hypothetical protein	RefSeq:WP_032172741.1, SO:0001217, UniParc:UPI0003DC0836, UniRef:UniRef100_A0A826ZQA3, UniRef:UniRef50_C1J8Q7, UniRef:UniRef90_C1J8Q7
contig_1	cds	80353	80820	-	GIKJIK_00465		Endonuclease	RefSeq:WP_000598962.1, SO:0001217, UniParc:UPI00016C7D32, UniRef:UniRef100_C1J8Q6, UniRef:UniRef90_C1J8Q6
contig_1	cds	80923	81603	+	GIKJIK_00470		DNA-binding protein	SO:0001217, UniParc:UPI0001FB4EFE, UniRef:UniRef100_A0A148HHL5, UniRef:UniRef50_A0A0F6TW99, UniRef:UniRef90_C1J8Q5
contig_1	cds	81553	81804	-	GIKJIK_00475		Neurotensin receptor R8	SO:0001217, UniParc:UPI000390BDB9, UniRef:UniRef100_A0A0X5FIL8, UniRef:UniRef50_Q6KD38, UniRef:UniRef90_A0A0J2DU14
contig_1	cds	81801	82016	-	GIKJIK_00480		hypothetical protein	RefSeq:WP_000266543.1, SO:0001217, UniParc:UPI00000DF007, UniRef:UniRef100_A0A710FEV5, UniRef:UniRef50_A0A411H6E5, UniRef:UniRef90_A0A061L656
contig_1	cds	82020	82388	-	GIKJIK_00485		hypothetical protein	RefSeq:WP_029391948.1, SO:0001217, UniParc:UPI0004250363, UniRef:UniRef100_A0A172DTR3, UniRef:UniRef50_A0A2H4UFG6, UniRef:UniRef90_A0A2D0DEH2
contig_1	cds	82687	82929	-	GIKJIK_00490		hypothetical protein	RefSeq:WP_029391947.1, SO:0001217, UniParc:UPI000421E4E8, UniRef:UniRef100_A0A2H5C1A9, UniRef:UniRef50_L3CFD8, UniRef:UniRef90_A0A0D8WHW3
contig_1	ncRNA	83104	83260	+	GIKJIK_00495	sok	sok antitoxin (CssrC)	RFAM:RF01794, SO:0000655
contig_1	cds	83258	83410	+	GIKJIK_00500	pndA	Protein PndA	GO:0005886, GO:0016021, RefSeq:WP_021532728.1, SO:0001217, UniParc:UPI00039129E8, UniRef:UniRef100_A0A0X5FI04, UniRef:UniRef50_P11902, UniRef:UniRef90_P11902
contig_1	cds	83950	84159	+	GIKJIK_00505		HEAT repeat domain-containing protein	RefSeq:WP_000062946.1, SO:0001217, UniParc:UPI0003914889, UniRef:UniRef100_A0A0L6XSZ7, UniRef:UniRef50_W0LWF4, UniRef:UniRef90_A0A0L6XSZ7
contig_1	cds	84224	84877	-	GIKJIK_00510		Ethanolamine utilization protein EutE	RefSeq:WP_029391946.1, SO:0001217, UniParc:UPI000461A25D, UniRef:UniRef100_A0A2H5C136, UniRef:UniRef50_E0WH05, UniRef:UniRef90_E0WH05
contig_1	cds	84965	87130	-	GIKJIK_00515		Conjugal transfer integral membrane protein	RefSeq:WP_029391945.1, SO:0001217, UniParc:UPI0003DCAB95, UniRef:UniRef100_A0A220QJD0, UniRef:UniRef50_E0WH06, UniRef:UniRef90_E0WH06
contig_1	cds	87203	87772	-	GIKJIK_00520		Conjugal transfer protein	RefSeq:WP_000650755.1, SO:0001217, UniParc:UPI00001B5E3E, UniRef:UniRef100_Q7WUD1, UniRef:UniRef50_Q68J99, UniRef:UniRef90_Q68J99
contig_1	cds	87769	88974	-	GIKJIK_00525		Conjugal transfer protein	RefSeq:WP_029391944.1, SO:0001217, UniParc:UPI00041311D0, UniRef:UniRef100_A0A2H5C142, UniRef:UniRef50_A0A0J2D115, UniRef:UniRef90_A0A066QE53
contig_1	cds	88935	89552	-	GIKJIK_00530		Conjugal transfer protein TraV	RefSeq:WP_029391943.1, SO:0001217, UniParc:UPI0004176663, UniRef:UniRef100_A0A0D8WHG2, UniRef:UniRef50_W0FK51, UniRef:UniRef90_V5KBK0
contig_1	cds	89552	92596	-	GIKJIK_00535		ATP-binding protein	RefSeq:WP_029391942.1, SO:0001217, UniParc:UPI0003DC1E7C, UniRef:UniRef100_A0A2H5C137, UniRef:UniRef50_E9LML1, UniRef:UniRef90_A0A066QJA7
contig_1	cds	92772	93152	-	GIKJIK_00540		hypothetical protein	RefSeq:WP_000690886.1, SO:0001217, UniParc:UPI0002A2D7C2, UniRef:UniRef100_Q7WUD5, UniRef:UniRef50_A0A376MGH7, UniRef:UniRef90_A0A376MGH7
contig_1	cds	93152	93457	-	GIKJIK_00545		hypothetical protein	SO:0001217, UniRef:UniRef50_W1F6U0, UniRef:UniRef90_W1F6U0
contig_1	ncRNA-region	93593	93637	+			Guanidine-II riboswitch	RFAM:RF01068, SO:0000035
contig_1	cds	93656	93973	+	GIKJIK_00550	sugE	quaternary ammonium compound efflux SMR transporter SugE	RefSeq:WP_000118520.1, SO:0001217, UniParc:UPI000000076B, UniRef:UniRef100_Q79IF2, UniRef:UniRef90_Q79IF2
contig_1	cds	93970	94503	-	GIKJIK_00555	blc	Outer membrane lipoprotein Blc	COG:COG3040, COG:M, GO:0008289, GO:0009279, RefSeq:WP_001221666.1, SO:0001217, UniParc:UPI00001B4813, UniRef:UniRef100_B6VP23, UniRef:UniRef50_P0A902, UniRef:UniRef90_Q46036
contig_1	cds	94597	95742	-	GIKJIK_00560	blaCMY-2	class C beta-lactamase CMY-2	NCBIProtein:WP_000976514.1, RefSeq:WP_000976514.1, SO:0001217, UniParc:UPI00000BA718, UniRef:UniRef100_C4NUY1, UniRef:UniRef90_P05193
contig_1	cds	96066	97328	-	GIKJIK_00565		IS1380-like element ISEc9 family transposase	RefSeq:WP_000608644.1, SO:0001217, UniParc:UPI00000B4557, UniRef:UniRef100_Q6SJ63, UniRef:UniRef50_Q6SJ63, UniRef:UniRef90_Q6SJ63
contig_1	cds	97425	97610	-	GIKJIK_00570		hypothetical protein	RefSeq:WP_029394194.1, SO:0001217, UniParc:UPI000460F9B6, UniRef:UniRef100_A0A890DKA6, UniRef:UniRef50_A0A6L6I8E7, UniRef:UniRef90_A0A890DKA6
contig_1	cds	97665	98291	-	GIKJIK_00575		Conjugal transfer protein TraT	SO:0001217, UniParc:UPI0002A2CFCD, UniRef:UniRef100_A0A172DTQ5, UniRef:UniRef50_C7SA49, UniRef:UniRef90_A0A6L6ZKM6
contig_1	cds	98398	98649	-	GIKJIK_00580		Plasmid conjugative transfer protein TraS	RefSeq:WP_021532719.1, SO:0001217, UniParc:UPI0003918763, UniRef:UniRef100_A0A7U1E160, UniRef:UniRef50_A0A2H4UFH5, UniRef:UniRef90_A0A2H4UFH5
contig_1	cds	98706	99104	-	GIKJIK_00585		Conjugal transfer protein TraR	RefSeq:WP_029391936.1, SO:0001217, UniParc:UPI0003DCA9EC, UniRef:UniRef100_A0A0D8WJN7, UniRef:UniRef50_V5KC75, UniRef:UniRef90_Q7WUD9
contig_1	cds	99151	99681	-	GIKJIK_00590		Conjugal transfer protein	RefSeq:WP_000987022.1, SO:0001217, UniParc:UPI0001E8D251, UniRef:UniRef100_V5KBY9, UniRef:UniRef50_V5KBY9, UniRef:UniRef90_Q68JA6
contig_1	cds	99678	100391	-	GIKJIK_00595		Conjugal transfer protein	RefSeq:WP_021532717.1, SO:0001217, UniParc:UPI0003917F66, UniRef:UniRef100_A0A0D8WMV3, UniRef:UniRef50_V5KCM6, UniRef:UniRef90_V5KCM6
contig_1	cds	100388	101719	-	GIKJIK_00600		Conjugal transfer protein TraO	SO:0001217, UniRef:UniRef50_Q6SJ63, UniRef:UniRef90_A0A2H5C118
contig_1	cds	101723	102697	-	GIKJIK_00605		Conjugal transfer protein TraN	RefSeq:WP_029391933.1, SO:0001217, UniParc:UPI0003F99E73, UniRef:UniRef100_A0A2H5C9W5, UniRef:UniRef50_W0LW82, UniRef:UniRef90_Q7WUE3
contig_1	cds	102708	103403	-	GIKJIK_00610		Conjugal transfer protein TraM	RefSeq:WP_029391932.1, SO:0001217, UniParc:UPI0003DDE85C, UniRef:UniRef100_A0A2U9HX21, UniRef:UniRef50_V5KC79, UniRef:UniRef90_V5KC79
contig_1	cds	103415	103765	-	GIKJIK_00615		Conjugal transfer protein	RefSeq:WP_021532713.1, SO:0001217, UniParc:UPI0003913298, UniRef:UniRef100_A0A0D8WJN4, UniRef:UniRef50_C7SA57, UniRef:UniRef90_C1J8N3
contig_1	cds	103782	105182	-	GIKJIK_00620		hypothetical protein
contig_1	cds	105146	107842	-	GIKJIK_00625		DNA primase	SO:0001217, UniRef:UniRef50_A0A7U1E1K3, UniRef:UniRef90_UPI00111B5496
contig_1	cds	107906	108196	-	GIKJIK_00630		Conjugal transfer protein	RefSeq:WP_000817799.1, SO:0001217, UniParc:UPI00001B5E2E, UniRef:UniRef100_Q7WUE7, UniRef:UniRef50_Q68JB3, UniRef:UniRef90_Q68JB3
contig_1	cds	108193	109341	-	GIKJIK_00635	traJ	ATP-binding protein	RefSeq:WP_000625247.1, SO:0001217, UniParc:UPI00001B5E2D, UniRef:UniRef100_Q7WUE8, UniRef:UniRef50_D9Z522, UniRef:UniRef90_Q7WUE8
contig_1	cds	109325	110161	-	GIKJIK_00640		Conjugal transfer protein	RefSeq:WP_029391930.1, SO:0001217, UniParc:UPI0003DD1247, UniRef:UniRef100_A0A2H5C155, UniRef:UniRef50_Q7WUE9, UniRef:UniRef90_Q7WUE9
contig_1	cds	110158	110610	-	GIKJIK_00645		Conjugative transfer protein TraH	RefSeq:WP_001081199.1, SO:0001217, UniParc:UPI00022442C9, UniRef:UniRef100_A0A075MDW6, UniRef:UniRef50_A0A3V7Z0Y4, UniRef:UniRef90_Q7WUF0
contig_1	cds	110659	110829	-	GIKJIK_00650		hypothetical protein	RefSeq:WP_001597011.1, SO:0001217, UniParc:UPI0002A2323E, UniRef:UniRef100_A0A075MFK4, UniRef:UniRef50_W5VGQ4, UniRef:UniRef90_W5VGQ4
contig_1	cds	110969	112171	-	GIKJIK_00655		Conjugal transfer protein TraF	RefSeq:WP_029391929.1, SO:0001217, UniParc:UPI0003DC637E, UniRef:UniRef100_A0A2H5C108, UniRef:UniRef50_C1J8M7, UniRef:UniRef90_C1J8M7
contig_1	cds	112261	113082	-	GIKJIK_00660		Conjugal transfer protein TraE	RefSeq:WP_000804089.1, SO:0001217, UniParc:UPI0002636E49, UniRef:UniRef100_A0A0H0LAG8, UniRef:UniRef50_W0FFG7, UniRef:UniRef90_V5KBL7
contig_1	cds	113333	113878	-	GIKJIK_00665		TraD	RefSeq:WP_029391928.1, SO:0001217, UniParc:UPI0003DCFB3C, UniRef:UniRef100_A0A2H5C9T9, UniRef:UniRef50_A0A220QIF8, UniRef:UniRef90_A0A220QIF8
contig_1	cds	113997	114278	-	GIKJIK_00670		hypothetical protein	RefSeq:WP_029391927.1, SO:0001217, UniParc:UPI0004619515, UniRef:UniRef100_A0A0X5FI28, UniRef:UniRef50_V5KBV6, UniRef:UniRef90_A0A0X5FI28
contig_1	cds	114319	115488	-	GIKJIK_00675		Site-specific DNA recombinase	RefSeq:WP_029391926.1, SO:0001217, UniParc:UPI0003DC90BF, UniRef:UniRef100_A0A2H5C112, UniRef:UniRef50_P10487, UniRef:UniRef90_A0A160HRB0
contig_1	cds	115917	116057	-	GIKJIK_00680		hypothetical protein	RefSeq:WP_021511764.1, SO:0001217, UniParc:UPI0003913EE5, UniRef:UniRef100_A0A142CPD1, UniRef:UniRef50_A0A142CPD1, UniRef:UniRef90_A0A142CPD1
contig_1	cds	116276	116389	+	GIKJIK_00685		Shufflon protein B	SO:0001217, UniParc:UPI00050A7A7F, UniRef:UniRef100_A0A831HL10, UniRef:UniRef50_C1J8M4, UniRef:UniRef90_A0A172DU14
contig_1	cds	116340	116495	+	GIKJIK_00690		hypothetical protein	SO:0001217, UniParc:UPI000AADB2EC, UniRef:UniRef100_A0A6M4P715, UniRef:UniRef50_A0A6M4P715, UniRef:UniRef90_A0A6M4P715
contig_1	cds	116912	117244	-	GIKJIK_00695		Shufflon protein C	SO:0001217, UniRef:UniRef50_A0A5E9YVU4, UniRef:UniRef90_A0A3P1RAG5
contig_1	cds	117626	118918	-	GIKJIK_00700		Minor pilin subunit	SO:0001217, UniRef:UniRef50_C1J8M4
contig_1	cds	118915	119622	-	GIKJIK_00705		Peptidase-A24 domain-containing protein	RefSeq:WP_202110611.1, SO:0001217, UniParc:UPI0007DE2208, UniRef:UniRef100_A0A172DTE5, UniRef:UniRef50_A0A0A0GVX9, UniRef:UniRef90_A0A2S1J8Q7
contig_1	cds	119582	120058	-	GIKJIK_00710		Lytic transglycosylase	RefSeq:WP_029391914.1, SO:0001217, UniParc:UPI0003DDC451, UniRef:UniRef100_A0A0X5FIA3, UniRef:UniRef50_L3Q828, UniRef:UniRef90_D9CGV5
contig_1	cds	120117	120653	-	GIKJIK_00715		Major pillin subunit	RefSeq:WP_029391915.1, SO:0001217, UniParc:UPI000405E069, UniRef:UniRef100_A0A2H5C9K9, UniRef:UniRef50_G4VUC9, UniRef:UniRef90_A0A0D8VVV8
contig_1	cds	120704	121804	-	GIKJIK_00720		Type IV pilus integral inner membrane protein	RefSeq:WP_029391916.1, SO:0001217, UniParc:UPI00042728B0, UniRef:UniRef100_A0A172DTF8, UniRef:UniRef50_G4VUD0, UniRef:UniRef90_B7LIT2
contig_1	cds	121806	123314	-	GIKJIK_00725		ATPase	RefSeq:WP_021532701.1, SO:0001217, UniParc:UPI00039120E1, UniRef:UniRef100_A0A0X5FI36, UniRef:UniRef50_H1ZXY5, UniRef:UniRef90_Q932T7
contig_1	cds	123411	124007	-	GIKJIK_00730		hypothetical protein	RefSeq:WP_029391917.1, SO:0001217, UniParc:UPI0003F98937, UniRef:UniRef100_A0A2S1J922, UniRef:UniRef50_A0A2T3TAX2, UniRef:UniRef90_A0A0D8WH26
contig_1	cds	124103	124657	-	GIKJIK_00735		hypothetical protein	RefSeq:WP_021532699.1, SO:0001217, UniParc:UPI000390F95E, UniRef:UniRef100_A0A0L6XSL4, UniRef:UniRef50_A0A0A0GQX8, UniRef:UniRef90_A0A0L6XSL4
contig_1	cds	124706	125158	-	GIKJIK_00740	pilP	Pilus assembly protein PilP	RefSeq:WP_029391918.1, SO:0001217, UniParc:UPI0003DB69D6, UniRef:UniRef100_A0A172DT69, UniRef:UniRef50_A0A2H4UFK0, UniRef:UniRef90_A0A2H4UFK0
contig_1	cds	125148	126443	-	GIKJIK_00745		Pilus assembly protein	RefSeq:WP_021532697.1, SO:0001217, UniParc:UPI000390E260, UniRef:UniRef100_A0A0D8WFB9, UniRef:UniRef50_A0A0J2DU58, UniRef:UniRef90_A0A5E9SR08
contig_1	cds	126464	128083	-	GIKJIK_00750		Bundle-forming pilus B	RefSeq:WP_021532696.1, SO:0001217, UniParc:UPI0003912372, UniRef:UniRef100_A0A0D8WHE9, UniRef:UniRef50_C1J8L6, UniRef:UniRef90_A0A066QB06
contig_1	cds	128114	128551	-	GIKJIK_00755		PilM	RefSeq:WP_021532695.1, SO:0001217, UniParc:UPI000390F3F0, UniRef:UniRef100_A0A0D8WEZ7, UniRef:UniRef50_Q68JC9, UniRef:UniRef90_A0A0D8WEZ7
contig_1	cds	128556	129626	-	GIKJIK_00760		TcpQ domain-containing protein	RefSeq:WP_029391919.1, SO:0001217, UniParc:UPI00041900B9, UniRef:UniRef100_A0A172ESK5, UniRef:UniRef50_L3CH08, UniRef:UniRef90_A0A2S1J8V8
contig_1	cds	129748	130143	+	GIKJIK_00765		hypothetical protein	RefSeq:WP_029391920.1, SO:0001217, UniParc:UPI0003DBEE24, UniRef:UniRef100_A0A3A3ES10, UniRef:UniRef50_A0A3A3ES10, UniRef:UniRef90_A0A3A3ES10
contig_1	cds	130144	130575	-	GIKJIK_00770		hypothetical protein	SO:0001217, UniParc:UPI00039104E7, UniRef:UniRef100_A0A0D8WFB3, UniRef:UniRef50_A0A0D8WFB3, UniRef:UniRef90_A0A0D8WFB3
contig_1	cds	130648	130890	-	GIKJIK_00775		PilI type IV pilus biogenesis protein	RefSeq:WP_021532691.1, SO:0001217, UniParc:UPI000390CB53, UniRef:UniRef100_A0A7T5XS91, UniRef:UniRef50_A0A7T5XS91, UniRef:UniRef90_A0A7T5XS91
contig_1	cds	131167	131832	-	GIKJIK_00780		Conjugal transfer protein C	RefSeq:WP_029391921.1, SO:0001217, UniParc:UPI00040BF4AC, UniRef:UniRef100_A0A142CPB5, UniRef:UniRef50_V5KCN5, UniRef:UniRef90_V5KCN5
contig_1	cds	131974	132615	-	GIKJIK_00785		TraB	RefSeq:WP_077250484.1, SO:0001217, UniParc:UPI00040A2523, UniRef:UniRef100_A0A172DTN9, UniRef:UniRef50_A0A3G4RQI5, UniRef:UniRef90_C1J8K9
contig_1	ncRNA-region	133154	133303	+			Pseudoknot of the regulatory region of the repZ gene	RFAM:RF01087, SO:0005836
