# Supplementary material for: Comparison of IncK-blaCMY-2 Plasmids in Extended-Spectrum Cephalosporin-Resistant Escherichia coli Isolated from Poultry and Humans in Denmark, Finland, and Germany
Source: Antibiotics (Basel). 2024 Apr 10;13(4):349. doi: 10.3390/antibiotics13040349 (PMC11047599; doi:10.3390/antibiotics13040349)
Supplement: Supplementary file 1 [file antibiotics-13-00349-s001.zip › Table S6. IncK plasmids - public and this study.xlsx]

## Sheet: Table S6
Plasmid name	year of isolate	Sample of origin	blaCMY-2	blaTEM-1	aac(3)-Via	aadA1	sul1	sul2	tet(A)	drfA1	cib	traT
p9P2	2016	broiler	blaCMY-2		aac(3)-Via	aadA1					cib	traT
p30P2	2017	broiler	blaCMY-2		aac(3)-Via	aadA1	sul1				cib	traT
p19P1	2016	broiler	blaCMY-2		aac(3)-Via	aadA1	sul1				cib	traT
p3P2	2016	broiler	blaCMY-2		aac(3)-Via	aadA1					cib	traT
p27P1	2017	broiler	blaCMY-2		aac(3)-Via	aadA1	sul1				cib	traT
p2	2017	broiler	blaCMY-2		aac(3)-Via	aadA1	sul1		tet(A)		cib	traT
pMS1170_1	2020	broiler	blaCMY-2		aac(3)-Via	aadA1	sul1		tet(A)		cib	traT
p25P1	2017	broiler	blaCMY-2		aac(3)-Via	aadA1	sul1				cib	traT
pESBL3310	2021	cow	blaCMY-2		aac(3)-Via	aadA1	sul1		tet(A)		cib	traT
p15P1	2016	broiler	blaCMY-2		aac(3)-Via	aadA1	sul1		tet(A)		cib	traT
p14P1	2016	broiler	blaCMY-2		aac(3)-Via	aadA1	sul1		tet(A)		cib	traT
pN16S065-2	2016	broiler	blaCMY-2		aac(3)-Via	aadA1	sul1				cib	traT
p22C121-2	2010	broiler	blaCMY-2		aac(3)-Via	aadA1	sul1				cib	traT
p20P2	2016	broiler	blaCMY-2								cib	traT
pZPK-H21	2021	goose	blaCMY-2									traT
p10P2	2016	broiler	blaCMY-2		aac(3)-Via	aadA1					cib	traT
p32P1	2017	broiler	blaCMY-2								cib	traT
p34P2	2018	broiler	blaCMY-2		aac(3)-Via	aadA1					cib	traT
pESBL3156	2021	broiler	blaCMY-2									traT
p65P2	2011	broiler	blaCMY-2									traT
p21C26-3	2009	broiler	blaCMY-2									traT
p23C63-1	2011	broiler	blaCMY-2									traT
p23C57-3	2011	broiler	blaCMY-2									traT
p19C56-2	2007	broiler	blaCMY-2									traT
pDV45	2013	retail chicken meat	blaCMY-2									traT
p4809.66	2011	clinical	blaCMY-2									traT
p17C9-3	2005	clinical	blaCMY-2									traT
p5312.29	2014	clinical	blaCMY-2									traT
p24C117-3	2012	broiler	blaCMY-2									traT
p22C48-3	2010	broiler	blaCMY-2									traT
p16C96-3	2004	broiler	blaCMY-2									traT
p19C79-2	2007	broiler	blaCMY-2									traT
p24C25-2	2012	broiler	blaCMY-2									traT
p41P1	2012	broiler	blaCMY-2		aac(3)-Via	aadA1	sul1					traT
p25C61-2	2013	broiler	blaCMY-2									traT
p20C118-2	2008	broiler	blaCMY-2									traT
p21C57-3	2009	broiler	blaCMY-2									traT
p36P3	2013	broiler	blaCMY-2									traT
pCOV9	-	broiler	blaCMY-2									traT
pNVI1292	2012	retail chicken meat	blaCMY-2									traT
pTMSA1088	2012	broiler	blaCMY-2									traT
p45P3	2012	broiler	blaCMY-2									traT
pDV10	2013	retail chicken meat	blaCMY-2									traT
pTMSA992	2012	broiler	blaCMY-2									traT
pZPK-H58	2017	goose	blaCMY-2									traT
pTMSA970	2012	broiler	blaCMY-2									traT
p52P2	2012	broiler	blaCMY-2									traT
p1517k_K	-	broiler	blaCMY-2									traT
p47P2	2012	broiler	blaCMY-2									traT
p46P3	2012	broiler	blaCMY-2
punnmaed2	2015	clinical	blaCMY-2
pPS15001	2015	Environment	blaCMY-2		aac(3)-Via	aadA1	sul1				cib	traT
pPS16002	2016	Environment	blaCMY-2		aac(3)-Via	aadA1	sul1		tet(A)		cib	traT
pSA17022	2017	broiler	blaCMY-2		aac(3)-Via	aadA1	sul1		tet(A)		cib	traT
pSA17023	2017	broiler	blaCMY-2		aac(3)-Via	aadA1	sul1		tet(A)		cib	traT
pSA17024	2017	broiler	blaCMY-2		aac(3)-Via	aadA1	sul1		tet(A)		cib	traT
pSB17033	2017	broiler	blaCMY-2		aac(3)-Via	aadA1	sul1		tet(A)		cib	traT
pSB17034	2017	broiler	blaCMY-2		aac(3)-Via	aadA1	sul1		tet(A)		cib	traT
pSB17037	2017	broiler	blaCMY-2		aac(3)-Via	aadA1	sul1		tet(A)		cib	traT
pSB17040	2017	broiler	blaCMY-2		aac(3)-Via	aadA1	sul1		tet(A)		cib	traT
pPS184-R	2017	broiler	blaCMY-2		aac(3)-Via	aadA1	sul1		tet(A)		cib	traT
pRL97	2012	retail chicken meat	blaCMY-2		aac(3)-Via	aadA1	sul1		tet(A)		cib	traT
pRL316	2012	retail chicken meat	blaCMY-2		aac(3)-Via	aadA1	sul1				cib	traT
pRL320	2012	retail chicken meat	blaCMY-2		aac(3)-Via	aadA1	sul1				cib	traT
pSB17103	2017	broiler	blaCMY-2	blaTEM-1				sul2	tet(A)	drfA1	cib	traT
pSB18102	2018	broiler	blaCMY-2	blaTEM-1				sul2	tet(A)	drfA1	cib	traT
pSB18001	2018	broiler	blaCMY-2	blaTEM-1				sul2	tet(A)	drfA1	cib	traT
pSB18002	2018	broiler	blaCMY-2	blaTEM-1				sul2	tet(A)	drfA1	cib	traT
pSB18003	2018	broiler	blaCMY-2	blaTEM-1				sul2	tet(A)	drfA1	cib	traT
pSB18004	2018	broiler	blaCMY-2	blaTEM-1				sul2	tet(A)	drfA1	cib	traT
pSA17101	2017	broiler	blaCMY-2		aac(3)-Via	aadA1	sul1		tet(A)		cib	traT
pSB17032	2017	broiler	blaCMY-2									traT
pSB17042	2017	broiler	blaCMY-2									traT
pHBI03	2021	clinical	blaCMY-2									traT
pHBI02	2020	clinical	blaCMY-2									traT
pHBI01	2017	clinical	blaCMY-2		aac(3)-Via	aadA1	sul1		tet(A)		cib	traT
pHBI04	2019	clinical	blaCMY-2									traT
pHBI05	2017	clinical	blaCMY-2									traT
pPS310-R	2017	broiler	blaCMY-2		aac(3)-Via	aadA1	sul1		tet(A)		cib	traT
p2016-40-16449	2016	broiler	blaCMY-2		aac(3)-Via	aadA1	sul1		tet(A)		cib	traT
p2016-40-16852	2016	broiler	blaCMY-2									traT
