# Supplementary figures and images for: Comparison of IncK-blaCMY-2 Plasmids in Extended-Spectrum Cephalosporin-Resistant Escherichia coli Isolated from Poultry and Humans in Denmark, Finland, and Germany
Source: MDPI journal article supplement (doi:10.3390/antibiotics13040349), 2024-04-10

(a)

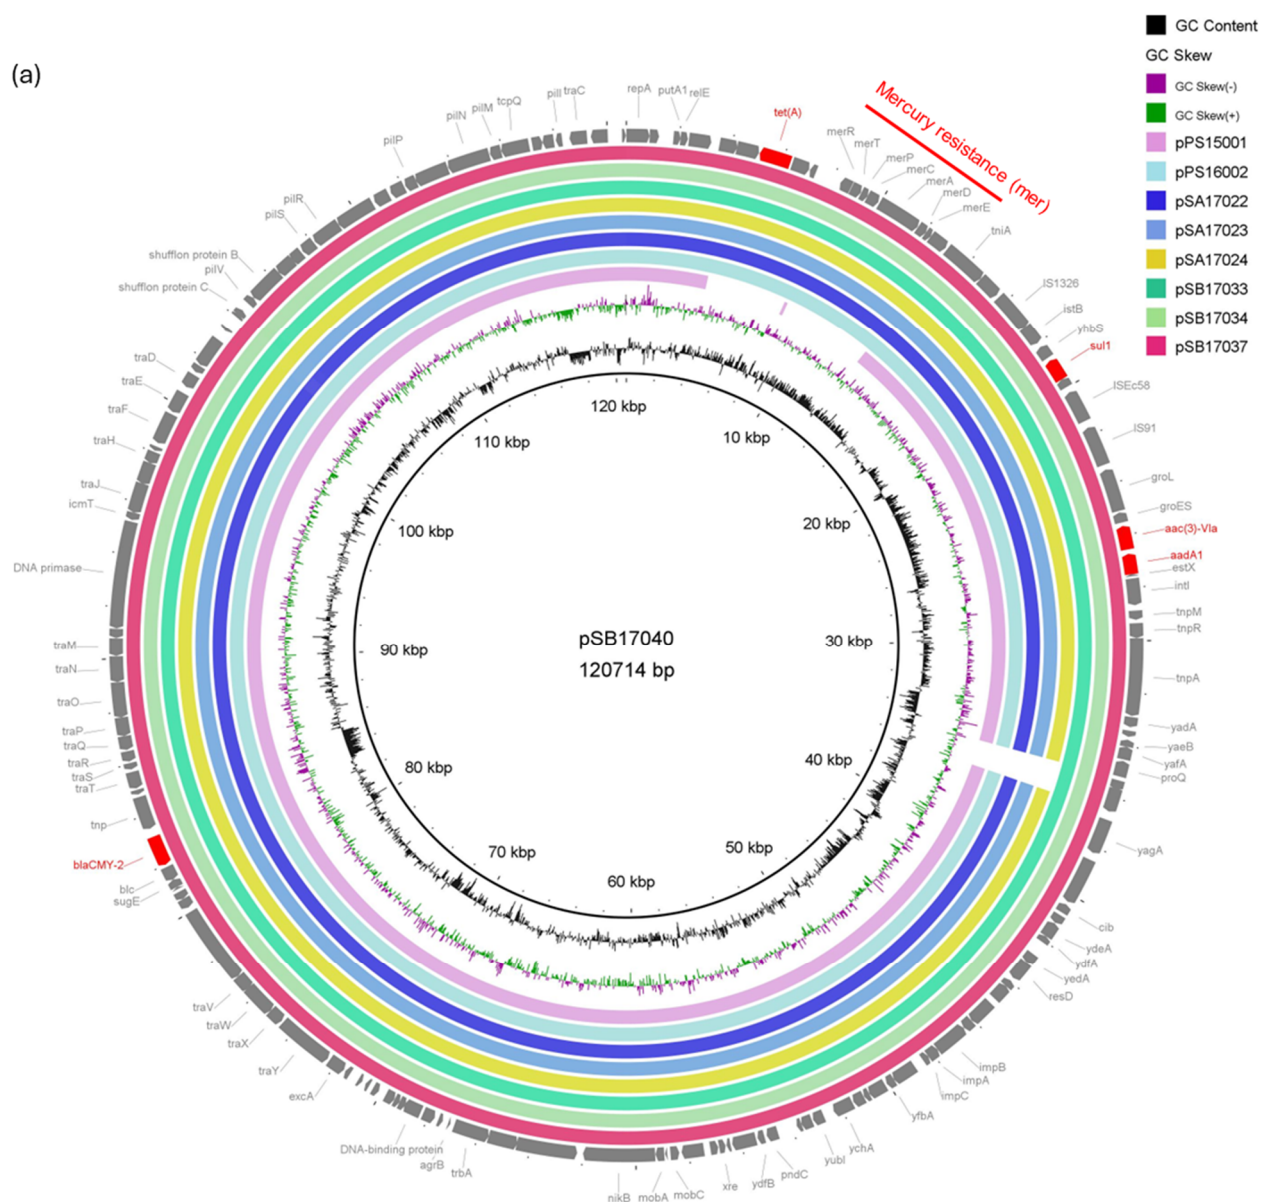

(b)

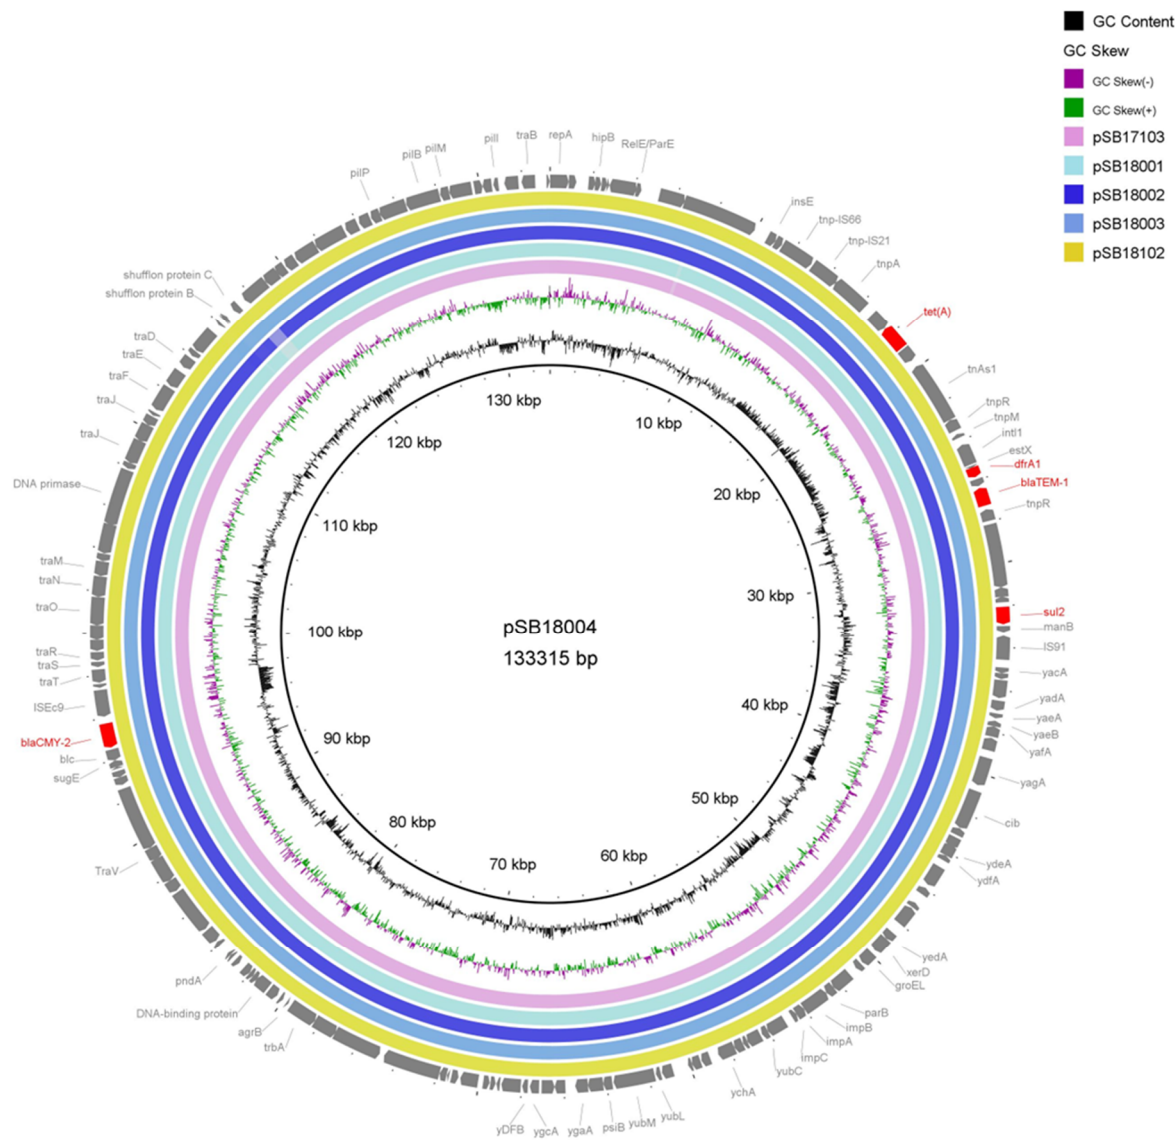

(c)

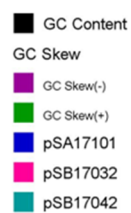

Supplement: s1 [file s1]
